# Supplementary material for: De novo assembly of Persea americana cv. ‘Hass’ transcriptome during fruit development
Source: BMC Genomics. 2019 Feb 6;20:108. doi: 10.1186/s12864-019-5486-7 (PMC6364401; doi:10.1186/s12864-019-5486-7)
Supplement: Supplementary file 5 — Expression subcluster matrix. Values of Trinity gene expression (TPM-TMM) for 15 subclusters identified by gene expression cluster analysis during fruit developmental stages (150, 240, 300 and 390 days after fruit set; DAFS) in Persea americana cv. Hass. (XLSX 713 kb) [file 12864_2019_5486_MOESM5_ESM.xlsx]

## Sheet: Subcluster1
Additional file 6. Expression subcluster matrix. Values of Trinity gene expression (TPM-TMM) for 15 subclusters identified by gene expression cluster analysis during fruit developmental stages (150, 240, 300 and 390 days after fruit set; DAFS) in Persea americana cv. Hass.
Trinity genes	150-DAFS	240-DAFS	300-DAFS	390-DAFS
CBV_PAM5164_c0_g2_i1	-1.00007	-1.52421	2.10622	0.418061
CBV_PAM1474_c3_g1_i1	-1.94917	0.323994	1.71041	-0.0852292
CBV_PAM51082_c0_g1_i1	-1.81795	0.229853	1.51518	0.0729154
CBV_PAM46704_c0_g1_i1	-1.54294	-0.30292	1.77	0.0758605
CBV_PAM10702_c0_g1_i1	-1.86904	0.422032	1.27369	0.173321
CBV_PAM67442_c1_g1_i1	-0.974722	0.181777	1.76767	-0.974722
CBV_PAM72365_c0_g1_i1	-1.40504	0.352001	1.61499	-0.561958
CBV_PAM51133_c1_g1_i1	-1.61949	0.480136	1.39417	-0.254818
CBV_PAM27256_c0_g1_i1	-1.28224	0.431421	1.56901	-0.718188
CBV_PAM6986_c0_g1_i1	-0.963181	-0.631135	1.84676	-0.252446
CBV_PAM10702_c0_g2_i1	-1.74184	0.458812	1.02225	0.260785
CBV_PAM52364_c0_g1_i1	-1.3389	-0.186028	1.56919	-0.0442702
CBV_PAM23686_c0_g1_i1	-1.43985	0.0310778	1.47446	-0.0656881
CBV_PAM65511_c0_g3_i1	-1.3147	-0.140929	1.544	-0.0883797
CBV_PAM66402_c0_g1_i1	-1.27978	0.418839	1.41322	-0.552276
CBV_PAM37723_c1_g1_i1	-1.29882	0.371009	1.41076	-0.482945
CBV_PAM39644_c0_g1_i1	-1.5211	0.369011	1.25643	-0.104338
CBV_PAM37967_c0_g4_i1	-1.57976	0.916094	0.769592	-0.105924
CBV_PAM29113_c0_g1_i1	-1.56499	0.759062	0.923033	-0.117105
CBV_PAM55910_c0_g1_i1	-1.29823	-0.286586	1.4497	0.135114
CBV_PAM2555_c1_g1_i1	-1.36735	-0.244669	1.33334	0.278676
CBV_PAM10961_c0_g5_i1	-1.11407	-0.733289	1.29558	0.551778
CBV_PAM11579_c2_g1_i1	-1.51389	0.396746	1.09804	0.0191127
CBV_PAM12730_c0_g1_i1	-1.58977	0.325766	0.958183	0.30582
CBV_PAM2286_c0_g1_i1	-1.55469	0.36668	1.00129	0.186715
CBV_PAM26921_c0_g3_i1	-1.08714	-0.257337	1.51772	-0.173241
CBV_PAM53542_c0_g1_i1	-1.15016	0.264656	1.38025	-0.494749
CBV_PAM41924_c0_g1_i1	-1.59628	0.378234	0.842319	0.375722
CBV_PAM65266_c0_g1_i1	-1.38109	-0.0812549	1.25343	0.20892
CBV_PAM15207_c0_g1_i1	-0.50789	-1.26492	1.07237	0.700437
CBV_PAM40389_c1_g1_i1	-0.926907	-0.323185	1.5547	-0.304609
CBV_PAM13463_c0_g1_i1	-1.32526	-0.283531	1.21187	0.396927
CBV_PAM4892_c0_g1_i1	-1.16334	0.415848	1.2779	-0.5304
CBV_PAM44068_c0_g1_i1	-1.4889	0.0540403	1.01985	0.415007
CBV_PAM760_c0_g1_i1	-1.48676	0.391747	1.01993	0.0750898
CBV_PAM52142_c1_g1_i1	-1.30969	-0.285037	1.20096	0.393759
CBV_PAM31042_c0_g2_i1	-1.44527	0.81136	0.778055	-0.144146
CBV_PAM41273_c0_g1_i1	-1.20512	-0.518253	1.1369	0.586478
CBV_PAM54603_c0_g1_i1	-1.52341	0.579894	0.811055	0.132463
CBV_PAM67706_c1_g1_i1	-1.1729	-0.481874	1.24713	0.407644
CBV_PAM51512_c0_g1_i1	-1.3391	0.00573629	1.22996	0.103405
CBV_PAM2429_c1_g1_i1	-1.48434	0.126787	0.967637	0.389912
CBV_PAM2100_c0_g1_i1	-1.22477	0.569446	1.10584	-0.45051
CBV_PAM10213_c0_g1_i1	-1.49574	0.302459	0.905413	0.287871
CBV_PAM68132_c0_g1_i1	-1.35777	0.0454267	1.16833	0.14401
CBV_PAM42473_c0_g1_i1	-0.937722	0.121207	1.40391	-0.587396
CBV_PAM20082_c0_g1_i1	-1.03988	-0.519477	1.34566	0.213694
CBV_PAM11494_c0_g1_i1	-1.40982	0.308243	1.05901	0.0425602
CBV_PAM57533_c0_g1_i1	-0.260362	-0.977648	1.45425	-0.216242
CBV_PAM26360_c0_g1_i1	-1.31561	0.032406	1.1969	0.0863028
CBV_PAM34925_c0_g1_i1	-0.990893	-0.469476	1.39531	0.0650575
CBV_PAM40572_c0_g1_i1	-1.4331	0.637101	0.817781	-0.021783
CBV_PAM3393_c0_g1_i1	-1.0704	-0.380311	1.34914	0.101572
CBV_PAM42041_c0_g1_i1	-0.958472	-0.777466	1.07038	0.665559
CBV_PAM26606_c0_g1_i1	-1.37988	0.472413	0.983556	-0.0760868
CBV_PAM3068_c0_g1_i1	-1.31641	-0.236307	0.986126	0.566592
CBV_PAM543_c7_g1_i1	-0.998712	-0.0476723	1.39685	-0.350467
CBV_PAM45123_c0_g1_i1	-1.087	0.571773	1.09729	-0.582065
CBV_PAM38514_c0_g1_i1	-1.10421	-0.243766	1.33106	0.0169164
CBV_PAM58532_c0_g1_i1	-1.24053	-0.245821	1.15469	0.331653
CBV_PAM38420_c0_g1_i1	-1.21421	-0.318517	1.12966	0.403074
CBV_PAM12248_c0_g1_i1	-1.32557	-0.0620597	1.07397	0.31366
CBV_PAM30036_c0_g1_i1	-1.34681	0.0568146	1.06523	0.224771
CBV_PAM68645_c0_g1_i1	-1.38263	0.148282	0.983455	0.250892
CBV_PAM37669_c0_g4_i1	-1.31822	0.540978	0.949132	-0.171896
CBV_PAM37844_c0_g1_i1	-1.07623	-0.3075	1.30275	0.0809761
CBV_PAM865_c1_g1_i1	-1.17954	-0.213757	1.21726	0.176036
CBV_PAM16538_c0_g1_i1	-1.33054	0.74517	0.76749	-0.182124
CBV_PAM26249_c0_g1_i1	-1.44339	0.555581	0.714611	0.173199
CBV_PAM6335_c0_g1_i1	-0.376429	-0.812433	1.43581	-0.246953
CBV_PAM114_c0_g1_i1	-0.548041	-0.536773	1.46639	-0.381579
CBV_PAM37720_c1_g1_i1	-1.15992	0.357267	1.13049	-0.327838
CBV_PAM46335_c0_g1_i1	-1.2135	0.149024	1.15998	-0.0955013
CBV_PAM50901_c1_g1_i1	-0.423178	-1.06022	1.20582	0.277574
CBV_PAM6443_c0_g1_i1	-1.1459	0.393035	1.1078	-0.354936
CBV_PAM1945_c0_g3_i1	-1.14523	0.575014	0.996832	-0.426611
CBV_PAM12300_c1_g1_i1	-0.0568708	-1.12246	1.24301	-0.0636782
CBV_PAM11061_c2_g1_i1	-1.1979	-0.123104	1.15236	0.168642
CBV_PAM1196_c0_g1_i1	-1.19654	0.757742	0.810594	-0.371796
CBV_PAM11629_c0_g1_i1	-1.1779	-0.362345	0.987342	0.552901
CBV_PAM52865_c0_g4_i1	-0.803399	-0.803399	1.12383	0.482968
CBV_PAM68750_c0_g1_i1	-1.07326	-0.380198	1.18971	0.263755
CBV_PAM13689_c0_g1_i1	-1.21778	0.290186	1.08581	-0.158213
CBV_PAM31770_c0_g1_i1	-1.05506	-0.455723	1.14801	0.36277
CBV_PAM25152_c0_g1_i1	-1.14975	-0.313247	1.10467	0.358322
CBV_PAM1479_c0_g1_i1	-1.07403	-0.150016	1.2558	-0.0317531
CBV_PAM54516_c0_g1_i1	-1.23825	0.828151	0.676708	-0.266605
CBV_PAM10202_c1_g1_i1	-1.18794	-0.0341528	1.14933	0.0727578
CBV_PAM41364_c0_g1_i1	-0.807905	-0.41015	1.37533	-0.157276
CBV_PAM23851_c1_g1_i1	-1.13699	0.030701	1.19795	-0.0916559
CBV_PAM40866_c0_g1_i1	-1.36987	0.273063	0.851463	0.245346
CBV_PAM39000_c0_g1_i1	-1.00801	-0.523166	1.13552	0.395653
CBV_PAM1962_c0_g1_i1	-1.40336	0.318605	0.73021	0.354548
CBV_PAM64777_c0_g1_i1	-0.697667	-0.830162	1.20011	0.327721
CBV_PAM1058_c1_g1_i1	-1.17503	-0.240229	1.0813	0.333964
CBV_PAM24969_c1_g1_i1	-0.949395	0.170485	1.24105	-0.462136
CBV_PAM68295_c0_g1_i1	-1.08978	0.0250546	1.20882	-0.144097
CBV_PAM7445_c0_g1_i1	-0.627497	-0.627497	1.35273	-0.0977354
CBV_PAM13907_c0_g1_i1	-1.28786	0.262428	0.925533	0.099897
CBV_PAM45236_c0_g1_i1	-0.916999	0.267102	1.18024	-0.530339
CBV_PAM61870_c0_g2_i1	-0.463787	-0.463787	1.39136	-0.463787
CBV_PAM2724_c0_g1_i1	-1.22012	-0.163675	0.922715	0.461076
CBV_PAM10666_c0_g1_i1	-1.16675	-0.208669	1.02045	0.354968
CBV_PAM10974_c1_g1_i1	-0.903979	-0.686332	0.827926	0.762386
CBV_PAM56345_c1_g1_i1	-0.689716	-0.729775	1.22782	0.19167
CBV_PAM23729_c0_g1_i1	-1.34675	0.279646	0.736291	0.330811
CBV_PAM13385_c0_g1_i1	-1.27323	0.00208899	0.869658	0.401485
CBV_PAM339_c0_g1_i1	-1.13638	-0.333145	0.896019	0.573505
CBV_PAM12107_c0_g3_i1	-1.20307	0.514138	0.883099	-0.194165
CBV_PAM23891_c0_g1_i1	-1.21661	-0.00111322	0.990846	0.226879
CBV_PAM52463_c0_g1_i1	-0.927373	-0.335247	1.24116	0.0214623
CBV_PAM64806_c0_g1_i1	-1.19817	0.708905	0.721117	-0.231855
CBV_PAM26404_c0_g1_i1	-1.0381	-0.131004	1.18506	-0.0159511
CBV_PAM3903_c0_g1_i1	-1.25778	-0.0785528	0.763185	0.573147
CBV_PAM51087_c1_g1_i1	-1.10253	-0.327581	0.988015	0.442094
CBV_PAM55764_c0_g1_i1	-1.30546	0.582959	0.667667	0.0548349
CBV_PAM12388_c0_g3_i1	-1.1736	-0.0367876	1.03754	0.17284
CBV_PAM37265_c0_g3_i1	-1.23509	0.256601	0.944461	0.034025
CBV_PAM5072_c0_g1_i1	-0.726425	-0.835271	0.912305	0.64939
CBV_PAM52187_c1_g1_i1	-1.33535	0.506353	0.628509	0.20049
CBV_PAM65052_c0_g1_i1	-1.04479	-0.468776	0.760682	0.752881
CBV_PAM17039_c0_g1_i1	-0.795354	-0.55928	1.22045	0.134181
CBV_PAM28447_c0_g1_i1	-0.918134	0.535227	0.981595	-0.598688
CBV_PAM19323_c0_g1_i1	-0.656138	-0.891341	0.811947	0.735532
CBV_PAM12582_c0_g2_i1	-0.970838	-0.490875	1.02215	0.439563
CBV_PAM65571_c0_g1_i1	-0.942935	0.42841	1.03291	-0.518387
CBV_PAM3950_c2_g1_i1	-0.934192	-0.494482	1.07233	0.35634
CBV_PAM25057_c0_g1_i1	-1.22398	-0.098728	0.731845	0.590864
CBV_PAM50789_c0_g1_i1	-1.2962	0.256244	0.745731	0.294225
CBV_PAM3593_c0_g1_i1	-1.23872	0.197926	0.882204	0.158594
CBV_PAM3741_c0_g1_i1	-1.20033	-0.0928041	0.856697	0.436436
CBV_PAM215_c0_g2_i1	-1.24766	0.502294	0.746748	-0.00138646
CBV_PAM26062_c1_g1_i1	-0.729005	-0.216581	1.28308	-0.337492
CBV_PAM12883_c0_g1_i1	-0.853813	-0.527385	1.11913	0.262067
CBV_PAM20238_c0_g1_i1	-1.2079	0.506522	0.778877	-0.0775021
CBV_PAM69117_c0_g1_i1	-1.09378	-0.318566	0.804248	0.608096
CBV_PAM13195_c0_g1_i1	-0.825232	-0.12385	1.2345	-0.285415
CBV_PAM26231_c2_g1_i1	-1.19475	-0.115336	0.688611	0.621478
CBV_PAM4750_c0_g1_i1	-1.24838	0.0845016	0.737751	0.426122
CBV_PAM75698_c0_g1_i1	-1.22961	0.0487321	0.774497	0.406382
CBV_PAM38838_c1_g2_i1	-1.06148	0.137375	1.05557	-0.131468
CBV_PAM65939_c0_g1_i1	-0.89129	-0.0919268	1.1933	-0.210083
CBV_PAM55266_c0_g1_i1	-1.1146	0.188653	0.989151	-0.0632026
CBV_PAM12756_c0_g2_i1	-0.0762369	-1.18503	0.785275	0.475997
CBV_PAM40098_c0_g1_i1	-1.18659	0.237128	0.884716	0.0647432
CBV_PAM41012_c0_g1_i1	-0.972451	-0.137786	1.12912	-0.0188839
CBV_PAM26369_c0_g1_i1	-1.21565	0.408067	0.766658	0.0409202
CBV_PAM64539_c0_g1_i1	-1.22437	0.211973	0.782081	0.230312
CBV_PAM40301_c0_g1_i1	-1.05453	-0.336839	0.739001	0.652373
CBV_PAM28958_c0_g1_i1	-0.928628	0.373528	0.998123	-0.443022
CBV_PAM53064_c0_g1_i1	-0.93414	-0.460287	0.958313	0.436113
CBV_PAM39922_c0_g1_i1	-0.687866	-0.548998	1.18702	0.0498425
CBV_PAM58203_c0_g1_i1	-1.16686	-0.0476866	0.812748	0.401797
CBV_PAM2515_c0_g6_i1	-0.999346	-0.0552514	1.08383	-0.0292292
CBV_PAM67707_c0_g1_i1	-0.78473	-0.673336	0.589583	0.868482
CBV_PAM5252_c0_g1_i1	-0.993378	-0.141663	1.07632	0.0587243
CBV_PAM26624_c0_g1_i1	-1.08003	0.0304828	0.991275	0.0582726
CBV_PAM5816_c0_g1_i1	-1.14119	0.110584	0.904471	0.12614
CBV_PAM55520_c0_g1_i1	-0.855352	0.228865	1.07588	-0.449394
CBV_PAM7114_c0_g1_i1	-1.1786	0.386594	0.775909	0.0161008
CBV_PAM51795_c0_g1_i1	-1.15824	0.078583	0.848146	0.231515
CBV_PAM67345_c0_g1_i1	-0.549399	-0.40153	1.2516	-0.300668
CBV_PAM68736_c0_g1_i1	-1.05996	0.129274	0.988085	-0.0573995
CBV_PAM37297_c0_g1_i1	-1.00299	-0.331094	0.898441	0.435639
CBV_PAM12728_c0_g1_i1	-0.0431988	-1.05411	0.994036	0.103269
CBV_PAM14569_c0_g1_i1	-1.09554	0.0242194	0.941438	0.129884
CBV_PAM48467_c0_g1_i1	-0.85859	0.0937554	1.11136	-0.346524
CBV_PAM12391_c1_g1_i1	-1.0846	-0.160658	0.870561	0.374693
CBV_PAM11609_c0_g1_i1	-0.973704	0.091723	1.04996	-0.167977
CBV_PAM40205_c1_g1_i1	-0.785254	-0.652711	0.780579	0.657386
CBV_PAM51664_c0_g1_i1	-1.0773	0.152634	0.947802	-0.0231346
CBV_PAM37449_c0_g3_i1	-0.96442	0.772901	0.60704	-0.415521
CBV_PAM66339_c1_g2_i1	-0.414615	-0.414615	1.24385	-0.414615
CBV_PAM51256_c1_g1_i1	-1.19715	0.54468	0.569808	0.0826596
CBV_PAM52580_c0_g1_i1	-1.0181	-0.320993	0.780902	0.558189
CBV_PAM66583_c0_g1_i1	-1.15231	0.235029	0.815185	0.102097
CBV_PAM26351_c0_g1_i1	-0.887392	-0.235005	1.09985	0.0225469
CBV_PAM61519_c0_g1_i1	-1.16234	0.450391	0.70343	0.00852414
CBV_PAM42089_c0_g1_i1	-0.932086	-0.42648	0.871743	0.486823
CBV_PAM26021_c0_g1_i1	-0.774433	-0.643093	0.830111	0.587416
CBV_PAM65664_c0_g4_i1	-0.913076	0.150945	1.05056	-0.288424
CBV_PAM1737_c0_g1_i1	-1.11808	0.23242	0.857645	0.0280121
CBV_PAM24902_c0_g1_i1	-1.00285	-0.186922	0.976652	0.213117
CBV_PAM69439_c0_g1_i1	-1.00015	-0.169245	0.988875	0.180519
CBV_PAM54251_c0_g1_i1	-0.506331	-0.209526	1.21845	-0.502596
CBV_PAM67657_c0_g1_i1	-1.16913	0.518942	0.632663	0.0175295
CBV_PAM1676_c0_g2_i1	-0.618225	-0.618225	1.1209	0.115548
CBV_PAM17802_c0_g1_i1	-1.00488	0.568308	0.768009	-0.331436
CBV_PAM18094_c0_g1_i1	-0.933167	-0.254091	1.03581	0.151452
CBV_PAM37364_c2_g1_i1	-1.1135	0.65341	0.584469	-0.124379
CBV_PAM45566_c0_g4_i1	-0.361562	-0.859957	1.06215	0.159366
CBV_PAM38769_c0_g1_i1	-0.798	-0.550248	0.966146	0.382103
CBV_PAM23784_c2_g1_i1	-0.627034	-0.638899	1.08915	0.176787
CBV_PAM37686_c2_g2_i1	-0.256511	-0.561321	1.21124	-0.393409
CBV_PAM10784_c0_g1_i1	-0.693181	-0.393912	1.16538	-0.0782846
CBV_PAM23759_c0_g4_i1	-0.69703	-0.69703	0.855689	0.53837
CBV_PAM28029_c0_g1_i1	-1.1714	0.258072	0.699324	0.214005
CBV_PAM3007_c0_g1_i1	-0.965554	-0.353633	0.808328	0.510859
CBV_PAM58209_c1_g1_i1	-0.956876	0.170251	0.989563	-0.202938
CBV_PAM66075_c0_g1_i1	-0.437823	-0.89992	0.852853	0.48489
CBV_PAM28155_c0_g1_i1	-0.657134	-0.542596	1.10108	0.0986534
CBV_PAM2818_c0_g1_i1	-0.705917	-0.151508	1.15613	-0.298702
CBV_PAM66881_c2_g1_i1	-0.137623	-0.629388	1.16881	-0.401798
CBV_PAM15501_c0_g1_i1	-0.775471	-0.504136	1.00414	0.275472
CBV_PAM37327_c0_g1_i1	-1.17627	0.170336	0.602924	0.403006
CBV_PAM51269_c1_g1_i1	-1.04007	-0.223388	0.6927	0.570763
CBV_PAM45022_c0_g1_i1	-0.976907	-0.281712	0.858725	0.399893
CBV_PAM64253_c0_g1_i1	-0.68785	-0.68785	0.826316	0.549384
CBV_PAM5564_c0_g1_i1	-0.996142	-0.28774	0.764107	0.519774
CBV_PAM5068_c0_g1_i1	-0.918567	-0.0817973	1.03646	-0.0360906
CBV_PAM28253_c0_g1_i1	-0.944206	-0.279683	0.932068	0.291821
CBV_PAM43491_c0_g1_i1	-0.745963	0.0683146	1.08903	-0.411381
CBV_PAM37716_c0_g1_i1	-0.952132	0.200278	0.954976	-0.203122
CBV_PAM73324_c0_g1_i1	-0.970143	-0.169573	0.939313	0.200403
CBV_PAM23814_c0_g1_i1	-1.0772	0.00125902	0.809128	0.266809
CBV_PAM163_c0_g3_i1	-0.869996	-0.469033	0.596115	0.742914
CBV_PAM27041_c0_g1_i1	-0.900263	0.0187737	1.02508	-0.14359
CBV_PAM863_c0_g1_i1	-1.00762	-0.180464	0.846569	0.34152
CBV_PAM24013_c1_g1_i1	-1.06482	0.0198639	0.82813	0.216824
CBV_PAM34307_c0_g1_i1	-0.554693	-0.123743	1.14864	-0.470207
CBV_PAM20516_c0_g1_i1	-1.02749	-0.156603	0.794352	0.389745
CBV_PAM12923_c0_g1_i1	-1.05269	0.604381	0.60056	-0.152249
CBV_PAM38817_c1_g1_i1	-0.996585	-0.0933654	0.902616	0.187335
CBV_PAM29930_c0_g1_i1	-1.10617	0.375594	0.693174	0.037405
CBV_PAM64527_c0_g1_i1	-0.762031	0.177595	1.02097	-0.436532
CBV_PAM37669_c0_g7_i1	-1.04999	-0.0330999	0.817631	0.26546
CBV_PAM19260_c0_g1_i1	-0.590554	-0.57626	1.0734	0.093419
CBV_PAM51342_c0_g1_i1	-0.865737	-0.252845	1.00633	0.112251
CBV_PAM4328_c0_g1_i1	-1.12239	0.265105	0.689782	0.1675
CBV_PAM697_c0_g2_i1	-0.0368434	-1.05703	0.782153	0.311723
CBV_PAM12621_c1_g1_i1	-0.869317	-0.206754	1.01193	0.0641363
CBV_PAM25241_c0_g1_i1	-1.10241	0.0274084	0.659774	0.415225
CBV_PAM50939_c1_g3_i1	-0.862264	-0.441337	0.78244	0.521161
CBV_PAM25385_c0_g1_i1	-0.817899	-0.0573802	1.05418	-0.178901
CBV_PAM24377_c0_g1_i1	-0.952097	0.458016	0.78049	-0.286409
CBV_PAM1033_c1_g1_i1	-0.873943	-0.00641477	1.00905	-0.128688
CBV_PAM40082_c0_g1_i1	-1.01038	-0.186227	0.703638	0.492972
CBV_PAM36106_c0_g1_i1	-0.639168	-0.454219	1.08494	0.00845049
CBV_PAM37205_c3_g1_i1	-0.920981	0.19051	0.930985	-0.200514
CBV_PAM13712_c0_g1_i1	-0.656427	-0.678203	0.707699	0.626931
CBV_PAM3413_c0_g1_i1	-1.01962	-0.0937593	0.794813	0.318562
CBV_PAM40527_c0_g3_i1	-0.246184	-0.450066	1.14632	-0.450066
CBV_PAM19217_c0_g1_i1	-0.749136	-0.495944	0.929134	0.315946
CBV_PAM43747_c1_g1_i1	-0.853334	-0.111109	1.01249	-0.0480468
CBV_PAM470_c1_g1_i1	-0.919823	-0.344982	0.655699	0.609106
CBV_PAM47615_c0_g1_i1	-0.574985	0.105079	1.04489	-0.574985
CBV_PAM50939_c1_g5_i1	-1.03832	0.102981	0.811767	0.123574
CBV_PAM839_c0_g1_i1	-0.845399	0.36159	0.871432	-0.387623
CBV_PAM15195_c1_g1_i1	-0.939437	-0.246662	0.819404	0.366694
CBV_PAM54545_c0_g1_i1	-0.977484	-0.0306795	0.878667	0.129496
CBV_PAM37322_c0_g1_i1	-1.04968	0.574269	0.551962	-0.0765507
CBV_PAM43422_c1_g1_i1	-0.765129	-0.426679	0.949957	0.241851
CBV_PAM31048_c0_g1_i1	-0.839807	-0.120611	0.997019	-0.0366002
CBV_PAM34633_c0_g3_i1	-0.590081	-0.590081	0.991481	0.18868
CBV_PAM11753_c0_g1_i1	-0.577977	-0.658989	0.907185	0.329781
CBV_PAM16493_c0_g1_i1	-0.6218	-0.107546	1.08203	-0.352682
CBV_PAM64435_c0_g10_i1	-0.873256	-0.304379	0.856017	0.321619
CBV_PAM51468_c0_g3_i1	-0.375184	-0.375184	1.12555	-0.375184
CBV_PAM55628_c0_g1_i1	-0.93714	-0.267271	0.652609	0.551802
CBV_PAM13774_c0_g1_i1	-0.806593	-0.466834	0.61811	0.655317
CBV_PAM10496_c1_g1_i1	-1.06226	0.22471	0.691237	0.146315
CBV_PAM4021_c0_g1_i1	-0.996137	-0.0999577	0.734683	0.361411
CBV_PAM25807_c0_g1_i1	-0.950381	0.0428744	0.872976	0.0345308
CBV_PAM25454_c1_g1_i1	-0.751597	0.271698	0.914297	-0.434398
CBV_PAM30844_c0_g1_i1	-0.832922	0.223644	0.910048	-0.30077
CBV_PAM54200_c1_g1_i1	-0.321561	-0.473319	1.11105	-0.316172
CBV_PAM70235_c0_g1_i1	-0.973254	-0.153662	0.722888	0.404028
CBV_PAM5566_c0_g1_i1	-1.01298	-0.0420516	0.712998	0.342031
CBV_PAM76117_c0_g1_i1	-0.665939	-0.358551	1.03774	-0.0132542
CBV_PAM56586_c0_g1_i1	-0.944089	-0.226143	0.675176	0.495057
CBV_PAM25108_c0_g5_i1	-0.541698	-0.541698	1.02609	0.0573062
CBV_PAM45797_c0_g1_i1	-0.927695	-0.0244899	0.880669	0.0715163
CBV_PAM51806_c0_g1_i1	0.0198005	-0.810732	0.973268	-0.182337
CBV_PAM2743_c0_g2_i1	-0.923222	0.525188	0.662474	-0.26444
CBV_PAM74677_c0_g1_i1	-0.890216	0.200717	0.876491	-0.186992
CBV_PAM38076_c3_g1_i1	-0.850635	-0.194855	0.924351	0.121139
CBV_PAM40822_c0_g1_i1	-0.934309	-0.207213	0.7477	0.393822
CBV_PAM1029_c0_g6_i1	-1.04872	0.0923061	0.6567	0.299716
CBV_PAM53764_c0_g1_i1	-0.6482	-0.168061	1.0579	-0.241635
CBV_PAM47567_c0_g1_i1	-0.856678	-0.122236	0.93181	0.0471037
CBV_PAM54950_c0_g1_i1	-0.699932	0.0276644	1.00704	-0.334768
CBV_PAM38636_c0_g1_i1	-0.917116	-0.243935	0.715231	0.44582
CBV_PAM24565_c0_g1_i1	-0.223496	-0.874394	0.859449	0.238441
CBV_PAM26399_c0_g1_i1	-0.777706	-0.0520475	0.988267	-0.158514
CBV_PAM70070_c0_g1_i1	-1.02189	0.200985	0.715267	0.105643
CBV_PAM29896_c0_g1_i1	-0.769259	-0.470012	0.729564	0.509707
CBV_PAM67302_c2_g1_i1	-0.955811	0.163306	0.813515	-0.0210103
CBV_PAM25034_c0_g1_i1	-0.806252	-0.429725	0.582073	0.653904
CBV_PAM37629_c0_g1_i1	-0.992537	0.171561	0.763215	0.0577622
CBV_PAM23992_c0_g1_i1	-0.859888	0.00375076	0.923672	-0.0675351
CBV_PAM11389_c0_g1_i1	-1.03141	0.131591	0.68253	0.217288
CBV_PAM25108_c0_g9_i1	-0.730994	-0.181966	1.0073	-0.0943388
CBV_PAM52523_c1_g1_i1	-0.960544	0.598808	0.529258	-0.167522
CBV_PAM51625_c0_g1_i1	-0.818135	-0.258362	0.906739	0.169758
CBV_PAM32439_c0_g1_i1	-0.820826	0.103738	0.926493	-0.209404
CBV_PAM23885_c0_g1_i1	-0.491275	-0.545957	1.02129	0.0159454
CBV_PAM38294_c1_g1_i1	-0.615149	-0.350612	1.0366	-0.0708389
CBV_PAM59235_c0_g1_i1	-0.715215	-0.500594	0.806558	0.40925
CBV_PAM5470_c0_g1_i1	-0.948365	0.00537696	0.813378	0.12961
CBV_PAM25815_c0_g1_i1	-0.949289	0.389928	0.708569	-0.149208
CBV_PAM23757_c0_g1_i1	-0.721328	0.161613	0.940378	-0.380663
CBV_PAM64661_c1_g1_i1	-0.932764	0.704754	0.410726	-0.182717
CBV_PAM12570_c0_g1_i1	-0.407592	-0.413672	1.07817	-0.256907
CBV_PAM28925_c1_g1_i1	-0.898827	-0.0556891	0.863782	0.0907337
CBV_PAM70774_c0_g1_i1	-0.66226	0.0475061	0.987838	-0.373084
CBV_PAM45330_c0_g1_i1	-0.839563	0.531497	0.663966	-0.3559
CBV_PAM24481_c0_g1_i1	-1.0069	-0.0205945	0.592419	0.435079
CBV_PAM69863_c0_g1_i1	-0.844691	-0.0859234	0.912435	0.0181786
CBV_PAM16845_c0_g1_i1	-1.03704	0.186509	0.622658	0.227877
CBV_PAM39371_c0_g1_i1	-0.36408	-0.416497	1.07486	-0.294282
CBV_PAM508_c0_g4_i1	-0.700398	0.0651601	0.96963	-0.334392
CBV_PAM23963_c0_g1_i1	-0.974316	0.124906	0.756254	0.0931565
CBV_PAM12892_c0_g1_i1	-0.802314	-0.403236	0.536271	0.669279
CBV_PAM190_c1_g1_i1	-0.75393	-0.220857	0.960954	0.013833
CBV_PAM53892_c0_g1_i1	-0.920195	0.358071	0.732225	-0.170101
CBV_PAM4543_c1_g1_i1	-0.774674	-0.138689	0.957576	-0.0442135
CBV_PAM60632_c0_g1_i1	-0.8611	-0.267527	0.77182	0.356806
CBV_PAM51958_c0_g1_i1	-0.508003	-0.0893755	1.03639	-0.439014
CBV_PAM44343_c1_g1_i1	-1.0009	0.0178419	0.63575	0.347311
CBV_PAM26711_c0_g1_i1	-0.913483	-0.203076	0.666982	0.449577
CBV_PAM65195_c0_g1_i1	-1.01177	0.313077	0.62187	0.0768226
CBV_PAM37978_c0_g1_i1	-0.843089	0.340008	0.779967	-0.276885
CBV_PAM31272_c0_g1_i1	-0.99138	-0.0204898	0.587157	0.424713
CBV_PAM52126_c1_g1_i1	-0.775355	0.191729	0.88315	-0.299524
CBV_PAM20283_c0_g1_i1	-0.693445	-0.521679	0.688675	0.526449
CBV_PAM69655_c0_g1_i1	-0.844038	-0.14861	0.867557	0.125091
CBV_PAM54540_c0_g1_i1	-0.939678	-0.00842977	0.765205	0.182902
CBV_PAM69883_c0_g1_i1	-0.734273	-0.353141	0.892297	0.195116
CBV_PAM1114_c4_g1_i1	-1.0378	0.242691	0.547054	0.248055
CBV_PAM11754_c0_g1_i1	-0.664034	0.254901	0.877218	-0.468086
CBV_PAM68443_c0_g1_i1	-0.781612	-0.216745	0.910273	0.0880842
CBV_PAM52493_c2_g1_i1	-0.770009	-0.0215469	0.935913	-0.144357
CBV_PAM727_c2_g1_i1	-0.711973	0.220745	0.882253	-0.391025
CBV_PAM72285_c0_g1_i1	-0.865149	0.125648	0.842811	-0.10331
CBV_PAM52220_c0_g1_i1	-0.956648	-0.0959252	0.580283	0.47229
CBV_PAM29945_c0_g1_i1	-0.742207	-0.0849103	0.953386	-0.126269
CBV_PAM12292_c0_g1_i1	-1.03539	0.185607	0.512238	0.337548
CBV_PAM17102_c0_g1_i1	-0.882401	-0.0684669	0.826516	0.124352
CBV_PAM59343_c0_g1_i1	-0.471529	-0.205929	1.03927	-0.361814
CBV_PAM52976_c0_g1_i1	-0.878454	-0.25211	0.55969	0.570874
CBV_PAM41071_c0_g5_i1	-0.793489	-0.375588	0.681995	0.487082
CBV_PAM51172_c0_g1_i1	-0.671286	-0.362728	0.935399	0.0986139
CBV_PAM66772_c0_g1_i1	-1.00915	0.146034	0.59603	0.267087
CBV_PAM51338_c0_g1_i1	-0.978151	0.0138917	0.618636	0.345624
CBV_PAM52764_c0_g1_i1	-0.993881	0.433918	0.528838	0.0311252
CBV_PAM56332_c0_g1_i1	-0.647925	-0.345908	0.956408	0.0374254
CBV_PAM11184_c0_g1_i1	-0.885405	0.433698	0.659236	-0.20753
CBV_PAM72210_c1_g1_i1	-0.876868	-0.121833	0.787857	0.210844
CBV_PAM696_c0_g1_i1	-1.01035	0.187373	0.571315	0.251662
CBV_PAM68372_c0_g1_i1	-0.973939	0.0993824	0.661407	0.213149
CBV_PAM30417_c0_g1_i1	-0.578042	-0.55638	0.843418	0.291004
CBV_PAM67622_c0_g1_i1	-0.833768	0.298068	0.773413	-0.237713
CBV_PAM51029_c1_g1_i1	-0.990012	0.131593	0.617073	0.241346
CBV_PAM54128_c0_g1_i1	-0.860894	-0.0866185	0.819291	0.128222
CBV_PAM38770_c1_g1_i1	-0.569543	-0.531562	0.873744	0.227361
CBV_PAM2311_c0_g1_i1	-0.50032	-0.514534	0.949869	0.0649849
CBV_PAM53906_c0_g1_i1	-0.951693	0.351884	0.617483	-0.0176749
CBV_PAM10238_c0_g4_i1	-0.342785	-0.342785	1.02836	-0.342785
CBV_PAM52462_c1_g1_i1	-0.776695	-0.269814	0.826681	0.219828
CBV_PAM62727_c0_g1_i1	-0.68208	-0.430747	0.818595	0.294233
CBV_PAM29053_c0_g1_i1	-0.715372	-0.454365	0.614522	0.555215
CBV_PAM25708_c0_g1_i1	-0.914608	-0.104657	0.643254	0.376011
CBV_PAM19692_c0_g1_i1	-0.870626	0.221374	0.75312	-0.103867
CBV_PAM4057_c0_g2_i1	-0.744067	-0.0903841	0.901574	-0.0671227
CBV_PAM8150_c0_g1_i1	-0.773933	0.0456429	0.869836	-0.141545
CBV_PAM52511_c0_g1_i1	-0.44239	-0.314866	1.0094	-0.252145
CBV_PAM23783_c0_g1_i1	-0.61523	0.0794591	0.918507	-0.382736
CBV_PAM68989_c0_g1_i1	-0.556728	-0.556728	0.816611	0.296844
CBV_PAM2831_c0_g1_i1	-0.602756	-0.537939	0.757655	0.38304
CBV_PAM780_c0_g1_i1	-0.966593	0.0549293	0.553257	0.358407
CBV_PAM21614_c0_g1_i1	-0.908116	0.231881	0.698515	-0.0222796
CBV_PAM65664_c0_g1_i1	-0.765373	0.290156	0.777946	-0.302728
CBV_PAM24453_c0_g1_i1	-0.870854	-0.0786082	0.747514	0.201948
CBV_PAM68316_c0_g1_i1	-0.84048	0.179165	0.781624	-0.12031
CBV_PAM24974_c0_g1_i1	-0.825583	-0.245883	0.690045	0.38142
CBV_PAM11702_c0_g3_i1	-0.724691	-0.294943	0.844696	0.174938
CBV_PAM4431_c0_g1_i1	-0.778345	-0.11911	0.85522	0.0422342
CBV_PAM7087_c0_g1_i1	-0.758338	-0.146531	0.86863	0.0362394
CBV_PAM41763_c0_g1_i1	-0.798048	0.124029	0.822337	-0.148318
CBV_PAM18483_c0_g1_i1	-0.662564	-0.48191	0.675337	0.469137
CBV_PAM32332_c0_g1_i1	-0.758342	0.171767	0.826984	-0.24041
CBV_PAM12502_c1_g1_i1	-0.89725	-0.107826	0.611205	0.393871
CBV_PAM24503_c0_g1_i1	-0.883155	-0.148218	0.579335	0.452038
CBV_PAM51732_c0_g1_i1	-0.809333	-0.28578	0.59113	0.503983
CBV_PAM10699_c0_g1_i1	-0.636964	-0.473345	0.771583	0.338725
CBV_PAM40006_c0_g1_i1	-0.715586	-0.411054	0.665134	0.461506
CBV_PAM211_c1_g1_i1	-0.82174	0.0512296	0.809483	-0.0389725
CBV_PAM26977_c1_g1_i1	-0.764094	0.22784	0.793774	-0.257521
CBV_PAM39367_c0_g1_i1	-0.891079	-0.00288411	0.708761	0.185202
CBV_PAM40844_c0_g1_i1	-0.603306	-0.13686	0.949634	-0.209467
CBV_PAM30283_c0_g1_i1	-0.732908	-0.0452991	0.880102	-0.101895
CBV_PAM35315_c0_g1_i1	-0.882457	0.342114	0.645227	-0.104884
CBV_PAM16438_c0_g1_i1	-0.649016	-0.431373	0.79291	0.287479
CBV_PAM51400_c1_g1_i1	-0.785952	-0.311521	0.56794	0.529533
CBV_PAM68722_c0_g1_i1	-0.400149	-0.272142	0.990901	-0.31861
CBV_PAM42589_c0_g1_i1	-0.722788	-0.401073	0.592898	0.530963
CBV_PAM58119_c0_g1_i1	-0.792714	0.224041	0.770759	-0.202086
CBV_PAM4795_c0_g1_i1	-0.955634	0.235588	0.565733	0.154313
CBV_PAM40268_c0_g1_i1	-0.956904	0.154947	0.560119	0.241837
CBV_PAM51974_c0_g1_i1	-0.816129	-0.230064	0.673419	0.372775
CBV_PAM76130_c0_g1_i1	-0.313936	-0.411769	0.987357	-0.261652
CBV_PAM46502_c0_g1_i1	-0.648029	-0.483045	0.65364	0.477434
CBV_PAM64532_c0_g1_i1	-0.949878	0.207623	0.580056	0.1622
CBV_PAM25852_c1_g1_i1	-0.497785	-0.278137	0.971116	-0.195194
CBV_PAM26721_c0_g1_i1	-0.736291	-0.016085	0.865839	-0.113464
CBV_PAM9549_c0_g1_i1	-0.58641	0.007768	0.917715	-0.339073
CBV_PAM66231_c0_g1_i1	-0.631695	-0.157063	0.924919	-0.136161
CBV_PAM13796_c0_g1_i1	-0.750229	0.0773337	0.837605	-0.16471
CBV_PAM3989_c0_g1_i1	-0.830177	-0.110437	0.745073	0.195541
CBV_PAM23997_c0_g1_i1	-0.632786	-0.388143	0.84213	0.178799
CBV_PAM3439_c0_g1_i1	-0.761654	-0.209336	0.796104	0.174886
CBV_PAM72850_c0_g1_i1	-0.824725	-0.100774	0.752534	0.172965
CBV_PAM11090_c1_g1_i1	-0.931195	0.0356431	0.540131	0.355422
CBV_PAM38016_c0_g1_i1	-0.523278	-0.26708	0.95224	-0.161882
CBV_PAM73541_c0_g1_i1	-0.499522	-0.305592	0.953483	-0.148369
CBV_PAM37758_c1_g1_i1	-0.864424	-0.00493571	0.706422	0.162937
CBV_PAM39292_c1_g1_i1	-0.819381	0.31472	0.683915	-0.179254
CBV_PAM38554_c1_g1_i1	-0.800708	-0.259184	0.518228	0.541664
CBV_PAM51195_c0_g3_i1	-0.866922	0.413488	0.572059	-0.118626
CBV_PAM14888_c0_g1_i1	-0.934936	0.252668	0.556228	0.12604
CBV_PAM215_c0_g1_i1	-0.876583	-0.0261638	0.654997	0.24775
CBV_PAM65973_c0_g1_i1	-0.831041	0.250101	0.69968	-0.11874
CBV_PAM28758_c1_g1_i1	-0.785393	0.0621813	0.793358	-0.0701455
CBV_PAM3699_c0_g1_i1	-0.840293	-0.101994	0.685981	0.256305
CBV_PAM26113_c0_g1_i1	-0.526651	-0.586592	0.616377	0.496866
CBV_PAM6915_c0_g1_i1	-0.660551	-0.441401	0.607303	0.494648
CBV_PAM55063_c0_g1_i1	-0.808165	0.268805	0.701042	-0.161682
CBV_PAM37347_c2_g1_i1	-0.927045	0.193983	0.561691	0.171371
CBV_PAM51511_c1_g1_i1	-0.845694	0.22445	0.686615	-0.0653711
CBV_PAM65859_c0_g1_i1	-0.766746	-0.286835	0.608934	0.444647
CBV_PAM19759_c0_g1_i1	-0.360685	-0.5246	0.91136	-0.0260746
CBV_PAM26043_c0_g1_i1	-0.647955	-0.365094	0.797457	0.215592
CBV_PAM74295_c0_g1_i1	-0.50042	-0.16687	0.938246	-0.270955
CBV_PAM69500_c0_g1_i1	-0.79047	-0.167657	0.722137	0.23599
CBV_PAM37642_c2_g2_i1	-0.320142	-0.320142	0.960427	-0.320142
CBV_PAM1579_c0_g1_i1	-0.569345	0.0648816	0.873919	-0.369455
CBV_PAM4106_c0_g1_i1	-0.910329	0.204308	0.58621	0.119811
CBV_PAM37696_c0_g1_i1	-0.920692	0.230825	0.556139	0.133728
CBV_PAM39227_c0_g1_i1	-0.680237	0.10723	0.82849	-0.255483
CBV_PAM63572_c0_g1_i1	-0.64219	-0.0534089	0.879698	-0.1841
CBV_PAM3012_c0_g1_i1	-0.734924	0.266023	0.732515	-0.263615
CBV_PAM57321_c0_g1_i1	-0.755205	0.399225	0.637453	-0.281474
CBV_PAM43106_c0_g1_i1	-0.641913	-0.309931	0.828811	0.123033
CBV_PAM25602_c0_g1_i1	-0.702385	0.239731	0.756799	-0.294145
CBV_PAM11423_c0_g1_i1	-0.504986	-0.117062	0.922332	-0.300285
CBV_PAM40680_c0_g1_i1	-0.835862	-0.142472	0.554412	0.423922
CBV_PAM18826_c0_g1_i1	-0.857217	-0.0500975	0.622145	0.28517
CBV_PAM4753_c0_g1_i1	-0.720767	-0.0511192	0.824975	-0.0530893
CBV_PAM40139_c0_g1_i1	-0.893995	0.167704	0.601962	0.124329
CBV_PAM52859_c0_g1_i1	-0.785715	0.00886287	0.76368	0.0131726
CBV_PAM28109_c1_g1_i1	-0.753563	-0.158028	0.765326	0.146265
CBV_PAM39826_c0_g1_i1	-0.720033	-0.0326297	0.821816	-0.0691539
CBV_PAM7573_c0_g1_i1	-0.705913	-0.0649579	0.83108	-0.0602091
CBV_PAM29731_c0_g1_i1	-0.880083	0.399258	0.511232	-0.0304084
CBV_PAM66261_c0_g1_i1	-0.897612	0.253653	0.563738	0.0802216
CBV_PAM4486_c0_g1_i1	-0.859027	-0.0299546	0.616095	0.272887
CBV_PAM38553_c1_g1_i1	-0.562462	-0.0586827	0.89285	-0.271706
CBV_PAM51508_c0_g1_i1	-0.929354	0.327544	0.438362	0.163448
CBV_PAM58284_c0_g1_i1	-0.916845	0.146902	0.508136	0.261808
CBV_PAM66457_c0_g1_i1	-0.834796	0.0757912	0.691336	0.0676697
CBV_PAM1138_c0_g1_i1	-0.746373	0.430964	0.600454	-0.285045
CBV_PAM65861_c0_g2_i1	-0.840974	0.470937	0.489845	-0.119808
CBV_PAM23837_c1_g1_i1	-0.561969	0.00249502	0.873615	-0.314141
CBV_PAM69081_c0_g1_i1	-0.749822	0.423057	0.600619	-0.273853
CBV_PAM11035_c0_g1_i1	-0.830354	-0.121928	0.567531	0.38475
CBV_PAM26317_c0_g1_i1	-0.791121	-0.0789591	0.715808	0.154272
CBV_PAM51120_c0_g1_i1	-0.900515	0.267876	0.521412	0.111227
CBV_PAM10837_c0_g1_i1	-0.690598	-0.221814	0.789001	0.123411
CBV_PAM55778_c0_g1_i1	-0.662237	0.00915667	0.830124	-0.177044
CBV_PAM65634_c0_g3_i1	-0.00135643	-0.438911	0.879179	-0.438911
CBV_PAM57032_c0_g1_i1	-0.701559	-0.209639	0.775474	0.135724
CBV_PAM1975_c0_g1_i1	-0.702952	-0.194926	0.77938	0.118499
CBV_PAM8277_c0_g1_i1	-0.839293	0.0453976	0.652434	0.141462
CBV_PAM38823_c0_g1_i1	-0.770347	0.0885276	0.738594	-0.056775
CBV_PAM64435_c0_g7_i1	-0.507607	-0.317256	0.885372	-0.0605088
CBV_PAM57963_c0_g1_i1	-0.613662	0.17919	0.783541	-0.349068
CBV_PAM2687_c0_g1_i1	-0.663343	-0.2163	0.804472	0.0751706
CBV_PAM18594_c0_g1_i1	-0.484306	-0.261877	0.899538	-0.153355
CBV_PAM25182_c0_g1_i1	-0.827595	-0.0841598	0.567647	0.344108
CBV_PAM2354_c2_g1_i1	-0.505819	-0.436661	0.819048	0.123432
CBV_PAM59422_c0_g1_i1	-0.712187	-0.20652	0.742404	0.176302
CBV_PAM12088_c0_g1_i1	-0.788223	-0.184729	0.524581	0.448371
CBV_PAM23939_c1_g1_i1	-0.765351	0.555923	0.43183	-0.222403
CBV_PAM7999_c0_g1_i1	-0.810068	0.0454411	0.681923	0.0827039
CBV_PAM14721_c0_g1_i1	-0.838355	0.0945612	0.636589	0.107205
CBV_PAM25441_c0_g1_i1	-0.67304	0.103819	0.784541	-0.21532
CBV_PAM23910_c1_g1_i1	-0.770142	0.405626	0.569576	-0.205059
CBV_PAM12411_c0_g1_i1	-0.531509	-0.342821	0.847129	0.0272016
CBV_PAM53667_c0_g1_i1	-0.512213	-0.464576	0.772184	0.204606
CBV_PAM11464_c0_g1_i1	-0.863454	0.141376	0.572636	0.149441
CBV_PAM29101_c0_g1_i1	-0.639542	-0.181661	0.820564	0.000639254
CBV_PAM17810_c0_g1_i1	-0.798624	-0.11831	0.599269	0.317665
CBV_PAM724_c2_g1_i1	-0.733398	0.0995916	0.742654	-0.108847
CBV_PAM3199_c0_g1_i1	-0.757902	-0.185611	0.637792	0.305721
CBV_PAM24778_c0_g1_i1	-0.760991	-0.118435	0.693668	0.185758
CBV_PAM41835_c0_g1_i1	-0.65063	-0.0473078	0.817607	-0.119669
CBV_PAM52202_c0_g1_i1	-0.871538	0.0812465	0.511985	0.278307
CBV_PAM52185_c0_g1_i1	-0.594243	0.185067	0.767846	-0.35867
CBV_PAM23614_c0_g2_i1	-0.673186	-0.245223	0.750576	0.167833
CBV_PAM2354_c0_g1_i1	-0.454585	-0.0552055	0.872524	-0.362734
CBV_PAM65913_c0_g1_i1	-0.816038	0.24134	0.613864	-0.0391665
CBV_PAM66633_c0_g1_i1	-0.640973	0.106572	0.784892	-0.25049
CBV_PAM3105_c1_g1_i1	-0.791002	-0.0219056	0.674522	0.138386
CBV_PAM13806_c0_g1_i1	-0.710641	-0.277442	0.603673	0.38441
CBV_PAM55010_c0_g1_i1	-0.670407	0.327495	0.660359	-0.317447
CBV_PAM52306_c0_g1_i1	-0.703363	-0.0279716	0.772189	-0.0408535
CBV_PAM51278_c1_g1_i1	-0.732636	-0.219067	0.642072	0.309632
CBV_PAM52536_c0_g1_i1	-0.728297	0.13023	0.724787	-0.12672
CBV_PAM69769_c0_g1_i1	-0.663235	-0.248278	0.748785	0.162728
CBV_PAM38015_c0_g1_i1	-0.796427	0.343188	0.568361	-0.115122
CBV_PAM51521_c0_g1_i1	-0.702223	0.0274798	0.765563	-0.0908193
CBV_PAM17412_c0_g1_i1	-0.419693	-0.14184	0.885711	-0.324178
CBV_PAM38808_c0_g1_i1	-0.854234	0.0712519	0.535809	0.247174
CBV_PAM31406_c0_g1_i1	-0.737238	-0.157196	0.682887	0.211547
CBV_PAM39078_c0_g1_i1	-0.694546	0.181278	0.720906	-0.207638
CBV_PAM26337_c0_g1_i1	-0.502284	-0.153697	0.867321	-0.21134
CBV_PAM39546_c0_g1_i1	-0.694373	-0.244296	0.681714	0.256954
CBV_PAM46103_c0_g1_i1	-0.731336	0.00403744	0.732965	-0.00566603
CBV_PAM17737_c0_g1_i1	-0.78766	-0.131683	0.536073	0.38327
CBV_PAM11637_c1_g1_i1	-0.717931	0.0294817	0.742415	-0.0539665
CBV_PAM5117_c0_g1_i1	-0.537528	-0.410061	0.754399	0.19319
CBV_PAM43735_c0_g1_i1	-0.81903	0.0727404	0.605982	0.140307
CBV_PAM2533_c0_g1_i1	-0.709493	0.0156764	0.745182	-0.0513653
CBV_PAM371_c0_g1_i1	-0.651531	0.158727	0.739811	-0.247007
CBV_PAM52718_c0_g1_i1	-0.809976	-0.0604263	0.529345	0.341057
CBV_PAM23865_c0_g1_i1	-0.70306	-0.248352	0.627105	0.324307
CBV_PAM55105_c0_g1_i1	-0.735673	-0.207368	0.581143	0.361898
CBV_PAM19100_c0_g1_i1	-0.672326	-0.15895	0.75449	0.0767855
CBV_PAM75069_c0_g1_i1	-0.722548	-0.148256	0.68913	0.181674
CBV_PAM58793_c0_g1_i1	-0.8427	0.123285	0.539864	0.17955
CBV_PAM40429_c0_g1_i1	-0.732382	0.463562	0.495055	-0.226235
CBV_PAM42521_c0_g1_i1	-0.658744	-0.0161547	0.775156	-0.100257
CBV_PAM43014_c0_g1_i1	-0.823164	0.0275689	0.553739	0.241856
CBV_PAM28203_c0_g1_i1	-0.562494	-0.390423	0.720662	0.232256
CBV_PAM67107_c0_g1_i1	-0.670109	-0.299891	0.606625	0.363375
CBV_PAM39185_c0_g1_i1	-0.293481	-0.293481	0.880444	-0.293481
CBV_PAM61358_c0_g1_i1	-0.775016	-0.10758	0.566078	0.316519
CBV_PAM2994_c0_g1_i1	-0.761705	0.0410034	0.669105	0.0515969
CBV_PAM38984_c0_g1_i1	-0.710611	0.288965	0.630918	-0.209272
CBV_PAM43336_c0_g1_i1	-0.751468	0.409406	0.515549	-0.173487
CBV_PAM6698_c0_g1_i1	-0.667386	-0.010114	0.75842	-0.0809207
CBV_PAM11086_c1_g1_i1	-0.436299	-0.485229	0.756729	0.164799
CBV_PAM38571_c1_g1_i1	-0.726505	0.422139	0.521303	-0.216936
CBV_PAM64570_c0_g1_i1	-0.751372	-0.165265	0.532614	0.384024
CBV_PAM17146_c0_g1_i1	-0.571438	-0.427262	0.586134	0.412566
CBV_PAM37799_c0_g1_i1	-0.612369	-0.381797	0.551845	0.442321
CBV_PAM65702_c0_g3_i1	-0.291551	-0.291551	0.874652	-0.291551
CBV_PAM47319_c0_g1_i1	-0.801479	-0.0361391	0.526204	0.311414
CBV_PAM52058_c1_g1_i1	-0.760736	-0.119965	0.573322	0.307378
CBV_PAM45373_c0_g1_i1	-0.646411	-0.251052	0.705801	0.191662
CBV_PAM13070_c0_g1_i1	-0.765867	0.270834	0.588344	-0.0933108
CBV_PAM47346_c0_g1_i1	-0.803046	-0.0378999	0.501233	0.339713
CBV_PAM57824_c0_g1_i1	-0.800665	0.243864	0.558488	-0.00168695
CBV_PAM5571_c0_g1_i1	-0.555724	-0.33942	0.751925	0.143219
CBV_PAM65387_c0_g1_i1	-0.685614	-0.236925	0.631456	0.291083
CBV_PAM74804_c0_g1_i1	-0.597765	-0.0767761	0.79471	-0.12017
CBV_PAM65926_c0_g1_i1	-0.708453	-0.118247	0.687861	0.138839
CBV_PAM42616_c0_g1_i1	-0.749851	-0.0438763	0.648276	0.145451
CBV_PAM18664_c0_g1_i1	-0.679711	0.113662	0.710677	-0.144627
CBV_PAM64163_c0_g1_i1	-0.754075	0.187725	0.627055	-0.0607049
CBV_PAM39185_c0_g5_i1	-0.516927	-0.413481	0.717869	0.21254
CBV_PAM24161_c0_g2_i1	-0.784706	0.440934	0.423996	-0.0802236
CBV_PAM884_c1_g1_i1	-0.685302	-0.245706	0.592261	0.338747
CBV_PAM6343_c0_g1_i1	-0.759602	0.0634552	0.641324	0.0548232
CBV_PAM66875_c1_g1_i1	-0.776651	-0.0077232	0.597215	0.18716
CBV_PAM42211_c0_g1_i1	-0.629739	0.237642	0.678221	-0.286125
CBV_PAM2042_c0_g1_i1	-0.529788	-0.30947	0.78355	0.0557074
CBV_PAM14688_c0_g1_i1	-0.757976	-0.00736454	0.632874	0.132467
CBV_PAM40609_c0_g1_i1	-0.694934	-0.135904	0.685431	0.145407
CBV_PAM7551_c0_g1_i1	-0.789376	0.0328947	0.57999	0.176492
CBV_PAM72379_c0_g1_i1	-0.744816	0.262819	0.593251	-0.111254
CBV_PAM38838_c0_g1_i1	-0.800365	0.368913	0.457271	-0.0258189
CBV_PAM42780_c0_g1_i1	-0.685248	-0.219212	0.62294	0.281521
CBV_PAM15839_c0_g1_i1	-0.386488	-0.189352	0.850345	-0.274505
CBV_PAM5185_c0_g1_i1	-0.773582	0.289667	0.545321	-0.0614062
CBV_PAM37290_c0_g1_i1	-0.824796	0.159111	0.498004	0.167681
CBV_PAM12625_c0_g1_i1	-0.610702	-0.0387903	0.769762	-0.12027
CBV_PAM52163_c0_g1_i1	-0.799045	0.202147	0.547394	0.0495041
CBV_PAM53225_c0_g1_i1	-0.651062	-0.164231	0.721657	0.0936358
CBV_PAM40721_c0_g1_i1	-0.767216	0.29289	0.547359	-0.0730327
CBV_PAM6052_c0_g1_i1	-0.57896	-0.398654	0.546782	0.430832
CBV_PAM41071_c0_g7_i1	-0.513725	0.111273	0.758508	-0.356056
CBV_PAM38905_c0_g1_i1	-0.789505	0.357572	0.473748	-0.0418149
CBV_PAM39245_c0_g1_i1	-0.651999	-0.023856	0.738131	-0.0622758
CBV_PAM17769_c0_g1_i1	-0.700689	0.235234	0.632405	-0.16695
CBV_PAM26094_c0_g1_i1	-0.809093	0.0659397	0.5081	0.235053
CBV_PAM68726_c0_g1_i1	-0.628022	0.124837	0.717063	-0.213878
CBV_PAM40650_c0_g1_i1	-0.642765	-0.255449	0.658651	0.239564
CBV_PAM33168_c0_g1_i1	-0.658615	0.295014	0.618772	-0.255171
CBV_PAM2190_c0_g1_i1	-0.781568	0.0550086	0.569833	0.156727
CBV_PAM54123_c0_g1_i1	-0.784875	0.0835017	0.565662	0.135711
CBV_PAM41778_c0_g1_i1	-0.760251	0.289445	0.539972	-0.0691667
CBV_PAM4136_c0_g1_i1	-0.575502	-0.307085	0.708522	0.174065
CBV_PAM28345_c0_g1_i1	-0.827089	0.149095	0.441016	0.236979
CBV_PAM18323_c0_g1_i1	-0.747709	-0.120141	0.492175	0.375675
CBV_PAM17377_c0_g1_i1	-0.523923	-0.386312	0.697577	0.212658
CBV_PAM10271_c0_g1_i1	-0.750477	-0.109937	0.499185	0.361229
CBV_PAM11259_c0_g1_i1	-0.529277	-0.400982	0.662093	0.268166
CBV_PAM44224_c0_g1_i1	-0.418572	-0.00578923	0.797162	-0.372801
CBV_PAM50750_c4_g1_i1	-0.590225	0.0293081	0.751162	-0.190245
CBV_PAM24626_c0_g1_i1	-0.666899	0.157168	0.672177	-0.162446
CBV_PAM48845_c0_g1_i1	-0.79827	0.140555	0.516006	0.14171
CBV_PAM20486_c0_g1_i1	-0.626774	-0.0694998	0.735579	-0.0393054
CBV_PAM19295_c0_g1_i1	-0.47228	-0.182492	0.810578	-0.155805
CBV_PAM72400_c0_g1_i1	-0.709913	-0.0680116	0.636852	0.141073
CBV_PAM37722_c1_g1_i1	-0.219346	-0.246485	0.830597	-0.364767
CBV_PAM10684_c2_g1_i1	-0.559283	-0.0704962	0.770588	-0.140809
CBV_PAM67533_c0_g1_i1	-0.794945	0.115366	0.504904	0.174674
CBV_PAM51566_c0_g1_i1	-0.593999	-0.075919	0.751799	-0.08188
CBV_PAM29700_c0_g1_i1	-0.794079	0.185334	0.503901	0.104845
CBV_PAM65077_c4_g1_i1	-0.518042	-0.325653	0.737459	0.106237
CBV_PAM26469_c0_g1_i1	-0.22923	-0.324223	0.8306	-0.277147
CBV_PAM26865_c0_g1_i1	-0.503178	0.0399449	0.761564	-0.298331
CBV_PAM16611_c0_g1_i1	-0.433276	-0.473615	0.675641	0.23125
CBV_PAM25148_c1_g1_i1	-0.795606	0.0752399	0.46933	0.251036
CBV_PAM37224_c0_g1_i1	-0.788901	0.372185	0.400948	0.0157685
CBV_PAM73759_c0_g1_i1	-0.656811	-0.00607106	0.698947	-0.0360657
CBV_PAM8063_c0_g1_i1	-0.73948	0.173452	0.586349	-0.0203202
CBV_PAM15482_c0_g1_i1	-0.550783	0.148547	0.707882	-0.305646
CBV_PAM28089_c0_g1_i1	-0.59692	0.482541	0.458342	-0.343963
CBV_PAM25638_c1_g1_i1	-0.680333	0.313528	0.562627	-0.195822
CBV_PAM17138_c0_g1_i1	-0.75426	-0.00183281	0.552415	0.203678
CBV_PAM72949_c0_g1_i1	-0.602518	0.0345753	0.724752	-0.15681
CBV_PAM53863_c0_g1_i1	-0.764317	0.277014	0.502215	-0.0149122
CBV_PAM688_c0_g1_i1	-0.78055	0.138462	0.51712	0.124967
CBV_PAM27408_c0_g1_i1	-0.474286	-0.426495	0.6669	0.233881
CBV_PAM21780_c0_g1_i1	-0.738719	0.122495	0.587	0.0292236
CBV_PAM11051_c0_g2_i1	-0.688079	0.0298763	0.656384	0.00181888
CBV_PAM38802_c0_g1_i1	-0.702222	0.266163	0.568493	-0.132434
CBV_PAM41423_c1_g1_i1	-0.601555	-0.138874	0.722175	0.0182544
CBV_PAM51453_c0_g1_i1	-0.184407	-0.57251	0.734416	0.022501
CBV_PAM23828_c0_g1_i1	-0.367424	-0.535377	0.641054	0.261747
CBV_PAM11113_c0_g1_i1	-0.728103	0.375865	0.465459	-0.113221
CBV_PAM66804_c0_g1_i1	-0.464297	0.014296	0.764823	-0.314822
CBV_PAM57740_c0_g1_i1	-0.477885	-0.299255	0.760905	0.0162348
CBV_PAM27346_c0_g1_i1	-0.555619	-0.382992	0.452554	0.486057
CBV_PAM64479_c0_g2_i1	-0.719021	-0.126699	0.473769	0.371951
CBV_PAM19393_c0_g1_i1	-0.716339	0.0569005	0.61291	0.0465288
CBV_PAM38407_c0_g1_i1	-0.650196	0.129659	0.659365	-0.138828
CBV_PAM14430_c0_g1_i1	-0.669064	0.0466511	0.664503	-0.0420902
CBV_PAM34581_c0_g1_i1	-0.74566	-0.0447028	0.499764	0.290599
CBV_PAM71972_c0_g1_i1	-0.569034	0.0557942	0.72124	-0.208
CBV_PAM15939_c0_g1_i1	-0.525961	0.0565408	0.734719	-0.265299
CBV_PAM52394_c0_g1_i1	-0.647657	0.0049657	0.684186	-0.041495
CBV_PAM54663_c0_g1_i1	-0.656938	0.0304457	0.673215	-0.0467233
CBV_PAM10797_c0_g1_i1	-0.700953	0.0448182	0.627219	0.0289155
CBV_PAM40270_c0_g1_i1	-0.427714	-0.42087	0.713597	0.134987
CBV_PAM4151_c0_g1_i1	-0.76063	0.146078	0.528095	0.0864564
CBV_PAM51582_c0_g1_i1	-0.73525	0.00607946	0.562775	0.166396
CBV_PAM9442_c0_g1_i1	-0.615094	0.0329564	0.699016	-0.116879
CBV_PAM16294_c0_g1_i1	-0.723809	-0.0758514	0.526018	0.273642
CBV_PAM2011_c0_g1_i1	-0.443224	-0.038937	0.772639	-0.290478
CBV_PAM5387_c0_g1_i1	-0.610559	0.223071	0.629216	-0.241728
CBV_PAM51100_c0_g1_i1	-0.688846	-0.0552971	0.614905	0.129238
CBV_PAM16259_c0_g1_i1	-0.71335	-0.0648093	0.542641	0.235518
CBV_PAM37936_c0_g1_i1	-0.605737	-0.289903	0.517893	0.377746
CBV_PAM24322_c1_g1_i1	-0.586379	-0.124123	0.705636	0.00486603
CBV_PAM12306_c0_g1_i1	-0.561732	-0.287962	0.642296	0.207399
CBV_PAM55049_c0_g1_i1	-0.5225	-0.216731	0.728219	0.0110117
CBV_PAM11082_c1_g1_i1	-0.663967	0.158981	0.61041	-0.105424
CBV_PAM54114_c1_g1_i1	-0.588897	0.113923	0.670899	-0.195925
CBV_PAM26215_c0_g1_i1	-0.323778	-0.463827	0.72357	0.0640349
CBV_PAM11998_c0_g1_i1	-0.708622	0.0420989	0.578072	0.0884506
CBV_PAM64289_c0_g1_i1	-0.629251	0.539742	0.322648	-0.233139
CBV_PAM11875_c0_g1_i1	-0.619964	-0.256089	0.509564	0.366489
CBV_PAM56693_c0_g1_i1	-0.643942	0.290398	0.551836	-0.198292
CBV_PAM13954_c0_g1_i1	-0.602065	-0.0385021	0.689841	-0.049274
CBV_PAM73734_c0_g1_i1	-0.652053	-0.194621	0.502843	0.343832
CBV_PAM40685_c1_g1_i1	-0.537283	-0.0448496	0.721179	-0.139046
CBV_PAM70493_c0_g1_i1	-0.456889	-0.0618666	0.750737	-0.231981
CBV_PAM28431_c0_g1_i1	-0.661258	0.133839	0.602544	-0.0751245
CBV_PAM26296_c0_g1_i1	-0.576173	-0.272932	0.592544	0.256561
CBV_PAM57063_c0_g1_i1	-0.430383	-0.0506164	0.750196	-0.269196
CBV_PAM43667_c0_g1_i1	-0.475434	-0.365931	0.652411	0.188955
CBV_PAM12363_c0_g1_i1	-0.59266	-0.0976929	0.677841	0.0125116
CBV_PAM13694_c0_g1_i1	-0.635478	-0.182656	0.562986	0.255148
CBV_PAM38647_c0_g1_i1	-0.0497555	-0.631942	0.645005	0.0366921
CBV_PAM4249_c0_g1_i1	-0.616162	-0.0291849	0.661766	-0.0164194
CBV_PAM12800_c0_g1_i1	-0.169736	-0.571926	0.676019	0.0656439
CBV_PAM76483_c0_g1_i1	-0.524667	-0.224582	0.698862	0.0503863
CBV_PAM579_c0_g1_i1	-0.686112	-0.0698797	0.534873	0.221119
CBV_PAM65470_c0_g14_i1	-0.422648	-0.422648	0.640592	0.204704
CBV_PAM11275_c0_g1_i1	-0.587529	0.0191602	0.671994	-0.103625
CBV_PAM71722_c0_g1_i1	-0.646335	0.0543614	0.617981	-0.0260076
CBV_PAM31180_c1_g1_i1	-0.630333	0.320584	0.511045	-0.201296
CBV_PAM46222_c0_g1_i1	-0.45048	-0.364511	0.661682	0.153309
CBV_PAM40769_c0_g1_i1	-0.65563	-0.0111304	0.591354	0.0754061
CBV_PAM65078_c2_g1_i1	-0.631377	-0.0855164	0.604092	0.112801
CBV_PAM57755_c0_g1_i1	-0.629063	-0.125403	0.586101	0.168364
CBV_PAM51321_c1_g1_i1	-0.743392	0.276533	0.379586	0.0872731
CBV_PAM11736_c1_g1_i1	-0.69754	0.0653335	0.52838	0.103827
CBV_PAM1911_c1_g1_i1	-0.640688	-0.040646	0.600618	0.0807153
CBV_PAM65507_c0_g1_i1	-0.647799	-0.0395457	0.590602	0.0967432
CBV_PAM47291_c0_g1_i1	-0.534434	-0.0589747	0.69225	-0.0988412
CBV_PAM50753_c0_g1_i1	-0.65655	0.186653	0.551702	-0.0818051
CBV_PAM13810_c0_g1_i1	-0.637692	-0.0192195	0.602023	0.0548889
CBV_PAM13209_c1_g9_i1	-0.253418	-0.253418	0.760253	-0.253418
CBV_PAM2872_c0_g1_i1	-0.550194	-0.303545	0.500467	0.353273
CBV_PAM59729_c0_g1_i1	-0.637367	0.0896606	0.593892	-0.0461858
CBV_PAM4016_c0_g1_i1	-0.606994	0.415424	0.419474	-0.227904
CBV_PAM69655_c1_g1_i1	-0.590498	-0.154672	0.609782	0.135388
CBV_PAM37201_c3_g1_i1	-0.712422	0.106346	0.475504	0.130573
CBV_PAM64435_c0_g5_i1	-0.313626	-0.192767	0.751429	-0.245036
CBV_PAM61739_c1_g1_i1	-0.603855	0.0144511	0.622307	-0.0329031
CBV_PAM51647_c0_g1_i1	-0.559869	0.0164816	0.652043	-0.108656
CBV_PAM66670_c2_g1_i1	-0.639504	0.502741	0.267677	-0.130915
CBV_PAM32664_c0_g1_i1	-0.555344	0.0162069	0.654519	-0.115383
CBV_PAM66348_c0_g1_i1	-0.609548	-0.0464985	0.608597	0.0474497
CBV_PAM65064_c0_g1_i1	-0.647239	-0.059463	0.541094	0.165608
CBV_PAM1914_c0_g1_i1	-0.694917	0.329521	0.387071	-0.0216742
CBV_PAM567_c0_g1_i1	-0.561379	-0.0754099	0.648103	-0.0113146
CBV_PAM46579_c0_g1_i1	-0.640549	-0.125055	0.487391	0.278213
CBV_PAM66339_c1_g5_i1	-0.412848	-0.412848	0.583068	0.242628
CBV_PAM10712_c1_g1_i1	-0.561194	0.215754	0.571066	-0.225626
CBV_PAM26935_c0_g1_i1	-0.679139	0.0537975	0.510695	0.114647
CBV_PAM8708_c0_g1_i1	-0.545112	0.0303285	0.649074	-0.13429
CBV_PAM38242_c0_g1_i1	-0.588619	-0.0799862	0.617703	0.050903
CBV_PAM59296_c0_g1_i1	-0.408656	-0.361334	0.650832	0.119158
CBV_PAM27232_c0_g1_i1	-0.576142	-0.173004	0.588544	0.160601
CBV_PAM66068_c0_g1_i1	-0.545717	0.195224	0.583576	-0.233083
CBV_PAM10660_c0_g1_i1	-0.592478	0.274223	0.513931	-0.195676
CBV_PAM70607_c0_g1_i1	-0.715237	0.148278	0.410395	0.156564
CBV_PAM52372_c0_g1_i1	-0.245583	-0.245583	0.73675	-0.245583
CBV_PAM10227_c0_g17_i1	-0.36752	0.0647797	0.670259	-0.36752
CBV_PAM38286_c0_g1_i1	-0.666058	-0.038775	0.473324	0.231509
CBV_PAM10488_c0_g1_i1	-0.705138	0.159233	0.432617	0.113287
CBV_PAM25442_c0_g1_i1	-0.689184	0.14771	0.466995	0.0744786
CBV_PAM71990_c0_g1_i1	-0.674967	0.0847996	0.493354	0.0968133
CBV_PAM55964_c0_g1_i1	-0.482158	-0.122934	0.679869	-0.0747773
CBV_PAM10724_c0_g1_i1	-0.600792	-0.0630139	0.586862	0.0769438
CBV_PAM67706_c0_g1_i1	-0.499666	0.118773	0.624999	-0.244106
CBV_PAM64134_c1_g1_i1	-0.643954	0.328862	0.419864	-0.104772
CBV_PAM65079_c0_g5_i1	0.0188191	-0.542338	0.63395	-0.110431
CBV_PAM29092_c0_g1_i1	-0.648638	0.159494	0.508621	-0.0194766
CBV_PAM753_c2_g1_i1	-0.365154	-0.158702	0.71244	-0.188583
CBV_PAM7004_c0_g1_i1	-0.508117	-0.283195	0.553209	0.238103
CBV_PAM47582_c0_g1_i1	-0.472129	0.0482197	0.650816	-0.226907
CBV_PAM67846_c0_g1_i1	-0.659448	0.0595692	0.502221	0.0976583
CBV_PAM44400_c0_g1_i1	-0.47125	-0.133861	0.674765	-0.0696543
CBV_PAM30201_c0_g1_i1	-0.361973	-0.0838129	0.703151	-0.257366
CBV_PAM38887_c0_g1_i1	-0.629598	0.0810097	0.541966	0.00662221
CBV_PAM24980_c0_g1_i1	-0.702893	0.100482	0.375718	0.226694
CBV_PAM24093_c0_g1_i1	-0.462286	-0.336331	0.556378	0.242239
CBV_PAM10600_c0_g1_i1	-0.66359	0.120578	0.484865	0.0581472
CBV_PAM53787_c1_g1_i1	-0.606004	0.118738	0.553805	-0.0665398
CBV_PAM3334_c0_g1_i1	-0.589391	-0.164663	0.506412	0.247641
CBV_PAM1608_c0_g1_i1	-0.613965	0.31117	0.445043	-0.142249
CBV_PAM26877_c0_g1_i1	-0.646144	-0.0691359	0.440599	0.274682
CBV_PAM52930_c0_g1_i1	-0.583068	-0.0388235	0.590834	0.0310572
CBV_PAM51284_c1_g1_i1	-0.592984	0.333409	0.440433	-0.180858
CBV_PAM64633_c0_g1_i1	-0.678113	0.0316651	0.41837	0.228077
CBV_PAM52550_c0_g3_i1	-0.239149	-0.239149	0.717448	-0.239149
CBV_PAM27364_c0_g1_i1	-0.453139	0.0423169	0.648346	-0.237524
CBV_PAM51551_c0_g1_i1	-0.556987	0.196143	0.536809	-0.175966
CBV_PAM16527_c0_g1_i1	-0.5749	-0.0311466	0.578774	0.0272719
CBV_PAM47448_c0_g1_i1	-0.449427	-0.26369	0.621509	0.0916076
CBV_PAM51912_c1_g1_i1	-0.631443	0.148682	0.495012	-0.0122504
CBV_PAM41701_c0_g1_i1	-0.478305	-0.231841	0.611117	0.0990284
CBV_PAM3026_c0_g1_i1	-0.649697	0.151208	0.465274	0.0332154
CBV_PAM18500_c0_g2_i1	-0.647328	0.088048	0.47828	0.0809999
CBV_PAM43903_c0_g1_i1	-0.659853	0.123955	0.450816	0.0850816
CBV_PAM16602_c0_g1_i1	-0.529282	-0.203506	0.539323	0.193465
CBV_PAM37311_c1_g1_i1	-0.166341	-0.306678	0.692049	-0.219029
CBV_PAM38160_c1_g1_i1	-0.54925	0.111636	0.563649	-0.126035
CBV_PAM60479_c0_g1_i1	-0.481633	-0.0364252	0.632973	-0.114915
CBV_PAM66218_c0_g4_i1	-0.653832	0.18396	0.423081	0.046791
CBV_PAM67725_c0_g1_i1	-0.165882	-0.55159	0.515541	0.20193
CBV_PAM30101_c0_g1_i1	-0.273547	-0.438807	0.592791	0.119563
CBV_PAM26166_c0_g1_i1	-0.647206	0.0698966	0.42487	0.152439
CBV_PAM65569_c0_g1_i1	-0.249653	-0.383419	0.646189	-0.0131176
CBV_PAM69577_c0_g1_i1	-0.331982	-0.359626	0.616132	0.0754759
CBV_PAM564_c0_g1_i1	-0.663371	0.130989	0.372373	0.160009
CBV_PAM39483_c0_g1_i1	-0.623252	-0.0378436	0.4112	0.249896
CBV_PAM67382_c0_g1_i1	-0.508239	-0.195782	0.546477	0.157543
CBV_PAM1322_c0_g1_i1	-0.621692	0.0160436	0.448781	0.156868
CBV_PAM56454_c0_g1_i1	-0.536505	0.268018	0.461884	-0.193397
CBV_PAM25617_c0_g1_i1	-0.409252	-0.346092	0.506284	0.24906
CBV_PAM55538_c0_g2_i1	-0.309537	-0.0231454	0.642219	-0.309537
CBV_PAM65390_c0_g1_i1	-0.580187	-0.0849141	0.471429	0.193673
CBV_PAM55053_c0_g1_i1	-0.407163	-0.168328	0.627879	-0.0523886
CBV_PAM50952_c1_g1_i1	-0.42478	-0.321602	0.492139	0.254242
CBV_PAM42630_c0_g1_i1	-0.443719	0.0998377	0.574514	-0.230633
CBV_PAM57361_c0_g1_i1	-0.532689	0.0218092	0.55044	-0.0395598
CBV_PAM24747_c1_g1_i1	-0.598572	-0.0534934	0.403345	0.24872
CBV_PAM65582_c0_g1_i1	-0.358375	-0.359603	0.545299	0.172679
CBV_PAM12079_c0_g1_i1	-0.36111	-0.362268	0.529067	0.19431
CBV_PAM14571_c0_g1_i1	-0.554674	-0.143045	0.407556	0.290163
CBV_PAM50850_c0_g1_i1	-0.578335	0.00135643	0.484851	0.092127
CBV_PAM37627_c0_g1_i1	-0.259728	-0.201334	0.656097	-0.195036
CBV_PAM11665_c0_g1_i1	-0.605771	0.158678	0.426463	0.0206305
CBV_PAM12513_c0_g1_i1	-0.587972	0.040359	0.468953	0.0786605
CBV_PAM14007_c0_g1_i1	-0.575625	-0.0534956	0.455403	0.173718
CBV_PAM25565_c0_g1_i1	-0.575795	0.0898623	0.478139	0.0077931
CBV_PAM16637_c0_g1_i1	-0.430485	-0.0887485	0.606202	-0.0869693
CBV_PAM24653_c0_g1_i1	-0.616154	0.0429844	0.389833	0.183336
CBV_PAM25200_c0_g1_i1	-0.618971	0.0706447	0.392351	0.155975
CBV_PAM24327_c0_g1_i1	-0.607117	0.190956	0.401355	0.0148049
CBV_PAM65328_c0_g1_i1	-0.58038	0.286821	0.372531	-0.0789719
CBV_PAM24121_c0_g1_i1	-0.427377	0.050727	0.58062	-0.20397
CBV_PAM68490_c0_g1_i1	-0.405793	-0.01646	0.60376	-0.181507
CBV_PAM66614_c0_g1_i1	-0.460372	-0.246552	0.485936	0.220987
CBV_PAM182_c0_g1_i1	-0.472819	-0.0842573	0.568296	-0.0112191
CBV_PAM20207_c0_g1_i1	-0.4227	-0.277565	0.509906	0.190359
CBV_PAM10742_c1_g1_i1	-0.592402	0.274648	0.351736	-0.0339832
CBV_PAM40101_c0_g1_i1	-0.195233	-0.453313	0.543113	0.105432
CBV_PAM31549_c0_g1_i1	-0.400876	-0.0898694	0.605686	-0.11494
CBV_PAM10242_c0_g1_i1	-0.392909	-0.262981	0.559008	0.0968819
CBV_PAM65702_c0_g6_i1	-0.610582	0.252992	0.327946	0.0296432
CBV_PAM33326_c0_g1_i1	-0.436099	-0.184049	0.563437	0.0567102
CBV_PAM64216_c4_g1_i1	-0.520619	-0.0856766	0.502967	0.103329
CBV_PAM37660_c0_g1_i1	-0.609581	0.247039	0.327509	0.0350329
CBV_PAM43205_c1_g1_i1	-0.442921	-0.0259975	0.571915	-0.102996
CBV_PAM40868_c0_g1_i1	-0.580447	0.0706033	0.430012	0.0798316
CBV_PAM11284_c2_g1_i1	-0.463168	0.0782758	0.535085	-0.150194
CBV_PAM39896_c0_g1_i1	-0.369593	-0.171983	0.597085	-0.0555094
CBV_PAM24011_c0_g1_i1	-0.443906	-0.241129	0.454675	0.23036
CBV_PAM54817_c0_g1_i1	-0.403739	-0.0537509	0.57603	-0.11854
CBV_PAM37320_c0_g1_i1	-0.580293	0.0161004	0.361672	0.20252
CBV_PAM38565_c1_g1_i1	-0.566142	0.141561	0.409306	0.0152744
CBV_PAM12148_c0_g1_i1	-0.554754	0.115819	0.426292	0.012643
CBV_PAM12542_c0_g1_i1	-0.45297	0.260379	0.421197	-0.228606
CBV_PAM38053_c0_g1_i1	-0.465725	0.0412631	0.522548	-0.0980859
CBV_PAM51363_c1_g1_i1	-0.508802	0.0923814	0.471548	-0.0551281
CBV_PAM64771_c1_g1_i1	-0.541646	-0.0644335	0.372049	0.234031
CBV_PAM10327_c0_g1_i1	-0.576036	0.200214	0.342924	0.0328973
CBV_PAM58661_c0_g1_i1	-0.316954	-0.128123	0.592861	-0.147784
CBV_PAM12201_c1_g1_i1	-0.548648	0.109867	0.412488	0.0262928
CBV_PAM24350_c1_g1_i1	-0.56438	0.094641	0.379584	0.0901554
CBV_PAM64598_c0_g1_i1	-0.554413	0.0974544	0.397901	0.0590576
CBV_PAM50970_c0_g1_i1	-0.475132	-0.143853	0.449904	0.169081
CBV_PAM21390_c0_g1_i1	-0.48109	-0.0844702	0.481409	0.0841512
CBV_PAM13296_c0_g1_i1	-0.481562	-0.0457614	0.487962	0.0393613
CBV_PAM10888_c0_g1_i1	-0.51605	-0.0450337	0.430175	0.130909
CBV_PAM17391_c0_g1_i1	-0.464991	-0.106718	0.481794	0.0899141
CBV_PAM10397_c0_g1_i1	-0.432235	-0.136268	0.497716	0.0707873
CBV_PAM27337_c0_g1_i1	-0.450957	0.101564	0.476213	-0.126819
CBV_PAM64480_c0_g1_i1	-0.00443274	-0.43314	0.507782	-0.0702098
CBV_PAM23790_c1_g1_i1	-0.385066	-0.0933625	0.5383	-0.0598715
CBV_PAM67733_c0_g1_i1	-0.534262	-0.00187474	0.361772	0.174365
CBV_PAM10748_c0_g1_i1	-0.420285	0.193424	0.434666	-0.207806
CBV_PAM10176_c1_g1_i1	-0.472358	0.190137	0.407667	-0.125446
CBV_PAM10326_c1_g1_i1	-0.499471	0.0816325	0.428738	-0.0108993
CBV_PAM3636_c0_g1_i1	-0.519813	0.0812039	0.393544	0.0450644
CBV_PAM18539_c0_g1_i1	-0.458791	-0.109769	0.44017	0.128389
CBV_PAM15923_c0_g1_i1	-0.440819	0.0430908	0.475672	-0.0779443
CBV_PAM32798_c0_g1_i1	-0.306685	-0.0690576	0.546881	-0.171138
CBV_PAM51027_c0_g1_i1	-0.31571	-0.214778	0.52762	0.00286746
CBV_PAM67918_c0_g1_i1	-0.407179	-0.102765	0.49729	0.0126542
CBV_PAM41446_c0_g1_i1	-0.500405	0.131197	0.387868	-0.01866
CBV_PAM10324_c0_g1_i1	-0.501791	0.0294845	0.395538	0.0767688
CBV_PAM39718_c0_g1_i1	-0.489212	-0.0736974	0.349538	0.213372
CBV_PAM11303_c0_g1_i1	-0.0886411	-0.442691	0.44613	0.0852017
CBV_PAM37875_c0_g1_i1	-0.352582	-0.0349786	0.515715	-0.128155
CBV_PAM2967_c0_g1_i1	-0.479363	-0.0793983	0.363373	0.195389
CBV_PAM55835_c0_g1_i1	-0.329057	-0.0707581	0.520065	-0.120251
CBV_PAM65224_c0_g1_i1	-0.49075	-0.0351668	0.33681	0.189107
CBV_PAM23721_c1_g1_i1	-0.468016	0.084066	0.402085	-0.018135
CBV_PAM24712_c0_g1_i1	-0.501053	0.0119748	0.334025	0.155053
CBV_PAM18220_c0_g1_i1	-0.259469	-0.124577	0.524615	-0.140569
CBV_PAM51228_c0_g2_i1	-0.358136	-0.223796	0.40264	0.179291
CBV_PAM73196_c0_g1_i1	-0.385288	0.0274274	0.456596	-0.0987362
CBV_PAM37466_c0_g1_i1	-0.476052	0.175029	0.328796	-0.0277723
CBV_PAM24400_c0_g1_i1	-0.420202	-0.0439095	0.420944	0.043168
CBV_PAM37511_c1_g1_i1	-0.479041	0.121459	0.335711	0.0218709
CBV_PAM72424_c0_g1_i1	-0.360925	0.114403	0.426181	-0.179659
CBV_PAM64152_c0_g1_i1	-0.473448	0.0929682	0.35143	0.0290495
CBV_PAM64128_c0_g1_i1	-0.460292	0.0158405	0.367821	0.0766301
CBV_PAM37291_c0_g1_i1	-0.416779	0.310261	0.250143	-0.143625
CBV_PAM1202_c0_g1_i1	-0.254012	-0.175083	0.496189	-0.0670931
CBV_PAM10997_c0_g1_i1	-0.434861	0.198238	0.324114	-0.0874911
CBV_PAM1958_c0_g1_i1	-0.459903	0.12639	0.324138	0.00937582
CBV_PAM31260_c0_g1_i1	-0.302046	0.0502284	0.445496	-0.193678
CBV_PAM38067_c0_g1_i1	-0.473744	0.099678	0.299602	0.074465
CBV_PAM52029_c0_g1_i1	-0.397808	0.116818	0.383176	-0.102186
CBV_PAM37197_c0_g1_i1	-0.431569	0.0063673	0.347641	0.0775608
CBV_PAM51022_c0_g1_i1	-0.394147	0.0318842	0.37527	-0.0130079
CBV_PAM65236_c0_g1_i1	-0.383507	-0.0930455	0.333217	0.143335
CBV_PAM64339_c0_g1_i1	-0.376374	0.214336	0.275233	-0.113195
CBV_PAM10230_c0_g1_i1	-0.324751	0.0314431	0.373732	-0.0804243
CBV_PAM64842_c0_g1_i1	-0.364371	0.0304465	0.330348	0.00357579
CBV_PAM10181_c1_g1_i1	-0.366897	0.185648	0.257236	-0.0759866
CBV_PAM37190_c0_g1_i1	-0.376453	0.116418	0.28756	-0.0275247

## Sheet: Subcluster2
Additional file 6. Expression subcluster matrix. Values of Trinity gene expression (TPM-TMM) for 15 subclusters identified by gene expression cluster analysis during fruit developmental stages (150, 240, 300 and 390 days after fruit set; DAFS) in Persea americana cv. Hass.
Trinity genes	150-DAFS	240-DAFS	300-DAFS	390-DAFS
CBV_PAM38683_c0_g1_i1	1.88503	1.68705	-3.20536	-0.366715
CBV_PAM29471_c0_g1_i1	2.1531	1.53105	-2.21811	-1.46604
CBV_PAM18149_c0_g1_i1	2.79327	0.543994	-2.05886	-1.27841
CBV_PAM64400_c1_g1_i1	2.07002	0.765533	-2.94521	0.109654
CBV_PAM17537_c0_g1_i1	2.72907	0.469472	-1.80751	-1.39103
CBV_PAM32864_c0_g1_i1	2.77308	0.265615	-1.8819	-1.15679
CBV_PAM11651_c0_g1_i1	2.79321	0.154534	-1.87681	-1.07094
CBV_PAM52690_c1_g1_i1	2.55318	0.723676	-1.73752	-1.53934
CBV_PAM50807_c0_g8_i1	2.24811	1.14349	-2.04955	-1.34205
CBV_PAM51312_c0_g1_i1	2.31548	0.333788	-2.51592	-0.13335
CBV_PAM38807_c0_g1_i1	2.37637	0.838699	-1.85234	-1.36274
CBV_PAM997_c0_g1_i1	2.22057	0.979405	-2.00779	-1.19219
CBV_PAM64678_c1_g1_i1	2.29767	0.692856	-2.15791	-0.832621
CBV_PAM10396_c0_g1_i1	2.35256	0.740814	-1.82753	-1.26584
CBV_PAM2420_c0_g1_i1	1.8362	1.44976	-1.85831	-1.42766
CBV_PAM43905_c0_g1_i1	1.67052	1.60797	-1.91132	-1.36717
CBV_PAM10508_c0_g9_i1	1.58376	1.63836	-1.15245	-2.06967
CBV_PAM43844_c0_g1_i1	2.0005	1.20202	-1.30499	-1.89753
CBV_PAM37915_c0_g1_i1	2.59848	0.0794208	-1.4373	-1.24059
CBV_PAM72074_c0_g1_i1	2.42997	0.439927	-1.52325	-1.34665
CBV_PAM3826_c0_g1_i1	2.64314	-0.23973	-1.58544	-0.817967
CBV_PAM50807_c0_g4_i1	2.12073	0.898191	-1.81336	-1.20556
CBV_PAM26417_c0_g1_i1	2.56255	0.0316028	-1.38183	-1.21232
CBV_PAM23699_c1_g1_i1	1.68103	1.44977	-1.74394	-1.38686
CBV_PAM20501_c0_g1_i1	1.55968	1.51388	-1.81178	-1.26179
CBV_PAM64727_c0_g1_i1	2.67699	-0.892331	-0.892331	-0.892331
CBV_PAM50684_c1_g1_i1	1.95427	0.995279	-1.43813	-1.51142
CBV_PAM38522_c0_g2_i1	1.54764	1.43006	-1.68013	-1.29757
CBV_PAM52436_c1_g1_i1	1.78389	1.14765	-1.35421	-1.57733
CBV_PAM37041_c0_g1_i1	1.71616	1.0551	-0.766518	-2.00474
CBV_PAM52436_c2_g1_i1	2.29837	0.12735	-1.66704	-0.758683
CBV_PAM38522_c0_g1_i1	1.54981	1.35753	-1.5636	-1.34374
CBV_PAM55724_c1_g1_i1	2.20849	0.384328	-1.25784	-1.33498
CBV_PAM17197_c0_g1_i1	1.90504	0.879798	-1.26645	-1.51839
CBV_PAM47439_c0_g1_i1	2.10937	0.482903	-1.58427	-1.008
CBV_PAM42874_c0_g1_i1	1.95367	0.733238	-1.6158	-1.07111
CBV_PAM18150_c0_g1_i1	1.73236	1.06209	-1.21422	-1.58023
CBV_PAM56993_c0_g1_i1	1.89833	0.816772	-1.21332	-1.50178
CBV_PAM51425_c0_g1_i1	1.32981	1.47179	-1.53296	-1.26864
CBV_PAM65163_c2_g4_i1	1.76398	0.929083	-1.44847	-1.24459
CBV_PAM24089_c0_g1_i1	2.05753	0.438061	-1.21834	-1.27725
CBV_PAM842_c0_g2_i1	2.36181	-0.78727	-0.78727	-0.78727
CBV_PAM51229_c0_g1_i1	1.42042	1.27314	-1.15613	-1.53743
CBV_PAM50755_c1_g1_i1	1.58257	1.0688	-1.16353	-1.48784
CBV_PAM11271_c0_g1_i1	2.04976	0.261237	-1.325	-0.985994
CBV_PAM10936_c0_g1_i1	1.74636	0.789811	-1.35301	-1.18316
CBV_PAM25189_c0_g1_i1	1.77374	0.728445	-1.18306	-1.31912
CBV_PAM13335_c0_g1_i1	2.14028	-0.0821827	-1.13358	-0.924523
CBV_PAM12865_c0_g1_i1	2.16761	-0.169822	-0.998894	-0.998894
CBV_PAM13167_c0_g1_i1	2.17559	-0.239445	-0.804263	-1.13188
CBV_PAM41921_c0_g1_i1	2.00533	0.241754	-1.32183	-0.925248
CBV_PAM50807_c0_g6_i1	1.68419	0.756981	-1.44432	-0.996845
CBV_PAM60698_c0_g1_i1	1.22045	1.30716	-1.40892	-1.11869
CBV_PAM64473_c0_g1_i1	1.58996	0.737969	-1.73433	-0.593602
CBV_PAM37239_c1_g1_i1	1.9837	0.215098	-0.981282	-1.21752
CBV_PAM1062_c0_g1_i1	1.72243	0.685465	-1.08045	-1.32745
CBV_PAM12094_c0_g5_i1	1.7139	0.611073	-0.89364	-1.43133
CBV_PAM1667_c0_g1_i1	1.75581	0.53223	-1.41101	-0.877033
CBV_PAM67061_c0_g3_i1	1.98639	0.0196502	-0.828994	-1.17705
CBV_PAM48542_c0_g1_i1	1.37769	0.996669	-0.797149	-1.57721
CBV_PAM2731_c0_g1_i1	1.72029	0.586461	-1.12263	-1.18412
CBV_PAM10235_c1_g1_i1	1.74667	0.532062	-1.05489	-1.22384
CBV_PAM25552_c0_g1_i1	1.1026	1.31794	-1.13178	-1.28876
CBV_PAM54685_c0_g1_i1	1.72166	0.503011	-1.37249	-0.852186
CBV_PAM50807_c0_g1_i1	1.65311	0.615914	-1.38078	-0.888235
CBV_PAM74911_c0_g1_i1	1.46087	0.865799	-0.902543	-1.42413
CBV_PAM64803_c2_g1_i1	1.3541	1.00862	-1.13829	-1.22443
CBV_PAM43441_c0_g1_i1	1.54625	0.745467	-1.23056	-1.06116
CBV_PAM21011_c0_g1_i1	1.53146	0.761022	-1.115	-1.17749
CBV_PAM21201_c0_g1_i1	1.49409	0.773704	-1.2348	-1.033
CBV_PAM3709_c0_g1_i1	1.57408	0.636758	-0.887041	-1.3238
CBV_PAM10390_c0_g1_i1	1.32364	0.934398	-1.38471	-0.873325
CBV_PAM13551_c0_g1_i1	1.73467	0.307256	-1.2147	-0.827222
CBV_PAM53630_c0_g1_i1	1.36487	0.847996	-1.44321	-0.769658
CBV_PAM50807_c0_g3_i1	1.6234	0.532741	-1.13252	-1.02362
CBV_PAM12271_c0_g1_i1	1.71185	0.375097	-1.02987	-1.05708
CBV_PAM12819_c0_g1_i1	1.52968	0.679805	-1.12894	-1.08054
CBV_PAM11623_c0_g3_i1	0.985733	1.29318	-1.13945	-1.13945
CBV_PAM37659_c1_g1_i1	1.25394	0.771351	-1.72681	-0.298484
CBV_PAM26141_c1_g1_i1	1.18288	1.09102	-1.03653	-1.23737
CBV_PAM27457_c0_g1_i1	1.46421	0.753772	-1.08404	-1.13394
CBV_PAM39822_c0_g1_i1	1.35928	0.845388	-0.833559	-1.37111
CBV_PAM37432_c0_g1_i1	1.59458	0.527045	-1.04379	-1.07784
CBV_PAM31762_c0_g1_i1	1.82104	0.0394696	-0.930256	-0.930256
CBV_PAM26507_c0_g1_i1	1.13699	1.04862	-1.30294	-0.882676
CBV_PAM10487_c0_g1_i1	1.21539	0.963728	-1.25029	-0.928827
CBV_PAM53563_c0_g1_i1	1.77923	0.0340426	-0.827923	-0.985353
CBV_PAM73237_c0_g1_i1	1.70928	0.18796	-0.840716	-1.05652
CBV_PAM27307_c0_g1_i1	1.81424	-0.130719	-0.715477	-0.968041
CBV_PAM56354_c0_g1_i1	1.66817	0.229594	-1.10621	-0.791552
CBV_PAM12094_c0_g2_i1	1.31206	0.81776	-1.00688	-1.12294
CBV_PAM52741_c1_g1_i1	1.30638	0.8222	-1.08088	-1.0477
CBV_PAM651_c1_g1_i1	1.13859	1.00776	-0.946293	-1.20005
CBV_PAM67663_c0_g1_i1	1.80907	-0.190896	-0.725251	-0.892925
CBV_PAM11299_c0_g1_i1	1.48602	0.529265	-1.17092	-0.844372
CBV_PAM51169_c0_g1_i1	1.72309	0.0483755	-0.960284	-0.81118
CBV_PAM53444_c0_g1_i1	0.999439	1.12229	-0.993325	-1.1284
CBV_PAM54223_c0_g1_i1	1.35682	0.699551	-1.18014	-0.876229
CBV_PAM13951_c0_g1_i1	1.54891	0.346321	-1.24329	-0.651942
CBV_PAM11320_c0_g1_i1	1.44038	0.569248	-1.15633	-0.853295
CBV_PAM11849_c0_g1_i1	1.02414	1.08148	-1.161	-0.944613
CBV_PAM63542_c0_g1_i1	1.7327	-0.046411	-0.843146	-0.843146
CBV_PAM12094_c0_g1_i1	1.23438	0.845697	-1.04004	-1.04004
CBV_PAM50701_c0_g1_i1	1.3348	0.695843	-0.885885	-1.14476
CBV_PAM27195_c0_g1_i1	1.50264	0.369403	-0.615374	-1.25667
CBV_PAM25376_c0_g1_i1	1.39747	0.56118	-0.71777	-1.24088
CBV_PAM66344_c0_g1_i1	1.39498	0.601874	-1.09025	-0.9066
CBV_PAM28523_c0_g1_i1	1.44668	0.520957	-1.04893	-0.918708
CBV_PAM26725_c0_g1_i1	1.24408	0.796925	-1.0205	-1.0205
CBV_PAM13230_c0_g1_i1	1.59808	0.121323	-1.18965	-0.529752
CBV_PAM4920_c0_g1_i1	1.68808	-0.00650964	-0.832008	-0.849562
CBV_PAM42015_c0_g1_i1	1.50881	0.37151	-0.760007	-1.12031
CBV_PAM50887_c0_g1_i1	1.36256	0.552598	-1.30585	-0.609311
CBV_PAM38792_c0_g1_i1	0.859927	1.18372	-1.05319	-0.990458
CBV_PAM27754_c0_g1_i1	1.67057	0.017169	-0.866265	-0.821477
CBV_PAM33059_c0_g1_i1	1.0116	1.02798	-0.860968	-1.17861
CBV_PAM51717_c0_g1_i1	1.41892	0.504095	-1.16723	-0.755787
CBV_PAM23830_c1_g2_i1	1.31743	-0.0273846	-1.53833	0.248283
CBV_PAM27411_c1_g1_i1	0.9637	1.05834	-0.960573	-1.06147
CBV_PAM24463_c0_g1_i1	1.19637	0.748138	-1.29987	-0.644646
CBV_PAM29561_c0_g1_i1	1.2092	0.785896	-0.893507	-1.10159
CBV_PAM15781_c0_g1_i1	1.16988	0.823332	-0.856446	-1.13676
CBV_PAM13000_c0_g1_i1	1.26676	0.687953	-1.15329	-0.801425
CBV_PAM11481_c1_g1_i1	1.12245	0.849403	-0.746306	-1.22555
CBV_PAM37401_c2_g1_i1	1.67442	-0.237199	-0.980114	-0.457106
CBV_PAM28747_c0_g1_i1	1.45099	0.386633	-0.824909	-1.01272
CBV_PAM9526_c0_g1_i1	1.57746	0.107597	-0.781298	-0.903755
CBV_PAM65041_c1_g2_i1	1.09178	0.869308	-0.835109	-1.12598
CBV_PAM51436_c0_g1_i1	1.52453	0.178862	-1.03529	-0.668102
CBV_PAM28818_c0_g1_i1	1.24089	0.683195	-1.04205	-0.882039
CBV_PAM24861_c0_g7_i1	1.53201	-0.0945385	-1.20792	-0.229556
CBV_PAM10561_c0_g1_i1	1.35594	0.421417	-0.521846	-1.25552
CBV_PAM39640_c1_g1_i1	1.38947	0.445871	-0.807668	-1.02767
CBV_PAM37693_c0_g1_i1	1.43742	0.335335	-0.7537	-1.01906
CBV_PAM273_c1_g1_i1	1.37279	0.459514	-0.966846	-0.865455
CBV_PAM11472_c1_g1_i1	1.48475	0.237273	-0.7807	-0.941327
CBV_PAM5778_c0_g1_i1	1.28189	0.578345	-0.780914	-1.07932
CBV_PAM68266_c0_g1_i1	0.97972	0.904213	-1.22641	-0.657522
CBV_PAM55336_c0_g1_i1	1.32823	0.497648	-0.916553	-0.909326
CBV_PAM6212_c0_g1_i1	1.14752	0.593523	-0.421964	-1.31908
CBV_PAM39268_c0_g1_i1	1.15389	0.689064	-0.764718	-1.07824
CBV_PAM972_c0_g4_i1	0.648364	1.17661	-0.764279	-1.0607
CBV_PAM64810_c0_g3_i1	1.16259	0.676509	-0.859758	-0.979342
CBV_PAM38876_c0_g1_i1	1.1238	0.697203	-0.739837	-1.08117
CBV_PAM11724_c1_g1_i1	1.53309	-0.137127	-0.919766	-0.476199
CBV_PAM26901_c0_g1_i1	1.51893	-0.0276704	-0.714599	-0.776657
CBV_PAM3518_c0_g1_i1	1.32828	0.386184	-0.993653	-0.72081
CBV_PAM27309_c0_g1_i1	1.55327	-0.184584	-0.560586	-0.808098
CBV_PAM29865_c0_g1_i1	0.999424	0.836675	-0.975428	-0.860671
CBV_PAM66258_c0_g1_i1	0.959598	0.795227	-0.515498	-1.23933
CBV_PAM64809_c1_g1_i1	1.29333	0.29499	-1.19882	-0.389508
CBV_PAM75038_c0_g1_i1	0.874622	0.950315	-0.839452	-0.985485
CBV_PAM26110_c2_g1_i1	1.49836	-0.0165348	-0.740914	-0.740914
CBV_PAM12537_c0_g1_i1	1.10122	0.702694	-0.938167	-0.865742
CBV_PAM36440_c0_g1_i1	1.32081	0.373785	-0.777286	-0.917312
CBV_PAM14458_c0_g1_i1	0.803754	0.994693	-0.989329	-0.809118
CBV_PAM52896_c1_g1_i1	1.2435	0.472201	-0.941555	-0.774144
CBV_PAM3732_c1_g1_i1	1.03879	0.60336	-1.28048	-0.361672
CBV_PAM31673_c0_g2_i1	1.55094	-0.516981	-0.516981	-0.516981
CBV_PAM38432_c0_g1_i1	1.38218	0.193312	-0.724123	-0.851365
CBV_PAM45540_c0_g1_i1	1.4513	0.0202826	-0.735793	-0.735793
CBV_PAM71903_c1_g1_i1	1.31135	0.276896	-1.04778	-0.540471
CBV_PAM64247_c0_g1_i1	1.36944	0.214021	-0.787009	-0.796453
CBV_PAM69051_c0_g1_i1	1.30408	0.336625	-0.832443	-0.808265
CBV_PAM59140_c0_g1_i1	1.05831	0.674701	-1.00797	-0.725035
CBV_PAM64134_c0_g3_i1	1.16077	0.409855	-1.21234	-0.358281
CBV_PAM50686_c0_g1_i1	1.2797	0.333972	-0.960274	-0.653399
CBV_PAM11002_c1_g1_i1	1.11695	0.584177	-0.674959	-1.02616
CBV_PAM65774_c0_g1_i1	1.01715	0.635647	-1.20658	-0.446217
CBV_PAM66755_c0_g1_i1	1.17075	0.502322	-0.655734	-1.01734
CBV_PAM46015_c0_g1_i1	1.42532	0.0162062	-0.720763	-0.720763
CBV_PAM69952_c0_g1_i1	1.03389	0.693009	-0.843828	-0.883072
CBV_PAM6544_c0_g1_i1	1.33566	0.0401219	-1.07802	-0.29776
CBV_PAM38290_c1_g1_i1	1.44344	-0.151468	-0.455579	-0.836388
CBV_PAM41373_c0_g1_i1	1.03883	0.669277	-0.859288	-0.848821
CBV_PAM13915_c1_g1_i1	1.30048	0.261759	-0.812626	-0.749615
CBV_PAM25552_c1_g1_i1	0.919644	0.772779	-1.00737	-0.685052
CBV_PAM51020_c1_g1_i1	1.29952	0.202652	-0.583427	-0.918746
CBV_PAM44506_c0_g1_i1	1.07866	0.56158	-0.975955	-0.664284
CBV_PAM11246_c0_g2_i1	0.626996	1.03625	-0.797335	-0.865913
CBV_PAM10185_c0_g1_i1	1.42443	-0.225853	-0.732037	-0.466543
CBV_PAM51904_c0_g1_i1	1.10179	0.49809	-0.591943	-1.00794
CBV_PAM25030_c0_g1_i1	0.757825	0.869896	-0.615927	-1.01179
CBV_PAM57349_c0_g1_i1	1.06477	0.540457	-0.707439	-0.897791
CBV_PAM65647_c0_g1_i1	1.2374	0.259233	-0.787571	-0.709062
CBV_PAM2316_c0_g1_i1	1.28546	0.15202	-0.669298	-0.768178
CBV_PAM51286_c0_g1_i1	1.31721	0.0438858	-0.766738	-0.594356
CBV_PAM24348_c0_g1_i1	1.15076	0.35084	-0.972448	-0.529156
CBV_PAM49590_c0_g1_i1	1.30447	0.0680214	-0.575691	-0.7968
CBV_PAM39067_c0_g1_i1	1.25164	0.181184	-0.820106	-0.612717
CBV_PAM39190_c0_g1_i1	1.16997	0.345325	-0.711684	-0.803611
CBV_PAM25090_c2_g1_i1	1.12201	0.421109	-0.766492	-0.776632
CBV_PAM7519_c0_g2_i1	0.580593	0.823333	-0.145155	-1.25877
CBV_PAM70405_c0_g1_i1	1.18181	0.0886475	-1.04677	-0.22369
CBV_PAM50972_c1_g14_i1	0.24992	1.19888	-0.7244	-0.7244
CBV_PAM39223_c0_g1_i1	1.22743	0.168863	-0.828868	-0.567422
CBV_PAM39204_c1_g1_i1	1.02241	0.306154	-1.16814	-0.160421
CBV_PAM3916_c0_g1_i1	1.12621	0.333949	-0.648729	-0.81143
CBV_PAM50807_c0_g9_i1	1.19907	0.19727	-0.698172	-0.698172
CBV_PAM64386_c0_g1_i1	1.1839	0.113759	-0.942333	-0.355327
CBV_PAM51189_c0_g1_i1	0.569669	0.949496	-0.895866	-0.623298
CBV_PAM12325_c1_g1_i1	0.829256	0.717342	-0.769309	-0.777289
CBV_PAM65041_c1_g1_i1	0.808305	0.733825	-0.751709	-0.790422
CBV_PAM48732_c0_g1_i1	0.947558	0.541423	-0.698436	-0.790545
CBV_PAM51405_c0_g1_i1	1.24832	-0.144298	-0.772445	-0.331579
CBV_PAM15708_c0_g1_i1	1.1804	0.129881	-0.655143	-0.655143
CBV_PAM37702_c0_g1_i1	0.544909	0.660939	-1.23593	0.0300806
CBV_PAM6527_c0_g1_i1	1.08005	0.317954	-0.641889	-0.756111
CBV_PAM16088_c0_g1_i1	0.762654	0.732806	-0.682273	-0.813187
CBV_PAM51037_c0_g1_i1	1.00388	0.422571	-0.599458	-0.826994
CBV_PAM39758_c0_g1_i1	1.24682	-0.123375	-0.485899	-0.637542
CBV_PAM10548_c3_g1_i1	0.638911	0.588362	-1.20562	-0.0216579
CBV_PAM53798_c0_g1_i1	1.02564	0.389692	-0.715922	-0.699412
CBV_PAM27393_c0_g1_i1	1.09031	0.274665	-0.749115	-0.615865
CBV_PAM54432_c0_g1_i1	0.730076	0.749733	-0.707555	-0.772255
CBV_PAM1313_c0_g1_i1	0.882323	0.522556	-0.905144	-0.499734
CBV_PAM12062_c0_g1_i1	0.801513	0.422678	-1.08142	-0.142775
CBV_PAM1118_c1_g1_i1	0.799568	0.488285	-0.997173	-0.29068
CBV_PAM3292_c0_g1_i1	0.633926	0.69071	-0.8995	-0.425135
CBV_PAM50818_c0_g1_i1	0.713638	0.59543	-0.915082	-0.393985
CBV_PAM37250_c2_g1_i1	1.06346	0.11005	-0.584816	-0.588695
CBV_PAM2015_c0_g1_i1	0.770869	0.5569	-0.789642	-0.538127
CBV_PAM15646_c0_g1_i1	0.841465	0.439957	-0.638592	-0.642829
CBV_PAM39269_c0_g1_i1	0.797672	0.436156	-0.503172	-0.730656
CBV_PAM66539_c1_g3_i1	0.980093	-0.166825	-0.0283125	-0.784956
CBV_PAM65127_c0_g1_i1	0.718194	0.442763	-0.338291	-0.822666
CBV_PAM48937_c0_g1_i1	0.899424	0.169918	-0.534671	-0.534671
CBV_PAM38203_c0_g1_i1	0.677938	0.464379	-0.597031	-0.545286
CBV_PAM17954_c0_g1_i1	0.819081	0.243161	-0.531121	-0.531121
CBV_PAM972_c0_g11_i1	0.733152	0.0914893	-0.756755	-0.0678863

## Sheet: Subcluster3
Additional file 6. Expression subcluster matrix. Values of Trinity gene expression (TPM-TMM) for 15 subclusters identified by gene expression cluster analysis during fruit developmental stages (150, 240, 300 and 390 days after fruit set; DAFS) in Persea americana cv. Hass.
Trinity genes	150-DAFS	240-DAFS	300-DAFS	390-DAFS
CBV_PAM3686_c0_g1_i1	3.33416	-1.81121	-2.16281	0.639867
CBV_PAM28929_c0_g2_i1	2.04083	-2.1474	-2.1474	2.25397
CBV_PAM29599_c0_g1_i1	3.08386	-2.21311	-1.72435	0.853592
CBV_PAM41712_c0_g1_i1	2.85471	-2.13678	-1.72979	1.01186
CBV_PAM26039_c0_g2_i1	1.18926	-3.4083	0.684818	1.53423
CBV_PAM54493_c0_g1_i1	2.3199	-2.25706	-1.35947	1.29663
CBV_PAM67738_c0_g1_i1	2.34497	-2.02807	-1.62729	1.31039
CBV_PAM2542_c0_g1_i1	2.77392	-1.96582	-1.19346	0.385363
CBV_PAM978_c1_g1_i1	2.24012	-1.97086	-1.28992	1.02066
CBV_PAM64359_c1_g1_i1	2.42036	-1.63569	-1.56318	0.77851
CBV_PAM51781_c2_g1_i1	2.41274	-1.87669	-1.21628	0.680236
CBV_PAM73192_c0_g1_i1	1.78346	-1.72202	-1.53859	1.47715
CBV_PAM15331_c0_g1_i1	2.09952	-1.98415	-1.01999	0.90462
CBV_PAM13487_c0_g1_i1	2.57216	-1.41522	-1.14991	-0.00702985
CBV_PAM37504_c0_g7_i1	2.25116	-0.695215	-2.02538	0.469438
CBV_PAM61454_c0_g1_i1	2.45498	-1.46079	-1.18854	0.194345
CBV_PAM37801_c0_g1_i1	2.05313	-1.96782	-0.871216	0.785905
CBV_PAM71536_c0_g1_i1	2.08898	-1.85123	-0.960744	0.722989
CBV_PAM38190_c0_g1_i1	1.78857	-1.90635	-1.02744	1.14522
CBV_PAM38066_c0_g1_i1	2.25329	-1.48534	-1.27272	0.50478
CBV_PAM1851_c1_g1_i1	1.99548	-1.5822	-1.33658	0.923297
CBV_PAM31604_c0_g1_i1	2.00586	-1.67354	-1.12088	0.788559
CBV_PAM14523_c0_g1_i1	1.99219	-1.5099	-1.28649	0.804196
CBV_PAM24147_c0_g1_i1	2.32873	-0.807814	-1.5353	0.0143756
CBV_PAM1383_c0_g1_i1	1.81271	-1.68217	-1.10446	0.973918
CBV_PAM14061_c0_g1_i1	1.3743	-1.41158	-1.41607	1.45336
CBV_PAM54116_c0_g1_i1	2.23641	-0.798486	-1.47902	0.0410972
CBV_PAM38191_c0_g1_i1	2.00522	-1.42278	-1.12951	0.547062
CBV_PAM55598_c0_g1_i1	1.68463	-1.50824	-1.17859	1.0022
CBV_PAM2923_c2_g1_i1	1.96675	-1.26107	-1.28681	0.581134
CBV_PAM50894_c1_g1_i1	1.17455	-1.97029	-0.481368	1.27711
CBV_PAM41061_c0_g1_i1	1.66391	-0.95516	-1.61235	0.9036
CBV_PAM66301_c0_g1_i1	1.87836	-1.28408	-1.22584	0.631553
CBV_PAM68578_c0_g1_i1	1.92526	-1.32264	-1.14398	0.541365
CBV_PAM1184_c0_g1_i1	2.2449	-1.051	-0.887272	-0.306631
CBV_PAM74498_c0_g1_i1	1.95861	-1.30367	-1.12522	0.470283
CBV_PAM70137_c0_g1_i1	1.74912	-1.49373	-1.04532	0.78993
CBV_PAM41558_c0_g1_i1	1.92874	-1.44997	-0.969711	0.490937
CBV_PAM75899_c0_g1_i1	1.8433	-1.11324	-1.3834	0.653337
CBV_PAM15799_c0_g1_i1	2.19643	-1.29071	-0.537666	-0.368055
CBV_PAM28393_c0_g1_i1	2.05427	-1.49471	-0.585168	0.0256094
CBV_PAM4185_c0_g1_i1	1.81439	-1.63973	0.527044	-0.701702
CBV_PAM38771_c0_g1_i1	1.47658	-1.49776	-1.06027	1.08145
CBV_PAM33970_c0_g1_i1	1.90311	-1.45438	-0.885721	0.436994
CBV_PAM67903_c0_g1_i1	1.93047	-0.402981	-1.66792	0.140427
CBV_PAM33235_c0_g1_i1	1.80737	-1.29454	-1.15525	0.642421
CBV_PAM12281_c1_g1_i1	1.7775	-1.4294	-1.0133	0.665211
CBV_PAM14502_c0_g1_i1	1.73198	-1.78374	0.512665	-0.460911
CBV_PAM55378_c0_g1_i1	1.95037	-1.30875	-0.987674	0.346044
CBV_PAM59980_c0_g1_i1	1.93124	-1.47749	-0.768834	0.315089
CBV_PAM12874_c0_g1_i1	1.7642	-1.24765	-1.20416	0.687607
CBV_PAM64704_c1_g1_i1	1.7056	-1.61848	-0.757078	0.669964
CBV_PAM23903_c0_g1_i1	2.14295	-0.780797	-1.09848	-0.263678
CBV_PAM53725_c0_g1_i1	2.05879	-1.14499	-0.960834	0.0470334
CBV_PAM51221_c0_g1_i1	1.98414	-1.42698	-0.683167	0.126011
CBV_PAM70454_c0_g1_i1	1.63814	-1.44402	-1.00616	0.812038
CBV_PAM26175_c1_g1_i1	1.80204	-1.38405	-0.970231	0.552241
CBV_PAM645_c2_g1_i1	1.90007	-1.08965	-1.19989	0.38947
CBV_PAM41011_c0_g1_i1	2.10917	-0.934636	-0.972146	-0.202389
CBV_PAM56774_c0_g1_i1	1.64615	-1.11004	-1.30687	0.770749
CBV_PAM24971_c1_g1_i1	1.96794	-1.3067	-0.794875	0.13363
CBV_PAM67295_c0_g1_i1	1.50627	-0.949504	-1.4673	0.910534
CBV_PAM56382_c0_g1_i1	1.87622	-1.37999	-0.786904	0.290673
CBV_PAM15492_c0_g1_i1	1.9753	-1.42363	-0.232032	-0.319634
CBV_PAM4163_c0_g1_i1	2.03812	-0.596598	-1.23704	-0.20448
CBV_PAM27959_c0_g1_i1	2.0225	-1.05168	-0.922837	-0.0479918
CBV_PAM2066_c0_g1_i1	1.97211	-0.796347	-1.21755	0.0417795
CBV_PAM60245_c0_g1_i1	1.98737	-0.952259	-1.05388	0.0187606
CBV_PAM10822_c0_g1_i1	1.90016	-1.44362	-0.516312	0.0597729
CBV_PAM23907_c1_g1_i1	1.9391	-1.35515	-0.597302	0.013348
CBV_PAM26150_c0_g1_i1	1.35372	-1.43443	-0.959299	1.04001
CBV_PAM17031_c0_g1_i1	1.85359	-0.336639	-1.51199	-0.00496666
CBV_PAM66452_c0_g1_i1	1.78562	-1.16023	-1.0475	0.42211
CBV_PAM47672_c0_g1_i1	1.64907	-1.34419	-0.937395	0.632517
CBV_PAM17938_c0_g1_i1	1.53857	-0.777095	-1.50422	0.742744
CBV_PAM12007_c1_g1_i1	1.6293	-1.13113	-1.17408	0.675911
CBV_PAM46554_c0_g1_i1	1.63992	-1.27508	-1.01482	0.649981
CBV_PAM1833_c1_g1_i1	1.31929	-1.55318	-0.773109	1.00699
CBV_PAM39360_c0_g1_i1	1.7135	-1.1238	-1.11936	0.529663
CBV_PAM25518_c0_g1_i1	1.95704	-1.26873	-0.4927	-0.195617
CBV_PAM66717_c0_g1_i1	1.45299	-1.03197	-1.29978	0.878765
CBV_PAM45302_c0_g1_i1	1.91241	-1.28526	-0.56981	-0.0573427
CBV_PAM3082_c0_g1_i1	1.55524	-1.08762	-1.21272	0.745103
CBV_PAM55117_c1_g1_i1	1.7111	-0.484694	-1.52282	0.296418
CBV_PAM66373_c0_g1_i1	1.83183	-0.437823	-1.41732	0.0233069
CBV_PAM16346_c0_g1_i1	1.58182	-1.22302	-1.04351	0.6847
CBV_PAM40489_c0_g1_i1	1.35803	-1.32136	-1.00746	0.970786
CBV_PAM1436_c0_g1_i1	1.95418	-0.960579	-0.868115	-0.125484
CBV_PAM54731_c0_g1_i1	1.75622	-0.957062	-1.16929	0.370136
CBV_PAM67868_c1_g1_i1	1.57998	-0.888725	-1.33073	0.639472
CBV_PAM28135_c0_g1_i1	1.68232	-1.05391	-1.12883	0.500419
CBV_PAM1359_c1_g1_i1	1.27765	-1.14466	-1.17044	1.03745
CBV_PAM68619_c0_g1_i1	1.70812	-1.39742	-0.618613	0.307911
CBV_PAM12125_c0_g1_i1	1.81492	-0.766686	-1.19375	0.145517
CBV_PAM50814_c0_g2_i1	1.77208	-0.402224	-1.40855	0.0387029
CBV_PAM37504_c0_g6_i1	1.62793	-0.974419	-1.18226	0.528748
CBV_PAM68965_c0_g1_i1	1.88139	-1.01272	-0.797529	-0.0711441
CBV_PAM60218_c0_g1_i1	1.73162	-0.293254	-1.45609	0.0177184
CBV_PAM10687_c2_g2_i1	1.79897	-0.977069	-0.977069	0.155167
CBV_PAM45537_c0_g1_i1	1.85467	-1.23542	-0.274085	-0.345167
CBV_PAM43685_c0_g1_i1	1.6717	-1.05075	-1.02744	0.40649
CBV_PAM69378_c1_g1_i1	1.76177	-1.13183	-0.827742	0.197806
CBV_PAM70732_c0_g1_i1	1.78043	-1.14509	-0.762696	0.127349
CBV_PAM60744_c0_g1_i1	1.73614	-1.12382	-0.846846	0.234526
CBV_PAM20255_c0_g1_i1	1.11956	-1.11797	-1.12627	1.12469
CBV_PAM67246_c0_g1_i1	1.77291	-0.813092	-1.0958	0.135984
CBV_PAM51885_c0_g1_i1	1.43893	-1.06023	-1.11372	0.735025
CBV_PAM68279_c0_g1_i1	1.6699	-0.988586	-1.02162	0.340305
CBV_PAM14687_c0_g1_i1	1.60413	-1.01636	-1.04818	0.460407
CBV_PAM54776_c0_g1_i1	1.48151	-1.14662	-0.977311	0.642425
CBV_PAM51336_c0_g1_i1	1.30648	-1.17613	-1.00556	0.875205
CBV_PAM29260_c1_g1_i1	1.87255	-0.781303	-0.773767	-0.317482
CBV_PAM65509_c0_g1_i1	1.49575	-1.06678	-1.03381	0.604836
CBV_PAM1498_c0_g1_i1	1.65974	-1.10618	-0.847522	0.293968
CBV_PAM27551_c0_g1_i1	1.74859	-0.653774	-1.11816	0.023345
CBV_PAM54242_c0_g1_i1	1.34212	-1.14852	-0.978785	0.785181
CBV_PAM45951_c0_g1_i1	1.61209	-0.450178	-1.35737	0.195462
CBV_PAM64239_c1_g1_i1	1.81028	-0.785705	-0.863125	-0.161446
CBV_PAM42335_c0_g1_i1	1.80505	-0.981292	-0.577412	-0.246351
CBV_PAM60920_c0_g1_i1	1.40898	-1.10285	-0.953064	0.646932
CBV_PAM54721_c0_g1_i1	1.74255	-1.11636	-0.433275	-0.192913
CBV_PAM71873_c0_g1_i1	1.73765	-0.878925	-0.820541	-0.0381892
CBV_PAM2752_c0_g1_i1	1.48886	-1.07835	-0.894555	0.484039
CBV_PAM31675_c0_g1_i1	1.61909	-1.03141	-0.801087	0.21341
CBV_PAM2637_c0_g1_i1	1.77146	-0.573322	-0.893961	-0.304175
CBV_PAM50972_c1_g4_i1	0.836221	-1.03319	-1.03319	1.23015
CBV_PAM52448_c0_g1_i1	1.46403	-1.07567	-0.89107	0.502708
CBV_PAM15018_c0_g1_i1	1.66037	-1.02027	-0.714389	0.074293
CBV_PAM43545_c0_g1_i1	1.6975	-1.0212	-0.614012	-0.062291
CBV_PAM34350_c0_g1_i1	1.55949	-0.934565	-0.927369	0.302443
CBV_PAM68361_c0_g1_i1	1.61859	-0.887091	-0.901824	0.170326
CBV_PAM40291_c0_g1_i1	1.67747	-0.840788	-0.841425	0.00474255
CBV_PAM34137_c0_g1_i1	0.971818	-1.35639	-0.626592	1.01117
CBV_PAM40592_c0_g1_i1	1.26716	-1.09693	-0.912612	0.742388
CBV_PAM64204_c0_g1_i1	1.08521	-1.23758	-0.779619	0.931986
CBV_PAM64239_c0_g1_i1	1.70617	-0.858181	-0.712198	-0.13579
CBV_PAM21408_c0_g1_i1	1.29128	-1.14362	-0.830408	0.682754
CBV_PAM54035_c0_g1_i1	1.42197	-0.847291	-1.07003	0.495346
CBV_PAM40733_c0_g1_i1	1.65641	-0.732105	-0.917131	-0.00717754
CBV_PAM11390_c0_g1_i1	1.3591	-1.37019	-0.433757	0.44485
CBV_PAM28284_c0_g4_i1	1.63012	-1.12854	-0.385854	-0.115725
CBV_PAM1871_c0_g1_i1	1.51957	-0.77989	-1.03857	0.298894
CBV_PAM1672_c0_g1_i1	1.46018	-0.690778	-1.15223	0.38283
CBV_PAM51785_c1_g1_i1	1.49964	-1.17416	-0.593263	0.267777
CBV_PAM9125_c0_g1_i1	1.20193	-1.31809	-0.597131	0.713296
CBV_PAM43008_c0_g1_i1	1.70396	-0.749683	-0.700001	-0.254271
CBV_PAM23851_c3_g1_i1	1.2418	-0.898494	-1.0651	0.721788
CBV_PAM10340_c0_g1_i1	1.61528	-0.95167	-0.698451	0.0348393
CBV_PAM25140_c1_g1_i1	1.34034	-0.963824	-0.939657	0.563142
CBV_PAM5428_c0_g1_i1	1.50593	-1.26485	-0.0435882	-0.197495
CBV_PAM60565_c0_g1_i1	1.38407	-0.939657	-0.932183	0.487771
CBV_PAM40066_c0_g1_i1	1.4349	-0.761609	-1.03534	0.36205
CBV_PAM29127_c0_g1_i1	1.45237	-1.04105	-0.734027	0.322708
CBV_PAM19999_c0_g1_i1	1.63748	-0.731339	-0.718687	-0.18745
CBV_PAM46587_c1_g1_i1	1.19769	-1.0203	-0.887331	0.70994
CBV_PAM39848_c2_g1_i1	1.20722	-1.03655	-0.866508	0.695839
CBV_PAM32418_c0_g1_i1	1.28639	-0.906737	-0.964431	0.584774
CBV_PAM20485_c0_g1_i1	1.4844	-1.04639	-0.620272	0.182265
CBV_PAM74927_c0_g1_i1	1.18694	-0.994236	-0.897822	0.705117
CBV_PAM28923_c0_g1_i1	1.41464	-1.03046	-0.718506	0.334328
CBV_PAM2647_c0_g1_i1	1.28841	-0.970286	-0.879339	0.561214
CBV_PAM26376_c0_g1_i1	1.61748	-0.76456	-0.612228	-0.24069
CBV_PAM66062_c0_g1_i1	1.3784	-1.2162	-0.421943	0.259739
CBV_PAM3539_c0_g1_i1	1.31704	-0.993179	-0.803643	0.479781
CBV_PAM31439_c0_g1_i1	1.43869	-0.94677	-0.747951	0.256027
CBV_PAM75196_c0_g1_i1	1.40768	-0.86457	-0.865686	0.322573
CBV_PAM17250_c1_g1_i1	1.55488	-0.760908	-0.755979	-0.0379884
CBV_PAM55495_c0_g1_i1	1.41329	-0.916982	-0.79404	0.297736
CBV_PAM5476_c0_g1_i1	1.39452	-0.986873	-0.726974	0.319324
CBV_PAM32423_c0_g1_i1	1.48128	-0.751283	-0.873771	0.143771
CBV_PAM69673_c0_g1_i1	1.40003	-0.932486	-0.778263	0.310723
CBV_PAM21352_c0_g1_i1	1.44498	-1.13774	0.0705962	-0.377835
CBV_PAM44642_c0_g1_i1	1.43065	-1.08666	-0.494842	0.150847
CBV_PAM20403_c0_g1_i1	1.48297	-1.07598	-0.353996	-0.0529971
CBV_PAM16711_c0_g1_i1	1.40417	-1.13538	-0.43448	0.165691
CBV_PAM40022_c0_g1_i1	1.52094	-0.720241	-0.787367	-0.0133323
CBV_PAM69100_c0_g1_i1	1.37497	-0.258156	-1.21621	0.0993956
CBV_PAM54271_c0_g1_i1	1.21342	-1.08509	-0.681653	0.553324
CBV_PAM11440_c2_g1_i1	1.51587	-0.987867	-0.247816	-0.280189
CBV_PAM28837_c1_g1_i1	1.41126	-0.986924	0.201862	-0.626196
CBV_PAM43578_c0_g1_i1	1.13851	-0.661113	-1.11389	0.636495
CBV_PAM61805_c0_g1_i1	1.14135	-1.12852	-0.630967	0.618141
CBV_PAM64381_c0_g1_i1	1.45447	-0.616331	-0.920118	0.081975
CBV_PAM66663_c0_g1_i1	1.40637	-0.782064	-0.828723	0.204415
CBV_PAM28121_c0_g1_i1	1.32845	-0.543326	-1.07743	0.292311
CBV_PAM9204_c0_g1_i1	1.46634	-0.634128	-0.843548	0.011338
CBV_PAM66851_c1_g1_i1	1.3711	-0.721064	-0.890805	0.240773
CBV_PAM38324_c1_g1_i1	1.17526	-1.00849	-0.729431	0.562658
CBV_PAM3566_c0_g1_i1	1.42373	-0.841535	-0.695422	0.113227
CBV_PAM10693_c1_g1_i1	1.32481	-0.823734	-0.828292	0.32722
CBV_PAM67468_c0_g1_i1	1.27584	-1.2132	-0.261909	0.199266
CBV_PAM67380_c1_g1_i1	1.12738	-1.02001	-0.720084	0.612712
CBV_PAM74991_c0_g1_i1	1.48131	-0.850012	-0.45509	-0.17621
CBV_PAM35419_c0_g1_i1	1.37469	-0.878653	-0.674769	0.178733
CBV_PAM2728_c0_g1_i1	1.33294	-0.835187	-0.772457	0.274701
CBV_PAM44878_c0_g1_i1	1.46823	-0.865087	-0.436145	-0.166997
CBV_PAM7841_c0_g1_i1	0.560376	-0.938009	-0.774401	1.15203
CBV_PAM53669_c1_g1_i1	1.42584	-0.720922	-0.751113	0.046197
CBV_PAM44943_c0_g1_i1	1.12735	-0.863356	-0.861327	0.597328
CBV_PAM51529_c0_g1_i1	1.46794	-0.865543	-0.204125	-0.398275
CBV_PAM53536_c0_g1_i1	1.48855	-0.806591	-0.356992	-0.324965
CBV_PAM44848_c0_g1_i1	1.24719	-0.978428	-0.632982	0.364216
CBV_PAM13894_c0_g1_i1	1.32521	-0.788127	-0.763587	0.226508
CBV_PAM71658_c0_g1_i1	1.30754	-0.85758	-0.702229	0.252271
CBV_PAM12009_c0_g3_i1	1.43715	-0.48525	-0.823526	-0.128369
CBV_PAM5570_c0_g1_i1	1.35129	-1.05023	-0.225071	-0.075987
CBV_PAM15544_c0_g1_i1	1.31958	-0.845372	-0.676393	0.202183
CBV_PAM30672_c0_g1_i1	1.06383	-0.997281	-0.672674	0.606122
CBV_PAM21188_c0_g1_i1	1.26898	-1.04589	-0.427398	0.204308
CBV_PAM50741_c0_g1_i1	1.25974	-0.652676	-0.893043	0.285977
CBV_PAM38427_c0_g1_i1	1.3265	-0.772564	-0.695321	0.141387
CBV_PAM14464_c0_g1_i1	1.39793	-0.820028	-0.467096	-0.110811
CBV_PAM65049_c0_g1_i1	1.08162	-0.984342	-0.629927	0.532648
CBV_PAM27647_c0_g1_i1	1.25986	-0.485809	-0.975973	0.201923
CBV_PAM26976_c0_g1_i1	1.23781	-0.855156	-0.680373	0.297719
CBV_PAM40886_c0_g1_i1	1.26546	-1.06115	-0.273063	0.0687525
CBV_PAM57828_c1_g1_i1	1.32159	-0.935174	-0.419867	0.0334495
CBV_PAM28100_c1_g1_i1	1.27996	-1.04835	-0.220278	-0.011327
CBV_PAM51921_c0_g1_i1	1.12141	-0.87469	-0.72146	0.474739
CBV_PAM305_c0_g1_i1	1.32462	-0.807414	-0.575252	0.0580486
CBV_PAM37_c0_g1_i1	1.3868	-0.675824	-0.580699	-0.130281
CBV_PAM43732_c0_g1_i1	1.18379	-1.13504	-0.0097672	-0.0389788
CBV_PAM54113_c0_g1_i1	1.19157	-0.941723	-0.539895	0.290052
CBV_PAM40042_c0_g1_i1	1.30927	-0.938205	-0.221819	-0.149243
CBV_PAM11272_c0_g2_i1	1.10526	-1.17495	-0.13071	0.2004
CBV_PAM11432_c0_g1_i1	0.80488	-1.05362	-0.53279	0.781531
CBV_PAM38307_c1_g1_i1	1.2844	-0.856484	-0.506485	0.0785693
CBV_PAM15608_c0_g1_i1	1.23586	-0.817537	-0.632357	0.214038
CBV_PAM3602_c0_g1_i1	1.16766	-0.908953	-0.581726	0.323015
CBV_PAM16324_c0_g1_i1	1.29643	-0.91912	-0.298312	-0.0789973
CBV_PAM44693_c0_g1_i1	1.09458	-0.719591	-0.831358	0.456372
CBV_PAM43407_c0_g1_i1	1.03494	-0.715996	-0.858503	0.539562
CBV_PAM8041_c0_g1_i1	1.12041	-0.644442	-0.869838	0.393868
CBV_PAM26508_c1_g1_i1	1.30278	-0.772691	-0.533473	0.00338705
CBV_PAM26416_c3_g1_i1	1.23947	-0.662661	-0.740798	0.163988
CBV_PAM26788_c0_g1_i1	1.07075	-0.686973	-0.84659	0.46281
CBV_PAM69868_c0_g1_i1	1.21668	-0.887621	-0.491891	0.162836
CBV_PAM68472_c0_g1_i1	1.30548	-0.735781	-0.491997	-0.077699
CBV_PAM394_c1_g1_i1	1.24437	-0.693218	-0.66684	0.115688
CBV_PAM42746_c0_g1_i1	0.984927	-0.747018	-0.797638	0.559729
CBV_PAM39336_c0_g1_i1	0.862375	-1.23196	0.446376	-0.0767861
CBV_PAM58200_c0_g1_i1	1.13939	-0.975111	-0.399729	0.235447
CBV_PAM25888_c1_g1_i1	1.25196	-0.522756	-0.770204	0.0410031
CBV_PAM29466_c0_g1_i1	1.16266	-0.600211	-0.803428	0.240982
CBV_PAM71647_c0_g1_i1	1.16685	-0.71753	-0.663864	0.214539
CBV_PAM67551_c0_g1_i1	1.07811	-0.896301	-0.519585	0.337779
CBV_PAM59829_c0_g1_i1	0.863754	-0.797383	-0.724353	0.657982
CBV_PAM44794_c0_g1_i1	0.983536	-0.979259	-0.447991	0.443715
CBV_PAM64438_c1_g1_i1	0.990739	-0.990361	-0.418047	0.417669
CBV_PAM37598_c0_g1_i1	1.11412	-0.818703	-0.567859	0.272445
CBV_PAM52860_c0_g1_i1	1.11662	-0.698582	-0.698582	0.280544
CBV_PAM5015_c1_g1_i1	1.13376	-0.956043	-0.257248	0.0795344
CBV_PAM70787_c0_g1_i1	1.03336	-0.922827	-0.465592	0.355055
CBV_PAM58392_c0_g1_i1	1.11355	-0.773592	-0.596706	0.25675
CBV_PAM543_c5_g1_i1	1.11254	-0.859145	-0.45971	0.206312
CBV_PAM42898_c0_g1_i1	1.17659	-0.83	-0.367903	0.0213106
CBV_PAM11249_c1_g1_i1	1.13275	-0.718301	-0.602246	0.187799
CBV_PAM27877_c0_g1_i1	1.09022	-0.941252	-0.304826	0.155853
CBV_PAM17187_c0_g1_i1	1.02675	-0.803126	-0.585281	0.361658
CBV_PAM58183_c0_g1_i1	1.03774	-0.76641	-0.580506	0.309177
CBV_PAM42965_c0_g1_i1	0.772506	-0.686311	-0.755609	0.669415
CBV_PAM24281_c0_g1_i1	1.16829	-0.633739	-0.522639	-0.0119076
CBV_PAM17387_c0_g1_i1	1.10278	-0.600323	-0.651872	0.149411
CBV_PAM30199_c0_g1_i1	1.03243	-0.764318	-0.521548	0.253438
CBV_PAM26058_c1_g1_i1	0.87671	-1.06706	-0.0463642	0.236715
CBV_PAM37504_c0_g10_i1	1.04189	-0.6407	-0.6407	0.239507
CBV_PAM40364_c0_g1_i1	1.21041	-0.427093	-0.44327	-0.340045
CBV_PAM55364_c0_g1_i1	0.978982	-0.710804	-0.613278	0.345099
CBV_PAM68027_c0_g1_i1	0.735672	-1.15099	0.25875	0.156569
CBV_PAM45806_c0_g1_i1	1.11914	-0.601916	-0.572345	0.0551171
CBV_PAM11549_c0_g1_i1	1.06187	-0.726719	-0.462208	0.127061
CBV_PAM18544_c0_g1_i1	0.843057	-0.982547	-0.245164	0.384654
CBV_PAM31779_c0_g1_i1	0.783254	-0.694203	-0.670089	0.581038
CBV_PAM56186_c0_g1_i1	1.04592	-0.494203	-0.682549	0.130836
CBV_PAM5150_c0_g1_i1	0.945483	-0.94498	-0.126832	0.126329
CBV_PAM13445_c0_g1_i1	1.01086	-0.562174	-0.642894	0.194208
CBV_PAM69829_c0_g1_i1	0.833812	-0.813781	-0.472959	0.452929
CBV_PAM55749_c0_g1_i1	0.795103	-0.763649	-0.549767	0.518313
CBV_PAM68068_c0_g1_i1	1.00108	-0.840477	-0.0815251	-0.079079
CBV_PAM42379_c0_g1_i1	1.07881	-0.459515	-0.574689	-0.0446109
CBV_PAM52588_c0_g1_i1	0.891627	-0.865574	-0.276911	0.250858
CBV_PAM54385_c0_g1_i1	0.822685	-0.724601	-0.519555	0.421471
CBV_PAM47517_c0_g1_i1	0.946	-0.80655	-0.269096	0.129646
CBV_PAM37290_c1_g1_i1	0.999547	-0.716327	-0.292378	0.00915828
CBV_PAM71362_c0_g1_i1	0.790398	-0.745722	-0.467531	0.422855
CBV_PAM4450_c0_g1_i1	0.746162	-0.778589	-0.379148	0.411574
CBV_PAM64204_c0_g2_i1	0.901395	-0.415032	-0.38109	-0.105273
CBV_PAM2515_c0_g5_i1	0.504003	-0.891134	0.24092	0.146211

## Sheet: Subcluster4
Additional file 6. Expression subcluster matrix. Values of Trinity gene expression (TPM-TMM) for 15 subclusters identified by gene expression cluster analysis during fruit developmental stages (150, 240, 300 and 390 days after fruit set; DAFS) in Persea americana cv. Hass.
Trinity genes	150-DAFS	240-DAFS	300-DAFS	390-DAFS
CBV_PAM10189_c0_g1_i1	-5.00895	0.392976	1.68505	2.93093
CBV_PAM50790_c0_g1_i1	-4.76855	0.35548	1.71897	2.6941
CBV_PAM50802_c0_g1_i1	-3.94544	-0.387986	1.72889	2.60454
CBV_PAM37778_c0_g1_i1	-3.36647	-0.247393	0.0684401	3.54542
CBV_PAM51073_c0_g1_i1	-3.38991	-0.210052	0.731835	2.86812
CBV_PAM50768_c0_g1_i1	-3.74215	0.438741	2.09964	1.20376
CBV_PAM23929_c0_g1_i1	-3.69965	0.461511	1.50809	1.73004
CBV_PAM11461_c0_g1_i1	-3.27117	-0.21142	0.878058	2.60453
CBV_PAM24526_c0_g1_i1	-3.15923	-0.299101	0.780417	2.67791
CBV_PAM61696_c0_g1_i1	-1.98095	-1.45668	0.382907	3.05473
CBV_PAM24212_c0_g1_i1	-2.47226	-0.809738	0.615858	2.66614
CBV_PAM38138_c0_g1_i1	-3.17914	1.04215	1.48471	0.652282
CBV_PAM37385_c3_g1_i1	-3.21535	1.07547	1.07239	1.06749
CBV_PAM24977_c0_g1_i1	-2.89974	-0.318183	1.5537	1.66422
CBV_PAM38155_c0_g1_i1	-2.78587	-0.217412	0.888527	2.11476
CBV_PAM767_c0_g1_i1	-2.2509	-0.608979	0.310614	2.54926
CBV_PAM64323_c0_g1_i1	-2.77156	-0.113705	1.72842	1.15685
CBV_PAM16421_c0_g1_i1	-2.54417	-0.335075	0.637012	2.24223
CBV_PAM68532_c0_g1_i1	-2.21109	-1.08748	1.31317	1.9854
CBV_PAM39450_c0_g1_i1	-2.50829	-0.490548	0.920574	2.07826
CBV_PAM10296_c0_g1_i1	-2.4045	-0.607083	0.859556	2.15203
CBV_PAM50996_c0_g2_i1	-2.61123	-0.334403	1.12563	1.82001
CBV_PAM64428_c0_g1_i1	-2.5699	0.0477895	0.349049	2.17306
CBV_PAM11370_c0_g1_i1	-2.65758	-0.086213	0.821717	1.92207
CBV_PAM41239_c0_g1_i1	-2.52398	-0.541852	1.7095	1.35633
CBV_PAM13746_c0_g1_i1	-2.55443	-0.0713397	0.547757	2.07802
CBV_PAM3819_c0_g1_i1	-2.14136	-0.915154	0.854924	2.20159
CBV_PAM54460_c0_g1_i1	-2.38964	-0.259258	0.475741	2.17316
CBV_PAM25588_c0_g1_i1	-2.63638	0.17845	0.631396	1.82654
CBV_PAM10870_c0_g1_i1	-2.43614	-0.381314	0.993323	1.82413
CBV_PAM37945_c0_g1_i1	-2.44315	-0.443342	1.29971	1.58678
CBV_PAM45857_c0_g1_i1	-2.26066	0.0692714	-0.0587875	2.25018
CBV_PAM74617_c0_g1_i1	-2.33107	-0.161669	0.355474	2.13726
CBV_PAM24077_c0_g1_i1	-2.40764	-0.413795	1.71304	1.10839
CBV_PAM69243_c0_g1_i1	-2.61577	0.101682	1.02642	1.48767
CBV_PAM1836_c0_g1_i1	-2.0174	-0.981216	0.978653	2.01996
CBV_PAM12155_c0_g1_i1	-2.10353	-0.762507	0.76799	2.09805
CBV_PAM54337_c0_g1_i1	-2.69298	0.639897	0.714215	1.33887
CBV_PAM65629_c0_g1_i1	-2.52227	-0.030822	0.93122	1.62187
CBV_PAM40275_c0_g1_i1	-2.00512	-0.92989	0.889808	2.0452
CBV_PAM10942_c0_g1_i1	-2.04034	-0.672864	0.539717	2.17349
CBV_PAM53911_c0_g1_i1	-2.23448	-0.21428	0.340055	2.1087
CBV_PAM65972_c0_g1_i1	-2.01952	-0.781949	0.751285	2.05019
CBV_PAM66468_c0_g1_i1	-2.5934	0.31353	1.02516	1.25471
CBV_PAM65391_c0_g1_i1	-2.5722	1.00764	0.240095	1.32446
CBV_PAM11802_c1_g1_i1	-1.95216	-0.953585	0.959458	1.94628
CBV_PAM37286_c0_g1_i1	-1.5816	-1.17525	0.476094	2.28077
CBV_PAM16447_c0_g1_i1	-2.44281	-0.0472175	0.899338	1.59069
CBV_PAM37918_c0_g1_i1	-1.87188	-0.693571	0.276811	2.28864
CBV_PAM51814_c1_g1_i1	-2.52323	0.258467	1.41139	0.853374
CBV_PAM28052_c0_g1_i1	-2.54569	0.555067	0.558962	1.43166
CBV_PAM51715_c0_g1_i1	-2.16695	-0.112648	0.200645	2.07895
CBV_PAM51794_c0_g1_i1	-2.52238	0.274081	0.93699	1.31131
CBV_PAM56703_c0_g1_i1	-2.44885	0.669327	0.233368	1.54616
CBV_PAM23876_c2_g1_i1	-2.05942	-0.718413	1.6728	1.10504
CBV_PAM2746_c0_g1_i1	-1.84694	-1.02584	1.63488	1.23791
CBV_PAM45790_c0_g1_i1	-2.46323	0.686754	0.396314	1.38016
CBV_PAM1955_c1_g2_i1	-1.7499	-0.894739	0.575276	2.06937
CBV_PAM50678_c0_g1_i1	-2.49927	0.792043	1.03818	0.66905
CBV_PAM30336_c0_g1_i1	-2.24842	-0.279635	1.41184	1.11621
CBV_PAM16838_c0_g1_i1	-2.09483	-0.341947	0.560383	1.87639
CBV_PAM27460_c0_g1_i1	-2.36176	0.0550284	0.95904	1.34769
CBV_PAM38899_c0_g1_i1	-2.44488	0.505356	1.26875	0.670774
CBV_PAM52865_c0_g1_i1	-2.33716	0.264554	0.541509	1.5311
CBV_PAM14075_c1_g1_i1	-2.37077	0.133395	1.06668	1.1707
CBV_PAM40641_c0_g1_i1	-2.41148	0.37918	0.955783	1.07651
CBV_PAM1991_c0_g1_i1	-2.45103	0.900332	0.811036	0.73966
CBV_PAM39832_c0_g1_i1	-1.92964	-0.432726	0.371468	1.9909
CBV_PAM38429_c0_g1_i1	-2.11228	-0.193324	0.525266	1.78034
CBV_PAM56901_c0_g1_i1	-2.13749	-0.0516624	0.440985	1.74817
CBV_PAM24848_c0_g1_i1	-2.21673	-0.152121	1.08723	1.28163
CBV_PAM64241_c0_g1_i1	-2.2818	0.0901551	1.34597	0.845675
CBV_PAM59141_c0_g1_i1	-1.94651	-0.585475	0.854037	1.67794
CBV_PAM64350_c0_g1_i1	-2.33789	0.324178	0.842044	1.17167
CBV_PAM11174_c0_g1_i1	-2.38039	0.65188	1.01383	0.714679
CBV_PAM10639_c0_g2_i1	-2.17404	-0.170957	0.938988	1.40601
CBV_PAM11422_c2_g1_i1	-1.98272	-0.195259	0.308059	1.86992
CBV_PAM24246_c0_g1_i1	-2.32747	0.369463	1.05138	0.906636
CBV_PAM66610_c0_g1_i1	-1.88663	-0.643532	1.6082	0.921956
CBV_PAM11481_c0_g1_i1	-1.78324	-0.553499	0.397011	1.93973
CBV_PAM24726_c0_g1_i1	-1.63048	-1.0324	1.20795	1.45493
CBV_PAM17027_c0_g1_i1	-1.48082	-0.984071	0.499756	1.96513
CBV_PAM34010_c0_g1_i1	-2.19915	0.0118933	1.07478	1.11247
CBV_PAM718_c0_g3_i1	-1.7756	-0.66542	0.687074	1.75395
CBV_PAM2409_c0_g1_i1	-2.212	0.366252	1.36775	0.478004
CBV_PAM15674_c0_g1_i1	-1.93079	-0.384962	0.635929	1.67982
CBV_PAM23876_c3_g1_i1	-2.08432	-0.0162444	1.5635	0.537063
CBV_PAM69609_c0_g1_i1	-2.23689	0.256479	0.851042	1.12937
CBV_PAM6558_c0_g1_i1	-1.74832	-0.635081	0.650495	1.7329
CBV_PAM51668_c0_g1_i1	-2.21072	0.27024	0.872369	1.06811
CBV_PAM52720_c0_g2_i1	-1.90102	-0.454529	0.829196	1.52636
CBV_PAM27115_c0_g1_i1	-2.00064	-0.294592	1.02439	1.27085
CBV_PAM73726_c0_g1_i1	-1.99089	-0.0269372	0.401615	1.61621
CBV_PAM64224_c0_g1_i1	-1.57632	-0.732984	0.430739	1.87857
CBV_PAM28021_c0_g1_i1	-1.87047	-0.541802	1.25381	1.15847
CBV_PAM5012_c0_g1_i1	-1.59828	-0.476155	0.0961336	1.97831
CBV_PAM785_c0_g1_i1	-1.75983	-0.210551	0.110761	1.85962
CBV_PAM52741_c0_g1_i1	-1.92932	-0.0950009	1.5934	0.430914
CBV_PAM45841_c0_g1_i1	-1.76289	-0.237582	0.211622	1.78885
CBV_PAM52408_c1_g1_i1	-1.6717	-0.358289	0.171584	1.85841
CBV_PAM52209_c0_g1_i1	-1.41416	-1.09794	1.14944	1.36267
CBV_PAM52865_c0_g3_i1	-2.00952	-0.0990584	1.21997	0.888609
CBV_PAM27860_c0_g1_i1	-1.78851	-0.567129	1.08607	1.26957
CBV_PAM30496_c0_g1_i1	-1.94647	-0.0815417	0.540045	1.48797
CBV_PAM874_c0_g1_i1	-1.96125	-0.178316	1.17922	0.960356
CBV_PAM40345_c1_g1_i1	-1.98191	0.275161	1.44799	0.258759
CBV_PAM24219_c1_g1_i1	-1.97151	-0.0164097	0.611437	1.37649
CBV_PAM65662_c0_g1_i1	-2.11242	0.375183	1.00737	0.729859
CBV_PAM66016_c0_g1_i1	-1.62055	-0.300524	0.0693492	1.85172
CBV_PAM65790_c0_g1_i1	-1.91261	0.432407	-0.0246663	1.50487
CBV_PAM37652_c1_g1_i1	-1.96741	0.0988542	1.42337	0.445186
CBV_PAM64853_c0_g1_i1	-1.99677	0.634219	0.0703964	1.29216
CBV_PAM3315_c0_g1_i1	-1.8734	-0.314772	1.02587	1.16231
CBV_PAM64901_c1_g1_i1	-1.95462	-0.115134	1.04816	1.02159
CBV_PAM1411_c0_g1_i1	-1.88803	0.251785	0.117717	1.51853
CBV_PAM38469_c0_g1_i1	-1.97547	0.0655546	0.785523	1.1244
CBV_PAM39296_c0_g1_i1	-1.85939	0.553882	-0.108496	1.41401
CBV_PAM1113_c0_g1_i1	-1.88939	-0.130855	0.749835	1.27041
CBV_PAM18798_c0_g1_i1	-1.71076	-0.381593	0.550549	1.5418
CBV_PAM29783_c0_g1_i1	-1.60192	-0.534533	0.540823	1.59563
CBV_PAM57064_c1_g1_i1	-1.87556	-0.185324	1.07717	0.98372
CBV_PAM35111_c0_g1_i1	-2.02264	0.419436	0.983074	0.620131
CBV_PAM39057_c0_g1_i1	-1.76574	-0.397683	1.08547	1.07795
CBV_PAM53584_c0_g1_i1	-1.83013	0.351638	0.033433	1.44505
CBV_PAM66036_c3_g1_i1	-1.35419	-0.83433	0.547175	1.64135
CBV_PAM52441_c0_g1_i1	-1.70012	-0.374912	0.634641	1.44039
CBV_PAM31941_c0_g1_i1	-1.68671	-0.155767	0.2384	1.60408
CBV_PAM24314_c1_g1_i1	-1.74353	-0.226619	0.50703	1.46312
CBV_PAM67156_c0_g1_i1	-1.94086	0.149101	0.731851	1.05991
CBV_PAM210_c0_g1_i1	-1.7389	-0.304988	1.36026	0.683627
CBV_PAM23673_c0_g1_i1	-1.80279	-0.200003	0.831387	1.17141
CBV_PAM645_c3_g1_i1	-1.69013	0.0493842	0.0845128	1.55623
CBV_PAM12235_c0_g1_i1	-1.98388	0.61619	0.708289	0.659404
CBV_PAM65749_c0_g1_i1	-1.64262	0.0363357	0.0217619	1.58452
CBV_PAM24009_c1_g1_i1	-1.76068	-0.185032	0.686494	1.25922
CBV_PAM37399_c0_g1_i1	-1.91383	0.728324	0.954155	0.231351
CBV_PAM25090_c1_g1_i1	-1.47179	-0.68546	0.786452	1.37079
CBV_PAM23648_c0_g9_i1	-1.87748	0.141707	0.947401	0.788369
CBV_PAM68781_c0_g1_i1	-1.47913	-0.7012	1.15209	1.02824
CBV_PAM842_c0_g3_i1	-1.7051	-0.233336	1.29969	0.638746
CBV_PAM24065_c1_g1_i1	-1.80039	0.151588	0.363252	1.28555
CBV_PAM27028_c0_g1_i1	-1.33805	-0.851775	0.835916	1.35391
CBV_PAM23610_c0_g1_i1	-1.65566	-0.09634	0.265937	1.48606
CBV_PAM14181_c1_g1_i1	-1.32368	-0.511179	0.1051	1.72976
CBV_PAM41244_c0_g1_i1	-1.53263	-0.522011	0.65621	1.39844
CBV_PAM38978_c0_g1_i1	-1.77233	0.0578779	0.430144	1.28431
CBV_PAM41315_c0_g1_i1	-1.58951	-0.456465	0.85295	1.19302
CBV_PAM23731_c0_g1_i1	-1.86939	0.242525	0.76906	0.85781
CBV_PAM37272_c0_g1_i1	-1.87599	0.451919	0.466312	0.957761
CBV_PAM54156_c0_g1_i1	-1.70267	-0.232514	0.841835	1.09335
CBV_PAM67682_c1_g1_i1	-1.43553	-0.488267	0.376637	1.54716
CBV_PAM52187_c2_g1_i1	-1.64571	0.0414428	0.162185	1.44208
CBV_PAM37814_c0_g1_i1	-1.29975	-0.84903	0.859077	1.2897
CBV_PAM65604_c0_g1_i1	-1.60568	-0.310786	1.33775	0.578719
CBV_PAM64331_c1_g1_i1	-1.71209	-0.0582824	0.502793	1.26758
CBV_PAM13829_c0_g1_i1	-1.69955	-0.168543	1.15504	0.71305
CBV_PAM10641_c1_g1_i1	-1.22973	-0.788248	0.467623	1.55036
CBV_PAM64216_c5_g1_i1	-1.70268	-0.195881	0.866902	1.03166
CBV_PAM24194_c1_g1_i1	-1.07302	-0.912817	0.389019	1.59682
CBV_PAM23648_c0_g3_i1	-1.70393	-0.0897219	0.61729	1.17636
CBV_PAM38107_c0_g1_i1	-1.71352	0.00957172	0.484836	1.21911
CBV_PAM37777_c0_g1_i1	-1.75225	0.280982	0.278904	1.19237
CBV_PAM33581_c0_g1_i1	-1.32362	-0.351659	0.0117478	1.66353
CBV_PAM52601_c0_g1_i1	-1.6897	0.0858941	0.305688	1.29811
CBV_PAM3395_c0_g1_i1	-1.52935	-0.276099	0.367885	1.43757
CBV_PAM43572_c0_g1_i1	-1.55412	-0.436108	1.09086	0.899369
CBV_PAM37293_c0_g1_i1	-1.5051	-0.319672	0.382511	1.44226
CBV_PAM6448_c0_g1_i1	-1.45087	-0.579195	0.821876	1.20819
CBV_PAM2541_c0_g1_i1	-1.56304	0.578678	-0.299114	1.28348
CBV_PAM72345_c0_g11_i1	-1.52993	-0.197032	0.304616	1.42235
CBV_PAM68887_c0_g1_i1	-1.12026	-0.900633	0.581524	1.43937
CBV_PAM37365_c2_g1_i1	-1.70347	-0.00289545	1.06381	0.642556
CBV_PAM51504_c0_g2_i1	-1.77624	0.2801	0.946827	0.549317
CBV_PAM37279_c0_g1_i1	-1.53426	-0.232489	0.412521	1.35423
CBV_PAM65271_c0_g1_i1	-1.60378	-0.18453	1.21354	0.574773
CBV_PAM4541_c0_g1_i1	-1.56175	-0.277185	0.611045	1.22789
CBV_PAM40869_c0_g1_i1	-1.56655	-0.0125867	0.211922	1.36722
CBV_PAM51313_c0_g1_i1	-1.60293	0.0152947	0.275985	1.31165
CBV_PAM24228_c0_g1_i1	-1.41469	-0.58847	1.01956	0.9836
CBV_PAM43754_c0_g1_i1	-1.43973	-0.545514	1.01257	0.972678
CBV_PAM12562_c0_g1_i1	-1.79464	0.748814	0.482235	0.563588
CBV_PAM38979_c0_g1_i1	-1.32648	-0.695096	0.896647	1.12493
CBV_PAM10567_c0_g1_i1	-1.69797	0.0468722	0.997891	0.653206
CBV_PAM67967_c0_g1_i1	-1.74756	0.417512	0.381631	0.948417
CBV_PAM64879_c0_g1_i1	-1.68275	0.429437	0.149126	1.10419
CBV_PAM4225_c0_g1_i1	-1.71715	0.109587	0.767156	0.840409
CBV_PAM37441_c0_g1_i1	-1.57808	-0.188684	0.600573	1.16619
CBV_PAM24219_c2_g1_i1	-1.70989	0.0993683	0.716949	0.893576
CBV_PAM38022_c0_g1_i1	-1.69781	0.224047	1.06613	0.407637
CBV_PAM15738_c0_g1_i1	-1.34041	-0.521712	0.473308	1.38881
CBV_PAM32669_c0_g1_i1	-1.56712	-0.269305	0.974183	0.862239
CBV_PAM1029_c0_g4_i1	-1.74197	0.627515	0.268049	0.846406
CBV_PAM58360_c0_g1_i1	-1.7259	0.249379	0.536464	0.940058
CBV_PAM50904_c1_g1_i1	-1.75348	0.380966	0.540572	0.831946
CBV_PAM54144_c0_g1_i1	-1.76198	0.390607	0.710574	0.660796
CBV_PAM37436_c0_g1_i1	-1.73022	0.347071	0.919594	0.463555
CBV_PAM41531_c0_g1_i1	-1.2847	-0.701165	1.03899	0.946869
CBV_PAM43854_c0_g1_i1	-1.75187	0.467719	0.622708	0.661439
CBV_PAM30108_c0_g1_i1	-1.40142	-0.263559	0.250573	1.41441
CBV_PAM13475_c0_g1_i1	-1.55411	-0.209924	0.682995	1.08104
CBV_PAM11046_c2_g1_i1	-1.72971	0.477065	0.413997	0.838647
CBV_PAM28296_c0_g1_i1	-1.48048	-0.327081	0.621662	1.1859
CBV_PAM1402_c0_g1_i1	-1.38923	-0.476662	0.624729	1.24116
CBV_PAM11674_c1_g1_i1	-1.55092	-0.220339	0.707568	1.06369
CBV_PAM19597_c0_g1_i1	-1.54522	0.235118	0.0313072	1.27879
CBV_PAM64278_c0_g1_i1	-1.64213	0.477099	0.104012	1.06102
CBV_PAM1401_c0_g1_i1	-1.73197	0.42825	0.726688	0.577036
CBV_PAM74898_c0_g1_i1	-1.37243	-0.551307	0.921337	1.0024
CBV_PAM45560_c0_g1_i1	-1.31999	-0.443719	0.362058	1.40165
CBV_PAM42319_c0_g1_i1	-1.49134	-0.336978	1.02745	0.800876
CBV_PAM32802_c0_g1_i1	-1.6059	-0.0768439	0.749728	0.933011
CBV_PAM55207_c0_g1_i1	-1.53952	-0.0638778	0.385195	1.2182
CBV_PAM11876_c0_g1_i1	-1.36401	-0.340882	0.320777	1.38411
CBV_PAM11929_c0_g1_i1	-1.2534	-0.661173	0.693457	1.22112
CBV_PAM32527_c0_g1_i1	-1.07396	-0.571614	0.0695992	1.57597
CBV_PAM64128_c1_g2_i1	-1.57617	0.0628831	0.352447	1.16084
CBV_PAM64683_c0_g1_i1	-1.2633	-0.656523	0.765286	1.15453
CBV_PAM10931_c0_g1_i1	-1.46996	-0.185262	0.403109	1.25212
CBV_PAM65423_c0_g1_i1	-1.57377	-0.117166	0.794184	0.896746
CBV_PAM50810_c0_g1_i1	-0.946176	-0.981089	0.647778	1.27949
CBV_PAM26884_c0_g1_i1	-1.69372	0.33277	0.733246	0.627702
CBV_PAM37897_c0_g1_i1	-1.25024	-0.358919	0.126666	1.48249
CBV_PAM25274_c0_g1_i1	-1.19802	-0.697405	0.641534	1.25389
CBV_PAM1675_c0_g1_i1	-1.48573	-0.278069	0.722646	1.04116
CBV_PAM29086_c0_g1_i1	-1.46487	-0.330456	0.790035	1.00529
CBV_PAM24339_c0_g1_i1	-1.57503	0.164056	0.266856	1.14412
CBV_PAM11188_c0_g1_i1	-1.69605	0.453614	0.728702	0.513735
CBV_PAM27610_c0_g1_i1	-1.26162	-0.566002	0.53527	1.29235
CBV_PAM53819_c0_g3_i1	-1.65978	0.401845	0.351266	0.906674
CBV_PAM54635_c0_g1_i1	-1.69876	0.492662	0.584549	0.621553
CBV_PAM39104_c0_g1_i1	-1.49726	-0.13529	0.456584	1.17597
CBV_PAM27210_c0_g1_i1	-1.46333	-0.230953	0.52019	1.17409
CBV_PAM38789_c0_g1_i1	-1.57304	-0.0592694	0.768503	0.863803
CBV_PAM40177_c0_g1_i1	-1.41226	-0.154094	0.251599	1.31475
CBV_PAM41996_c1_g1_i1	-1.46521	-0.186729	0.465114	1.18682
CBV_PAM10501_c0_g1_i1	-1.56701	-0.0651116	0.80545	0.826667
CBV_PAM14828_c0_g1_i1	-1.18108	-0.640108	0.52885	1.29234
CBV_PAM21267_c0_g1_i1	-1.15828	-0.753321	0.917323	0.994278
CBV_PAM58464_c0_g1_i1	-1.19958	-0.615671	0.541075	1.27418
CBV_PAM27121_c0_g1_i1	-1.58714	0.217636	0.348177	1.02133
CBV_PAM12253_c0_g1_i1	-1.11601	-0.785967	1.07237	0.82961
CBV_PAM71075_c0_g1_i1	-1.53812	-0.0506087	0.966919	0.621807
CBV_PAM23874_c2_g1_i1	-1.6352	0.31876	0.810592	0.50585
CBV_PAM51468_c0_g2_i1	-1.30847	0.350868	-0.355242	1.31285
CBV_PAM56038_c0_g1_i1	-1.2068	-0.49227	0.331199	1.36787
CBV_PAM38347_c1_g1_i1	-1.3763	-0.390768	0.704265	1.0628
CBV_PAM48633_c0_g1_i1	-1.41806	-0.32182	1.01863	0.721258
CBV_PAM29719_c0_g1_i1	-1.54573	0.23105	0.239887	1.07479
CBV_PAM42609_c0_g1_i1	-1.23588	-0.620094	1.02591	0.830064
CBV_PAM40124_c1_g1_i1	-1.24775	-0.405802	0.29561	1.35794
CBV_PAM2078_c0_g1_i1	-1.30789	-0.518969	0.883648	0.943212
CBV_PAM57456_c0_g3_i1	-0.913222	-0.913222	0.528331	1.29811
CBV_PAM39941_c0_g1_i1	-1.39708	-0.0317076	0.143323	1.28547
CBV_PAM41071_c0_g6_i1	-1.44602	-0.121354	0.420209	1.14716
CBV_PAM51930_c0_g1_i1	-1.31124	-0.208085	0.176585	1.34274
CBV_PAM52625_c0_g1_i1	-1.39794	-0.00125621	0.126607	1.27259
CBV_PAM37401_c1_g1_i1	-1.53864	0.175837	0.33706	1.02574
CBV_PAM2350_c0_g1_i1	-1.48329	0.0989192	0.247794	1.13658
CBV_PAM2130_c0_g1_i1	-1.34058	-0.134209	0.165006	1.30979
CBV_PAM55399_c0_g1_i1	-1.40901	0.140501	0.0232434	1.24526
CBV_PAM64865_c1_g1_i1	-1.278	-0.439838	0.50357	1.21427
CBV_PAM40204_c0_g1_i1	-1.17133	-0.303507	0.0295939	1.44525
CBV_PAM37411_c0_g6_i1	-1.56838	0.273747	0.361559	0.933078
CBV_PAM60638_c0_g1_i1	-1.58556	0.222874	0.540473	0.822217
CBV_PAM20676_c0_g1_i1	-1.38579	-0.296834	1.06524	0.617385
CBV_PAM1552_c0_g1_i1	-1.31637	-0.253568	0.300773	1.26917
CBV_PAM66877_c0_g1_i1	-1.39908	-0.145357	0.376462	1.16798
CBV_PAM66095_c0_g1_i1	-1.47493	-0.124218	0.879714	0.719435
CBV_PAM65600_c0_g1_i1	-1.56889	0.352228	0.35229	0.864375
CBV_PAM54277_c0_g1_i1	-1.32568	-0.415329	0.814327	0.926685
CBV_PAM67727_c0_g1_i1	-1.56533	0.323017	0.386576	0.85574
CBV_PAM39584_c0_g1_i1	-1.35341	-0.359065	0.86618	0.846297
CBV_PAM13826_c0_g1_i1	-1.45766	-0.0973164	0.580946	0.974025
CBV_PAM590_c2_g2_i1	-1.46053	0.0741116	0.295584	1.09084
CBV_PAM11259_c2_g1_i1	-1.35827	-0.169344	0.331128	1.19648
CBV_PAM25766_c0_g1_i1	-1.45971	-0.0830081	0.571127	0.971591
CBV_PAM52417_c0_g1_i1	-1.43375	0.0782832	0.222847	1.13262
CBV_PAM51751_c1_g1_i1	-1.56202	0.318643	0.42693	0.816442
CBV_PAM66529_c0_g1_i1	-1.47376	-0.0745639	0.84864	0.699688
CBV_PAM2087_c0_g1_i1	-1.41113	-0.123401	0.449279	1.08525
CBV_PAM61847_c0_g3_i1	-1.58466	0.396786	0.517308	0.670569
CBV_PAM70404_c0_g1_i1	-1.30145	-0.420846	0.953627	0.768665
CBV_PAM1568_c0_g1_i1	-1.28223	-0.424546	0.683791	1.02298
CBV_PAM68886_c0_g1_i1	-1.34388	-0.0202304	0.136624	1.22748
CBV_PAM25930_c0_g1_i1	-0.818739	-0.967459	0.640341	1.14586
CBV_PAM17854_c0_g1_i1	-1.30665	-0.217202	0.314831	1.20902
CBV_PAM29358_c0_g1_i1	-1.40062	-0.0209895	0.328053	1.09355
CBV_PAM24672_c0_g1_i1	-1.32544	-0.196263	0.366512	1.15519
CBV_PAM26356_c1_g1_i1	-1.002	-0.691526	0.429766	1.26376
CBV_PAM70356_c0_g1_i1	-1.03894	-0.461131	0.100997	1.39907
CBV_PAM51445_c0_g1_i1	-1.27571	-0.383195	1.06145	0.597452
CBV_PAM58312_c0_g1_i1	-1.48197	0.0515588	0.822198	0.608213
CBV_PAM1416_c0_g1_i1	-1.35915	-0.0438163	0.248752	1.15421
CBV_PAM50754_c0_g1_i1	-1.51403	0.319063	0.362012	0.832956
CBV_PAM24614_c0_g1_i1	-0.966964	-0.771289	0.58979	1.14846
CBV_PAM1658_c0_g1_i1	-1.0617	-0.618688	0.472594	1.20779
CBV_PAM67548_c0_g1_i1	-1.43637	0.0928441	0.349339	0.994188
CBV_PAM56688_c0_g1_i1	-1.45765	0.0876304	0.463171	0.906851
CBV_PAM50750_c3_g1_i1	-1.25618	-0.231669	0.280195	1.20765
CBV_PAM65501_c0_g1_i1	-1.30975	0.128689	-0.0132294	1.19429
CBV_PAM13589_c0_g3_i1	-1.18232	-0.441727	0.461342	1.1627
CBV_PAM43030_c0_g1_i1	-1.37457	-0.0164091	0.309618	1.08136
CBV_PAM28491_c0_g1_i1	-1.444	-0.0155055	0.756596	0.702909
CBV_PAM77167_c0_g1_i1	-0.867521	-0.890792	0.719187	1.03913
CBV_PAM1047_c0_g2_i1	-1.27944	0.0293515	0.0276722	1.22242
CBV_PAM17241_c0_g1_i1	-1.36547	-0.0565809	0.361827	1.06023
CBV_PAM18018_c0_g1_i1	-1.01402	-0.707696	0.625682	1.09603
CBV_PAM65192_c0_g3_i1	-1.2203	-0.0706383	0.0164685	1.27447
CBV_PAM45577_c0_g1_i1	-1.22081	0.0593112	-0.106969	1.26847
CBV_PAM65289_c0_g1_i1	-1.37714	-0.0177306	0.352932	1.04194
CBV_PAM43218_c0_g1_i1	-0.825668	-0.926785	0.754444	0.998009
CBV_PAM10263_c0_g1_i1	-1.3838	-0.127342	0.879654	0.631485
CBV_PAM38481_c0_g1_i1	-0.912967	-0.845045	0.81027	0.947742
CBV_PAM11027_c0_g1_i1	-1.35822	-0.15065	0.611193	0.897676
CBV_PAM1029_c0_g8_i1	-1.43003	0.0514829	0.845121	0.533427
CBV_PAM40463_c0_g1_i1	-0.921619	-0.698704	0.372309	1.24801
CBV_PAM37328_c0_g8_i1	-1.35923	0.249753	0.0516464	1.05783
CBV_PAM39199_c1_g1_i1	-1.12511	-0.426383	0.340697	1.2108
CBV_PAM58606_c0_g1_i1	-0.861935	-0.849214	0.633819	1.07733
CBV_PAM18925_c0_g1_i1	-1.11668	-0.451706	0.369403	1.19898
CBV_PAM14406_c1_g1_i1	-1.39693	-0.0203747	0.853333	0.563973
CBV_PAM29857_c0_g1_i1	-0.98326	-0.70455	0.615683	1.07213
CBV_PAM37185_c0_g1_i1	-1.26739	-0.0940701	0.211623	1.14983
CBV_PAM11116_c1_g1_i1	-1.27769	-0.303898	0.748954	0.832638
CBV_PAM37055_c0_g1_i1	-1.42527	0.062923	0.625397	0.736951
CBV_PAM54486_c0_g1_i1	-0.995516	-0.665471	0.554591	1.1064
CBV_PAM15318_c0_g1_i1	-1.2713	-0.165208	0.339707	1.0968
CBV_PAM41585_c0_g3_i1	-1.31534	-0.193679	0.598832	0.910184
CBV_PAM73850_c0_g1_i1	-1.1521	-0.218995	0.126198	1.2449
CBV_PAM17293_c0_g1_i1	-1.38449	0.203481	0.221459	0.959547
CBV_PAM59207_c0_g1_i1	-1.03367	-0.40908	0.151498	1.29126
CBV_PAM31640_c0_g1_i1	-1.12734	-0.518625	0.730083	0.915878
CBV_PAM64484_c0_g1_i1	-1.38543	0.0393509	0.470329	0.875747
CBV_PAM50880_c1_g1_i1	-1.35164	0.000340894	0.400967	0.950331
CBV_PAM28354_c0_g1_i1	-0.926163	-0.647406	0.363233	1.21034
CBV_PAM12816_c0_g1_i1	-1.03827	-0.614277	0.678701	0.973848
CBV_PAM64883_c0_g1_i1	-1.23545	0.00628682	0.0831926	1.14597
CBV_PAM40987_c0_g1_i1	-1.28406	-0.0227309	0.253933	1.05286
CBV_PAM53381_c0_g1_i1	-1.32103	-0.121414	0.812911	0.629532
CBV_PAM24249_c1_g1_i1	-1.3801	0.118679	0.407097	0.854322
CBV_PAM25297_c0_g1_i1	-1.34341	-0.0668792	0.749628	0.660664
CBV_PAM16559_c0_g1_i1	-1.02335	-0.533114	0.418183	1.13828
CBV_PAM66490_c0_g1_i1	-1.40408	0.184664	0.464552	0.754866
CBV_PAM50898_c0_g1_i1	-1.23254	-0.281382	0.61341	0.900516
CBV_PAM871_c0_g1_i1	-1.03106	-0.449769	0.285997	1.19484
CBV_PAM53117_c0_g1_i1	-1.3506	-0.0142942	0.590863	0.774032
CBV_PAM65256_c0_g1_i1	-1.26279	-0.0337023	0.241116	1.05537
CBV_PAM40930_c0_g1_i1	-1.28699	-0.166365	0.626912	0.826446
CBV_PAM73291_c0_g1_i1	-1.19923	-0.248337	0.402852	1.04472
CBV_PAM64557_c0_g2_i1	-1.33976	0.0302191	0.434773	0.874768
CBV_PAM24541_c0_g1_i1	-1.15997	-0.318798	0.418207	1.06057
CBV_PAM28033_c0_g1_i1	-1.21613	-0.229098	0.434328	1.0109
CBV_PAM57880_c0_g1_i1	-1.24123	-0.129571	0.346476	1.02433
CBV_PAM14876_c0_g1_i1	-0.962158	-0.592708	0.432347	1.12252
CBV_PAM1603_c0_g1_i1	-1.23723	-0.163288	0.415601	0.984919
CBV_PAM42219_c0_g1_i1	-1.11007	-0.164204	0.079396	1.19488
CBV_PAM22115_c0_g1_i1	-0.967501	-0.635695	0.617536	0.98566
CBV_PAM30090_c0_g1_i1	-1.35931	0.0783582	0.715407	0.56554
CBV_PAM52024_c1_g1_i1	-1.25956	-0.173022	0.594701	0.837879
CBV_PAM24922_c0_g1_i1	-1.26757	-0.142979	0.71416	0.69639
CBV_PAM40086_c0_g1_i1	-1.23964	-0.0941397	0.378347	0.955434
CBV_PAM42204_c0_g1_i1	-1.00398	-0.192029	-0.0480309	1.24404
CBV_PAM38208_c0_g1_i1	-1.10304	-0.41013	0.637674	0.875498
CBV_PAM52778_c0_g1_i1	-1.10758	-0.35205	0.476438	0.983188
CBV_PAM4052_c1_g1_i1	-1.29155	-0.0060777	0.637607	0.660018
CBV_PAM18659_c0_g1_i1	-1.2147	-0.195299	0.69893	0.711074
CBV_PAM61941_c0_g1_i1	-0.992361	-0.463652	0.384486	1.07153
CBV_PAM10968_c0_g1_i1	-1.08552	-0.281808	0.297574	1.06975
CBV_PAM7318_c0_g1_i1	-1.08808	-0.415091	0.727433	0.775741
CBV_PAM24137_c0_g1_i1	-1.2066	-0.0859332	0.347325	0.945208
CBV_PAM56_c1_g1_i1	-1.13652	-0.328525	0.726565	0.73848
CBV_PAM42283_c1_g1_i1	-1.0311	-0.350936	0.287277	1.09476
CBV_PAM48096_c0_g1_i1	-1.03654	-0.417784	0.446805	1.00752
CBV_PAM72904_c0_g1_i1	-1.06978	-0.363265	0.435836	0.997207
CBV_PAM52024_c0_g1_i1	-1.21379	-0.143344	0.555168	0.80197
CBV_PAM44408_c0_g1_i1	-1.16309	-0.255107	0.712269	0.705924
CBV_PAM28846_c0_g1_i1	-1.16249	-0.129688	0.330393	0.961783
CBV_PAM12388_c0_g1_i1	-1.23166	-0.0494551	0.534212	0.746907
CBV_PAM18713_c0_g1_i1	-1.0444	-0.416977	0.623613	0.83776
CBV_PAM54916_c0_g1_i1	-1.10685	-0.267848	0.487306	0.887388
CBV_PAM38283_c0_g2_i1	-1.10334	-0.299686	0.684612	0.718417
CBV_PAM66923_c0_g1_i1	-0.896885	-0.490663	0.344293	1.04326

## Sheet: Subcluster5
Additional file 6. Expression subcluster matrix. Values of Trinity gene expression (TPM-TMM) for 15 subclusters identified by gene expression cluster analysis during fruit developmental stages (150, 240, 300 and 390 days after fruit set; DAFS) in Persea americana cv. Hass.
Trinity genes	150-DAFS	240-DAFS	300-DAFS	390-DAFS
CBV_PAM50818_c1_g7_i1	0.206761	-0.658475	-1.7313	2.18301
CBV_PAM40977_c0_g1_i1	0.833704	-0.258842	-2.09773	1.52287
CBV_PAM38035_c0_g1_i1	0.684077	-0.00122191	-2.18036	1.49751
CBV_PAM51034_c0_g2_i1	0.565452	-1.32606	-1.17876	1.93938
CBV_PAM39749_c1_g1_i1	0.412812	-0.925561	-1.48208	1.99483
CBV_PAM11223_c1_g1_i1	0.58416	-1.00488	-1.44653	1.86725
CBV_PAM51009_c0_g1_i1	-0.0560831	0.100169	-1.8771	1.83301
CBV_PAM68163_c0_g1_i1	0.371469	-0.953979	-1.37077	1.95328
CBV_PAM52791_c0_g1_i1	0.670956	-1.27296	-1.17155	1.77355
CBV_PAM69688_c0_g1_i1	1.32482	-0.333276	-1.87531	0.883767
CBV_PAM3256_c0_g1_i1	0.799956	0.442564	-2.03865	0.796128
CBV_PAM3750_c0_g1_i1	1.2548	-0.269282	-1.79325	0.807734
CBV_PAM32030_c0_g1_i1	0.788305	-0.542803	-1.62461	1.37911
CBV_PAM52223_c0_g1_i1	0.870883	-0.98195	-1.22617	1.33724
CBV_PAM51448_c0_g2_i1	1.01666	-1.06671	-1.1544	1.20445
CBV_PAM24606_c0_g4_i1	0.605167	0.605334	-1.92351	0.71301
CBV_PAM39646_c0_g1_i1	0.806562	-0.196403	-1.71584	1.10568
CBV_PAM30200_c0_g1_i1	0.471614	-1.05622	-0.99031	1.57491
CBV_PAM25389_c0_g1_i1	0.251382	-1.62978	-0.0190466	1.39745
CBV_PAM37509_c0_g1_i1	0.464568	-1.118	-0.887623	1.54105
CBV_PAM10465_c0_g3_i1	-0.0143996	-0.280919	-1.35066	1.64598
CBV_PAM35177_c0_g1_i1	0.122658	-1.07751	-0.730291	1.68514
CBV_PAM10465_c0_g5_i1	0.0856901	-0.879605	-0.879605	1.67352
CBV_PAM65937_c0_g7_i1	0.575127	-1.57748	-0.204933	1.20729
CBV_PAM56379_c0_g1_i1	-0.13963	0.202545	-1.47487	1.41196
CBV_PAM51009_c0_g3_i1	0.706257	-1.67644	0.0866106	0.88357
CBV_PAM52318_c0_g1_i1	0.176193	-0.850485	-0.901105	1.5754
CBV_PAM53926_c0_g1_i1	0.860171	-0.562732	-1.35227	1.05484
CBV_PAM1182_c0_g1_i1	0.635354	-0.916634	-0.975825	1.2571
CBV_PAM10625_c0_g3_i1	0.9141	-1.32161	-0.529327	0.936835
CBV_PAM13886_c0_g1_i1	0.797651	-0.958938	-0.958938	1.12022
CBV_PAM23777_c0_g1_i1	0.0563545	-0.917155	-0.680298	1.5411
CBV_PAM19592_c0_g1_i1	0.282113	-0.809337	-0.901098	1.42832
CBV_PAM68000_c0_g1_i1	0.333038	-1.09399	-0.612467	1.37342
CBV_PAM29488_c0_g1_i1	-0.0371119	-0.539027	-0.951907	1.52805
CBV_PAM12970_c1_g1_i1	1.12981	-0.52841	-1.24589	0.644493
CBV_PAM64946_c0_g1_i1	0.622654	-1.13201	-0.661539	1.17089
CBV_PAM741_c0_g1_i1	0.677584	-1.32277	-0.404903	1.05009
CBV_PAM13253_c0_g1_i1	0.736938	-0.130315	-1.46469	0.858063
CBV_PAM37351_c0_g2_i1	0.336029	-0.0771799	-1.40833	1.14949
CBV_PAM1397_c0_g1_i1	0.828879	-0.438236	-1.293	0.902357
CBV_PAM68227_c0_g1_i1	0.00667695	-0.629745	-0.855094	1.47816
CBV_PAM67535_c0_g1_i1	0.775768	-0.900181	-0.900181	1.02459
CBV_PAM10486_c1_g1_i1	-0.127927	-0.400108	-0.948585	1.47662
CBV_PAM39141_c0_g1_i1	-0.0852697	-0.265806	-1.0709	1.42198
CBV_PAM64822_c0_g1_i1	0.123165	-0.226317	-1.20475	1.30791
CBV_PAM10772_c1_g1_i1	0.291719	-0.472606	-1.11388	1.29477
CBV_PAM48637_c0_g1_i1	0.987596	-0.100407	-1.40037	0.513185
CBV_PAM1233_c0_g1_i1	0.816567	-0.567309	-1.16935	0.920088
CBV_PAM65434_c0_g1_i1	0.675273	-0.294737	-1.30257	0.922035
CBV_PAM1110_c0_g1_i1	-0.133644	-0.255908	-1.00848	1.39804
CBV_PAM65361_c0_g1_i1	-0.0893372	-0.238124	-1.04684	1.3743
CBV_PAM23732_c0_g1_i1	-0.0461007	-0.665749	-0.71143	1.42328
CBV_PAM878_c1_g1_i1	0.277404	0.0473635	-1.35248	1.02771
CBV_PAM54321_c0_g2_i1	0.451738	-0.391284	-1.1699	1.10944
CBV_PAM10465_c0_g7_i1	-0.048166	-0.592872	-0.771219	1.41226
CBV_PAM15112_c0_g1_i1	0.694807	-0.608822	-1.06166	0.975677
CBV_PAM69215_c0_g1_i1	-0.261666	-0.236104	-0.907827	1.4056
CBV_PAM52331_c0_g1_i1	0.0214242	-0.548707	-0.844785	1.37207
CBV_PAM43037_c0_g1_i1	0.654745	-0.287833	-1.25259	0.885678
CBV_PAM52792_c0_g1_i1	0.452664	-1.00739	-0.582688	1.13741
CBV_PAM13609_c0_g1_i1	1.04126	-0.231958	-1.23672	0.427422
CBV_PAM38074_c1_g1_i1	0.549875	-0.821612	-0.820937	1.09267
CBV_PAM26555_c0_g1_i1	0.192277	-0.570368	-0.903913	1.282
CBV_PAM39760_c0_g1_i1	0.965677	-0.674671	-0.975326	0.68432
CBV_PAM12335_c0_g1_i1	0.161631	-1.20463	-0.102165	1.14517
CBV_PAM2267_c0_g1_i1	0.52323	-0.805141	-0.816323	1.09823
CBV_PAM65181_c0_g1_i1	1.0189	-1.05518	-0.533783	0.57006
CBV_PAM14378_c0_g1_i1	-0.169902	0.194473	-1.17188	1.14731
CBV_PAM1611_c0_g1_i1	0.13521	-0.0543368	-1.20071	1.11984
CBV_PAM53979_c0_g1_i1	0.518994	-1.10784	-0.42666	1.01551
CBV_PAM24861_c0_g1_i1	0.325804	-1.16135	-0.238869	1.07442
CBV_PAM29855_c0_g1_i1	0.931597	-0.619856	-0.980036	0.668295
CBV_PAM27889_c0_g1_i1	0.597559	-0.429359	-1.10651	0.938307
CBV_PAM53916_c0_g2_i1	0.0961404	-0.0938942	-1.14675	1.1445
CBV_PAM14711_c0_g1_i1	0.478892	-0.839013	-0.723266	1.08339
CBV_PAM25851_c1_g1_i1	0.506973	-0.374005	-1.11519	0.982224
CBV_PAM61369_c0_g1_i1	-0.136654	-0.180371	-0.959656	1.27668
CBV_PAM42094_c0_g1_i1	0.479161	-0.40918	-1.07992	1.00994
CBV_PAM1813_c1_g1_i1	0.159378	-0.220166	-1.08509	1.14588
CBV_PAM2513_c0_g5_i1	0.0757629	0.217717	-1.25037	0.956892
CBV_PAM10425_c1_g1_i1	0.533714	-0.826948	-0.723202	1.01644
CBV_PAM76921_c0_g1_i1	-0.0826234	-0.556746	-0.676697	1.31607
CBV_PAM27117_c0_g1_i1	-0.0905919	-0.0604669	-1.03741	1.18847
CBV_PAM65262_c0_g1_i1	0.757919	-1.21223	-0.186925	0.641233
CBV_PAM1076_c0_g1_i1	0.492059	-0.558204	-0.94882	1.01496
CBV_PAM37591_c0_g1_i1	0.378868	-1.20219	-0.114505	0.937827
CBV_PAM38119_c0_g1_i1	0.907462	-0.126296	-1.20367	0.422504
CBV_PAM28312_c0_g1_i1	-0.143497	-0.554037	-0.624837	1.32237
CBV_PAM23625_c0_g1_i1	-0.239112	-0.0118739	-0.964135	1.21512
CBV_PAM37768_c0_g1_i1	-0.254351	-0.46242	-0.621213	1.33798
CBV_PAM23666_c4_g1_i1	0.73578	-0.621443	-0.928166	0.813829
CBV_PAM26676_c0_g1_i1	-0.0709724	-0.277162	-0.896505	1.24464
CBV_PAM57525_c0_g1_i1	0.201517	-0.537589	-0.841474	1.17755
CBV_PAM37450_c0_g1_i1	-0.174286	0.112832	-1.05885	1.12031
CBV_PAM33283_c0_g1_i1	0.824506	0.0630975	-1.25655	0.368944
CBV_PAM63838_c0_g1_i1	0.212549	-0.517065	-0.855655	1.16017
CBV_PAM50881_c1_g1_i1	0.67905	-0.474161	-1.01833	0.81344
CBV_PAM10233_c0_g6_i1	0.462461	-0.101637	-1.18435	0.823524
CBV_PAM43929_c0_g1_i1	0.380466	-0.349477	-1.02157	0.990584
CBV_PAM70935_c0_g1_i1	-0.276138	-0.341531	-0.667745	1.28541
CBV_PAM65710_c2_g1_i1	-0.037184	-0.892553	-0.260767	1.1905
CBV_PAM30424_c0_g1_i1	0.937472	-0.537827	-0.907433	0.507788
CBV_PAM46573_c0_g1_i1	0.51001	-0.734693	-0.730596	0.955279
CBV_PAM38442_c0_g1_i1	0.907644	-0.513042	-0.930663	0.536061
CBV_PAM51400_c0_g2_i1	0.839539	-1.2041	0.107592	0.256971
CBV_PAM20287_c0_g1_i1	0.432102	-0.34861	-1.02161	0.938117
CBV_PAM3275_c0_g1_i1	0.0448995	-0.0375552	-1.05213	1.04478
CBV_PAM10854_c0_g1_i1	0.0778917	0.135472	-1.14432	0.930952
CBV_PAM70189_c0_g1_i1	0.13422	-0.326905	-0.914312	1.107
CBV_PAM24163_c0_g1_i1	0.0799072	-0.446442	-0.793544	1.16008
CBV_PAM9800_c0_g1_i1	-0.282807	-0.188482	-0.748245	1.21953
CBV_PAM11978_c0_g1_i1	0.0448885	-0.242913	-0.919682	1.11771
CBV_PAM1009_c0_g5_i1	0.318906	-0.685641	-0.685641	1.05238
CBV_PAM37271_c0_g8_i1	0.045662	0.0927812	-1.09134	0.952901
CBV_PAM26216_c1_g1_i1	0.613196	-0.745298	-0.697298	0.8294
CBV_PAM39917_c0_g1_i1	-0.0629602	-0.130575	-0.917129	1.11066
CBV_PAM25028_c1_g1_i1	0.107115	0.159302	-1.13614	0.86972
CBV_PAM69824_c0_g1_i1	0.35949	-0.562063	-0.792886	0.995458
CBV_PAM25361_c0_g2_i1	0.0819129	-0.612548	-0.612548	1.14318
CBV_PAM30129_c0_g1_i1	0.230735	-0.57261	-0.728035	1.06991
CBV_PAM61785_c0_g1_i1	0.0909544	-0.653399	-0.571808	1.13425
CBV_PAM64187_c6_g1_i1	-0.0858336	0.465624	-1.12381	0.744016
CBV_PAM14223_c0_g1_i1	0.387051	-0.219224	-1.03933	0.871508
CBV_PAM64963_c0_g1_i1	-0.269852	-0.393296	-0.55698	1.22013
CBV_PAM29491_c0_g1_i1	0.394232	-0.47529	-0.864781	0.945839
CBV_PAM10631_c0_g3_i1	0.45045	-1.17949	0.0809299	0.648112
CBV_PAM44016_c0_g1_i1	-0.467687	-0.131649	-0.595369	1.19471
CBV_PAM12156_c0_g1_i1	0.036649	-0.412506	-0.752524	1.12838
CBV_PAM38315_c0_g1_i1	0.0496749	-0.345753	-0.809859	1.10594
CBV_PAM27772_c0_g5_i1	0.292509	0.44753	-1.21784	0.4778
CBV_PAM56619_c0_g1_i1	-0.165239	-0.438167	-0.590444	1.19385
CBV_PAM13925_c0_g1_i1	0.304678	-0.120794	-1.05709	0.873208
CBV_PAM25767_c0_g3_i1	0.174404	0.472863	-1.19462	0.547357
CBV_PAM12429_c0_g1_i1	-0.0238304	-0.836759	-0.239179	1.09977
CBV_PAM67582_c0_g1_i1	-0.290465	-0.331649	-0.571758	1.19387
CBV_PAM52097_c1_g1_i1	0.709022	-0.638503	-0.753794	0.683276
CBV_PAM64201_c0_g7_i1	-0.331974	0.032493	-0.795897	1.09538
CBV_PAM42223_c0_g1_i1	0.00841327	-0.472325	-0.665578	1.12949
CBV_PAM26853_c0_g1_i1	-0.1868	-0.551359	-0.446543	1.1847
CBV_PAM67001_c0_g1_i1	0.164566	-0.361366	-0.834812	1.03161
CBV_PAM18894_c0_g1_i1	-0.155095	-0.190072	-0.774359	1.11953
CBV_PAM27196_c0_g1_i1	0.0465098	0.341827	-1.11549	0.727154
CBV_PAM69180_c0_g1_i1	0.38083	-0.415426	-0.869693	0.904289
CBV_PAM65351_c1_g1_i1	0.775519	-0.513861	-0.834297	0.572639
CBV_PAM15955_c1_g1_i1	-0.149979	-0.201683	-0.762509	1.11417
CBV_PAM64496_c0_g10_i1	0.449906	-0.673263	-0.659231	0.882588
CBV_PAM69199_c0_g1_i1	-0.188428	-0.288565	-0.66603	1.14302
CBV_PAM1057_c0_g1_i1	0.65838	-0.399362	-0.916157	0.657139
CBV_PAM66692_c0_g1_i1	-0.196353	-0.0266348	-0.836781	1.05977
CBV_PAM65899_c1_g1_i1	0.611651	-0.883253	-0.44249	0.714092
CBV_PAM67096_c0_g1_i1	-0.000698713	-0.525197	-0.585277	1.11117
CBV_PAM2115_c0_g1_i1	0.0841722	0.0882387	-1.03906	0.866648
CBV_PAM11061_c1_g1_i1	-0.199538	-0.0775039	-0.79981	1.07685
CBV_PAM11146_c0_g1_i1	0.307174	-0.0191987	-1.06609	0.778114
CBV_PAM56775_c0_g2_i1	0.669569	-0.128047	-1.04252	0.500993
CBV_PAM26593_c0_g1_i1	0.417501	-1.01259	-0.16053	0.755617
CBV_PAM64646_c0_g5_i1	0.564273	-0.190699	-1.01488	0.641303
CBV_PAM67042_c0_g1_i1	0.0740779	-0.222136	-0.855162	1.00322
CBV_PAM2788_c0_g1_i1	-0.108398	-0.223176	-0.748339	1.07991
CBV_PAM8801_c0_g1_i1	-0.0839148	-0.462563	-0.568331	1.11481
CBV_PAM24196_c0_g1_i1	-0.134474	-0.368366	-0.612539	1.11538
CBV_PAM1749_c1_g1_i1	-0.322954	-0.209209	-0.590213	1.12238
CBV_PAM47117_c0_g1_i1	-0.165561	-0.316663	-0.626703	1.10893
CBV_PAM39_c0_g1_i1	0.661119	-0.143463	-1.01088	0.493225
CBV_PAM39536_c0_g1_i1	0.526613	-0.577669	-0.719523	0.770579
CBV_PAM67895_c0_g1_i1	0.424885	-0.0565148	-1.03969	0.671323
CBV_PAM42960_c0_g1_i1	0.381985	-0.480894	-0.766704	0.865613
CBV_PAM53197_c0_g1_i1	0.398233	0.201129	-1.11628	0.516913
CBV_PAM53927_c0_g1_i1	0.682137	-0.925147	-0.302345	0.545355
CBV_PAM5261_c0_g1_i1	0.327611	-0.669387	-0.567174	0.908949
CBV_PAM68909_c0_g1_i1	-0.0575875	-0.10603	-0.833427	0.997045
CBV_PAM30712_c0_g1_i1	-0.262122	-0.205405	-0.626514	1.09404
CBV_PAM1694_c0_g1_i1	-0.245823	-0.293839	-0.568752	1.10841
CBV_PAM10227_c0_g30_i1	0.41788	-0.0621382	-1.03085	0.675104
CBV_PAM23685_c0_g1_i1	0.769759	-0.663013	-0.622701	0.515955
CBV_PAM23631_c0_g1_i1	0.512224	0.0130334	-1.06077	0.53551
CBV_PAM52917_c0_g1_i1	-0.135585	-0.445373	-0.508981	1.08994
CBV_PAM17051_c0_g1_i1	-0.165825	-0.372242	-0.553409	1.09148
CBV_PAM22203_c0_g1_i1	0.709799	-0.59056	-0.693086	0.573848
CBV_PAM28017_c0_g1_i1	0.211344	-0.497256	-0.671252	0.957164
CBV_PAM21988_c0_g1_i1	0.775409	-0.555007	-0.709704	0.489303
CBV_PAM10323_c1_g1_i1	-0.0536427	-0.399758	-0.604038	1.05744
CBV_PAM37771_c0_g1_i1	0.439408	-0.561544	-0.687844	0.809981
CBV_PAM2051_c0_g1_i1	0.42602	0.02503	-1.04735	0.596297
CBV_PAM1029_c0_g10_i1	0.268633	-0.595505	-0.595505	0.922376
CBV_PAM65716_c0_g1_i1	0.277208	-0.485711	-0.698081	0.906585
CBV_PAM27067_c0_g1_i1	-0.325325	-0.237293	-0.522921	1.08554
CBV_PAM12464_c0_g1_i1	0.577015	-0.454232	-0.791337	0.668554
CBV_PAM65032_c1_g1_i1	0.101508	0.0973025	-0.984783	0.785972
CBV_PAM27367_c0_g1_i1	0.298331	-0.0931592	-0.965053	0.759881
CBV_PAM53935_c0_g1_i1	-0.166108	0.132103	-0.860693	0.894698
CBV_PAM11037_c2_g1_i1	0.768164	-0.484003	-0.7427	0.458538
CBV_PAM38480_c0_g1_i1	0.365633	-0.452967	-0.742726	0.83006
CBV_PAM753_c0_g1_i1	0.666702	-0.244672	-0.913131	0.491101
CBV_PAM43437_c0_g2_i1	-0.0863357	-0.3858	-0.572449	1.04458
CBV_PAM54044_c1_g1_i1	-0.162364	0.133799	-0.857886	0.886451
CBV_PAM14303_c0_g1_i1	0.558532	-0.792421	-0.429357	0.663246
CBV_PAM74768_c0_g1_i1	-0.0720077	-0.470645	-0.499504	1.04216
CBV_PAM29349_c0_g1_i1	0.626961	-0.15624	-0.953546	0.482825
CBV_PAM65217_c0_g1_i1	0.408302	-0.154306	-0.943886	0.689889
CBV_PAM74203_c0_g1_i1	0.58051	0.192808	-1.05115	0.277828
CBV_PAM63073_c0_g1_i1	-0.204317	-0.246779	-0.595858	1.04695
CBV_PAM1566_c0_g1_i1	-0.170811	-0.0839292	-0.73412	0.988861
CBV_PAM40078_c0_g1_i1	0.337064	-0.470989	-0.709687	0.843612
CBV_PAM66435_c1_g1_i1	0.49009	-0.964617	-0.124596	0.599122
CBV_PAM52637_c0_g1_i1	-0.217472	-0.422676	-0.42398	1.06413
CBV_PAM67929_c0_g1_i1	-0.291337	-0.349038	-0.429417	1.06979
CBV_PAM21382_c0_g1_i1	0.656374	-0.715134	-0.513626	0.572386
CBV_PAM28026_c0_g1_i1	0.698428	-0.313105	-0.843212	0.45789
CBV_PAM41122_c0_g1_i1	0.533963	0.0625566	-1.01775	0.421228
CBV_PAM75846_c0_g1_i1	-0.139938	-0.359894	-0.533437	1.03327
CBV_PAM24661_c0_g1_i1	-0.040666	-0.519462	-0.452266	1.01239
CBV_PAM53338_c1_g1_i1	0.154864	-0.166232	-0.841679	0.853047
CBV_PAM66031_c0_g1_i1	0.623057	-0.132607	-0.938433	0.447984
CBV_PAM62627_c0_g1_i1	0.0166301	-0.0588594	-0.838177	0.880407
CBV_PAM51329_c2_g1_i1	-0.0362382	-0.468667	-0.498248	1.00315
CBV_PAM14535_c0_g1_i1	0.706772	-0.253819	-0.859191	0.406238
CBV_PAM51386_c0_g1_i1	0.592743	-0.387647	-0.788413	0.583317
CBV_PAM37671_c1_g1_i1	-0.247956	-0.284619	-0.500872	1.03345
CBV_PAM23655_c0_g1_i1	0.392757	-0.812857	-0.316001	0.736101
CBV_PAM382_c0_g1_i1	-0.181591	-0.309775	-0.528926	1.02029
CBV_PAM45282_c0_g1_i1	-0.205292	-0.289301	-0.527735	1.02233
CBV_PAM65470_c0_g2_i1	-0.011484	-0.487174	-0.487174	0.985832
CBV_PAM24153_c2_g1_i1	0.668983	-0.151098	-0.900092	0.382206
CBV_PAM61853_c0_g1_i1	-0.239243	-0.284426	-0.493862	1.01753
CBV_PAM4278_c0_g1_i1	-0.0932408	-0.336539	-0.5599	0.989679
CBV_PAM40709_c1_g1_i1	0.156033	-0.444143	-0.614159	0.902268
CBV_PAM63015_c0_g1_i1	-0.196871	-0.457114	-0.3607	1.01468
CBV_PAM26067_c0_g1_i1	0.702205	-0.552872	-0.620593	0.47126
CBV_PAM56321_c0_g1_i1	0.184228	-0.208049	-0.802521	0.826342
CBV_PAM44800_c0_g1_i1	0.0935874	0.564951	-0.984587	0.326049
CBV_PAM24975_c0_g1_i1	-0.0757428	-0.283262	-0.611071	0.970076
CBV_PAM10704_c0_g1_i1	-0.0341566	-0.140359	-0.735644	0.91016
CBV_PAM17556_c0_g1_i1	0.177345	-0.760209	-0.259005	0.841869
CBV_PAM65321_c0_g1_i1	0.45737	-0.929234	-0.0684823	0.540346
CBV_PAM37424_c0_g1_i1	0.202741	-0.248482	-0.771144	0.816884
CBV_PAM37834_c0_g1_i1	-0.13009	0.236423	-0.854396	0.748063
CBV_PAM16655_c0_g1_i1	0.178415	-0.58196	-0.468842	0.872387
CBV_PAM64201_c0_g6_i1	0.075707	-0.277717	-0.687374	0.889384
CBV_PAM16692_c0_g1_i1	0.202832	-0.535103	-0.527892	0.860163
CBV_PAM8139_c0_g1_i1	-0.00195928	-0.274915	-0.645368	0.922242
CBV_PAM46465_c0_g1_i1	-0.0697344	-0.442563	-0.451957	0.964254
CBV_PAM37664_c0_g2_i1	0.217082	-0.538683	-0.526674	0.848275
CBV_PAM37202_c0_g1_i1	0.661332	-0.200833	-0.838548	0.378049
CBV_PAM64025_c0_g1_i1	0.729886	-0.221837	-0.802317	0.294268
CBV_PAM38732_c0_g1_i1	0.373559	-0.155777	-0.856826	0.639044
CBV_PAM52978_c1_g1_i1	0.101965	-0.609514	-0.372096	0.879645
CBV_PAM56124_c0_g1_i1	0.479915	-0.454641	-0.666843	0.641568
CBV_PAM68180_c0_g1_i1	0.557151	-0.0586696	-0.901752	0.403271
CBV_PAM64578_c0_g1_i1	0.0426776	-0.0551132	-0.79144	0.803876
CBV_PAM39168_c0_g1_i1	-0.199234	-0.336781	-0.432121	0.968136
CBV_PAM14337_c0_g1_i1	0.481232	0.0926707	-0.946529	0.372627
CBV_PAM1956_c0_g1_i1	0.477982	-0.638288	-0.477568	0.637874
CBV_PAM65182_c1_g2_i1	-0.187164	0.413915	-0.83352	0.606768
CBV_PAM24262_c1_g1_i1	0.357615	-0.54841	-0.540201	0.730996
CBV_PAM62310_c0_g1_i1	0.195662	0.0267222	-0.882014	0.659629
CBV_PAM50976_c1_g1_i1	-0.00518624	-0.119505	-0.714711	0.839402
CBV_PAM17616_c1_g1_i1	0.431651	-0.743401	-0.314265	0.626015
CBV_PAM43006_c0_g1_i1	0.312409	-0.390377	-0.658953	0.736922
CBV_PAM10206_c1_g1_i1	0.0247042	-0.638574	-0.252689	0.866558
CBV_PAM52396_c0_g1_i1	0.0437995	-0.524619	-0.399663	0.880483
CBV_PAM4723_c1_g1_i1	0.370871	-0.173228	-0.81346	0.615817
CBV_PAM51000_c2_g1_i1	0.337094	-0.257807	-0.752822	0.673535
CBV_PAM13088_c0_g1_i1	-0.115171	-0.18721	-0.592397	0.894778
CBV_PAM59460_c0_g1_i1	0.641946	-0.733432	-0.301883	0.39337
CBV_PAM59313_c0_g1_i1	-0.11902	-0.192065	-0.58141	0.892495
CBV_PAM13483_c1_g1_i1	-0.235016	-0.162525	-0.516022	0.913563
CBV_PAM137_c0_g1_i1	0.398959	-0.298016	-0.73159	0.630646
CBV_PAM37993_c0_g1_i1	0.23565	0.10456	-0.896039	0.555829
CBV_PAM65012_c0_g1_i1	0.362062	-0.558717	-0.497586	0.694241
CBV_PAM10967_c0_g1_i1	0.0933524	-0.637521	-0.279214	0.823383
CBV_PAM26102_c0_g1_i1	-0.130391	-0.281665	-0.491226	0.903283
CBV_PAM64645_c0_g1_i1	0.60262	-0.0730188	-0.830229	0.300628
CBV_PAM51862_c1_g1_i1	0.578384	-0.0429416	-0.840455	0.305012
CBV_PAM24775_c0_g1_i1	0.673441	-0.423801	-0.608911	0.359271
CBV_PAM52190_c0_g1_i1	0.305484	-0.530797	-0.49189	0.717203
CBV_PAM1069_c0_g1_i1	-0.108743	-0.254757	-0.518657	0.882157
CBV_PAM8788_c0_g1_i1	0.208677	-0.389676	-0.583524	0.764523
CBV_PAM70460_c0_g1_i1	-0.17349	0.0484749	-0.672169	0.797184
CBV_PAM28914_c0_g1_i1	0.625104	-0.173943	-0.770326	0.319166
CBV_PAM67527_c0_g1_i1	-0.0284822	-0.482368	-0.355463	0.866314
CBV_PAM24430_c1_g1_i1	0.0182979	-0.298848	-0.559847	0.840398
CBV_PAM24891_c0_g1_i1	-0.0106553	0.275347	-0.838479	0.573788
CBV_PAM1142_c3_g1_i1	0.393654	-0.0675899	-0.830826	0.504762
CBV_PAM3295_c0_g1_i1	-0.0355999	0.0200445	-0.734445	0.750001
CBV_PAM44115_c0_g1_i1	-0.0832878	-0.28595	-0.501517	0.870755
CBV_PAM52604_c0_g1_i1	-0.0122914	0.0473008	-0.756795	0.721786
CBV_PAM50710_c0_g1_i1	0.0923305	-0.122226	-0.716907	0.746802
CBV_PAM64172_c0_g1_i1	0.492515	-0.536865	-0.507291	0.55164
CBV_PAM64253_c0_g2_i1	-0.0889269	0.286332	-0.794493	0.597088
CBV_PAM25794_c0_g1_i1	0.261221	-0.314133	-0.647721	0.700632
CBV_PAM46137_c0_g1_i1	0.116019	-0.592998	-0.305287	0.782266
CBV_PAM10261_c2_g1_i1	0.0475934	-0.424043	-0.449774	0.826224
CBV_PAM62093_c0_g1_i1	-0.0124908	-0.00595904	-0.720666	0.739116
CBV_PAM64964_c0_g1_i1	0.0850312	-0.411629	-0.478867	0.805464
CBV_PAM64855_c0_g1_i1	0.0793628	-0.393534	-0.49259	0.806761
CBV_PAM67852_c0_g1_i1	0.0954201	-0.351128	-0.535603	0.791311
CBV_PAM44065_c0_g1_i1	0.0420405	-0.51407	-0.339677	0.811707
CBV_PAM51079_c0_g1_i1	0.580406	-0.359637	-0.634131	0.413361
CBV_PAM12014_c0_g1_i1	0.166214	-0.0335424	-0.77357	0.640898
CBV_PAM66875_c0_g1_i1	0.0228093	-0.253773	-0.568447	0.79941
CBV_PAM38710_c0_g1_i1	0.205456	-0.36902	-0.560799	0.724363
CBV_PAM50712_c3_g1_i1	0.417841	-0.0550431	-0.803251	0.440453
CBV_PAM29958_c0_g1_i1	-0.0737285	-0.376261	-0.393992	0.843982
CBV_PAM4340_c0_g1_i1	0.514214	-0.25859	-0.69087	0.435246
CBV_PAM64259_c0_g2_i1	-0.127362	-0.126376	-0.555533	0.809271
CBV_PAM28962_c0_g1_i1	0.283065	0.0129176	-0.806149	0.510166
CBV_PAM1204_c3_g1_i1	0.543684	-0.433563	-0.555207	0.445087
CBV_PAM51852_c0_g1_i1	0.0932442	-0.029883	-0.730987	0.667626
CBV_PAM67573_c0_g1_i1	-0.13044	-0.32027	-0.394384	0.845094
CBV_PAM10793_c1_g1_i1	0.365271	0.232014	-0.856493	0.259209
CBV_PAM1911_c0_g1_i1	-0.162096	-0.058639	-0.572983	0.793717
CBV_PAM27428_c0_g1_i1	0.183817	0.080731	-0.804094	0.539546
CBV_PAM436_c0_g1_i1	0.440582	-0.331903	-0.631178	0.5225
CBV_PAM67796_c0_g1_i1	0.293228	-0.538037	-0.407609	0.652418
CBV_PAM51340_c1_g1_i1	0.388225	-0.196768	-0.711623	0.520166
CBV_PAM25087_c0_g1_i1	0.123088	-0.0561267	-0.719678	0.652717
CBV_PAM54411_c0_g1_i1	0.183079	-0.026009	-0.753078	0.596008
CBV_PAM56139_c0_g1_i1	-0.0951606	-0.0450612	-0.609596	0.749817
CBV_PAM50759_c0_g5_i1	0.0189486	-0.401461	-0.401461	0.783974
CBV_PAM2617_c0_g1_i1	-0.132868	0.0218351	-0.620113	0.731146
CBV_PAM37303_c1_g1_i1	0.410016	0.0873934	-0.81249	0.315081
CBV_PAM24164_c1_g1_i1	0.188382	-0.0288213	-0.739751	0.580191
CBV_PAM38255_c0_g2_i1	-0.109782	-0.0335309	-0.596714	0.740027
CBV_PAM13978_c0_g1_i1	0.317515	-0.388867	-0.534938	0.60629
CBV_PAM1281_c0_g1_i1	0.502745	-0.444932	-0.504758	0.446945
CBV_PAM72672_c0_g1_i1	0.13102	-0.544412	-0.293117	0.706508
CBV_PAM58510_c0_g1_i1	-0.145111	0.377028	-0.710682	0.478764
CBV_PAM3624_c0_g1_i1	0.193385	-0.510869	-0.363531	0.681016
CBV_PAM10662_c0_g1_i1	-0.00497772	-0.298406	-0.463911	0.767295
CBV_PAM39816_c0_g1_i1	-0.0211768	-0.109311	-0.593455	0.723944
CBV_PAM877_c1_g1_i1	0.14246	-0.414325	-0.434974	0.706839
CBV_PAM23670_c0_g1_i1	0.231791	-0.505422	-0.376411	0.650043
CBV_PAM73629_c0_g1_i1	0.557968	-0.188061	-0.66342	0.293513
CBV_PAM51403_c0_g1_i1	0.378263	-0.0415039	-0.745272	0.408513
CBV_PAM1358_c0_g12_i1	0.0508356	-0.394211	-0.394211	0.737587
CBV_PAM37187_c0_g1_i1	0.473457	-0.300852	-0.599162	0.426557
CBV_PAM14130_c0_g1_i1	0.334676	-0.536447	-0.362591	0.564363
CBV_PAM37411_c0_g10_i1	0.296825	-0.315772	-0.562229	0.581176
CBV_PAM51245_c1_g1_i1	0.475978	-0.100081	-0.704136	0.32824
CBV_PAM64183_c1_g2_i1	0.0288705	-0.388351	-0.376801	0.736281
CBV_PAM2387_c0_g1_i1	0.1767	-0.032292	-0.701723	0.557315
CBV_PAM64443_c0_g1_i1	0.0681818	0.0832733	-0.71172	0.560265
CBV_PAM65702_c0_g1_i1	0.63906	-0.428865	-0.428865	0.218671
CBV_PAM14809_c1_g1_i1	0.352744	0.0644665	-0.757289	0.340079
CBV_PAM10852_c0_g1_i1	0.213331	-0.450618	-0.400609	0.637897
CBV_PAM54193_c0_g1_i1	-0.0142661	-0.0627965	-0.597342	0.674405
CBV_PAM58754_c0_g1_i1	0.112528	-0.294067	-0.500395	0.681934
CBV_PAM13339_c0_g1_i1	0.371284	-0.315122	-0.561307	0.505145
CBV_PAM24851_c0_g1_i1	0.35876	-0.509694	-0.374862	0.525796
CBV_PAM13857_c0_g1_i1	0.236363	-0.525675	-0.319	0.608312
CBV_PAM38315_c0_g4_i1	0.013345	-0.374406	-0.364702	0.725763
CBV_PAM25619_c0_g1_i1	0.335721	-0.221981	-0.617562	0.503821
CBV_PAM75996_c0_g1_i1	0.253003	-0.230053	-0.593202	0.570252
CBV_PAM64701_c0_g1_i1	-0.0541822	0.0214767	-0.61161	0.644316
CBV_PAM53484_c0_g1_i1	0.18958	-0.477944	-0.345376	0.633739
CBV_PAM64150_c0_g1_i1	0.365365	-0.476357	-0.397983	0.508976
CBV_PAM24839_c0_g1_i1	0.121293	-0.482112	-0.302009	0.662828
CBV_PAM76314_c0_g1_i1	-0.0901499	-0.108572	-0.504799	0.70352
CBV_PAM13651_c0_g1_i1	-0.0923144	-0.0369437	-0.547475	0.676733
CBV_PAM50798_c1_g1_i1	0.0231471	-0.221004	-0.492073	0.68993
CBV_PAM1001_c0_g1_i1	0.531313	-0.153173	-0.630074	0.251935
CBV_PAM37928_c0_g1_i1	0.34718	0.0280462	-0.720415	0.345189
CBV_PAM24311_c0_g1_i1	0.310317	-0.560148	-0.272387	0.522218
CBV_PAM68014_c0_g1_i1	0.0654945	-0.0857163	-0.599852	0.620074
CBV_PAM24433_c0_g1_i1	0.105842	-0.135537	-0.587495	0.61719
CBV_PAM1086_c2_g1_i1	-0.0894322	-0.087226	-0.512942	0.6896
CBV_PAM64249_c0_g1_i1	0.216566	0.144295	-0.734674	0.373813
CBV_PAM67641_c0_g1_i1	0.422855	-0.0618348	-0.675594	0.314573
CBV_PAM65470_c0_g13_i1	0.10827	-0.0690521	-0.618234	0.579016
CBV_PAM12293_c0_g1_i1	0.12713	-0.29343	-0.470947	0.637247
CBV_PAM40113_c0_g1_i1	0.115128	-0.0834654	-0.604665	0.573002
CBV_PAM14595_c0_g1_i1	0.218287	0.0139892	-0.676762	0.444486
CBV_PAM51105_c0_g1_i1	0.225895	-0.365396	-0.434089	0.57359
CBV_PAM1640_c0_g1_i1	0.327999	-0.150465	-0.614274	0.436741
CBV_PAM25413_c0_g1_i1	0.181771	-0.405462	-0.374736	0.598428
CBV_PAM2917_c0_g1_i1	0.0208542	0.0127737	-0.604893	0.571265
CBV_PAM23883_c1_g1_i1	0.269477	-0.242485	-0.540676	0.513684
CBV_PAM14270_c0_g1_i1	0.398374	-0.000172219	-0.668208	0.270007
CBV_PAM10955_c0_g1_i1	-0.0865442	-0.0438334	-0.509205	0.639583
CBV_PAM23984_c0_g1_i1	0.234566	-0.274793	-0.50245	0.542676
CBV_PAM30628_c0_g1_i1	0.102117	-0.131762	-0.552773	0.582418
CBV_PAM59061_c0_g1_i1	0.128637	0.107324	-0.66477	0.428808
CBV_PAM26072_c0_g1_i1	0.145881	-0.274876	-0.45778	0.586775
CBV_PAM3081_c0_g1_i1	0.225098	-0.253181	-0.503143	0.531226
CBV_PAM956_c0_g1_i1	0.185769	-0.361164	-0.396552	0.571947
CBV_PAM25024_c0_g1_i1	-0.0986628	0.158712	-0.582395	0.522346
CBV_PAM10330_c0_g1_i1	0.287333	-0.426077	-0.360786	0.49953
CBV_PAM38236_c0_g1_i1	0.0939591	-0.181028	-0.502591	0.58966
CBV_PAM67829_c0_g1_i1	0.165532	0.115377	-0.666979	0.38607
CBV_PAM24298_c0_g1_i1	-0.00446779	-0.181802	-0.446457	0.632727
CBV_PAM27370_c0_g1_i1	0.137012	-0.0121321	-0.61169	0.48681
CBV_PAM10741_c0_g1_i1	0.234862	-0.432447	-0.329525	0.52711
CBV_PAM2346_c0_g1_i1	0.127029	-0.151675	-0.529172	0.553818
CBV_PAM10819_c0_g1_i1	0.259961	-0.427597	-0.336824	0.50446
CBV_PAM24302_c0_g1_i1	0.229609	-0.106439	-0.583318	0.460147
CBV_PAM827_c0_g1_i1	0.467321	-0.483435	-0.267927	0.284041
CBV_PAM51231_c0_g1_i1	0.345108	0.0643683	-0.644301	0.234825
CBV_PAM53688_c0_g1_i1	0.403645	-0.411385	-0.356948	0.364688
CBV_PAM10273_c1_g1_i1	0.0121411	-0.144205	-0.464228	0.596291
CBV_PAM53026_c0_g1_i1	0.175823	0.0488787	-0.627305	0.402603
CBV_PAM11124_c0_g1_i1	0.393248	-0.0638628	-0.597935	0.26855
CBV_PAM20714_c0_g1_i1	-0.077953	0.0759401	-0.535291	0.537304
CBV_PAM37240_c0_g1_i1	-0.00585187	0.0891156	-0.572509	0.489246
CBV_PAM23696_c0_g1_i1	0.250557	-0.400301	-0.336946	0.48669
CBV_PAM37911_c2_g1_i1	0.295928	-0.215709	-0.50549	0.425271
CBV_PAM11259_c3_g1_i1	-0.0843267	0.266749	-0.57804	0.395618
CBV_PAM24088_c0_g1_i1	0.0152786	-0.189855	-0.415706	0.590283
CBV_PAM71168_c0_g1_i1	0.109722	-0.278515	-0.388175	0.556968
CBV_PAM59355_c0_g1_i1	0.0461697	-0.327549	-0.306752	0.588131
CBV_PAM23671_c0_g1_i1	-0.00645558	-0.19678	-0.385392	0.588627
CBV_PAM57574_c0_g1_i1	0.321052	-0.173568	-0.515139	0.367656
CBV_PAM52743_c0_g1_i1	0.304251	-0.155468	-0.518963	0.37018
CBV_PAM11356_c0_g1_i1	0.028573	-0.132514	-0.444671	0.548612
CBV_PAM51426_c2_g1_i1	0.205578	-0.321427	-0.361658	0.477507
CBV_PAM2763_c0_g1_i1	0.180408	-0.352812	-0.318691	0.491095
CBV_PAM36291_c0_g1_i1	0.1115	-0.0749596	-0.508446	0.471906
CBV_PAM24678_c0_g1_i1	0.238227	-0.099047	-0.529283	0.390103
CBV_PAM75447_c0_g1_i1	0.210364	-0.16279	-0.484879	0.437304
CBV_PAM37655_c0_g1_i1	0.259315	0.0929785	-0.598668	0.246374
CBV_PAM65312_c1_g1_i1	0.10672	-0.073224	-0.50398	0.470484
CBV_PAM905_c0_g1_i1	0.199802	0.0392172	-0.576226	0.337206
CBV_PAM10233_c0_g4_i1	0.147779	-0.0588708	-0.521331	0.432422
CBV_PAM24831_c0_g1_i1	0.0598852	-0.146947	-0.431943	0.519004
CBV_PAM65241_c0_g1_i1	0.184062	-0.314419	-0.345082	0.47544
CBV_PAM45015_c0_g1_i1	0.123917	0.169346	-0.586608	0.293345
CBV_PAM11472_c0_g1_i1	0.144244	-0.354623	-0.279187	0.489565
CBV_PAM41056_c0_g1_i1	0.0453155	-0.112601	-0.438603	0.505888
CBV_PAM23946_c0_g1_i1	0.00499373	0.202659	-0.549986	0.342333
CBV_PAM515_c1_g1_i1	0.110234	0.103207	-0.561413	0.347973
CBV_PAM24306_c0_g1_i1	0.168061	-0.211194	-0.411113	0.454247
CBV_PAM23779_c1_g1_i1	0.10982	-0.203573	-0.390997	0.484751
CBV_PAM26224_c0_g1_i1	0.285549	-0.244518	-0.399067	0.358037
CBV_PAM39688_c0_g1_i1	0.278388	-0.340772	-0.309507	0.371892
CBV_PAM37183_c2_g1_i1	0.328571	-0.215908	-0.41356	0.300896
CBV_PAM2508_c0_g1_i1	0.0860512	-0.173606	-0.383387	0.470941
CBV_PAM53480_c0_g1_i1	0.169436	0.0796129	-0.536172	0.287123
CBV_PAM696_c0_g2_i1	0.231837	-0.208225	-0.403305	0.379693
CBV_PAM24907_c0_g1_i1	0.297669	-0.35483	-0.275467	0.332628
CBV_PAM28185_c0_g1_i1	0.333513	-0.380672	-0.244292	0.29145
CBV_PAM13893_c0_g1_i1	0.132903	-0.249163	-0.338095	0.454355
CBV_PAM10402_c2_g1_i1	0.163285	-0.0857607	-0.456887	0.379363
CBV_PAM37394_c0_g1_i1	0.178137	-0.21956	-0.355882	0.397304
CBV_PAM37349_c1_g1_i1	0.1053	-0.0600935	-0.439266	0.394059
CBV_PAM67751_c0_g1_i1	0.134989	-0.0306865	-0.459766	0.355463
CBV_PAM1344_c0_g1_i1	0.189347	-0.21847	-0.352115	0.381238
CBV_PAM23709_c0_g1_i1	0.157975	-0.0651494	-0.438095	0.345269
CBV_PAM24145_c0_g1_i1	0.298724	-0.215441	-0.349877	0.266594
CBV_PAM50933_c4_g1_i1	0.050304	0.0568048	-0.450388	0.34328

## Sheet: Subcluster6
Additional file 6. Expression subcluster matrix. Values of Trinity gene expression (TPM-TMM) for 15 subclusters identified by gene expression cluster analysis during fruit developmental stages (150, 240, 300 and 390 days after fruit set; DAFS) in Persea americana cv. Hass.
Trinity genes	150-DAFS	240-DAFS	300-DAFS	390-DAFS
CBV_PAM37882_c0_g4_i1	0.0147806	-1.49271	0.0647969	1.41314
CBV_PAM30522_c1_g1_i1	0.377934	-1.61853	0.95143	0.289171
CBV_PAM50911_c0_g3_i1	-0.410315	-0.0742869	-1.05559	1.5402
CBV_PAM43960_c0_g1_i1	-0.626698	-1.00801	0.328632	1.30608
CBV_PAM25309_c2_g1_i1	-0.710054	-1.03968	0.790927	0.958802
CBV_PAM11378_c1_g2_i1	-0.0761326	-1.12475	-0.133261	1.33414
CBV_PAM68633_c0_g1_i1	-0.246056	-1.32437	0.744009	0.826416
CBV_PAM1626_c0_g1_i1	-0.773278	-0.889441	0.497133	1.16559
CBV_PAM67107_c1_g1_i1	-0.723613	-0.887548	0.413596	1.19756
CBV_PAM54351_c0_g1_i1	-0.424313	-1.17878	0.734609	0.868488
CBV_PAM2515_c1_g1_i1	-0.829886	-0.357323	-0.191349	1.37856
CBV_PAM65318_c0_g13_i1	-0.724414	0.22818	-0.724414	1.22065
CBV_PAM44530_c0_g1_i1	-0.822245	-0.7794	0.712165	0.889479
CBV_PAM72536_c0_g1_i1	-0.578225	-0.992201	0.70869	0.861735
CBV_PAM75015_c0_g1_i1	-0.815131	-0.627364	0.249953	1.19254
CBV_PAM55894_c1_g1_i1	-0.356498	-1.0959	0.510636	0.941764
CBV_PAM862_c0_g1_i1	-0.265577	-1.05254	0.208246	1.10987
CBV_PAM51845_c0_g2_i1	-0.0674456	-1.12307	1.08081	0.109706
CBV_PAM6244_c0_g1_i1	-0.667377	-0.684477	0.128672	1.22318
CBV_PAM12979_c0_g1_i1	-0.908971	-0.536157	0.385332	1.0598
CBV_PAM54793_c0_g1_i1	-0.562613	-0.401325	-0.360584	1.32452
CBV_PAM56934_c0_g1_i1	-0.753909	-0.298817	-0.230458	1.28318
CBV_PAM38579_c0_g1_i1	-0.264735	-1.13607	0.695624	0.70518
CBV_PAM11737_c0_g1_i1	-0.488551	-0.977192	0.636134	0.829609
CBV_PAM4506_c0_g1_i1	-0.469888	-0.469888	-0.366442	1.30622
CBV_PAM58264_c0_g1_i1	-0.726139	-0.23778	-0.300876	1.26479
CBV_PAM23191_c0_g1_i1	-0.964006	-0.0964295	-0.0846019	1.14504
CBV_PAM66172_c0_g1_i1	-0.967744	-0.41054	0.375978	1.00231
CBV_PAM65470_c0_g12_i1	-0.410582	-0.962366	0.36447	1.00848
CBV_PAM66210_c0_g1_i1	-0.901216	-0.0350907	-0.235717	1.17202
CBV_PAM7386_c0_g1_i1	-0.510497	-0.886523	0.370238	1.02678
CBV_PAM54974_c1_g1_i1	-0.368298	-0.250389	-0.651611	1.2703
CBV_PAM11734_c0_g1_i1	-0.7656	0.179888	-0.556655	1.14237
CBV_PAM55158_c0_g1_i1	-0.920424	-0.33177	0.149301	1.10289
CBV_PAM55019_c0_g1_i1	-0.607359	-0.518913	-0.109705	1.23598
CBV_PAM11214_c0_g1_i1	-0.846296	-0.590061	0.523021	0.913336
CBV_PAM67581_c0_g1_i1	-0.540301	-0.368126	-0.35969	1.26812
CBV_PAM68152_c0_g1_i1	-0.896172	-0.466025	0.352431	1.00977
CBV_PAM60875_c0_g1_i1	-0.686728	-0.621612	0.18473	1.12361
CBV_PAM65357_c0_g1_i1	-0.818382	-0.470569	0.179855	1.1091
CBV_PAM65617_c0_g1_i1	-0.762928	0.254083	-0.568039	1.07688
CBV_PAM69954_c0_g1_i1	-0.75397	-0.628584	0.374582	1.00797
CBV_PAM38702_c0_g1_i1	-0.77526	-0.52907	0.212615	1.09172
CBV_PAM53021_c0_g1_i1	-0.851199	-0.168822	-0.137314	1.15733
CBV_PAM64696_c2_g1_i1	-0.852608	-0.196815	-0.0954789	1.1449
CBV_PAM40281_c0_g1_i1	-0.534437	0.136301	-0.716005	1.11414
CBV_PAM17526_c0_g1_i1	-0.715512	-0.272271	-0.205487	1.19327
CBV_PAM52914_c1_g1_i1	-0.657793	-0.492886	-0.020114	1.17079
CBV_PAM65702_c0_g10_i1	-0.789688	-0.337452	-0.015423	1.14256
CBV_PAM388_c1_g1_i1	-0.635592	-0.291335	-0.283687	1.21061
CBV_PAM37807_c0_g1_i1	-0.309595	-0.477298	-0.43927	1.22616
CBV_PAM17596_c0_g2_i1	-0.193319	-1.0681	0.48069	0.780726
CBV_PAM34950_c0_g1_i1	-0.239767	-0.850814	-0.0194347	1.11002
CBV_PAM28431_c1_g1_i1	-0.846666	-0.419374	0.239829	1.02621
CBV_PAM28901_c0_g1_i1	-0.578236	-0.721274	0.260923	1.03859
CBV_PAM66392_c0_g1_i1	-0.521988	-0.168116	-0.509747	1.19985
CBV_PAM34524_c0_g1_i1	-0.254812	-1.00993	0.392069	0.872678
CBV_PAM40845_c0_g1_i1	-0.67978	-0.695513	0.463171	0.912122
CBV_PAM61754_c0_g1_i1	-0.780599	-0.430265	0.123412	1.08745
CBV_PAM30092_c0_g1_i1	-0.407452	-0.0876814	-0.672535	1.16767
CBV_PAM65422_c0_g1_i1	-0.30246	-0.811508	0.00731287	1.10665
CBV_PAM26665_c0_g1_i1	-0.431154	-0.687029	-0.0216431	1.13983
CBV_PAM42043_c0_g1_i1	-0.503982	-0.783157	0.284688	1.00245
CBV_PAM13543_c0_g1_i1	-0.568336	-0.538332	-0.0473564	1.15402
CBV_PAM76229_c0_g1_i1	-0.665766	-0.0611829	-0.421633	1.14858
CBV_PAM12356_c0_g1_i1	-0.536401	-0.524205	-0.108266	1.16887
CBV_PAM51218_c1_g1_i1	-0.121507	-0.867565	-0.0887475	1.07782
CBV_PAM5443_c0_g1_i1	-0.287072	-0.656892	-0.226967	1.17093
CBV_PAM29979_c0_g1_i1	-0.421875	-0.150202	-0.600498	1.17257
CBV_PAM38360_c1_g1_i1	-0.696261	-0.605415	0.313946	0.98773
CBV_PAM66000_c0_g1_i1	-0.566878	-0.33746	-0.281402	1.18574
CBV_PAM10930_c0_g10_i1	-0.651638	-0.430867	-0.0569078	1.13941
CBV_PAM71861_c0_g1_i1	-0.511821	-0.664424	0.0834761	1.09277
CBV_PAM26471_c0_g1_i1	-0.771316	-0.0740069	-0.261178	1.1065
CBV_PAM26064_c1_g1_i1	-0.779102	-0.240953	-0.0813314	1.10139
CBV_PAM45423_c0_g2_i1	-0.525087	-0.343573	-0.311415	1.18007
CBV_PAM42110_c1_g1_i1	-0.421363	-0.119426	-0.607035	1.14782
CBV_PAM47883_c0_g1_i1	-0.549583	-0.607317	0.0621286	1.09477
CBV_PAM70996_c0_g1_i1	-0.502019	-0.794463	0.387908	0.908574
CBV_PAM66831_c0_g1_i1	-0.52066	-0.389915	-0.257598	1.16817
CBV_PAM33679_c0_g1_i1	-0.739803	-0.371309	0.0306459	1.08047
CBV_PAM55197_c0_g1_i1	-0.374022	-0.442069	-0.361252	1.17734
CBV_PAM36138_c0_g1_i1	-0.441148	-0.538737	-0.17066	1.15055
CBV_PAM44854_c0_g1_i1	-0.372071	-0.868918	0.329121	0.911868
CBV_PAM27415_c0_g1_i1	-0.699253	-0.39623	0.00751436	1.08797
CBV_PAM38753_c1_g1_i1	-0.443904	-0.605906	-0.0697663	1.11958
CBV_PAM51914_c0_g1_i1	-0.666743	-0.631489	0.389788	0.908445
CBV_PAM56628_c0_g1_i1	-0.665114	-0.103977	-0.346779	1.11587
CBV_PAM881_c0_g1_i1	-0.684564	-0.125871	-0.303155	1.11359
CBV_PAM50801_c0_g1_i1	-0.250755	-0.560776	-0.338162	1.14969
CBV_PAM26618_c0_g1_i1	-0.670687	-0.482941	0.094803	1.05883
CBV_PAM56914_c0_g1_i1	-0.637045	-0.28589	-0.208583	1.13152
CBV_PAM10238_c0_g5_i1	-0.87096	-0.196423	0.0641376	1.00325
CBV_PAM38920_c0_g1_i1	-0.0882448	-0.736395	-0.263838	1.08848
CBV_PAM23681_c0_g11_i1	0.562583	-1.14108	0.198582	0.379912
CBV_PAM44557_c1_g1_i1	-0.601007	-0.606149	0.198801	1.00836
CBV_PAM25456_c0_g1_i1	-0.610161	-0.136618	-0.371167	1.11795
CBV_PAM51448_c0_g5_i1	-0.824031	-0.083715	-0.127871	1.03562
CBV_PAM27240_c0_g1_i1	-0.707613	-0.509011	0.241325	0.975299
CBV_PAM13162_c0_g1_i1	0.148425	-0.956763	-0.0976808	0.906019
CBV_PAM29405_c0_g1_i1	-0.776823	-0.356484	0.12956	1.00375
CBV_PAM68789_c0_g1_i1	-0.630845	-0.355762	-0.113594	1.1002
CBV_PAM45658_c0_g1_i1	-0.44328	-0.638762	0.0130794	1.06896
CBV_PAM17321_c0_g1_i1	-0.350042	-0.337377	-0.453354	1.14077
CBV_PAM52244_c0_g1_i1	-0.595037	-0.312245	-0.209273	1.11656
CBV_PAM15035_c0_g1_i1	-0.0610699	-1.00834	0.269461	0.79995
CBV_PAM30217_c0_g1_i1	-0.821214	-0.289311	0.13531	0.975214
CBV_PAM8391_c0_g1_i1	-0.70885	-0.32516	-0.0221446	1.05615
CBV_PAM37543_c1_g1_i1	-0.675295	0.275656	-0.539343	0.938982
CBV_PAM51342_c1_g1_i1	-0.437562	-0.41948	-0.265082	1.12212
CBV_PAM42614_c0_g1_i1	-0.530354	-0.600713	0.110649	1.02042
CBV_PAM13864_c0_g1_i1	-0.457983	-0.415931	-0.240717	1.11463
CBV_PAM31128_c0_g1_i1	-0.509989	-0.285197	-0.318364	1.11355
CBV_PAM67878_c0_g1_i1	-0.4131	-0.319371	-0.389364	1.12184
CBV_PAM37284_c0_g2_i1	-0.137069	-0.981504	0.747908	0.370665
CBV_PAM23874_c3_g1_i1	-0.510268	-0.33354	-0.265082	1.10889
CBV_PAM42360_c0_g1_i1	-0.852212	-0.142744	0.0365236	0.958432
CBV_PAM54142_c0_g1_i1	-0.405807	-0.177216	-0.513796	1.09682
CBV_PAM1949_c1_g1_i1	0.0504346	-0.837796	-0.174881	0.962243
CBV_PAM30992_c0_g1_i1	-0.686073	-0.282383	-0.0806014	1.04906
CBV_PAM14006_c0_g1_i1	-0.564264	-0.154829	-0.36492	1.08401
CBV_PAM234_c2_g1_i1	-0.653779	-0.487873	0.166572	0.97508
CBV_PAM10999_c1_g1_i1	-0.770768	-0.482102	0.50109	0.75178
CBV_PAM10470_c0_g1_i1	0.24749	-1.01565	0.0297519	0.738411
CBV_PAM13062_c0_g1_i1	-0.613858	-0.529478	0.173818	0.969518
CBV_PAM76204_c0_g1_i1	-0.0665294	-0.911834	0.0938229	0.884541
CBV_PAM13588_c0_g1_i1	-0.340504	-0.331009	-0.429553	1.10107
CBV_PAM73211_c0_g1_i1	-0.684596	-0.025406	-0.315203	1.0252
CBV_PAM24928_c0_g1_i1	-0.749879	-0.481433	0.438029	0.793284
CBV_PAM40649_c0_g1_i1	-0.253091	-0.833006	0.178127	0.90797
CBV_PAM27478_c0_g1_i1	-0.901714	-0.183044	0.24352	0.841238
CBV_PAM58937_c1_g1_i1	-0.313871	-0.595401	-0.156256	1.06553
CBV_PAM51361_c0_g1_i1	-0.385213	-0.495379	-0.202033	1.08263
CBV_PAM11044_c0_g1_i1	-0.797712	-0.226059	0.0705875	0.953183
CBV_PAM2943_c1_g1_i1	-0.712438	-0.399038	0.160483	0.950993
CBV_PAM66763_c0_g1_i1	-0.345632	-0.597775	-0.108613	1.05202
CBV_PAM42406_c0_g1_i1	-0.716875	0.0634607	-0.330142	0.983556
CBV_PAM41008_c0_g1_i1	-0.769685	-0.196163	-0.01535	0.981198
CBV_PAM4494_c0_g1_i1	-0.466512	-0.16539	-0.441961	1.07386
CBV_PAM69499_c0_g1_i1	-0.534516	-0.122629	-0.405129	1.06227
CBV_PAM37238_c0_g4_i1	-0.38562	-0.315062	-0.390301	1.09098
CBV_PAM72052_c0_g1_i1	-0.549926	-0.0285338	-0.458752	1.03721
CBV_PAM4674_c0_g1_i1	-0.635794	-0.523663	0.23832	0.921138
CBV_PAM37366_c0_g1_i1	-0.421662	-0.660365	0.103698	0.978329
CBV_PAM39385_c0_g4_i1	-0.625094	-0.625094	0.538212	0.711976
CBV_PAM24804_c0_g1_i1	-0.33654	-0.639562	-0.0473466	1.02345
CBV_PAM32066_c0_g1_i1	-0.632209	-0.193666	-0.216157	1.04203
CBV_PAM37213_c1_g1_i1	-0.342548	-0.544737	-0.172232	1.05952
CBV_PAM44995_c0_g1_i1	-0.446855	-0.363047	-0.267667	1.07757
CBV_PAM15227_c0_g1_i1	-0.716693	-0.436299	0.269475	0.883517
CBV_PAM11514_c0_g1_i1	-0.617496	-0.385921	-0.00946844	1.01289
CBV_PAM11644_c0_g1_i1	-0.284472	-0.515757	-0.266117	1.06635
CBV_PAM50920_c1_g1_i1	-0.539631	-0.576286	0.165033	0.950884
CBV_PAM73796_c0_g1_i1	-0.413686	-0.250926	-0.407891	1.0725
CBV_PAM60392_c0_g1_i1	-0.806457	-0.178721	0.0635435	0.921634
CBV_PAM52101_c0_g1_i1	-0.336526	-0.143048	-0.561461	1.04103
CBV_PAM65510_c0_g1_i1	-0.324897	-0.349135	-0.396621	1.07065
CBV_PAM14376_c0_g1_i1	-0.607027	-0.499424	0.166022	0.940428
CBV_PAM73035_c0_g1_i1	-0.596217	-0.392665	-0.0190699	1.00795
CBV_PAM10351_c1_g1_i1	-0.590204	-0.293943	-0.148986	1.03313
CBV_PAM75115_c0_g1_i1	-0.665223	0.1613	-0.428894	0.932816
CBV_PAM55970_c0_g1_i1	-0.412367	-0.195015	-0.445515	1.0529
CBV_PAM10798_c0_g1_i1	-0.437174	-0.4539	-0.154157	1.04523
CBV_PAM58468_c0_g1_i1	-0.350339	-0.428614	-0.281225	1.06018
CBV_PAM42771_c0_g1_i1	-0.73718	-0.306429	0.11866	0.924949
CBV_PAM3250_c0_g1_i1	-0.679803	-0.204489	-0.110726	0.995018
CBV_PAM64793_c0_g1_i1	-0.663782	0.102081	-0.384906	0.946607
CBV_PAM24809_c0_g1_i1	-0.596303	-0.328546	-0.0864674	1.01132
CBV_PAM53083_c0_g1_i1	-0.236033	-0.533636	-0.269484	1.03915
CBV_PAM11406_c1_g1_i1	-0.0685529	-0.952524	0.680157	0.34092
CBV_PAM69409_c0_g1_i1	-0.542385	-0.363426	-0.119071	1.02488
CBV_PAM37975_c0_g1_i1	-0.199548	-0.340764	-0.499524	1.03984
CBV_PAM65620_c1_g1_i1	-0.260927	-0.345132	-0.441552	1.04761
CBV_PAM12761_c1_g1_i1	-0.188412	-0.806505	0.115656	0.879261
CBV_PAM23873_c0_g1_i1	-0.720856	0.0649095	-0.277538	0.933485
CBV_PAM30873_c0_g1_i1	-0.488217	-0.354318	-0.190062	1.0326
CBV_PAM10680_c1_g1_i1	-0.60574	-0.142037	-0.25777	1.00555
CBV_PAM30127_c0_g2_i1	-0.328069	-0.813495	0.71472	0.426844
CBV_PAM69124_c0_g1_i1	-0.514636	-0.632072	0.317265	0.829442
CBV_PAM64259_c0_g1_i1	-0.589057	-0.145677	-0.270433	1.00517
CBV_PAM3810_c0_g1_i1	-0.232821	-0.607819	-0.160322	1.00096
CBV_PAM70529_c0_g1_i1	-0.109875	-0.611555	-0.271717	0.993146
CBV_PAM67867_c0_g1_i1	-0.769473	-0.218437	0.0965702	0.89134
CBV_PAM41914_c0_g1_i1	-0.632478	0.098922	-0.398561	0.932117
CBV_PAM25573_c1_g1_i1	-0.697809	-0.301329	0.0754204	0.923718
CBV_PAM70553_c0_g1_i1	-0.566373	-0.550627	0.252196	0.864804
CBV_PAM74425_c0_g1_i1	-0.72885	-0.286804	0.118429	0.897225
CBV_PAM38454_c2_g1_i1	-0.737295	-0.00494243	-0.182076	0.924314
CBV_PAM51127_c0_g1_i1	-0.340996	-0.288551	-0.40063	1.03018
CBV_PAM8477_c0_g1_i1	-0.253513	-0.58553	-0.155064	0.994107
CBV_PAM26183_c0_g1_i1	-0.436084	-0.282197	-0.308473	1.02675
CBV_PAM10204_c1_g1_i1	-0.690365	-0.00183606	-0.244461	0.936662
CBV_PAM10327_c1_g1_i1	-0.683409	-0.364807	0.162647	0.885569
CBV_PAM57066_c0_g1_i1	-0.459454	0.189189	-0.614133	0.884398
CBV_PAM317_c3_g1_i1	-0.609833	-0.404501	0.08639	0.927945
CBV_PAM70011_c0_g1_i1	-0.11515	-0.64874	-0.194882	0.958771
CBV_PAM13556_c0_g1_i1	-0.714222	-0.244309	0.0553493	0.903182
CBV_PAM33007_c1_g1_i1	-0.603012	-0.210555	-0.162563	0.97613
CBV_PAM69444_c0_g1_i1	-0.540613	-0.301165	-0.149156	0.990935
CBV_PAM7135_c0_g1_i1	-0.432089	-0.476884	-0.0734038	0.982377
CBV_PAM664_c1_g1_i1	-0.349311	-0.522807	-0.115718	0.987836
CBV_PAM66393_c0_g1_i1	-0.57551	0.0824879	-0.432743	0.925765
CBV_PAM37717_c0_g1_i1	-0.629637	-0.183074	-0.148749	0.96146
CBV_PAM11795_c0_g1_i1	-0.69253	-0.441211	0.412668	0.721072
CBV_PAM25227_c1_g1_i1	-0.623667	-0.427167	0.178882	0.871952
CBV_PAM64348_c1_g1_i1	-0.315214	-0.00378455	-0.619286	0.938285
CBV_PAM34700_c0_g1_i1	-0.823513	-0.243323	0.365189	0.701648
CBV_PAM21580_c0_g1_i1	-0.280255	-0.64284	-0.00846255	0.931558
CBV_PAM64741_c1_g1_i1	-0.679391	0.0906129	-0.303678	0.892456
CBV_PAM51103_c0_g2_i1	-0.322677	-0.467701	-0.205997	0.996375
CBV_PAM52550_c0_g4_i1	-0.577637	0.479154	-0.577637	0.676121
CBV_PAM25844_c0_g1_i1	-0.545664	-0.348084	-0.0691769	0.962924
CBV_PAM38403_c0_g2_i1	-0.51162	0.0652217	-0.478091	0.924489
CBV_PAM24697_c1_g1_i1	-0.651837	-0.294252	0.0325397	0.91355
CBV_PAM20167_c0_g1_i1	-0.754147	-0.136068	0.0210278	0.869187
CBV_PAM51820_c0_g1_i1	-0.499426	-0.426085	-0.0289477	0.954458
CBV_PAM51556_c0_g1_i1	-0.44134	-0.16404	-0.380949	0.986329
CBV_PAM39835_c0_g1_i1	-0.487846	-0.111094	-0.373945	0.972885
CBV_PAM38742_c0_g3_i1	-0.571159	0.445733	-0.571159	0.696586
CBV_PAM43691_c0_g1_i1	-0.654302	0.0421236	-0.291729	0.903907
CBV_PAM40253_c0_g1_i1	-0.690764	-0.211787	0.00346663	0.899085
CBV_PAM10370_c0_g1_i1	-0.527687	0.202728	-0.527687	0.852646
CBV_PAM17356_c0_g1_i1	-0.627289	-0.355772	0.0904586	0.892603
CBV_PAM10405_c0_g1_i1	-0.122582	-0.48748	-0.358609	0.968671
CBV_PAM58323_c0_g1_i1	0.0685409	-0.936494	0.260669	0.607283
CBV_PAM26908_c1_g1_i1	-0.553265	-0.246379	-0.160943	0.960587
CBV_PAM45042_c0_g1_i1	-0.40039	-0.0546203	-0.49622	0.95123
CBV_PAM1252_c0_g1_i1	-0.313428	-0.0980512	-0.542573	0.954052
CBV_PAM10930_c0_g7_i1	-0.217616	-0.303902	-0.458255	0.979772
CBV_PAM27882_c0_g1_i1	-0.511005	-0.299612	-0.154766	0.965384
CBV_PAM17990_c0_g1_i1	0.0355316	-0.732148	-0.164933	0.86155
CBV_PAM19151_c0_g1_i1	-0.56561	-0.478839	0.196582	0.847867
CBV_PAM27224_c0_g1_i1	-0.643517	-0.318652	0.0828555	0.879314
CBV_PAM2589_c0_g1_i1	-0.627165	0.0174109	-0.293092	0.902846
CBV_PAM1472_c0_g1_i1	-0.0943623	-0.518938	-0.336343	0.949643
CBV_PAM71291_c1_g1_i1	-0.351143	-0.261627	-0.369386	0.982156
CBV_PAM38149_c1_g1_i1	0.0233155	-0.920435	0.59408	0.30304
CBV_PAM39045_c0_g5_i1	0.293189	-0.929593	0.580063	0.0563411
CBV_PAM73199_c0_g1_i1	-0.490392	0.0646591	-0.476965	0.902698
CBV_PAM69219_c0_g1_i1	-0.443776	-0.457386	-0.03565	0.936812
CBV_PAM65367_c1_g1_i1	-0.398385	-0.418913	-0.141013	0.95831
CBV_PAM30084_c0_g1_i1	-0.596357	-0.206504	-0.123779	0.926641
CBV_PAM55318_c0_g1_i1	-0.567814	-0.166271	-0.203798	0.937882
CBV_PAM51651_c0_g1_i1	-0.461772	-0.28469	-0.216949	0.963411
CBV_PAM66868_c0_g1_i1	-0.515522	0.0560157	-0.439162	0.898669
CBV_PAM37535_c1_g1_i1	-0.348061	-0.505965	-0.0859949	0.940021
CBV_PAM22199_c0_g1_i1	-0.305833	-0.477887	-0.170815	0.954535
CBV_PAM24282_c0_g1_i1	-0.652187	-0.268508	0.0478128	0.872881
CBV_PAM71416_c0_g1_i1	-0.356604	-0.671539	0.237035	0.791107
CBV_PAM69750_c0_g1_i1	-0.316397	-0.288713	-0.364642	0.969752
CBV_PAM26165_c1_g4_i1	-0.292123	-0.755463	0.36318	0.684406
CBV_PAM52475_c0_g1_i1	-0.234621	-0.394316	-0.336636	0.965573
CBV_PAM12943_c1_g1_i1	-0.466265	-0.432177	-0.0239727	0.922414
CBV_PAM37646_c0_g5_i1	-0.523024	-0.523024	0.239072	0.806977
CBV_PAM70112_c0_g1_i1	-0.427396	-0.24613	-0.287263	0.960788
CBV_PAM70879_c0_g1_i1	-0.304034	-0.607101	0.0255301	0.885605
CBV_PAM44490_c0_g1_i1	-0.458644	-0.52541	0.122062	0.861993
CBV_PAM5182_c0_g1_i1	-0.626511	-0.36267	0.154762	0.834419
CBV_PAM25052_c0_g1_i1	-0.6534	-0.116533	-0.117586	0.887519
CBV_PAM75_c1_g1_i1	-0.492885	-0.583619	0.34115	0.735353
CBV_PAM75180_c0_g1_i1	-0.547817	-0.183864	-0.198617	0.930299
CBV_PAM60596_c0_g1_i1	-0.708507	-0.177185	0.0472974	0.838395
CBV_PAM57042_c0_g1_i1	-0.651534	-0.448918	0.491793	0.60866
CBV_PAM52742_c1_g1_i1	-0.427318	-0.43178	-0.0674153	0.926513
CBV_PAM28367_c0_g1_i1	-0.76626	-0.0551761	0.0214165	0.80002
CBV_PAM12279_c0_g1_i1	-0.712569	-0.0697586	-0.0600629	0.84239
CBV_PAM28062_c0_g1_i1	-0.097392	-0.744681	0.0309636	0.811109
CBV_PAM21764_c0_g1_i1	-0.703966	-0.126386	-0.0125137	0.842865
CBV_PAM27082_c0_g1_i1	-0.703133	-0.28739	0.221911	0.768611
CBV_PAM70595_c0_g1_i1	-0.37779	-0.613445	0.177738	0.813498
CBV_PAM39567_c0_g1_i1	-0.526546	-0.340449	-0.0338623	0.900857
CBV_PAM71724_c0_g1_i1	-0.536045	-0.110555	-0.266954	0.913554
CBV_PAM6770_c0_g4_i1	-0.36852	-0.466794	-0.0829958	0.91831
CBV_PAM65472_c1_g1_i1	-0.520698	-0.491257	0.207899	0.804056
CBV_PAM24649_c0_g1_i1	-0.366075	-0.0336345	-0.500768	0.900477
CBV_PAM65710_c1_g1_i1	-0.425181	-0.282611	-0.228721	0.936513
CBV_PAM842_c1_g1_i1	-0.588214	-0.461357	0.324981	0.72459
CBV_PAM55452_c0_g2_i1	-0.446143	0.0044001	-0.446143	0.887885
CBV_PAM28616_c0_g1_i1	0.171139	-0.883259	0.603726	0.108394
CBV_PAM10328_c0_g1_i1	-0.130108	-0.641076	-0.0932824	0.864467
CBV_PAM64801_c1_g1_i1	-0.544512	-0.147049	-0.213814	0.905375
CBV_PAM53522_c0_g1_i1	-0.596444	-0.325777	0.0761822	0.846038
CBV_PAM64181_c0_g1_i1	-0.621414	-0.0408631	-0.205112	0.867389
CBV_PAM16072_c0_g1_i1	-0.259743	-0.283843	-0.393486	0.937072
CBV_PAM28396_c0_g1_i1	-0.635783	-0.269736	0.0698882	0.83563
CBV_PAM68805_c0_g1_i1	-0.376096	-0.343608	-0.214748	0.934452
CBV_PAM37179_c2_g1_i1	-0.598847	-0.442289	0.319482	0.721654
CBV_PAM316_c0_g5_i1	-0.443861	0.0134519	-0.449383	0.879792
CBV_PAM52506_c0_g1_i1	-0.443968	-0.432818	-0.0100944	0.88688
CBV_PAM64447_c0_g1_i1	-0.665533	-0.280684	0.156132	0.790085
CBV_PAM61813_c0_g1_i1	-0.466642	-0.338066	-0.102089	0.906797
CBV_PAM2456_c0_g1_i1	-0.638099	-0.15226	-0.0625061	0.852865
CBV_PAM25797_c0_g1_i1	-0.215096	-0.630219	-0.000388596	0.845703
CBV_PAM4046_c1_g1_i1	-0.352194	-0.326546	-0.250106	0.928846
CBV_PAM24_c1_g1_i1	-0.482793	-0.460309	0.107099	0.836003
CBV_PAM69338_c0_g1_i1	-0.454335	0.231543	-0.548081	0.770872
CBV_PAM66257_c0_g1_i1	-0.601718	-0.43486	0.34388	0.692697
CBV_PAM68054_c0_g1_i1	-0.405292	-0.032065	-0.446969	0.884325
CBV_PAM22103_c0_g1_i1	-0.583247	0.172139	-0.382854	0.793962
CBV_PAM73339_c0_g1_i1	-0.591062	-0.109399	-0.168268	0.868729
CBV_PAM72854_c0_g1_i1	-0.520915	-0.270604	-0.0970928	0.888612
CBV_PAM56882_c0_g1_i1	-0.354839	-0.360372	-0.202723	0.917934
CBV_PAM37679_c0_g1_i1	-0.734728	-0.124383	0.105113	0.753998
CBV_PAM65985_c0_g1_i1	-0.279247	-0.551901	-0.0325703	0.863718
CBV_PAM50828_c0_g1_i1	-0.35996	-0.11314	-0.425	0.898101
CBV_PAM34654_c0_g1_i1	-0.66228	0.0295086	-0.177816	0.810587
CBV_PAM60248_c0_g1_i1	-0.672141	-0.151611	0.0161468	0.807605
CBV_PAM2810_c0_g1_i1	-0.580468	-0.240016	-0.0334219	0.853906
CBV_PAM69413_c0_g1_i1	-0.120445	-0.390221	-0.386169	0.896835
CBV_PAM43063_c0_g1_i1	-0.4034	-0.290386	-0.214665	0.908451
CBV_PAM10233_c0_g7_i1	-0.487728	-0.487728	0.204914	0.770542
CBV_PAM64813_c0_g2_i1	-0.583644	-0.153456	-0.117904	0.855003
CBV_PAM12948_c0_g1_i1	-0.285846	-0.274997	-0.349649	0.910491
CBV_PAM25966_c0_g8_i1	-0.357024	-0.474055	-0.0362244	0.867303
CBV_PAM2134_c0_g1_i1	-0.71801	-0.209105	0.226468	0.700646
CBV_PAM14836_c0_g1_i1	-0.287616	-0.499993	-0.0842419	0.871851
CBV_PAM14520_c0_g1_i1	-0.693265	0.0214194	-0.10607	0.777915
CBV_PAM1847_c0_g2_i1	-0.302151	-0.302151	-0.302151	0.906453
CBV_PAM64166_c0_g1_i1	-0.59945	-0.36861	0.230171	0.737889
CBV_PAM69442_c0_g1_i1	-0.612355	-0.0366389	-0.17799	0.826983
CBV_PAM937_c0_g1_i1	-0.0866704	-0.552728	-0.216069	0.855468
CBV_PAM24599_c0_g1_i1	-0.0992282	-0.498931	-0.271202	0.869361
CBV_PAM11742_c0_g1_i1	-0.423915	-0.293263	-0.17129	0.888468
CBV_PAM37879_c0_g1_i1	-0.587716	-0.27847	0.0592239	0.806962
CBV_PAM39400_c1_g1_i1	-0.658383	-0.210793	0.103293	0.765883
CBV_PAM23595_c0_g1_i1	-0.430307	-0.278542	-0.175219	0.884068
CBV_PAM262_c1_g1_i1	-0.468166	-0.175322	-0.234034	0.877522
CBV_PAM64258_c3_g1_i1	-0.670091	-0.0848174	-0.0305855	0.785494
CBV_PAM6861_c0_g1_i1	-0.469162	-0.273002	-0.129447	0.871611
CBV_PAM64941_c1_g1_i1	-0.356558	-0.529738	0.0770687	0.809226
CBV_PAM54532_c0_g1_i1	-0.405501	-0.485164	0.0765244	0.814141
CBV_PAM55164_c0_g1_i1	-0.217372	-0.0965458	-0.536702	0.85062
CBV_PAM64145_c1_g1_i1	-0.0282554	-0.497905	-0.320303	0.846464
CBV_PAM15100_c0_g1_i1	-0.63897	-0.227531	0.0927449	0.773756
CBV_PAM37669_c0_g3_i1	0.250085	-0.822067	0.569193	0.00278863
CBV_PAM27789_c0_g1_i1	-0.318585	-0.585647	0.13259	0.771642
CBV_PAM69992_c0_g1_i1	-0.522626	-0.43921	0.227823	0.734013
CBV_PAM11316_c0_g1_i1	-0.47866	-0.267212	-0.114907	0.860779
CBV_PAM20210_c0_g1_i1	-0.493723	-0.211071	-0.156075	0.860869
CBV_PAM39112_c0_g1_i1	-0.248281	-0.37442	-0.262144	0.884845
CBV_PAM23860_c3_g1_i1	-0.579189	-0.297183	0.0892719	0.7871
CBV_PAM39211_c0_g1_i1	-0.591624	-0.179214	-0.0436462	0.814484
CBV_PAM30004_c0_g1_i1	-0.543204	0.186451	-0.392801	0.749554
CBV_PAM13939_c0_g1_i1	-0.64365	-0.13509	-0.00181618	0.780555
CBV_PAM58723_c0_g1_i1	-0.47452	-0.26868	-0.111133	0.854332
CBV_PAM54314_c0_g1_i1	-0.2713	-0.456568	-0.132159	0.860027
CBV_PAM37621_c0_g1_i1	-0.42933	-0.524312	0.230344	0.723298
CBV_PAM52659_c0_g1_i1	-0.590514	-0.0401499	-0.177141	0.807804
CBV_PAM35122_c0_g1_i1	-0.608761	-0.239644	0.0736321	0.774772
CBV_PAM65132_c0_g1_i1	-0.642049	-0.0569227	-0.0810528	0.780024
CBV_PAM64926_c0_g1_i1	-0.18544	-0.339848	-0.346511	0.871799
CBV_PAM6043_c0_g1_i1	-0.557807	-0.167438	-0.099586	0.824831
CBV_PAM30998_c0_g1_i1	-0.395271	-0.347897	-0.115703	0.85887
CBV_PAM65225_c2_g1_i1	-0.449338	-0.153854	-0.253734	0.856925
CBV_PAM1222_c0_g2_i1	-0.254049	-0.447582	-0.154542	0.856173
CBV_PAM33432_c0_g1_i1	-0.589891	0.176643	-0.320885	0.734134
CBV_PAM24264_c1_g1_i1	-0.0497937	-0.486575	-0.296443	0.832812
CBV_PAM13460_c1_g1_i1	-0.610615	-0.357681	0.324408	0.643888
CBV_PAM11170_c0_g1_i1	-0.359411	-0.227208	-0.282043	0.868662
CBV_PAM23650_c0_g1_i1	-0.56568	-0.437278	0.520479	0.482479
CBV_PAM37708_c0_g1_i1	-0.544741	-0.0568594	-0.215617	0.817217
CBV_PAM2399_c2_g1_i1	-0.448869	0.0752466	-0.419519	0.793141
CBV_PAM25996_c0_g1_i1	0.125684	-0.847935	0.271542	0.450709
CBV_PAM54010_c0_g1_i1	-0.107603	-0.428592	-0.311719	0.847913
CBV_PAM17696_c0_g1_i1	-0.380232	-0.35204	-0.120403	0.852674
CBV_PAM37703_c1_g1_i1	0.0703557	-0.780474	0.0904005	0.619717
CBV_PAM54376_c0_g1_i1	-0.116774	-0.567945	-0.122782	0.807501
CBV_PAM4284_c0_g1_i1	0.0235662	-0.635826	-0.145904	0.758164
CBV_PAM54296_c0_g1_i1	-0.143667	-0.6422	0.0332508	0.752617
CBV_PAM25626_c0_g1_i1	-0.538922	-0.0990569	-0.178885	0.816863
CBV_PAM2092_c0_g1_i1	-0.134529	-0.476562	-0.226825	0.837916
CBV_PAM39611_c0_g1_i1	-0.224732	-0.263918	-0.371563	0.860213
CBV_PAM18802_c0_g1_i1	-0.524473	-0.312863	0.0487963	0.78854
CBV_PAM43610_c1_g1_i1	-0.63253	-0.285096	0.24179	0.675836
CBV_PAM795_c0_g1_i1	-0.471246	-0.396222	0.0874351	0.780033
CBV_PAM17242_c0_g1_i1	-0.470143	-0.0607234	-0.295116	0.825982
CBV_PAM290_c1_g1_i1	-0.599708	-0.323536	0.237602	0.685643
CBV_PAM10212_c0_g1_i1	-0.152574	-0.385678	-0.310181	0.848433
CBV_PAM18722_c0_g1_i1	-0.47136	-0.402978	0.104606	0.769732
CBV_PAM37234_c0_g1_i1	-0.198832	-0.119746	-0.505248	0.823826
CBV_PAM25172_c0_g1_i1	-0.326657	-0.402	-0.111631	0.840288
CBV_PAM37772_c1_g1_i1	-0.307261	-0.065229	-0.451947	0.824437
CBV_PAM42622_c1_g1_i1	-0.538987	-0.358986	0.166354	0.731619
CBV_PAM16896_c0_g1_i1	-0.515867	-0.00553071	-0.276107	0.797505
CBV_PAM54788_c0_g1_i1	-0.659833	-0.166771	0.120943	0.705661
CBV_PAM5634_c0_g1_i1	-0.459898	-0.522714	0.447818	0.534794
CBV_PAM70045_c0_g1_i1	-0.656038	-0.0512602	-0.024803	0.732101
CBV_PAM25119_c0_g1_i1	-0.59374	-0.241919	0.0950444	0.740614
CBV_PAM7107_c0_g1_i1	-0.305269	-0.253788	-0.292109	0.851166
CBV_PAM68918_c0_g1_i1	-0.295984	-0.192271	-0.35694	0.845194
CBV_PAM16326_c0_g1_i1	-0.186857	-0.337576	-0.320683	0.845116
CBV_PAM26020_c1_g1_i1	-0.404894	0.00582309	-0.401255	0.800327
CBV_PAM682_c0_g1_i1	-0.403508	-0.2354	-0.200879	0.839787
CBV_PAM51125_c0_g1_i1	-0.332695	-0.458315	-0.010577	0.801587
CBV_PAM10930_c0_g1_i1	-0.282988	-0.282988	-0.282988	0.848963
CBV_PAM14034_c0_g1_i1	-0.504867	-0.279723	-0.00384757	0.788437
CBV_PAM65133_c0_g1_i1	-0.270872	-0.554609	0.0716926	0.753789
CBV_PAM3131_c0_g1_i1	-0.0548321	-0.573448	-0.146157	0.774438
CBV_PAM2957_c0_g1_i1	-0.194192	-0.391971	-0.249374	0.835537
CBV_PAM68425_c0_g1_i1	-0.504924	-0.239657	-0.0520317	0.796612
CBV_PAM37178_c0_g1_i1	-0.320004	-0.264264	-0.257763	0.842031
CBV_PAM704_c0_g5_i1	-0.281015	-0.281015	-0.281015	0.843045
CBV_PAM64227_c0_g1_i1	-0.103168	-0.390176	-0.328788	0.822132
CBV_PAM943_c0_g1_i1	-0.329723	-0.38839	-0.103783	0.821896
CBV_PAM21751_c0_g1_i1	-0.286635	-0.146355	-0.394757	0.827746
CBV_PAM19183_c0_g1_i1	-0.129938	-0.731627	0.330927	0.530638
CBV_PAM33430_c0_g1_i1	-0.390454	-0.54264	0.296733	0.636361
CBV_PAM12153_c2_g1_i1	-0.625931	-0.290605	0.311394	0.605142
CBV_PAM11437_c0_g1_i1	-0.586699	-0.00961789	-0.158061	0.754378
CBV_PAM11526_c0_g1_i1	-0.402277	0.121859	-0.45942	0.739839
CBV_PAM52711_c2_g1_i1	-0.536954	-0.142314	-0.105081	0.784349
CBV_PAM37187_c1_g1_i1	-0.489514	-0.353935	0.0951506	0.748298
CBV_PAM4556_c0_g1_i1	-0.422239	-0.073579	-0.311671	0.807489
CBV_PAM1358_c0_g6_i1	-0.472904	0.341906	-0.472904	0.603902
CBV_PAM46542_c0_g1_i1	-0.464856	-0.24428	-0.0932753	0.802411
CBV_PAM69701_c0_g4_i1	-0.383206	-0.0266389	-0.383206	0.793051
CBV_PAM14143_c0_g1_i1	-0.429315	0.0635242	-0.394447	0.760238
CBV_PAM13057_c0_g1_i1	-0.0503536	-0.634796	-0.0322263	0.717376
CBV_PAM28258_c0_g1_i1	-0.211526	-0.666535	0.287415	0.590646
CBV_PAM10191_c0_g1_i1	-0.293432	-0.278097	-0.259068	0.830597
CBV_PAM65882_c0_g1_i1	-0.57128	-0.257692	0.11282	0.716152
CBV_PAM11677_c0_g1_i1	-0.207554	-0.632858	0.176908	0.663503
CBV_PAM4938_c0_g1_i1	-0.405272	-0.318927	-0.0773131	0.801512
CBV_PAM24055_c0_g1_i1	-0.613132	0.0570199	-0.15719	0.713301
CBV_PAM37973_c0_g1_i1	-0.238732	-0.0742251	-0.475102	0.788059
CBV_PAM1341_c0_g1_i1	-0.503844	-0.24526	-0.0205397	0.769644
CBV_PAM69447_c0_g1_i1	-0.22665	-0.165455	-0.416755	0.808861
CBV_PAM18741_c0_g1_i1	-0.595471	-0.00727631	-0.12816	0.730908
CBV_PAM43839_c0_g1_i1	-0.00464657	-0.506031	-0.253921	0.764599
CBV_PAM24087_c0_g1_i1	-0.287215	-0.328796	-0.204246	0.820257
CBV_PAM11121_c0_g1_i1	-0.572659	0.0132845	-0.178221	0.737595
CBV_PAM32995_c0_g1_i1	-0.275163	-0.0826532	-0.436037	0.793853
CBV_PAM38643_c0_g1_i1	-0.303158	-0.0901406	-0.404371	0.797669
CBV_PAM3832_c0_g1_i1	-0.628278	-0.0848438	0.00905527	0.704066
CBV_PAM64402_c0_g1_i1	-0.306643	-0.15395	-0.349114	0.809707
CBV_PAM5286_c1_g1_i1	-0.369643	-0.0602903	-0.3603	0.790234
CBV_PAM13813_c0_g1_i1	-0.371581	-0.121808	-0.309995	0.803385
CBV_PAM16006_c0_g1_i1	-0.540721	-0.103491	-0.115573	0.759784
CBV_PAM11595_c0_g1_i1	-0.428704	-0.0905914	-0.272493	0.791788
CBV_PAM41205_c0_g1_i1	-0.565837	-0.0179256	-0.156318	0.740081
CBV_PAM543_c3_g1_i1	-0.5473	-0.253966	0.0798154	0.72145
CBV_PAM854_c0_g1_i1	-0.419259	-0.358456	0.0126197	0.765095
CBV_PAM65442_c0_g1_i1	-0.523629	-0.310224	0.128195	0.705658
CBV_PAM5971_c0_g1_i1	-0.422138	-0.0837747	-0.280891	0.786804
CBV_PAM50707_c0_g1_i1	-0.414722	-0.25813	-0.119477	0.792329
CBV_PAM24285_c0_g14_i1	-0.523761	-0.116985	-0.118639	0.759385
CBV_PAM55093_c0_g1_i1	-0.537112	-0.23025	0.0365338	0.730828
CBV_PAM52832_c0_g1_i1	-0.560628	-0.244403	0.103597	0.701434
CBV_PAM128_c0_g1_i1	-0.613384	-0.161715	0.0926543	0.682445
CBV_PAM45549_c0_g1_i1	-0.234439	-0.00999904	-0.506295	0.750733
CBV_PAM10631_c0_g1_i1	-0.135537	-0.706424	0.408922	0.433039
CBV_PAM51086_c0_g1_i1	-0.501268	-0.292197	0.0652131	0.728252
CBV_PAM68289_c0_g1_i1	-0.426105	0.0285878	-0.35327	0.750787
CBV_PAM72091_c0_g1_i1	-0.341022	-0.167454	-0.29164	0.800116
CBV_PAM66190_c0_g1_i1	-0.406094	-0.330701	-0.0307783	0.767574
CBV_PAM730_c1_g1_i1	-0.488265	-0.256736	-0.00327403	0.748276
CBV_PAM1546_c0_g2_i1	-0.555346	-0.204229	0.0440351	0.715539
CBV_PAM66354_c0_g1_i1	-0.410472	0.00574602	-0.351461	0.756187
CBV_PAM24146_c0_g1_i1	-0.527056	-0.187986	-0.0258671	0.740908
CBV_PAM38804_c0_g1_i1	-0.482479	-0.255614	-0.0117547	0.749848
CBV_PAM23936_c1_g1_i1	-0.33116	0.493256	-0.577438	0.415342
CBV_PAM51426_c3_g1_i1	-0.493298	-0.207506	-0.0534957	0.7543
CBV_PAM38274_c0_g1_i1	-0.356671	-0.345267	-0.0757318	0.77767
CBV_PAM40434_c0_g1_i1	-0.473624	-0.377219	0.17311	0.677733
CBV_PAM54826_c0_g1_i1	-0.494681	-0.412694	0.337999	0.569376
CBV_PAM38730_c0_g5_i1	-0.34761	-0.294362	-0.14759	0.789562
CBV_PAM25614_c0_g1_i1	-0.543015	-0.252933	0.101046	0.694902
CBV_PAM64184_c2_g1_i1	-0.486805	-0.0818109	-0.188176	0.756792
CBV_PAM6246_c0_g1_i1	-0.508272	-0.0489535	-0.188102	0.745328
CBV_PAM10659_c0_g1_i1	-0.140274	-0.356323	-0.290836	0.787434
CBV_PAM53218_c0_g1_i1	-0.190654	0.205418	-0.628636	0.613872
CBV_PAM38165_c0_g1_i1	-0.525114	-0.252249	0.0656572	0.711705
CBV_PAM28356_c0_g1_i1	-0.518429	0.0834204	-0.27118	0.706188
CBV_PAM24129_c0_g1_i1	-0.348899	-0.118779	-0.314728	0.782405
CBV_PAM21947_c0_g1_i1	-0.296571	-0.196391	-0.299951	0.792913
CBV_PAM14459_c0_g1_i1	-0.456172	-0.316439	0.0431078	0.729503
CBV_PAM51472_c0_g1_i1	-0.539384	-0.013076	-0.16967	0.72213
CBV_PAM42592_c0_g1_i1	-0.491488	-0.352809	0.179231	0.665067
CBV_PAM12884_c0_g1_i1	-0.397107	-0.386592	0.0564882	0.727211
CBV_PAM65085_c0_g1_i1	-0.26554	-0.411561	-0.0907883	0.767889
CBV_PAM69138_c0_g1_i1	-0.35618	-0.363607	-0.0397637	0.759551
CBV_PAM18072_c0_g1_i1	-0.586231	0.150759	-0.216012	0.651484
CBV_PAM25713_c0_g1_i1	-0.601201	-0.0859178	0.00310153	0.684017
CBV_PAM11066_c0_g1_i1	-0.567018	-0.0330427	-0.108396	0.708457
CBV_PAM25278_c0_g1_i1	-0.597035	-0.2607	0.281286	0.576448
CBV_PAM50902_c1_g1_i1	-0.583785	-0.147267	0.0470043	0.684047
CBV_PAM64939_c0_g1_i1	0.0383292	-0.472737	-0.288845	0.723252
CBV_PAM64513_c3_g1_i1	-0.475144	-0.421963	0.34083	0.556277
CBV_PAM26742_c0_g1_i1	-0.572955	-0.281657	0.259351	0.595262
CBV_PAM64884_c0_g1_i1	0.0745386	-0.526144	-0.245804	0.69741
CBV_PAM71634_c0_g1_i1	-0.407956	-0.458926	0.238303	0.628579
CBV_PAM23589_c0_g1_i1	-0.549154	-0.122124	-0.0428726	0.714151
CBV_PAM23921_c0_g1_i1	-0.589148	-0.13418	0.0442807	0.679047
CBV_PAM52418_c1_g1_i1	-0.603505	-0.195876	0.172607	0.626774
CBV_PAM684_c0_g1_i1	-0.267357	-0.160963	-0.349407	0.777727
CBV_PAM58545_c0_g1_i1	-0.519715	-0.380949	0.484026	0.416638
CBV_PAM64742_c0_g6_i1	0.282559	-0.784179	0.220244	0.281376
CBV_PAM37322_c1_g1_i1	-0.364947	-0.405742	0.0503595	0.72033
CBV_PAM702_c0_g1_i1	-0.541426	-0.248257	0.121489	0.668193
CBV_PAM50816_c0_g1_i1	-0.146593	-0.456595	-0.147846	0.751034
CBV_PAM52623_c0_g1_i1	-0.131892	-0.655401	0.227427	0.559867
CBV_PAM47829_c0_g1_i1	-0.441013	-0.103454	-0.206672	0.751138
CBV_PAM24842_c0_g1_i1	-0.0101647	-0.597558	-0.062391	0.670114
CBV_PAM40309_c0_g1_i1	-0.589089	-0.173048	0.115695	0.646443
CBV_PAM25471_c0_g1_i1	-0.399888	-0.324064	-0.00856758	0.732519
CBV_PAM67368_c0_g1_i1	-0.355385	-0.0586472	-0.333951	0.747983
CBV_PAM50669_c0_g3_i1	-0.377663	-0.453679	0.187679	0.643662
CBV_PAM37365_c4_g1_i1	-0.591	-0.0775615	0.00419806	0.664364
CBV_PAM841_c0_g1_i1	-0.590386	-0.175408	0.134233	0.631561
CBV_PAM10909_c0_g1_i1	-0.428886	-0.368852	0.119505	0.678232
CBV_PAM3372_c0_g1_i1	-0.416574	-0.190687	-0.142998	0.75026
CBV_PAM926_c0_g1_i1	-0.266215	-0.40322	-0.073754	0.743189
CBV_PAM4076_c0_g4_i1	-0.21645	0.0231583	-0.505221	0.698513
CBV_PAM51725_c1_g1_i1	-0.402849	-0.199449	-0.149807	0.752105
CBV_PAM10459_c0_g1_i1	-0.16147	-0.0274243	-0.515719	0.704614
CBV_PAM40004_c0_g1_i1	0.248824	-0.76377	0.197138	0.317808
CBV_PAM901_c1_g1_i1	-0.387856	-0.114049	-0.246829	0.748734
CBV_PAM10454_c0_g1_i1	-0.0604682	-0.690098	0.267202	0.483364
CBV_PAM50974_c0_g1_i1	-0.458146	-0.0850151	-0.18588	0.729041
CBV_PAM673_c3_g2_i1	-0.369645	0.0972824	-0.41132	0.683682
CBV_PAM29414_c1_g1_i1	-0.506941	-0.129655	-0.0723931	0.708988
CBV_PAM12258_c0_g1_i1	-0.328803	-0.501005	0.217058	0.61275
CBV_PAM37274_c0_g1_i1	-0.557607	-0.148525	0.0374914	0.668641
CBV_PAM66330_c0_g1_i1	-0.52702	-0.0970109	-0.074462	0.698493
CBV_PAM64134_c0_g5_i1	0.05013	-0.546592	-0.173482	0.669944
CBV_PAM2048_c0_g1_i1	-0.139638	-0.239157	-0.3725	0.751296
CBV_PAM64546_c0_g1_i1	0.0494994	-0.454615	-0.290768	0.695883
CBV_PAM40367_c0_g1_i1	-0.0230538	-0.388758	-0.314092	0.725903
CBV_PAM14527_c0_g1_i1	-0.340282	-0.00588996	-0.375211	0.721383
CBV_PAM989_c1_g1_i1	-0.0554201	-0.52389	-0.116722	0.696032
CBV_PAM30421_c0_g1_i1	-0.0662877	-0.365578	-0.305531	0.737396
CBV_PAM25447_c0_g1_i1	-0.513953	-0.0607199	-0.126142	0.700815
CBV_PAM23634_c0_g1_i1	-0.561124	0.00796323	-0.115145	0.668305
CBV_PAM28068_c0_g1_i1	-0.396089	-0.352123	0.0470486	0.701163
CBV_PAM10225_c0_g1_i1	-0.0386897	-0.490996	-0.177641	0.707327
CBV_PAM10374_c0_g1_i1	-0.271528	-0.353352	-0.123663	0.748543
CBV_PAM25531_c1_g2_i1	-0.397354	0.130486	-0.397354	0.664221
CBV_PAM64588_c0_g1_i1	0.00324034	-0.666128	0.561189	0.101698
CBV_PAM38744_c0_g1_i1	-0.491106	0.0575019	-0.246881	0.680485
CBV_PAM37387_c0_g1_i1	0.00775281	-0.538683	-0.145155	0.676086
CBV_PAM64438_c0_g1_i1	-0.209012	-0.369767	-0.168824	0.747604
CBV_PAM3468_c0_g1_i1	-0.56945	-0.00575265	-0.0847105	0.659913
CBV_PAM51290_c1_g1_i1	0.103415	-0.49713	-0.267229	0.660944
CBV_PAM4194_c0_g1_i1	-0.562414	-0.207917	0.15086	0.619471
CBV_PAM23682_c0_g7_i1	-0.252616	-0.252616	-0.252616	0.757848
CBV_PAM10610_c0_g3_i1	-0.22865	-0.0724054	-0.42447	0.725525
CBV_PAM51248_c1_g1_i1	-0.218039	-0.317784	-0.217853	0.753676
CBV_PAM23681_c0_g4_i1	-0.346155	-0.0307032	-0.346155	0.723014
CBV_PAM64609_c0_g1_i1	-0.383767	-0.310349	-0.0249027	0.71902
CBV_PAM50856_c0_g1_i1	-0.257173	-0.221642	-0.275499	0.754314
CBV_PAM45680_c0_g1_i1	-0.255461	-0.347422	-0.141323	0.744207
CBV_PAM14772_c0_g1_i1	0.135813	-0.546946	-0.216776	0.627909
CBV_PAM1308_c0_g2_i1	-0.504539	-0.207887	0.0346562	0.677769
CBV_PAM27329_c0_g1_i1	-0.449402	-0.161908	-0.108301	0.719611
CBV_PAM13120_c0_g1_i1	-0.0824652	-0.611871	0.0917424	0.602594
CBV_PAM38679_c0_g1_i1	-0.462545	-0.324814	0.149415	0.637944
CBV_PAM64569_c0_g1_i1	-0.568911	-0.0755229	-0.00201063	0.646444
CBV_PAM14753_c0_g1_i1	-0.623566	-0.113644	0.176743	0.560468
CBV_PAM10490_c0_g1_i1	-0.489267	-0.188739	-0.00850157	0.686507
CBV_PAM65247_c0_g1_i1	-0.20689	-0.473524	-0.0113248	0.691739
CBV_PAM15679_c0_g1_i1	-0.281833	-0.0912482	-0.355557	0.728638
CBV_PAM37772_c0_g1_i1	-0.523194	-0.283494	0.223442	0.583246
CBV_PAM50926_c0_g2_i1	-0.186778	-0.393603	-0.148982	0.729362
CBV_PAM71526_c0_g1_i1	-0.537884	-0.285447	0.284833	0.538499
CBV_PAM17041_c0_g1_i1	-0.465484	0.0284708	-0.244218	0.681231
CBV_PAM12305_c0_g1_i1	-0.265043	0.104931	-0.488605	0.648717
CBV_PAM55681_c0_g1_i1	-0.532517	-0.212813	0.114867	0.630462
CBV_PAM37973_c1_g1_i1	-0.181115	-0.618187	0.350852	0.448451
CBV_PAM65625_c1_g1_i1	-0.364446	0.141001	-0.41813	0.641576
CBV_PAM51062_c0_g1_i1	-0.494517	-0.356713	0.376834	0.474395
CBV_PAM11317_c0_g1_i1	-0.449966	-0.289205	0.0705649	0.668605
CBV_PAM65664_c0_g5_i1	-0.45748	-0.153903	-0.0920597	0.703443
CBV_PAM65616_c0_g1_i1	-0.461695	0.0541897	-0.263507	0.671012
CBV_PAM24897_c0_g1_i1	-0.613266	-0.0113299	0.0258458	0.59875
CBV_PAM24487_c1_g1_i1	-0.436096	-0.0103517	-0.248089	0.694537
CBV_PAM37353_c0_g1_i1	-0.413175	-0.189778	-0.113755	0.716708
CBV_PAM23907_c0_g1_i1	-0.567056	-0.20525	0.197552	0.574755
CBV_PAM15778_c0_g1_i1	-0.464529	-0.139889	-0.0932406	0.69766
CBV_PAM76086_c0_g1_i1	-0.450453	-0.15138	-0.101434	0.703266
CBV_PAM10987_c0_g1_i1	-0.237791	-0.561088	0.260284	0.538595
CBV_PAM40277_c0_g1_i1	-0.493331	-0.282827	0.159472	0.616686
CBV_PAM4572_c0_g1_i1	-0.549355	-0.253545	0.259609	0.543291
CBV_PAM52851_c0_g1_i1	-0.485444	-0.231239	0.0565351	0.660148
CBV_PAM10255_c2_g1_i1	-0.451149	-0.249118	0.0211045	0.679162
CBV_PAM51089_c0_g1_i1	-0.568316	-0.129023	0.0799527	0.617386
CBV_PAM45645_c0_g1_i1	-0.501107	-0.183433	0.0213593	0.66318
CBV_PAM24801_c1_g1_i1	-0.577725	-0.114615	0.0854699	0.60687
CBV_PAM48206_c0_g1_i1	-0.555682	-0.0588225	-0.0250393	0.639544
CBV_PAM201_c1_g1_i1	-0.440077	-0.317259	0.113527	0.643809
CBV_PAM23603_c0_g1_i1	-0.589042	-0.144986	0.166526	0.567503
CBV_PAM41241_c0_g1_i1	-0.560023	-0.130517	0.0728047	0.617736
CBV_PAM10184_c0_g1_i1	-0.29316	-0.156205	-0.278393	0.727758
CBV_PAM54050_c0_g1_i1	-0.502044	-0.119952	-0.0478604	0.669857
CBV_PAM10581_c0_g3_i1	0.112893	-0.703583	0.421683	0.169007
CBV_PAM41480_c0_g1_i1	-0.46027	-0.152803	-0.0740061	0.687079
CBV_PAM10697_c1_g1_i1	-0.524294	-0.108367	-0.0171534	0.649815
CBV_PAM12827_c0_g1_i1	-0.513456	-0.0555313	-0.0899888	0.658976
CBV_PAM15012_c0_g1_i1	0.0697792	-0.535108	-0.158927	0.624255
CBV_PAM1197_c0_g1_i1	-0.345342	-0.0290924	-0.320475	0.69491
CBV_PAM59649_c0_g1_i1	-0.497583	-0.241346	0.118494	0.620435
CBV_PAM23807_c0_g1_i1	-0.443231	0.224397	-0.356294	0.575128
CBV_PAM11747_c0_g1_i1	0.213699	-0.613487	-0.116462	0.516249
CBV_PAM64382_c1_g1_i1	-0.191406	-0.485128	0.021918	0.654616
CBV_PAM37827_c0_g1_i1	-0.444032	-0.262831	0.0502784	0.656585
CBV_PAM65531_c0_g1_i1	-0.313925	-0.224893	-0.18069	0.719508
CBV_PAM37791_c0_g1_i1	-0.0903025	-0.311539	-0.302486	0.704327
CBV_PAM50977_c0_g1_i1	-0.381835	-0.282958	-0.0162222	0.681016
CBV_PAM40326_c0_g1_i1	0.264277	-0.672929	-0.000288293	0.40894
CBV_PAM53716_c1_g1_i1	-0.187386	-0.152558	-0.365253	0.705197
CBV_PAM38283_c0_g1_i1	-0.51684	0.181341	-0.239278	0.574777
CBV_PAM52199_c0_g1_i1	-0.167312	-0.172206	-0.364975	0.704494
CBV_PAM38579_c1_g1_i1	-0.50438	0.0299302	-0.162125	0.636575
CBV_PAM51046_c0_g1_i1	0.0317246	-0.525906	-0.131177	0.625358
CBV_PAM12548_c0_g1_i1	-0.567647	-0.184557	0.225693	0.52651
CBV_PAM11259_c0_g2_i1	-0.348771	-0.473501	0.424681	0.397591
CBV_PAM24681_c1_g1_i1	-0.318405	-0.390415	0.0603965	0.648423
CBV_PAM37647_c2_g1_i1	-0.414819	0.399143	-0.407782	0.423457
CBV_PAM50705_c0_g1_i1	0.0302141	-0.438994	-0.242577	0.651357
CBV_PAM64732_c0_g1_i1	-0.531223	-0.0429775	-0.0494208	0.623621
CBV_PAM37430_c0_g1_i1	-0.50985	-0.21372	0.130064	0.593506
CBV_PAM37688_c0_g1_i1	-0.448465	-0.022448	-0.190144	0.661057
CBV_PAM25096_c0_g1_i1	-0.57469	0.0134112	-0.0239879	0.585267
CBV_PAM14290_c0_g1_i1	-0.525621	-0.0744185	-0.024375	0.624414
CBV_PAM38091_c0_g1_i1	-0.465107	-0.175926	-0.00933315	0.650366
CBV_PAM26280_c0_g1_i1	-0.492308	-0.151561	0.0114952	0.632374
CBV_PAM41652_c0_g1_i1	-0.44291	-0.159998	-0.0597015	0.662609
CBV_PAM65991_c0_g1_i1	-0.396409	-0.144032	-0.142184	0.682625
CBV_PAM2781_c0_g1_i1	-0.53557	-0.0890804	0.0204069	0.604243
CBV_PAM23974_c1_g1_i1	-0.528022	-0.164772	0.108281	0.584513
CBV_PAM11439_c0_g1_i1	0.0527263	-0.344213	-0.351023	0.642509
CBV_PAM25003_c0_g1_i1	-0.211262	-0.418499	-0.030861	0.660622
CBV_PAM57113_c0_g1_i1	-0.206906	-0.256506	-0.236301	0.699713
CBV_PAM50870_c0_g1_i1	-0.165945	-0.283026	-0.246807	0.695778
CBV_PAM65819_c0_g1_i1	0.0647184	-0.423884	-0.269285	0.62845
CBV_PAM52524_c0_g1_i1	-0.468767	-0.0610337	-0.112891	0.642692
CBV_PAM32827_c0_g1_i1	-0.410546	-0.243827	0.00577564	0.648597
CBV_PAM68130_c0_g1_i1	-0.158125	0.0918629	-0.518397	0.584659
CBV_PAM39721_c0_g1_i1	-0.177124	-0.302634	-0.210127	0.689885
CBV_PAM13206_c0_g1_i1	-0.499192	-0.223603	0.159871	0.562924
CBV_PAM1175_c1_g1_i1	-0.430468	-0.096098	-0.128738	0.655304
CBV_PAM4876_c0_g1_i1	-0.191342	0.0090344	-0.450408	0.632716
CBV_PAM64363_c1_g1_i1	-0.47118	-0.0263776	-0.132885	0.630442
CBV_PAM10179_c0_g1_i1	-0.11419	-0.432127	-0.106648	0.652964
CBV_PAM24562_c0_g2_i1	-0.270199	0.072267	-0.42039	0.618322
CBV_PAM64232_c0_g1_i1	-0.342993	-0.126163	-0.208491	0.677648
CBV_PAM24838_c0_g1_i1	-0.310241	-0.264138	-0.10303	0.677409
CBV_PAM64672_c0_g1_i1	-0.256156	-0.377613	-0.0181735	0.651943
CBV_PAM30809_c0_g1_i1	-0.478594	-0.300926	0.318801	0.460718
CBV_PAM51005_c0_g1_i1	-0.46711	-0.116277	-0.0470284	0.630415
CBV_PAM37623_c0_g2_i1	-0.319613	-0.319613	-0.0139932	0.653219
CBV_PAM11052_c0_g1_i1	-0.0859791	-0.303336	-0.282533	0.671849
CBV_PAM55380_c0_g1_i1	-0.391151	-0.390287	0.298632	0.482805
CBV_PAM52551_c0_g1_i1	-0.364892	-0.237519	-0.0556918	0.658103
CBV_PAM2056_c0_g1_i1	-0.408536	-0.189526	-0.0489586	0.647021
CBV_PAM51141_c0_g1_i1	-0.446643	-0.0242317	-0.159778	0.630653
CBV_PAM39408_c0_g1_i1	-0.348436	-0.348436	0.0865153	0.610356
CBV_PAM23876_c0_g1_i1	0.0536399	-0.481511	-0.170426	0.598298
CBV_PAM40192_c0_g1_i1	-0.422244	-0.233484	0.0330797	0.622649
CBV_PAM51983_c0_g1_i1	-0.191542	-0.266157	-0.223291	0.680991
CBV_PAM66835_c0_g1_i1	-0.0441043	-0.432476	-0.16076	0.637341
CBV_PAM38504_c0_g1_i1	-0.328905	-0.237654	-0.100984	0.667543
CBV_PAM205_c0_g1_i1	-0.411309	-0.187608	-0.0430435	0.641961
CBV_PAM2014_c0_g1_i1	-0.517742	0.00574156	-0.0714594	0.583459
CBV_PAM37296_c0_g1_i1	0.101061	-0.354146	-0.344393	0.597478
CBV_PAM48711_c0_g1_i1	-0.514279	-0.204306	0.208015	0.51057
CBV_PAM53616_c2_g1_i1	-0.493004	0.157857	-0.208759	0.543906
CBV_PAM10275_c0_g1_i1	-0.278341	-0.131609	-0.257908	0.667857
CBV_PAM24464_c0_g1_i1	-0.518608	-0.0371561	-0.0236164	0.57938
CBV_PAM14674_c0_g1_i1	-0.495825	-0.222643	0.197894	0.520575
CBV_PAM38298_c0_g1_i1	-0.423829	-0.131702	-0.078664	0.634194
CBV_PAM38349_c1_g1_i1	-0.418194	0.136625	-0.289437	0.571007
CBV_PAM64345_c0_g1_i1	-0.360375	-0.293768	0.0329773	0.621165
CBV_PAM38151_c0_g1_i1	-0.53555	0.0429013	-0.0643935	0.557042
CBV_PAM806_c0_g2_i1	-0.628616	0.00598683	0.228124	0.394506
CBV_PAM37828_c0_g1_i1	-0.239596	-0.202432	-0.228638	0.670666
CBV_PAM46824_c0_g1_i1	-0.423364	-0.161879	-0.0415207	0.626764
CBV_PAM14094_c0_g1_i1	-0.421328	-0.251991	0.0797779	0.593541
CBV_PAM800_c0_g1_i1	-0.564672	-0.0131134	0.0505776	0.527208
CBV_PAM69644_c0_g1_i1	-0.388304	-0.225367	-0.0166747	0.630346
CBV_PAM59774_c0_g1_i1	-0.222953	-0.133176	-0.305653	0.661782
CBV_PAM757_c0_g1_i1	-0.404433	-0.238562	0.0288067	0.614189
CBV_PAM41167_c0_g1_i1	-0.455254	-0.14615	-0.00455896	0.605963
CBV_PAM51020_c0_g1_i1	-0.375108	0.00278228	-0.252845	0.625171
CBV_PAM57472_c0_g1_i1	-0.425843	-0.261571	0.110288	0.577126
CBV_PAM51526_c0_g1_i1	-6.29583e-05	-0.457661	-0.144066	0.60179
CBV_PAM50750_c1_g1_i1	-0.252134	-0.037246	-0.346963	0.636343
CBV_PAM50695_c0_g4_i1	-0.371752	-0.270401	0.0276112	0.614541
CBV_PAM51567_c0_g1_i1	-0.342538	-0.135539	-0.172695	0.650772
CBV_PAM11447_c0_g1_i1	-0.515104	-0.123219	0.0912487	0.547075
CBV_PAM2644_c0_g1_i1	-0.509197	-0.175147	0.16428	0.520064
CBV_PAM2167_c0_g1_i1	-0.371998	-0.238286	-0.0154916	0.625776
CBV_PAM64138_c0_g1_i1	-0.455792	-0.189221	0.0629423	0.582071
CBV_PAM23687_c0_g1_i1	-0.433296	0.034405	-0.197032	0.595923
CBV_PAM71763_c0_g1_i1	-0.25825	-0.0934244	-0.295809	0.647483
CBV_PAM10442_c0_g1_i1	-0.294771	-0.274166	-0.0743899	0.643327
CBV_PAM11260_c0_g1_i1	-0.435453	-0.140566	-0.0307546	0.606774
CBV_PAM52246_c0_g1_i1	-0.376338	-0.229209	-0.0140777	0.619625
CBV_PAM12849_c0_g1_i1	-0.341909	-0.125501	-0.174994	0.642404
CBV_PAM27026_c0_g1_i1	-0.452017	-0.152584	0.0146268	0.589974
CBV_PAM67260_c0_g1_i1	0.00408468	-0.307029	-0.314934	0.617879
CBV_PAM23880_c0_g1_i1	-0.379127	0.0258669	-0.251738	0.604999
CBV_PAM10365_c0_g1_i1	-0.279064	-0.101903	-0.263246	0.644213
CBV_PAM3906_c1_g1_i1	-0.207543	-0.0315216	-0.380079	0.619143
CBV_PAM64656_c0_g1_i1	-0.493227	-0.145933	0.0929853	0.546174
CBV_PAM38564_c0_g1_i1	0.0438942	-0.421928	-0.210014	0.588048
CBV_PAM1123_c0_g1_i1	0.0267811	-0.506341	-0.0724571	0.552017
CBV_PAM66353_c0_g1_i1	0.0763522	-0.399431	-0.255956	0.579035
CBV_PAM24264_c2_g1_i1	-0.362184	-0.233135	-0.0199558	0.615274
CBV_PAM65470_c0_g5_i1	0.0896697	-0.443744	-0.207977	0.562052
CBV_PAM53277_c0_g1_i1	-0.0185949	-0.27132	-0.328346	0.618261
CBV_PAM50832_c1_g1_i1	-0.042139	-0.255398	-0.32702	0.624557
CBV_PAM52117_c0_g1_i1	-0.52623	-0.0495443	0.0446349	0.53114
CBV_PAM39948_c1_g1_i1	-0.500351	-0.0807835	0.0283472	0.552787
CBV_PAM10654_c0_g1_i1	-0.444778	-0.156703	0.0182403	0.58324
CBV_PAM721_c1_g1_i1	-0.360061	-0.271979	0.0340304	0.598009
CBV_PAM11132_c2_g1_i1	-0.425452	-0.0208926	-0.151584	0.597928
CBV_PAM25398_c0_g1_i1	-0.112845	-0.262355	-0.264295	0.639494
CBV_PAM10678_c0_g1_i1	-0.123311	-0.268007	-0.248487	0.639805
CBV_PAM42379_c0_g2_i1	-0.0071829	-0.501466	-0.0432583	0.551907
CBV_PAM26251_c1_g1_i1	-0.0188572	-0.579303	0.153648	0.444513
CBV_PAM51044_c0_g1_i1	-0.39156	-0.111422	-0.112207	0.615189
CBV_PAM67283_c0_g1_i1	-0.351868	-0.253125	-0.00225396	0.607246
CBV_PAM37625_c0_g1_i1	-0.502425	0.0565805	-0.0931759	0.539021
CBV_PAM4374_c0_g1_i1	-0.494237	-0.109515	0.0616467	0.542105
CBV_PAM53241_c0_g1_i1	-0.464786	-0.148281	0.0536027	0.559465
CBV_PAM37198_c0_g1_i1	-0.123393	-0.329657	-0.176941	0.629991
CBV_PAM64452_c0_g1_i1	-0.301827	-0.216203	-0.115017	0.633048
CBV_PAM64366_c0_g1_i1	-0.426029	-0.128952	-0.0378923	0.592873
CBV_PAM65837_c0_g1_i1	-0.161375	-0.186113	-0.289618	0.637106
CBV_PAM14506_c0_g1_i1	-0.414549	-0.105744	-0.0790209	0.599314
CBV_PAM1338_c0_g1_i1	-0.0705012	-0.0217663	-0.472866	0.565134
CBV_PAM26858_c0_g1_i1	-0.490556	-0.0739931	0.0152055	0.549343
CBV_PAM43256_c0_g1_i1	0.0596392	-0.379693	-0.257305	0.577359
CBV_PAM37909_c0_g1_i1	-0.133307	-0.19142	-0.306699	0.631426
CBV_PAM1381_c2_g1_i1	-0.472382	0.0247906	-0.109798	0.557389
CBV_PAM23844_c0_g1_i1	-0.456559	-0.0896828	-0.0273296	0.573571
CBV_PAM812_c0_g1_i1	-0.424924	-0.081171	-0.086407	0.592502
CBV_PAM38664_c1_g1_i1	-0.431762	-0.0928287	-0.0640223	0.588613
CBV_PAM3767_c0_g1_i1	-0.422976	-0.17728	0.0222918	0.577965
CBV_PAM24331_c1_g4_i1	-0.0544575	-0.0620111	-0.457088	0.573557
CBV_PAM11880_c0_g1_i1	-0.27241	-0.232682	-0.126946	0.632038
CBV_PAM1473_c0_g1_i1	-0.236078	-0.0594305	-0.321728	0.617236
CBV_PAM66466_c1_g1_i1	-0.440846	-0.0284734	-0.109605	0.578925
CBV_PAM10743_c0_g1_i1	-0.471585	-0.136578	0.0631219	0.545041
CBV_PAM51490_c0_g1_i1	-0.0441124	-0.269809	-0.298842	0.612763
CBV_PAM23656_c0_g1_i1	-0.454358	-0.125933	0.0178387	0.562452
CBV_PAM64927_c0_g1_i1	-0.107025	-0.131274	-0.371633	0.609933
CBV_PAM39287_c0_g1_i1	0.158767	-0.606059	0.0780807	0.369211
CBV_PAM10257_c0_g1_i1	-0.516487	-0.105522	0.134659	0.48735
CBV_PAM37922_c0_g1_i1	-0.488045	-0.210211	0.296482	0.401774
CBV_PAM69344_c0_g1_i1	-0.0920309	-0.293706	-0.231464	0.617201
CBV_PAM11590_c0_g1_i1	0.125442	-0.440268	-0.209708	0.524534
CBV_PAM1257_c0_g1_i1	-0.422427	0.0110377	-0.158506	0.569895
CBV_PAM10192_c0_g1_i1	-0.511794	-0.0914959	0.107479	0.495811
CBV_PAM24113_c0_g1_i1	-0.270273	-0.17372	-0.181385	0.625378
CBV_PAM64794_c0_g1_i1	0.200439	-0.451638	-0.227929	0.479127
CBV_PAM11510_c1_g1_i1	-0.514416	0.00374623	0.00176558	0.508904
CBV_PAM40655_c0_g1_i1	0.0264675	-0.432365	-0.152491	0.558389
CBV_PAM1050_c0_g1_i1	-0.52634	0.0463073	-0.012481	0.492513
CBV_PAM954_c0_g1_i1	-0.534624	-0.00701662	0.0597235	0.481917
CBV_PAM64431_c0_g1_i1	-0.371993	-0.146424	-0.0770291	0.595446
CBV_PAM50998_c0_g1_i1	0.405925	-0.546468	-0.0828321	0.223375
CBV_PAM65014_c0_g1_i1	-0.238766	0.183664	-0.434691	0.489793
CBV_PAM12317_c0_g1_i1	0.0687736	-0.554179	0.453952	0.0314534
CBV_PAM64379_c0_g1_i1	-0.178058	-0.217443	-0.226633	0.622134
CBV_PAM37411_c0_g5_i1	-0.475637	-0.0556281	-0.00534202	0.536607
CBV_PAM24175_c2_g1_i1	-0.106811	-0.346547	-0.149013	0.602371
CBV_PAM37301_c0_g1_i1	-0.41138	-0.134897	-0.0261466	0.572423
CBV_PAM57254_c0_g1_i1	-0.453424	-0.101892	0.00819616	0.547119
CBV_PAM65684_c0_g1_i1	-0.273303	-0.296811	-0.0231486	0.593263
CBV_PAM71669_c0_g1_i1	0.0457245	-0.396188	-0.208418	0.558881
CBV_PAM43071_c0_g1_i1	-0.434372	-0.188743	0.0929131	0.530201
CBV_PAM3465_c0_g3_i1	-0.204741	-0.287922	-0.118633	0.611296
CBV_PAM52942_c0_g1_i1	-0.382001	-0.237185	0.0690778	0.550107
CBV_PAM64510_c0_g1_i1	-0.300097	-0.318518	0.0577232	0.560892
CBV_PAM38546_c0_g1_i1	-0.0850478	-0.28113	-0.238653	0.604831
CBV_PAM40956_c0_g1_i1	-0.370248	-0.21961	0.0217121	0.568145
CBV_PAM981_c0_g1_i1	-0.25066	-0.0675848	-0.282254	0.600498
CBV_PAM42828_c0_g1_i1	-0.121494	-0.186059	-0.299518	0.607071
CBV_PAM39745_c0_g1_i1	-0.203998	-0.335148	-0.0530423	0.592188
CBV_PAM37689_c0_g1_i1	-0.420354	-0.0602115	-0.0847116	0.565277
CBV_PAM25365_c0_g1_i1	-0.489578	-0.0342702	0.00816389	0.515684
CBV_PAM50807_c1_g1_i1	-0.222158	-0.312538	-0.0608833	0.595579
CBV_PAM72023_c0_g1_i1	-0.170172	-0.236433	-0.207317	0.613922
CBV_PAM13094_c0_g1_i1	-0.343751	-0.284545	0.0818164	0.54648
CBV_PAM23682_c0_g6_i1	-0.452079	-0.0705131	-0.0197802	0.542373
CBV_PAM54462_c0_g1_i1	-0.132301	-0.458247	0.0694594	0.521089
CBV_PAM37212_c0_g1_i1	-0.026962	-0.18782	-0.364007	0.578789
CBV_PAM50943_c0_g1_i1	-0.29403	-0.0511609	-0.248251	0.593441
CBV_PAM38233_c0_g1_i1	-0.310146	-0.24319	-0.0350523	0.588388
CBV_PAM37582_c0_g1_i1	-0.40164	-0.121576	-0.0451333	0.568349
CBV_PAM51048_c0_g1_i1	-0.400051	0.0506704	-0.197717	0.547098
CBV_PAM3142_c0_g1_i1	-0.307144	-0.319935	0.0826806	0.544398
CBV_PAM50721_c0_g1_i1	-0.158409	-0.319983	-0.119824	0.598216
CBV_PAM37711_c0_g1_i1	-0.332148	-0.0122089	-0.233665	0.578022
CBV_PAM24418_c1_g1_i1	-0.095599	0.0223486	-0.456047	0.529297
CBV_PAM64367_c0_g1_i1	-0.0106371	-0.102676	-0.433056	0.54637
CBV_PAM51701_c0_g1_i1	0.0278317	-0.368615	-0.216173	0.556956
CBV_PAM64369_c0_g1_i1	-0.0135548	-0.448738	-0.072963	0.535256
CBV_PAM64157_c0_g1_i1	0.109783	-0.435934	-0.181836	0.507987
CBV_PAM64391_c0_g1_i1	-0.0961761	-0.262606	-0.238067	0.59685
CBV_PAM64306_c0_g1_i1	-0.354077	-0.132079	-0.0957301	0.581887
CBV_PAM10653_c0_g4_i1	-0.372744	-0.185659	-0.00466243	0.563066
CBV_PAM37630_c0_g1_i1	-0.483194	-0.00206996	-0.0187748	0.504039
CBV_PAM52369_c0_g1_i1	0.0582796	-0.271925	-0.333199	0.546845
CBV_PAM13133_c0_g1_i1	-0.131768	-0.15585	-0.305731	0.593348
CBV_PAM66339_c1_g7_i1	-0.361504	-0.321889	0.438849	0.244544
CBV_PAM37826_c0_g1_i1	-0.273593	-0.226718	-0.092623	0.592933
CBV_PAM55779_c0_g1_i1	-0.307145	-0.188008	-0.094122	0.589275
CBV_PAM37315_c0_g1_i1	-0.439655	-0.0448866	-0.0517598	0.536301
CBV_PAM64183_c1_g3_i1	-0.209319	-0.178867	-0.213545	0.601732
CBV_PAM53635_c0_g1_i1	-0.478859	-0.183309	0.305969	0.356198
CBV_PAM51752_c0_g1_i1	-0.402229	-0.202541	0.0841357	0.520635
CBV_PAM692_c0_g1_i1	-0.348904	-0.00369968	-0.208959	0.561562
CBV_PAM13326_c0_g3_i1	-0.299942	0.0540987	-0.299942	0.545785
CBV_PAM65090_c0_g1_i1	-0.0110151	-0.468061	-0.030913	0.509989
CBV_PAM64374_c0_g1_i1	-0.296743	-0.219127	-0.0645484	0.580418
CBV_PAM41810_c0_g1_i1	-0.416625	-0.176737	0.0795189	0.513843
CBV_PAM10631_c0_g2_i1	-0.078395	-0.391208	-0.0854312	0.555034
CBV_PAM51981_c0_g1_i1	0.0706336	-0.262955	-0.340803	0.533124
CBV_PAM24_c3_g1_i1	-0.352958	-0.315861	0.220231	0.448588
CBV_PAM64136_c1_g1_i1	-0.136388	-0.454643	0.103212	0.48782
CBV_PAM67646_c0_g1_i1	-0.387235	0.0781145	-0.212797	0.521918
CBV_PAM24217_c0_g1_i1	-0.309044	-0.0240715	-0.234725	0.567841
CBV_PAM53499_c0_g1_i1	-0.11863	0.121292	-0.472292	0.46963
CBV_PAM51657_c0_g1_i1	-0.450579	-0.177723	0.172416	0.455886
CBV_PAM23955_c0_g1_i1	-0.234991	-0.316297	-0.0110073	0.562295
CBV_PAM11369_c0_g1_i1	-0.21235	-0.336483	-0.0103092	0.559142
CBV_PAM64716_c0_g1_i1	-0.132822	-0.330532	-0.109956	0.573309
CBV_PAM12214_c0_g1_i1	-0.356083	-0.166295	-0.0356013	0.557979
CBV_PAM12490_c0_g1_i1	-0.369229	-0.143871	-0.0411116	0.554211
CBV_PAM39565_c0_g1_i1	-0.413966	-0.042263	-0.0788271	0.535056
CBV_PAM13125_c0_g1_i1	0.0479949	-0.472202	-0.0619903	0.486197
CBV_PAM64287_c0_g1_i1	-0.302346	-0.0499734	-0.217187	0.569506
CBV_PAM37238_c0_g1_i1	-0.0857298	-0.195344	-0.295378	0.576451
CBV_PAM53218_c1_g1_i1	-0.459622	-0.0979334	0.068103	0.489452
CBV_PAM50720_c0_g1_i1	-0.182979	-0.353268	-0.0172785	0.553526
CBV_PAM55147_c0_g1_i1	-0.144926	-0.421653	0.0535374	0.513042
CBV_PAM12096_c0_g1_i1	-0.494538	0.00261695	0.0246713	0.467249
CBV_PAM10460_c0_g1_i1	0.0184773	-0.393565	-0.157068	0.532157
CBV_PAM50695_c0_g3_i1	-0.306702	-0.216043	-0.0427611	0.565506
CBV_PAM54839_c0_g1_i1	0.0623857	-0.522863	0.0337998	0.426677
CBV_PAM24986_c0_g1_i1	-0.0778754	-0.0387471	-0.413815	0.530437
CBV_PAM25144_c0_g1_i1	-0.229676	-0.330977	0.015645	0.545008
CBV_PAM2794_c0_g1_i1	-0.452925	-0.126864	0.103097	0.476692
CBV_PAM11676_c0_g1_i1	0.0347177	-0.384218	-0.177658	0.527157
CBV_PAM11568_c1_g1_i1	-0.0999093	-0.355367	-0.102546	0.557822
CBV_PAM24_c5_g1_i1	-0.311314	-0.145234	-0.114337	0.570885
CBV_PAM10521_c0_g1_i1	-0.0863442	-0.302134	-0.1817	0.570178
CBV_PAM40529_c0_g1_i1	-0.412318	-0.157764	0.06235	0.507732
CBV_PAM39252_c0_g1_i1	-0.413649	-0.0959893	-0.0155841	0.525222
CBV_PAM37265_c0_g7_i1	0.0500759	-0.318533	-0.262502	0.530959
CBV_PAM39651_c0_g1_i1	-0.0339261	-0.488543	0.0636664	0.458803
CBV_PAM64728_c0_g1_i1	-0.430567	-0.163373	0.116779	0.477162
CBV_PAM38972_c0_g1_i1	-0.418385	-0.134625	0.0458249	0.507186
CBV_PAM65672_c0_g1_i1	0.0684412	-0.532233	0.0633238	0.400468
CBV_PAM11649_c0_g1_i1	-0.315283	0.0038283	-0.233174	0.544628
CBV_PAM51872_c1_g1_i1	-0.0208543	-0.380333	-0.134424	0.535611
CBV_PAM64705_c1_g1_i1	-0.236214	-0.268131	-0.0601524	0.564498
CBV_PAM23672_c0_g1_i1	0.189174	-0.543261	0.00943427	0.344652
CBV_PAM37775_c0_g1_i1	-0.164277	-0.303347	-0.0987345	0.566358
CBV_PAM52617_c0_g1_i1	-0.482879	-0.0944965	0.146825	0.43055
CBV_PAM12947_c0_g1_i1	-0.187735	-0.438194	0.201164	0.424765
CBV_PAM64190_c2_g1_i1	0.026174	-0.340774	-0.21794	0.53254
CBV_PAM10206_c0_g1_i1	-0.3767	-0.106878	-0.0559353	0.539514
CBV_PAM66381_c0_g1_i1	-0.0753817	-0.226405	-0.264175	0.565962
CBV_PAM24363_c0_g1_i1	-0.498919	0.0222299	0.0336071	0.443082
CBV_PAM24175_c1_g1_i1	-0.317166	-0.322752	0.185464	0.454454
CBV_PAM66681_c0_g1_i1	0.0724826	-0.269747	-0.318549	0.515813
CBV_PAM51280_c0_g1_i1	-0.375197	-0.055912	-0.107363	0.538471
CBV_PAM1988_c0_g1_i1	-0.166112	-0.148777	-0.258329	0.573218
CBV_PAM52149_c0_g3_i1	-0.231718	-0.252998	-0.0808098	0.565525
CBV_PAM67135_c0_g1_i1	-0.476443	0.00707656	0.00455075	0.464816
CBV_PAM37182_c0_g1_i1	-0.473498	-0.0106093	0.0189746	0.465132
CBV_PAM11847_c0_g1_i1	-0.473978	-0.0807997	0.11125	0.443529
CBV_PAM2707_c0_g1_i1	-0.395534	-0.0714742	-0.0571384	0.524147
CBV_PAM38725_c0_g1_i1	-0.436488	0.10287	-0.135017	0.468635
CBV_PAM52363_c0_g1_i1	-0.407725	-0.00844482	-0.0967238	0.512894
CBV_PAM69756_c0_g1_i1	-0.373751	-0.194565	0.0620109	0.506306
CBV_PAM37762_c0_g1_i1	-0.112942	-0.229227	-0.225051	0.56722
CBV_PAM645_c0_g1_i1	0.0256276	-0.275071	-0.281324	0.530767
CBV_PAM796_c0_g1_i1	-0.0175882	-0.309348	-0.215412	0.542348
CBV_PAM37594_c0_g1_i1	-0.413312	-0.0484959	-0.0488	0.510608
CBV_PAM37468_c1_g1_i1	-0.320499	-0.216642	0.00227186	0.534869
CBV_PAM52402_c0_g1_i1	-0.263851	-0.191971	-0.107749	0.563572
CBV_PAM64740_c1_g1_i1	0.0950831	-0.559568	0.180683	0.283802
CBV_PAM23702_c0_g2_i1	-0.431686	0.108189	-0.140819	0.464315
CBV_PAM39418_c0_g1_i1	-0.0300047	-0.360214	-0.141144	0.531363
CBV_PAM11861_c0_g1_i1	-0.281293	-0.0613685	-0.208278	0.55094
CBV_PAM51076_c0_g1_i1	-0.445393	-0.0299204	-0.00351491	0.478829
CBV_PAM13995_c1_g1_i1	-0.405234	-0.182536	0.123582	0.464188
CBV_PAM11658_c0_g1_i1	-0.298513	-0.171725	-0.0803706	0.550609
CBV_PAM2459_c0_g2_i1	-0.40161	-0.177492	0.105595	0.473507
CBV_PAM68351_c0_g1_i1	-0.0962727	-0.455084	0.104036	0.447321
CBV_PAM66651_c0_g1_i1	0.112701	-0.547434	0.117813	0.31692
CBV_PAM1750_c1_g1_i1	-0.0758011	-0.252226	-0.225459	0.553485
CBV_PAM10631_c1_g1_i1	0.0360895	-0.4638	-0.0296993	0.45741
CBV_PAM778_c0_g1_i1	0.0159599	-0.463148	-0.0120146	0.459203
CBV_PAM17398_c0_g1_i1	-0.151156	-0.200948	-0.211587	0.563691
CBV_PAM10644_c0_g1_i1	-0.112988	-0.344054	-0.079564	0.536606
CBV_PAM11841_c0_g1_i1	-0.0365869	-0.456394	0.0312015	0.46178
CBV_PAM51389_c0_g1_i1	-0.378822	-0.25356	0.228799	0.403584
CBV_PAM26304_c0_g1_i1	-0.154138	-0.187984	-0.218663	0.560785
CBV_PAM26217_c0_g1_i1	-0.162356	-0.13554	-0.258615	0.556511
CBV_PAM11085_c0_g1_i1	0.00894239	-0.310294	-0.223179	0.524531
CBV_PAM37672_c0_g1_i1	0.00950535	-0.390194	-0.122613	0.503302
CBV_PAM10268_c0_g1_i1	0.00287348	-0.400833	-0.101316	0.499276
CBV_PAM24543_c0_g1_i1	-0.065165	-0.108851	-0.353424	0.52744
CBV_PAM23874_c0_g1_i1	-0.329878	-0.202141	0.0133461	0.518673
CBV_PAM23646_c0_g1_i1	-0.0126985	-0.28517	-0.233559	0.531427
CBV_PAM26955_c0_g1_i1	-0.396079	-0.153034	0.0673266	0.481787
CBV_PAM25473_c0_g1_i1	-0.33856	-0.182864	0.00388765	0.517536
CBV_PAM170_c0_g1_i1	0.147418	-0.379784	-0.217111	0.449477
CBV_PAM50717_c0_g1_i1	-0.300959	-0.262842	0.0624788	0.501322
CBV_PAM66509_c0_g1_i1	-0.0279074	-0.348996	-0.143772	0.520676
CBV_PAM69719_c0_g1_i1	-0.0955622	-0.289556	-0.158206	0.543324
CBV_PAM67103_c0_g1_i1	-0.0972495	-0.384518	-0.022912	0.504679
CBV_PAM23681_c1_g1_i1	-0.0710062	-0.101276	-0.350771	0.523053
CBV_PAM38280_c0_g1_i1	-0.136309	-0.245895	-0.16916	0.551364
CBV_PAM25417_c0_g1_i1	-0.380876	-0.106597	-0.0172672	0.50474
CBV_PAM27958_c0_g1_i1	-0.419173	-0.179352	0.190193	0.408332
CBV_PAM38960_c0_g1_i1	-0.450578	-0.14446	0.23371	0.361328
CBV_PAM10718_c1_g1_i1	-0.134969	-0.237034	-0.178192	0.550195
CBV_PAM762_c0_g1_i1	-0.442672	-0.116049	0.133326	0.425395
CBV_PAM23618_c3_g1_i1	0.0761243	-0.382649	-0.169311	0.475836
CBV_PAM12740_c0_g1_i1	-0.112256	-0.0852238	-0.329584	0.527064
CBV_PAM26070_c0_g1_i1	0.065468	-0.410601	-0.121695	0.466828
CBV_PAM1171_c0_g1_i1	-0.162751	-0.19208	-0.19606	0.550891
CBV_PAM1427_c0_g1_i1	-0.2749	-0.240844	-0.00510028	0.520844
CBV_PAM769_c0_g1_i1	-0.450615	-0.0838247	0.106448	0.427992
CBV_PAM65665_c0_g1_i1	-0.297022	-0.0188682	-0.206628	0.522518
CBV_PAM11180_c0_g1_i1	-0.280616	-0.26683	0.0453262	0.50212
CBV_PAM900_c0_g1_i1	-0.397135	-0.223983	0.27445	0.346668
CBV_PAM64147_c1_g1_i1	-0.298549	0.165907	-0.306344	0.438986
CBV_PAM10975_c0_g1_i1	-0.251115	-0.182697	-0.108184	0.541996
CBV_PAM39046_c0_g1_i1	-0.246588	0.146079	-0.346281	0.446789
CBV_PAM64941_c0_g1_i1	0.00624378	-0.409605	-0.0730607	0.476422
CBV_PAM37412_c1_g1_i1	-0.228527	-0.0929988	-0.218024	0.53955
CBV_PAM38629_c0_g1_i1	-0.220401	0.0860044	-0.341766	0.476162
CBV_PAMKOG5_c0_g1_i1	-0.407538	-0.0832634	0.016495	0.474306
CBV_PAM64452_c2_g1_i1	0.0502279	-0.326539	-0.215551	0.491862
CBV_PAM28688_c0_g1_i1	-0.0688034	-0.155499	-0.302115	0.526417
CBV_PAM25524_c0_g1_i1	-0.410033	-0.112143	0.0618769	0.460299
CBV_PAM51276_c0_g1_i1	-0.169269	-0.286447	-0.071954	0.52767
CBV_PAM64205_c0_g1_i1	-0.417251	-0.0713694	0.0261839	0.462436
CBV_PAM912_c1_g1_i1	-0.0800293	-0.118299	-0.321017	0.519345
CBV_PAM11664_c0_g1_i1	0.115299	-0.489316	-0.000172831	0.37419
CBV_PAM53970_c0_g1_i1	-0.311499	0.00476721	-0.198887	0.505618
CBV_PAM37177_c0_g2_i1	-0.012205	-0.237829	-0.264932	0.514966
CBV_PAM24309_c0_g1_i1	-0.108759	0.0534343	-0.405492	0.460817
CBV_PAM51024_c0_g1_i1	-0.288647	-0.176622	-0.0571468	0.522416
CBV_PAM825_c0_g1_i1	-0.266655	-0.140185	-0.125162	0.532003
CBV_PAM64687_c0_g1_i1	-0.161861	-0.338439	0.00162508	0.498675
CBV_PAM23982_c0_g1_i1	-0.203816	-0.0323508	-0.280643	0.51681
CBV_PAM2524_c1_g1_i1	-0.227121	-0.374727	0.219259	0.382589
CBV_PAM23815_c0_g1_i1	-0.101426	-0.198999	-0.231462	0.531887
CBV_PAM38964_c0_g1_i1	0.0107017	-0.340035	-0.164238	0.493572
CBV_PAM1117_c0_g1_i1	0.0438973	-0.200657	-0.328655	0.485415
CBV_PAM29029_c0_g1_i1	0.209667	-0.366198	-0.233478	0.390009
CBV_PAM3923_c0_g1_i1	-0.0980222	-0.179527	-0.250872	0.528421
CBV_PAM37302_c0_g1_i1	-0.187485	0.119668	-0.373471	0.441289
CBV_PAM316_c0_g7_i1	-0.204033	-0.287312	-0.0175144	0.508859
CBV_PAM11263_c0_g1_i1	-0.169414	-0.00614165	-0.323784	0.49934
CBV_PAM27355_c0_g1_i1	-0.404951	-0.039053	-0.0205154	0.46452
CBV_PAM11674_c0_g1_i1	-0.299306	0.106719	-0.265133	0.457721
CBV_PAM24066_c0_g1_i1	0.16049	-0.36795	-0.210937	0.418398
CBV_PAM37230_c0_g1_i1	-0.413878	-0.0972471	0.0698238	0.441301
CBV_PAM27058_c0_g1_i1	-0.179148	-0.17826	-0.176323	0.533731
CBV_PAM37275_c1_g1_i1	-0.40662	-0.0617837	0.00991754	0.458486
CBV_PAM23589_c2_g1_i1	-0.425747	-0.0429422	0.0265963	0.442093
CBV_PAM27379_c0_g1_i1	-0.403591	0.0627732	-0.106898	0.447716
CBV_PAM5354_c0_g1_i1	0.150954	-0.427931	-0.119954	0.396931
CBV_PAM51417_c0_g1_i1	0.0218406	-0.315005	-0.196296	0.48946
CBV_PAM53339_c0_g1_i1	-0.259296	-0.0682781	-0.190899	0.518474
CBV_PAM23612_c3_g1_i1	0.0364958	-0.411708	-0.0723462	0.447559
CBV_PAM24987_c0_g1_i1	-0.423924	-0.0941967	0.0955182	0.422602
CBV_PAM24675_c0_g1_i1	0.123265	-0.448457	-0.0681421	0.393334
CBV_PAM51811_c0_g1_i1	-0.156149	-0.406658	0.164077	0.398731
CBV_PAM10265_c0_g1_i1	-0.290649	-0.0958606	-0.128352	0.514861
CBV_PAM64187_c3_g1_i1	-0.0200766	-0.40112	-0.0392675	0.460464
CBV_PAM3879_c1_g1_i1	-0.185341	-0.081566	-0.25271	0.519617
CBV_PAM1239_c0_g1_i1	-0.325245	-0.275711	0.375254	0.225702
CBV_PAM24080_c0_g1_i1	-0.440161	0.0681186	-0.0434342	0.415476
CBV_PAM37664_c0_g3_i1	0.0341044	-0.258157	-0.261916	0.485968
CBV_PAM41166_c0_g1_i1	0.0290076	-0.277743	-0.238275	0.487011
CBV_PAM24521_c0_g1_i1	-0.403348	-0.0982294	0.0590614	0.442516
CBV_PAM66419_c0_g1_i1	-0.225462	-0.29589	0.0408556	0.480497
CBV_PAM37235_c0_g1_i1	-0.291965	-0.0600857	-0.155376	0.507426
CBV_PAM37389_c0_g1_i1	-0.146289	-0.348104	0.0178877	0.476505
CBV_PAM66385_c0_g1_i1	-0.254083	-0.170789	-0.0921836	0.517056
CBV_PAM25025_c0_g1_i1	0.0326246	-0.412173	-0.0613734	0.440922
CBV_PAM64145_c0_g1_i1	-0.423765	-0.119388	0.153907	0.389246
CBV_PAM50856_c1_g1_i1	-0.218583	-0.0548092	-0.237724	0.511117
CBV_PAM37320_c2_g1_i1	-0.318416	-0.0545123	-0.125357	0.498284
CBV_PAM64842_c1_g1_i1	-0.0382665	-0.21873	-0.249566	0.506563
CBV_PAM37231_c0_g1_i1	-0.068722	-0.326631	-0.10068	0.496033
CBV_PAM1983_c0_g1_i1	0.145618	-0.390991	-0.16199	0.407363
CBV_PAM24364_c0_g1_i1	-0.0677718	-0.357843	-0.0545852	0.4802
CBV_PAM25748_c0_g1_i1	-0.181269	-0.20115	-0.140183	0.522602
CBV_PAM68913_c0_g1_i1	-0.407105	-0.0701475	0.0367634	0.440489
CBV_PAM37668_c0_g1_i1	-0.0609668	-0.222413	-0.226544	0.509923
CBV_PAM2655_c0_g1_i1	-0.304929	-0.132302	-0.0623033	0.499534
CBV_PAM51261_c0_g1_i1	-0.445629	0.00325053	0.0377722	0.404606
CBV_PAM24508_c0_g1_i1	-0.191545	-0.266672	-0.044937	0.503154
CBV_PAM24343_c0_g1_i1	-0.313114	0.0168212	-0.183138	0.479431
CBV_PAM52744_c0_g1_i1	0.101835	-0.30375	-0.242921	0.444836
CBV_PAM10429_c0_g1_i1	0.0595477	-0.214126	-0.307126	0.461705
CBV_PAM10226_c0_g4_i1	-0.014803	-0.206685	-0.269406	0.490893
CBV_PAM10238_c2_g1_i1	-0.32495	-0.040365	-0.118707	0.484022
CBV_PAM23747_c0_g1_i1	-0.288181	-0.174298	-0.0285288	0.491008
CBV_PAM64765_c0_g1_i1	-0.11091	-0.291792	-0.0950916	0.497793
CBV_PAM523_c0_g1_i1	-0.049265	-0.38206	-0.0213178	0.452643
CBV_PAM50831_c2_g2_i1	-0.112288	-0.164029	-0.233171	0.509487
CBV_PAM23739_c0_g2_i1	-0.440893	-0.0796394	0.168031	0.352501
CBV_PAM50852_c0_g1_i1	-0.298248	-0.143301	-0.0483388	0.489888
CBV_PAM1871_c1_g3_i1	-0.329059	-0.138524	-0.00501124	0.472594
CBV_PAM50832_c0_g1_i1	-0.388689	-0.0107687	-0.0403445	0.439802
CBV_PAM24530_c0_g1_i1	-0.34297	-0.076895	-0.048761	0.468626
CBV_PAM52636_c1_g1_i1	-0.421067	-0.102855	0.161313	0.362609
CBV_PAM50873_c0_g1_i1	-0.439379	0.125433	-0.0506745	0.364621
CBV_PAM51289_c0_g1_i1	-0.386745	-0.15196	0.154998	0.383706
CBV_PAM791_c0_g1_i1	0.0416932	0.0170884	-0.441525	0.382744
CBV_PAM50664_c0_g1_i1	-0.100576	-0.297575	-0.0880147	0.486165
CBV_PAM23692_c0_g1_i1	-0.191228	-0.196309	-0.115906	0.503443
CBV_PAM2191_c0_g1_i1	-0.0888731	-0.240211	-0.16867	0.497753
CBV_PAM67280_c0_g1_i1	-0.401473	0.0493955	-0.0649652	0.417043
CBV_PAM64416_c0_g1_i1	-0.365638	-0.0835529	0.00149046	0.447701
CBV_PAM10197_c0_g1_i1	-0.173342	-0.0041587	-0.295134	0.472634
CBV_PAM37279_c1_g1_i1	-0.37995	0.0650669	-0.109199	0.424082
CBV_PAM51142_c0_g1_i1	-0.221846	-0.0542701	-0.215228	0.491344
CBV_PAM10497_c0_g1_i1	-0.222673	-0.180855	-0.0950434	0.498571
CBV_PAM37606_c0_g1_i1	0.035	-0.336922	-0.148394	0.450316
CBV_PAM65643_c0_g1_i1	0.0293889	-0.316811	-0.170078	0.457501
CBV_PAM64327_c0_g1_i1	-0.282839	-0.154103	-0.0453226	0.482265
CBV_PAM10505_c0_g1_i1	-0.0956026	-0.307471	-0.0749616	0.478035
CBV_PAM11341_c0_g1_i1	-0.218499	-0.210852	-0.0608812	0.490232
CBV_PAM1537_c0_g1_i1	0.0560032	-0.296574	-0.208198	0.448769
CBV_PAM65753_c0_g1_i1	-0.368997	-0.148267	0.111584	0.40568
CBV_PAM51369_c0_g1_i1	-0.367203	-0.0874018	0.0162742	0.43833
CBV_PAM53260_c0_g1_i1	0.0874898	-0.216407	-0.304345	0.433263
CBV_PAM10247_c0_g1_i1	-0.392812	-0.040283	0.0103086	0.422786
CBV_PAM52066_c1_g1_i1	0.0243982	-0.128821	-0.342211	0.446634
CBV_PAM24062_c0_g1_i1	0.158406	-0.391927	-0.135948	0.369469
CBV_PAM27659_c0_g1_i1	-0.346483	-0.0266427	-0.0809097	0.454035
CBV_PAM24767_c0_g1_i1	-0.388072	-0.155494	0.200346	0.34322
CBV_PAM64439_c0_g1_i1	-0.449843	-0.0160651	0.129427	0.336481
CBV_PAM727_c1_g1_i1	0.174812	-0.439947	-0.0586403	0.323775
CBV_PAM23618_c0_g1_i1	-0.422576	0.144	-0.0767652	0.355342
CBV_PAM10522_c1_g1_i1	-0.365961	-0.189679	0.220794	0.334845
CBV_PAM24261_c0_g1_i1	0.191895	-0.333736	-0.222517	0.364357
CBV_PAM54373_c0_g1_i1	-0.294241	-0.245257	0.131807	0.407691
CBV_PAM23636_c0_g1_i1	-0.295698	-0.0676541	-0.110561	0.473913
CBV_PAM10286_c0_g1_i1	-0.0795209	-0.254839	-0.150211	0.484572
CBV_PAM50988_c0_g1_i1	-0.397245	-0.0379392	0.0243508	0.410834
CBV_PAM50879_c0_g1_i1	0.121579	-0.380483	-0.130633	0.389536
CBV_PAM65245_c0_g1_i1	0.150163	-0.251762	-0.292921	0.394521
CBV_PAM65785_c0_g1_i1	-0.409392	-0.0129276	0.0239663	0.398353
CBV_PAM38830_c0_g1_i1	-0.322793	-0.0550877	-0.0832257	0.461106
CBV_PAM64982_c1_g1_i1	-0.284097	-0.0890846	-0.102555	0.475737
CBV_PAM26199_c0_g1_i1	0.0224461	-0.429128	0.0329668	0.373715
CBV_PAM553_c0_g1_i1	-0.107152	-0.317263	-0.0353792	0.459795
CBV_PAM10808_c0_g1_i1	-0.398976	0.0511246	-0.0515059	0.399358
CBV_PAM38496_c0_g1_i1	-0.405278	-0.0413451	0.0534101	0.393213
CBV_PAM23798_c0_g1_i1	-0.404071	-0.0679423	0.0874505	0.384562
CBV_PAM64406_c1_g1_i1	-0.248173	-0.218921	0.00463773	0.462457
CBV_PAM39799_c0_g1_i1	-0.402464	-0.0347647	0.039722	0.397507
CBV_PAM37603_c0_g1_i1	0.0541518	-0.360425	-0.113796	0.420069
CBV_PAM14659_c0_g1_i1	-0.328323	0.0123056	-0.127877	0.443894
CBV_PAM37499_c0_g1_i1	-0.258816	-0.220161	0.0261587	0.452818
CBV_PAM64231_c0_g1_i1	-0.335597	-0.110296	0.00322969	0.442664
CBV_PAM11932_c0_g1_i1	-0.360672	-0.127956	0.0788675	0.409761
CBV_PAM64333_c0_g1_i1	-0.378807	-0.16693	0.276384	0.269352
CBV_PAM64540_c0_g1_i1	-0.14447	-0.257248	-0.0748099	0.476528
CBV_PAM2358_c0_g1_i1	0.205845	-0.369137	-0.170015	0.333306
CBV_PAM64922_c0_g1_i1	-0.361115	-0.0831489	0.0196923	0.424572
CBV_PAM51152_c0_g1_i1	-0.232958	-0.0335608	-0.202851	0.469369
CBV_PAM51346_c0_g1_i1	-0.320066	-0.15279	0.0378218	0.435034
CBV_PAM1670_c0_g1_i1	-0.345662	-0.0320174	-0.0600473	0.437727
CBV_PAM37183_c0_g1_i1	-0.378961	0.108685	-0.112623	0.382899
CBV_PAM50864_c0_g1_i1	-0.316368	-0.109384	-0.0230858	0.448838
CBV_PAM51915_c0_g1_i1	-0.416753	-0.0284647	0.081357	0.363861
CBV_PAM37232_c1_g1_i1	-0.0147188	0.0781117	-0.421502	0.358109
CBV_PAM51067_c1_g1_i1	-0.382642	0.00157096	-0.0252744	0.406346
CBV_PAM1054_c0_g1_i1	-0.331092	0.0669705	-0.15356	0.417681
CBV_PAM10210_c1_g1_i1	0.00401308	-0.317163	-0.128434	0.441584
CBV_PAM38179_c0_g1_i1	0.0219334	-0.314246	-0.144987	0.4373
CBV_PAM10664_c0_g1_i1	-0.338198	0.068992	-0.143821	0.413027
CBV_PAM51014_c0_g1_i1	-0.375625	-0.0359543	0.00174429	0.409835
CBV_PAM38926_c0_g1_i1	-0.0608292	0.0320636	-0.376016	0.404781
CBV_PAM23736_c0_g1_i1	0.125674	-0.159924	-0.348841	0.383091
CBV_PAM51910_c0_g1_i1	-0.253326	-0.217084	0.025637	0.444773
CBV_PAM24136_c1_g1_i1	-0.299527	-0.0224303	-0.128275	0.450232
CBV_PAM50880_c0_g1_i1	-0.35561	-0.187541	0.281972	0.261179
CBV_PAM51947_c0_g1_i1	0.1033	-0.180719	-0.323924	0.401344
CBV_PAM10525_c0_g1_i1	-0.172727	-0.265935	-0.0168623	0.455524
CBV_PAM38080_c0_g1_i1	-0.416851	0.0319283	0.0200225	0.3649
CBV_PAM23622_c0_g1_i1	0.0777165	-0.331858	-0.155219	0.40936
CBV_PAM976_c0_g1_i1	0.0580579	-0.330241	-0.14438	0.416563
CBV_PAM10858_c1_g1_i1	-0.0264986	-0.193196	-0.239444	0.459138
CBV_PAM37247_c1_g1_i1	0.0150103	-0.290297	-0.163652	0.438938
CBV_PAM68067_c0_g1_i1	-0.266358	-0.107504	-0.0883437	0.462206
CBV_PAM64261_c0_g1_i1	-0.194241	0.13055	-0.319372	0.383063
CBV_PAM815_c0_g1_i1	0.0131428	-0.361353	-0.0613318	0.409542
CBV_PAM65009_c0_g1_i1	-0.220031	-0.13905	-0.111534	0.470615
CBV_PAM10200_c1_g1_i1	-0.367771	-0.00487416	-0.0330672	0.405712
CBV_PAM51367_c0_g1_i1	-0.368527	-0.0765388	0.0490859	0.39598
CBV_PAM50813_c0_g1_i1	-0.306141	-0.0672468	-0.0703888	0.443776
CBV_PAM24255_c0_g1_i1	0.11918	-0.339075	-0.160316	0.380212
CBV_PAM10193_c0_g1_i1	-0.146511	-0.254767	-0.0564523	0.457731
CBV_PAM25546_c0_g1_i1	-0.412581	-0.0318727	0.104653	0.339801
CBV_PAM11660_c0_g1_i1	-0.321107	-0.00120089	-0.105773	0.428081
CBV_PAM64366_c1_g1_i1	0.0654966	-0.326433	-0.145517	0.406454
CBV_PAM64694_c1_g1_i1	-0.293848	-0.0638449	-0.0883466	0.44604
CBV_PAM50846_c0_g1_i1	-0.361366	-0.0587238	0.0181103	0.401979
CBV_PAM56594_c0_g1_i1	-0.00929846	-0.346428	-0.0588152	0.414542
CBV_PAM50724_c0_g1_i1	0.0894795	-0.105386	-0.363565	0.379472
CBV_PAM64586_c0_g1_i1	-0.168433	-0.192648	-0.105669	0.46675
CBV_PAM64183_c1_g4_i1	0.00374512	-0.194518	-0.249903	0.440677
CBV_PAM794_c0_g1_i1	-0.0318275	-0.211004	-0.209428	0.45226
CBV_PAM37303_c0_g1_i1	-0.270327	-0.104284	-0.0755641	0.450175
CBV_PAM13470_c0_g1_i1	-0.0734604	-0.263423	-0.11497	0.451853
CBV_PAM906_c0_g1_i1	-0.233655	-0.132461	-0.0933534	0.45947
CBV_PAM23813_c0_g1_i1	-0.365532	-0.107109	0.105807	0.366834
CBV_PAM64169_c0_g1_i1	-0.235727	-0.274657	0.134956	0.375428
CBV_PAM12330_c0_g1_i1	-0.387841	0.0711696	-0.0465806	0.363252
CBV_PAM50848_c0_g1_i1	0.203102	-0.390923	-0.102808	0.290629
CBV_PAM51727_c0_g1_i1	-0.168725	-0.206946	-0.0834504	0.459121
CBV_PAM64243_c0_g1_i1	-0.371824	-0.0287519	0.0137102	0.386865
CBV_PAM65921_c0_g1_i1	-0.00792925	-0.292724	-0.129583	0.430236
CBV_PAM681_c0_g1_i1	-0.122342	-0.24288	-0.0881171	0.45334
CBV_PAM10715_c0_g1_i1	-0.37205	-0.0905577	0.110238	0.35237
CBV_PAM24695_c0_g1_i1	-0.0628108	-0.298509	-0.0678881	0.429208
CBV_PAM51491_c0_g1_i1	-0.30739	-0.146765	0.0502693	0.403886
CBV_PAM52434_c0_g1_i1	-0.377775	0.0611799	-0.0475783	0.364173
CBV_PAM37792_c0_g1_i1	-0.341646	-0.0669757	0.00921687	0.399405
CBV_PAM10444_c0_g1_i1	-0.334253	-0.0608976	-0.00786466	0.403015
CBV_PAM10542_c0_g1_i1	0.0346385	-0.322469	-0.111805	0.399635
CBV_PAM10506_c0_g1_i1	-0.250615	-0.0235833	-0.159737	0.433935
CBV_PAM51960_c0_g1_i1	-0.351641	-0.135485	0.152933	0.334192
CBV_PAM1463_c1_g1_i1	-0.351407	-0.0191788	-0.0190321	0.389618
CBV_PAM64756_c0_g1_i1	0.16001	-0.264211	-0.24358	0.347782
CBV_PAM1809_c0_g1_i1	-0.366642	-0.10577	0.145994	0.326417
CBV_PAM37242_c0_g3_i1	-0.0563349	-0.0244657	-0.324412	0.405213
CBV_PAM37196_c0_g1_i1	-0.358566	-0.0896412	0.0919852	0.356222
CBV_PAM64372_c0_g1_i1	-0.223998	-0.187211	-0.019989	0.431198
CBV_PAM51296_c0_g1_i1	-0.213865	-0.178644	-0.0449313	0.437441
CBV_PAM24063_c0_g1_i1	-0.306677	-0.099777	-0.000465193	0.406919
CBV_PAM51066_c0_g1_i1	0.0967712	-0.381926	-0.0492192	0.334374
CBV_PAM39777_c0_g1_i1	-0.10511	-0.237423	-0.0955011	0.438034
CBV_PAM64681_c1_g1_i1	0.0806186	-0.265846	-0.201974	0.387202
CBV_PAM38147_c0_g1_i1	-0.381536	-0.0678942	0.135308	0.314122
CBV_PAM12091_c0_g1_i1	-0.334149	-0.129518	0.107019	0.356647
CBV_PAM37697_c1_g1_i1	-0.329664	-0.147955	0.13367	0.343949
CBV_PAM64321_c0_g1_i1	-0.294135	0.0490249	-0.148865	0.393975
CBV_PAM11786_c0_g1_i1	-0.330416	0.0666317	-0.110759	0.374543
CBV_PAM37173_c1_g1_i1	-0.194267	-0.202252	-0.0349405	0.43146
CBV_PAM26385_c1_g1_i1	-0.241719	-0.170556	-0.00955108	0.421827
CBV_PAM23947_c0_g1_i1	-0.138046	-0.210738	-0.0904215	0.439205
CBV_PAM1413_c0_g1_i1	-0.32275	-0.0226942	-0.0507765	0.396221
CBV_PAM10637_c0_g1_i1	-0.310824	-0.0348713	-0.057887	0.403583
CBV_PAM51828_c0_g1_i1	-0.349342	-0.0984653	0.0987756	0.349031
CBV_PAM23606_c0_g1_i1	-0.194146	-0.220502	-0.00371642	0.418364
CBV_PAM64168_c0_g1_i1	-0.0925572	-0.291214	-0.0236602	0.407432
CBV_PAM1074_c0_g1_i1	-0.0983513	-0.233299	-0.0994816	0.431132
CBV_PAM992_c1_g1_i1	0.0256861	-0.345086	-0.0513814	0.370781
CBV_PAM900_c1_g1_i1	-0.299794	-0.108758	0.0114273	0.397126
CBV_PAM23653_c0_g1_i1	-0.0947161	-0.271922	-0.0499614	0.416599
CBV_PAM10616_c0_g1_i1	0.0675175	-0.360898	-0.0537897	0.34717
CBV_PAM23605_c0_g1_i1	0.0742807	-0.302627	-0.145643	0.373989
CBV_PAM25027_c0_g1_i1	-0.119382	-0.193752	-0.123496	0.43663
CBV_PAM11721_c0_g1_i1	-0.303196	0.00952774	-0.100468	0.394137
CBV_PAM37409_c0_g1_i1	0.122832	-0.348248	-0.105483	0.330899
CBV_PAM38009_c0_g1_i1	0.0824037	-0.295275	-0.157948	0.370819
CBV_PAM50897_c0_g1_i1	-0.374471	-0.079445	0.17081	0.283106
CBV_PAM10504_c0_g1_i1	0.076336	-0.323502	-0.116013	0.36318
CBV_PAM10664_c1_g1_i1	0.00920518	-0.261974	-0.151784	0.404553
CBV_PAM24459_c0_g1_i1	-0.319297	-0.0667706	0.000748128	0.385319
CBV_PAM13598_c0_g1_i1	-0.344736	-0.0810756	0.073691	0.35212
CBV_PAM24321_c0_g1_i1	-0.162435	-0.231907	-0.0222163	0.416559
CBV_PAM23657_c0_g1_i1	-0.0873122	-0.305816	0.00199271	0.391135
CBV_PAM10937_c0_g1_i1	-0.366508	0.0233584	0.00145024	0.3417
CBV_PAM23633_c0_g1_i1	0.0935826	-0.310276	-0.138911	0.355604
CBV_PAM64240_c0_g2_i1	-0.265054	-0.084962	-0.0594314	0.409447
CBV_PAM24076_c0_g1_i1	-0.194064	-0.208646	-0.0056577	0.408367
CBV_PAM781_c0_g1_i1	0.175723	-0.278775	-0.206272	0.309324
CBV_PAM37549_c2_g1_i1	-0.346669	0.0110204	-0.0190539	0.354702
CBV_PAM51368_c0_g1_i1	-0.0883809	-0.241881	-0.0852499	0.415512
CBV_PAM50853_c0_g2_i1	-0.127173	-0.178317	-0.122227	0.427717
CBV_PAM37189_c1_g1_i1	-0.172481	-0.250008	0.0320545	0.390434
CBV_PAM24064_c1_g1_i1	-0.366695	-0.0353867	0.081043	0.321039
CBV_PAM51028_c0_g1_i1	-0.259051	-0.0495726	-0.0986672	0.407291
CBV_PAM64327_c1_g1_i1	0.0363566	-0.298705	-0.112398	0.374747
CBV_PAM1528_c0_g1_i1	-0.0158586	-0.276757	-0.102484	0.395099
CBV_PAM65929_c0_g1_i1	-0.121023	-0.184883	-0.118118	0.424024
CBV_PAM37372_c0_g1_i1	-0.217451	-0.14602	-0.0492652	0.412736
CBV_PAM64587_c0_g1_i1	0.0203679	-0.324605	-0.0591624	0.363399
CBV_PAM24035_c0_g1_i1	-0.0790843	-0.0281505	-0.283934	0.391169
CBV_PAM37740_c0_g1_i1	-0.0111933	-0.369362	0.0652806	0.315275
CBV_PAM26105_c0_g1_i1	-0.0237674	-0.288664	-0.0748301	0.387262
CBV_PAM64195_c0_g1_i1	0.0575381	-0.066177	-0.335461	0.344099
CBV_PAM10194_c0_g1_i1	0.0950894	-0.24492	-0.205911	0.355742
CBV_PAM10382_c0_g1_i1	-0.326163	-0.0483312	0.0157602	0.358734
CBV_PAM38081_c0_g1_i1	-0.347365	0.00642122	0.00338006	0.337564
CBV_PAM10270_c0_g1_i1	-0.265895	-0.141175	0.0306345	0.376435
CBV_PAM37841_c0_g1_i1	-0.0825448	-0.2495	-0.0669056	0.39895
CBV_PAM40686_c0_g1_i1	-0.0398971	-0.355873	0.0855735	0.310197
CBV_PAM53127_c0_g1_i1	-0.0698192	-0.29051	-0.0148821	0.375212
CBV_PAM37176_c0_g1_i1	0.0596008	-0.0221443	-0.353361	0.315905
CBV_PAM50938_c0_g1_i1	0.150002	-0.354073	-0.0692586	0.27333
CBV_PAM751_c0_g1_i1	0.124153	-0.351771	-0.0601167	0.287735
CBV_PAM37766_c0_g1_i1	-0.29873	-0.0576744	-0.00217055	0.358575
CBV_PAM37901_c0_g1_i1	-0.243814	-0.0933941	-0.0470164	0.384225
CBV_PAM64583_c0_g1_i1	-0.0690708	-0.169983	-0.159385	0.398439
CBV_PAM24923_c0_g1_i1	-0.0791932	-0.26961	-0.022863	0.371666
CBV_PAM64355_c0_g1_i1	0.0176343	-0.337279	0.000655783	0.318989
CBV_PAM50861_c0_g1_i1	0.0151985	-0.240264	-0.142947	0.368012
CBV_PAM801_c0_g1_i1	-0.0620323	-0.250528	-0.0641563	0.376717
CBV_PAM65517_c0_g1_i1	-0.255106	-0.0848034	-0.0287458	0.368655
CBV_PAM23834_c0_g1_i1	-0.0199368	-0.307634	-0.00323223	0.330803
CBV_PAM814_c0_g1_i1	-0.0046142	-0.363664	0.145472	0.222807
CBV_PAM24895_c0_g1_i1	-0.264507	-0.0921175	0.00383675	0.352788
CBV_PAM37767_c0_g1_i1	0.0229329	-0.350735	0.0509383	0.276864
CBV_PAM23744_c0_g1_i1	-0.266251	-0.0883935	0.00462456	0.350019
CBV_PAM50773_c0_g1_i1	0.114804	-0.344656	-0.0227106	0.252563
CBV_PAM686_c0_g1_i1	-0.0456214	-0.241532	-0.0605632	0.347717

## Sheet: Subcluster7
Additional file 6. Expression subcluster matrix. Values of Trinity gene expression (TPM-TMM) for 15 subclusters identified by gene expression cluster analysis during fruit developmental stages (150, 240, 300 and 390 days after fruit set; DAFS) in Persea americana cv. Hass.
Trinity genes	150-DAFS	240-DAFS	300-DAFS	390-DAFS
CBV_PAM38818_c0_g2_i1	1.43992	1.29826	-0.0513754	-2.6868
CBV_PAM52297_c0_g1_i1	1.24237	0.535778	1.03323	-2.81138
CBV_PAM11001_c0_g2_i1	0.934245	1.97571	-1.64531	-1.26464
CBV_PAM66344_c0_g2_i1	1.71902	0.903625	-0.492266	-2.13038
CBV_PAM1597_c1_g1_i1	1.47554	0.965436	-0.329028	-2.11195
CBV_PAM38048_c0_g1_i1	1.64603	0.86535	-0.737471	-1.77391
CBV_PAM12489_c0_g1_i1	1.62235	0.653416	-0.41599	-1.85978
CBV_PAM43871_c0_g1_i1	1.01577	1.48189	-0.927629	-1.57003
CBV_PAM1881_c0_g1_i1	0.493293	1.01035	0.652504	-2.15615
CBV_PAM11419_c0_g1_i1	1.51748	-0.182525	0.571192	-1.90614
CBV_PAM41171_c0_g1_i1	1.6993	0.47565	-0.495667	-1.67928
CBV_PAM37547_c0_g1_i1	1.56067	0.322904	-0.00746608	-1.87611
CBV_PAM1232_c0_g1_i1	1.51213	0.834678	-0.796504	-1.5503
CBV_PAM5713_c0_g1_i1	0.862786	0.899622	0.323661	-2.08607
CBV_PAM12339_c1_g1_i1	1.52406	0.160566	0.16493	-1.84955
CBV_PAM51147_c0_g1_i1	1.35296	0.412846	0.136354	-1.90216
CBV_PAM25861_c0_g1_i1	1.63334	0.150947	-0.0776304	-1.70665
CBV_PAM51593_c1_g1_i1	1.36832	0.338844	0.177549	-1.88472
CBV_PAM46997_c0_g1_i1	1.57302	0.694592	-1.15736	-1.11026
CBV_PAM15347_c0_g1_i1	1.59032	0.563913	-0.667445	-1.48679
CBV_PAM1432_c0_g1_i1	1.61374	0.274554	-0.234039	-1.65426
CBV_PAM38049_c0_g1_i1	0.313195	1.17236	0.427113	-1.91266
CBV_PAM11092_c0_g1_i1	1.63938	0.411919	-0.607913	-1.44338
CBV_PAM17119_c0_g1_i1	1.55556	0.504537	-0.531258	-1.52884
CBV_PAM12823_c0_g1_i1	1.30932	0.938182	-0.857151	-1.39035
CBV_PAM39512_c0_g1_i1	1.06576	0.58904	0.246949	-1.90175
CBV_PAM26027_c0_g1_i1	1.61466	0.311295	-0.4459	-1.48005
CBV_PAM55044_c0_g1_i1	1.58643	0.428877	-0.604734	-1.41058
CBV_PAM9067_c0_g1_i1	1.29017	0.75688	-0.42529	-1.62176
CBV_PAM24270_c0_g1_i1	1.53601	0.410236	-0.440137	-1.50611
CBV_PAM11824_c0_g3_i1	1.56149	0.507788	-0.769301	-1.29998
CBV_PAM3268_c0_g4_i1	1.17936	0.385573	0.264008	-1.82895
CBV_PAM52108_c0_g1_i1	1.17827	0.494856	0.139052	-1.81218
CBV_PAM63107_c0_g1_i1	1.44146	0.524055	-0.41552	-1.54999
CBV_PAM42921_c0_g1_i1	1.57331	0.0674899	-0.0886186	-1.55218
CBV_PAM7595_c1_g1_i1	1.54929	0.51817	-0.917264	-1.1502
CBV_PAM66862_c0_g1_i1	1.39011	0.671907	-0.658753	-1.40327
CBV_PAM11012_c0_g1_i1	1.42577	0.392958	-0.222751	-1.59597
CBV_PAM10757_c1_g1_i1	1.07654	0.560102	0.157275	-1.79392
CBV_PAM24090_c0_g1_i1	1.56381	0.418367	-0.736791	-1.24539
CBV_PAM38418_c0_g1_i1	1.55111	0.370555	-0.564002	-1.35767
CBV_PAM52053_c0_g1_i1	1.61197	0.324491	-0.770482	-1.16598
CBV_PAM4678_c0_g1_i1	1.57668	0.401739	-0.836278	-1.14214
CBV_PAM26986_c0_g1_i1	1.59675	0.296954	-0.626049	-1.26765
CBV_PAM24460_c1_g1_i1	1.35775	-0.1122	0.356267	-1.60181
CBV_PAM40790_c0_g1_i1	0.669452	0.748489	0.4018	-1.81974
CBV_PAM27750_c0_g1_i1	1.40075	0.105026	0.0713894	-1.57717
CBV_PAM66012_c0_g1_i1	1.30424	0.731351	-0.743473	-1.29212
CBV_PAM52385_c0_g1_i1	1.11373	0.61021	-0.0388298	-1.68511
CBV_PAM54592_c0_g1_i1	1.42348	0.141724	-0.0280074	-1.53719
CBV_PAM13293_c0_g1_i1	1.5794	0.171073	-0.459203	-1.29127
CBV_PAM39490_c0_g1_i1	0.853361	1.12102	-0.51412	-1.46026
CBV_PAM25422_c0_g4_i1	1.45819	0.0314456	0.00162283	-1.49126
CBV_PAM27810_c0_g1_i1	1.55595	0.193348	-0.46069	-1.28861
CBV_PAM1361_c0_g1_i1	1.49284	0.116264	-0.176116	-1.43298
CBV_PAM65112_c0_g1_i1	1.17702	0.137831	0.344212	-1.65907
CBV_PAM58206_c0_g1_i1	1.38896	0.456283	-0.457573	-1.38767
CBV_PAM42483_c0_g1_i1	1.35471	0.604866	-0.705316	-1.25426
CBV_PAM24608_c0_g1_i1	1.36198	0.442432	-0.367374	-1.43704
CBV_PAM14760_c0_g1_i1	1.04646	0.969914	-0.771479	-1.2449
CBV_PAM66223_c0_g1_i1	0.43659	0.960091	0.322918	-1.7196
CBV_PAM52269_c0_g1_i1	1.31012	0.302205	-0.0769151	-1.53541
CBV_PAM4888_c0_g1_i1	1.51101	0.238889	-0.491584	-1.25831
CBV_PAM67061_c0_g2_i1	1.51439	0.300238	-0.650971	-1.16366
CBV_PAM57014_c0_g1_i1	1.13148	0.598064	-0.155001	-1.57454
CBV_PAM57482_c0_g1_i1	1.31011	0.654062	-0.813691	-1.15048
CBV_PAM5127_c0_g1_i1	1.19741	0.605145	-0.314404	-1.48815
CBV_PAM39219_c0_g1_i1	1.37134	0.196809	-0.0896943	-1.47845
CBV_PAM39231_c0_g1_i1	1.29394	0.677781	-0.860023	-1.1117
CBV_PAM10884_c0_g1_i1	1.44276	0.42924	-0.730038	-1.14196
CBV_PAM65045_c0_g1_i1	1.42242	0.375878	-0.507343	-1.29096
CBV_PAM1581_c2_g1_i1	1.40832	0.497839	-0.818037	-1.08812
CBV_PAM66225_c0_g1_i1	1.38748	0.384812	-0.419879	-1.35241
CBV_PAM64526_c1_g1_i1	1.03307	0.911102	-0.597599	-1.34657
CBV_PAM13587_c0_g1_i1	1.07253	0.936651	-0.999202	-1.00998
CBV_PAM26841_c0_g1_i1	1.33235	0.59072	-0.781765	-1.1413
CBV_PAM51687_c1_g1_i1	0.965244	0.764589	-0.158123	-1.57171
CBV_PAM5733_c0_g1_i1	0.740231	0.478746	0.501515	-1.72049
CBV_PAM30738_c0_g1_i1	1.0163	0.939404	-0.700166	-1.25554
CBV_PAM69357_c0_g1_i1	1.39989	0.339069	-0.435437	-1.30352
CBV_PAM28625_c0_g1_i1	1.47596	-0.122849	-0.0249733	-1.32813
CBV_PAM1062_c0_g2_i1	1.20184	0.719147	-0.685642	-1.23535
CBV_PAM12340_c0_g1_i1	1.46906	0.09427	-0.249476	-1.31386
CBV_PAM5556_c0_g1_i1	1.24153	0.5633	-0.420465	-1.38437
CBV_PAM68874_c0_g1_i1	1.52598	0.2384	-0.925647	-0.838737
CBV_PAM37798_c0_g1_i1	1.21631	0.641961	-0.533202	-1.32507
CBV_PAM24017_c0_g1_i1	1.47612	0.216635	-0.490831	-1.20192
CBV_PAM718_c0_g5_i1	0.613396	1.04777	-0.10732	-1.55384
CBV_PAM2145_c1_g1_i1	1.21647	0.372695	-0.0835565	-1.50561
CBV_PAM24726_c0_g2_i1	0.845639	0.718824	0.0500417	-1.6145
CBV_PAM64236_c1_g1_i1	1.12173	0.190824	0.254897	-1.56745
CBV_PAM11947_c0_g1_i1	1.00385	0.81718	-0.428699	-1.39233
CBV_PAM67618_c0_g1_i1	0.668787	0.856888	0.0861721	-1.61185
CBV_PAM34037_c0_g1_i1	1.27154	0.462656	-0.399212	-1.33498
CBV_PAM12339_c0_g1_i1	1.41837	-0.0249595	-0.0704273	-1.32298
CBV_PAM46569_c0_g1_i1	1.54634	0.0860012	-0.692273	-0.940067
CBV_PAM40335_c0_g1_i1	1.50895	-0.0994	-0.221831	-1.18772
CBV_PAM23912_c0_g1_i1	1.4636	0.161903	-0.457864	-1.16764
CBV_PAM54199_c1_g1_i1	1.07273	0.781512	-0.57837	-1.27587
CBV_PAM5658_c0_g1_i1	1.46335	0.241626	-0.674734	-1.03024
CBV_PAM24402_c1_g1_i1	0.863441	0.63608	0.0950836	-1.59461
CBV_PAM31428_c0_g1_i1	1.38716	0.298582	-0.477964	-1.20778
CBV_PAM1605_c0_g1_i1	1.30002	0.410561	-0.422681	-1.2879
CBV_PAM24450_c0_g1_i1	1.15831	0.341981	-0.0129903	-1.4873
CBV_PAM38329_c0_g1_i1	1.42	-0.0754805	-0.0640649	-1.28045
CBV_PAM6202_c0_g1_i1	0.949397	0.729733	-0.199763	-1.47937
CBV_PAM38942_c0_g1_i1	0.645174	0.771809	0.195966	-1.61295
CBV_PAM10593_c3_g1_i1	1.34913	0.284237	-0.363285	-1.27008
CBV_PAM8579_c0_g1_i1	1.44505	0.27131	-0.837637	-0.87872
CBV_PAM18691_c0_g1_i1	1.25986	0.517361	-0.575735	-1.20148
CBV_PAM2093_c0_g1_i1	1.42191	0.198036	-0.460766	-1.15918
CBV_PAM68920_c0_g1_i1	1.50107	0.10428	-0.631262	-0.97409
CBV_PAM53198_c0_g1_i1	0.816004	0.913	-0.318797	-1.41021
CBV_PAM53287_c0_g1_i1	0.742397	0.617929	0.248213	-1.60854
CBV_PAM15228_c0_g1_i1	1.06978	0.459498	-0.0378014	-1.49148
CBV_PAM71589_c0_g1_i1	0.745706	1.03125	-0.451662	-1.3253
CBV_PAM53341_c0_g1_i1	1.4085	-0.148614	-0.0106359	-1.24925
CBV_PAM42637_c0_g1_i1	0.816299	0.952961	-0.442585	-1.32668
CBV_PAM24843_c0_g1_i1	1.28461	0.459475	-1.14262	-0.601469
CBV_PAM52435_c0_g1_i1	1.28441	0.499091	-0.752525	-1.03098
CBV_PAM74641_c0_g6_i1	0.986936	0.548076	-0.034709	-1.5003
CBV_PAM58915_c0_g1_i1	1.37556	0.356158	-0.807991	-0.923727
CBV_PAM12829_c0_g1_i1	1.29449	0.361253	-0.410819	-1.24493
CBV_PAM28669_c0_g1_i1	1.22397	0.551661	-0.619515	-1.15611
CBV_PAM1431_c1_g1_i1	1.49514	0.0667373	-0.606198	-0.955679
CBV_PAM39174_c0_g1_i1	0.819578	0.395769	0.38047	-1.59582
CBV_PAM45233_c0_g1_i1	1.40739	0.230034	-0.555643	-1.08179
CBV_PAM37453_c1_g1_i1	0.948597	0.549886	0.0132782	-1.51176
CBV_PAM56406_c0_g1_i1	1.40662	0.229457	-0.578283	-1.05779
CBV_PAM67822_c0_g1_i1	1.38148	0.0151738	-0.154377	-1.24228
CBV_PAM15911_c0_g1_i1	1.35702	0.227355	-0.395975	-1.1884
CBV_PAM55852_c0_g1_i1	1.44091	0.116622	-0.505271	-1.05226
CBV_PAM11355_c1_g1_i1	0.568131	1.06984	-0.251781	-1.3862
CBV_PAM12942_c0_g1_i1	1.26878	0.309816	-0.289755	-1.28884
CBV_PAM6092_c0_g1_i1	1.02496	0.534371	-0.110416	-1.44891
CBV_PAM37624_c0_g1_i1	1.27472	0.296914	-0.286778	-1.28485
CBV_PAM13847_c0_g1_i1	1.1461	0.117185	0.1781	-1.44138
CBV_PAM3035_c0_g1_i1	1.37465	0.271164	-0.582278	-1.06353
CBV_PAM56767_c0_g1_i1	1.48461	0.0249434	-0.563478	-0.946075
CBV_PAM11406_c1_g2_i1	0.795339	0.82863	-0.187886	-1.43608
CBV_PAM57108_c0_g1_i1	1.47079	0.0325596	-0.52247	-0.980876
CBV_PAM51579_c0_g1_i1	1.08415	0.660818	-0.508677	-1.23629
CBV_PAM27917_c0_g1_i1	1.0731	0.297572	0.0928255	-1.4635
CBV_PAM64409_c1_g1_i1	1.41308	0.155392	-0.525711	-1.04276
CBV_PAM41250_c0_g1_i1	1.29135	0.20157	-0.220139	-1.27278
CBV_PAM55285_c0_g1_i1	1.42814	0.18333	-0.805734	-0.805734
CBV_PAM74312_c0_g1_i1	0.824143	0.78266	-0.175975	-1.43083
CBV_PAM64777_c3_g1_i1	0.742601	0.844292	-0.144567	-1.44233
CBV_PAM66551_c0_g1_i1	1.47463	0.00927511	-0.53346	-0.950445
CBV_PAM1105_c0_g1_i1	1.32149	0.12352	-0.198934	-1.24607
CBV_PAM14087_c1_g1_i1	1.03261	0.634852	-0.340352	-1.32711
CBV_PAM40470_c0_g1_i1	0.96082	0.651941	-0.224124	-1.38864
CBV_PAM58828_c0_g1_i1	1.04917	0.660744	-0.454092	-1.25582
CBV_PAM64224_c1_g1_i1	1.35854	0.0854256	-0.265134	-1.17883
CBV_PAM13435_c0_g1_i1	1.28186	0.373197	-1.10846	-0.546594
CBV_PAM4183_c0_g1_i1	1.49422	-0.0332725	-0.697853	-0.763098
CBV_PAM13531_c1_g1_i1	1.45481	0.00722775	-0.501076	-0.960965
CBV_PAM66515_c0_g1_i1	1.22028	0.345073	-0.308274	-1.25708
CBV_PAM873_c0_g1_i1	1.22655	0.31807	-0.282355	-1.26227
CBV_PAM28169_c0_g1_i1	1.46425	-0.0901544	-0.38541	-0.988682
CBV_PAM18675_c0_g1_i1	1.43705	0.0946924	-0.646262	-0.885478
CBV_PAM41430_c0_g1_i1	0.997697	0.766696	-0.622041	-1.14235
CBV_PAM25422_c0_g1_i1	1.03531	0.107767	0.303893	-1.44697
CBV_PAM38893_c0_g1_i1	0.76534	0.624912	0.118219	-1.50847
CBV_PAM11824_c0_g6_i1	1.05943	0.0814945	0.291354	-1.43228
CBV_PAM1504_c0_g1_i1	1.21211	0.522659	-0.959679	-0.775096
CBV_PAM68548_c0_g1_i1	1.30609	-0.138164	0.0691566	-1.23709
CBV_PAM12797_c0_g2_i1	0.40566	0.799959	0.325141	-1.53076
CBV_PAM59180_c0_g1_i1	1.45842	-0.0638363	-0.433627	-0.960958
CBV_PAM24350_c2_g1_i1	1.06368	0.678071	-1.12536	-0.616386
CBV_PAM67945_c0_g1_i1	1.21119	-0.0108809	0.124296	-1.32461
CBV_PAM306_c1_g1_i1	0.963894	0.362454	0.140675	-1.46702
CBV_PAM52197_c2_g1_i1	1.36307	0.200068	-0.558163	-1.00497
CBV_PAM67064_c0_g1_i1	1.41744	0.0878965	-0.569931	-0.935408
CBV_PAM2117_c0_g1_i1	1.24253	0.437446	-1.02501	-0.654964
CBV_PAM68092_c0_g1_i1	1.26966	0.372742	-1.03712	-0.605289
CBV_PAM6595_c0_g1_i1	1.28812	0.166329	-0.257512	-1.19694
CBV_PAM538_c2_g1_i1	1.32786	-0.0714683	-0.0681805	-1.18821
CBV_PAM54258_c0_g1_i1	1.40993	-0.0794096	-0.293307	-1.03721
CBV_PAM37414_c0_g1_i1	1.36483	0.121721	-0.451729	-1.03482
CBV_PAM45787_c0_g1_i1	1.2255	0.359908	-0.441053	-1.14435
CBV_PAM37835_c0_g1_i1	1.25009	0.419369	-0.869173	-0.800291
CBV_PAM43643_c0_g1_i1	1.08254	0.617771	-1.09863	-0.601683
CBV_PAM28493_c0_g1_i1	1.45432	-0.0568833	-0.601736	-0.795701
CBV_PAM56649_c0_g1_i1	1.34849	0.19395	-0.604216	-0.938222
CBV_PAM13076_c0_g1_i1	1.21587	0.405998	-0.554858	-1.06701
CBV_PAM52126_c3_g1_i1	1.25752	0.0304806	-0.0624168	-1.22558
CBV_PAM26787_c0_g1_i1	1.41774	0.0490289	-0.733384	-0.733384
CBV_PAM38640_c0_g1_i1	1.42967	0.0120958	-0.693245	-0.748522
CBV_PAM53202_c0_g1_i1	1.08757	0.412666	-0.200015	-1.30022
CBV_PAM54934_c0_g1_i1	0.863855	0.801018	-0.440244	-1.22463
CBV_PAM12008_c0_g1_i1	1.33312	0.18406	-0.516392	-1.00079
CBV_PAM40525_c0_g1_i1	0.823457	0.213283	0.432471	-1.46921
CBV_PAM16881_c0_g1_i1	1.29007	-0.117679	0.00366082	-1.17605
CBV_PAM16351_c0_g1_i1	1.30568	0.0563886	-0.226196	-1.13587
CBV_PAM12681_c1_g1_i1	0.885684	0.688655	-0.270304	-1.30403
CBV_PAM28573_c0_g1_i1	1.30076	0.235596	-0.541594	-0.994765
CBV_PAM39332_c1_g1_i1	0.833144	0.837023	-0.488588	-1.18158
CBV_PAM70158_c0_g1_i1	0.852633	0.886731	-0.904819	-0.834544
CBV_PAM28134_c0_g1_i1	1.19518	0.278085	-0.274602	-1.19867
CBV_PAM73448_c0_g1_i1	1.36803	0.0372705	-0.422726	-0.982576
CBV_PAM40073_c0_g2_i1	1.0891	0.188086	0.0606406	-1.33783
CBV_PAM20086_c0_g1_i1	1.34761	0.102319	-0.469266	-0.980662
CBV_PAM64458_c0_g2_i1	1.38257	-0.088832	-0.292054	-1.00169
CBV_PAM64171_c0_g1_i1	1.16565	0.163137	-0.0570606	-1.27173
CBV_PAM42754_c0_g1_i1	1.19793	0.387496	-0.507516	-1.07791
CBV_PAM2869_c0_g1_i1	0.712255	0.917038	-0.40943	-1.21986
CBV_PAM14767_c0_g1_i1	1.22163	-0.0198149	0.0260505	-1.22786
CBV_PAM66595_c0_g1_i1	1.35767	0.134826	-0.667251	-0.825243
CBV_PAM57868_c0_g1_i1	0.99712	0.479925	-0.160253	-1.31679
CBV_PAM29483_c0_g1_i1	0.665285	0.577469	0.225751	-1.46851
CBV_PAM40141_c0_g1_i1	0.995493	0.24214	0.144849	-1.38248
CBV_PAM37820_c0_g1_i1	1.15919	0.398312	-0.414104	-1.1434
CBV_PAM52005_c0_g1_i1	1.2813	0.287858	-0.672032	-0.897129
CBV_PAM55077_c0_g2_i1	0.958077	0.697049	-0.507716	-1.14741
CBV_PAM67286_c0_g1_i1	1.06306	0.538486	-0.430377	-1.17117
CBV_PAM62645_c0_g1_i1	1.38786	0.0541226	-0.660953	-0.781024
CBV_PAM51116_c0_g1_i1	0.814892	0.809799	-0.407988	-1.2167
CBV_PAM23711_c0_g1_i1	1.13825	0.238422	-0.114737	-1.26194
CBV_PAM4721_c0_g1_i1	1.03727	0.538569	-0.369695	-1.20615
CBV_PAM17699_c0_g1_i1	1.44192	-0.290866	-0.319344	-0.831709
CBV_PAM43214_c0_g1_i1	1.37372	0.0722439	-0.648019	-0.79794
CBV_PAM24103_c0_g1_i1	1.33563	0.0692485	-0.409203	-0.995672
CBV_PAM37548_c0_g1_i1	1.30783	0.228797	-0.768292	-0.768335
CBV_PAM1084_c0_g1_i1	1.0361	0.319539	-0.0264939	-1.32914
CBV_PAM15047_c0_g5_i1	0.60597	0.912176	-0.218601	-1.29954
CBV_PAM33252_c0_g1_i1	1.37303	-0.136762	-0.261814	-0.974451
CBV_PAM70867_c0_g1_i1	1.28089	0.0241969	-0.191322	-1.11377
CBV_PAM25535_c1_g1_i1	0.855249	0.80837	-0.558403	-1.10522
CBV_PAM10801_c0_g1_i1	1.02123	0.661408	-0.736919	-0.945715
CBV_PAM75087_c0_g1_i1	0.735142	0.787004	-0.215802	-1.30634
CBV_PAM59369_c0_g1_i1	1.13099	0.22167	-0.0993249	-1.25333
CBV_PAM38984_c1_g1_i1	1.2659	0.288173	-0.854582	-0.699491
CBV_PAM23686_c0_g3_i1	1.14638	0.49296	-0.779448	-0.859888
CBV_PAM51094_c0_g1_i1	1.19663	0.415047	-0.800136	-0.811542
CBV_PAM16424_c0_g1_i1	1.36907	0.053208	-0.627075	-0.795198
CBV_PAM28680_c0_g1_i1	0.992101	0.69837	-0.815234	-0.875236
CBV_PAM23966_c0_g1_i1	1.12004	0.505722	-0.626228	-0.99953
CBV_PAM30204_c0_g1_i1	1.05098	0.507572	-0.38365	-1.1749
CBV_PAM53361_c0_g1_i1	1.15164	0.469141	-0.688484	-0.932293
CBV_PAM73897_c0_g1_i1	1.06063	0.245666	-0.00181342	-1.30448
CBV_PAM14158_c0_g1_i1	1.17526	0.310694	-0.352643	-1.13331
CBV_PAM30971_c0_g1_i1	0.839062	0.774671	-0.43664	-1.17709
CBV_PAM64894_c0_g1_i1	1.04823	0.591025	-1.02946	-0.609798
CBV_PAM10977_c0_g1_i1	0.850935	0.630693	-0.166338	-1.31529
CBV_PAM454_c0_g1_i1	0.959593	0.698759	-1.03875	-0.619599
CBV_PAM18062_c0_g1_i1	0.621413	0.958532	-0.390999	-1.18895
CBV_PAM72294_c0_g1_i1	1.40114	-0.169244	-0.37043	-0.861471
CBV_PAM67227_c0_g1_i1	1.3184	-0.188535	-0.08629	-1.04358
CBV_PAM10255_c0_g1_i1	0.86206	0.6086	-0.157762	-1.3129
CBV_PAM37318_c0_g1_i1	1.31888	0.150902	-0.82922	-0.640558
CBV_PAM61406_c0_g1_i1	1.20763	0.35582	-0.914238	-0.649211
CBV_PAM57434_c0_g1_i1	1.3573	0.047373	-0.77255	-0.632126
CBV_PAM68235_c0_g1_i1	1.31909	0.0592403	-0.420336	-0.95799
CBV_PAM26083_c0_g1_i1	1.13368	0.451365	-0.57798	-1.00707
CBV_PAM38570_c0_g1_i1	1.28152	0.130207	-0.408765	-1.00297
CBV_PAM67479_c0_g1_i1	1.12721	0.264663	-0.185682	-1.20619
CBV_PAM50809_c0_g1_i1	1.00012	0.536703	-0.343713	-1.19311
CBV_PAM45261_c0_g1_i1	1.35473	0.0494022	-0.64746	-0.756672
CBV_PAM49587_c0_g1_i1	1.3126	-0.0672311	-0.222858	-1.02251
CBV_PAM67547_c0_g1_i1	1.2515	0.280536	-0.808809	-0.723223
CBV_PAM2717_c0_g1_i1	1.1033	-0.164657	0.284049	-1.22269
CBV_PAM45515_c0_g1_i1	1.36886	-0.0927438	-0.396206	-0.879914
CBV_PAM29176_c0_g1_i1	1.23807	0.0983728	-0.236174	-1.10027
CBV_PAM46370_c0_g1_i1	0.702953	0.917117	-0.528056	-1.09201
CBV_PAM1594_c1_g1_i1	1.18829	0.342923	-0.537323	-0.993891
CBV_PAM69202_c0_g1_i1	1.06926	0.50369	-1.0783	-0.494653
CBV_PAM44673_c0_g1_i1	1.05001	0.493973	-0.407511	-1.13647
CBV_PAM26878_c0_g1_i1	1.29744	0.0443883	-0.341419	-1.00041
CBV_PAM1727_c1_g1_i1	1.32059	0.0174632	-0.385087	-0.95297
CBV_PAM10946_c0_g1_i1	1.24524	0.169674	-0.376459	-1.03846
CBV_PAM9004_c0_g1_i1	1.21684	0.24777	-0.428265	-1.03635
CBV_PAM51136_c0_g1_i1	0.999591	0.585797	-0.48082	-1.10457
CBV_PAM57135_c0_g1_i1	1.08495	0.541051	-0.787929	-0.83807
CBV_PAM10961_c0_g4_i1	0.650086	0.9404	-0.463538	-1.12695
CBV_PAM27084_c0_g1_i1	1.32852	0.0926937	-0.666231	-0.754986
CBV_PAM730_c2_g1_i1	1.27236	0.191162	-0.564579	-0.898938
CBV_PAM28624_c0_g1_i1	1.29359	0.161677	-0.62592	-0.829347
CBV_PAM27301_c1_g1_i1	1.08644	-0.0053843	0.171631	-1.25268
CBV_PAM37879_c2_g1_i1	1.29978	0.152304	-0.650233	-0.80185
CBV_PAM72873_c1_g1_i1	1.28774	0.167438	-0.601594	-0.853589
CBV_PAM52476_c1_g1_i1	1.24558	0.248921	-0.597091	-0.897408
CBV_PAM74775_c0_g1_i1	1.10338	0.394655	-0.382397	-1.11564
CBV_PAM24547_c0_g1_i1	0.916427	0.410515	-0.00245468	-1.32449
CBV_PAM25523_c1_g1_i1	0.943652	0.254108	0.138412	-1.33617
CBV_PAM53384_c0_g1_i1	1.30378	-0.0483488	-0.262491	-0.992938
CBV_PAM18657_c0_g1_i1	1.12808	0.437896	-0.606463	-0.959509
CBV_PAM26004_c0_g1_i1	1.33934	-0.0553911	-0.385859	-0.898086
CBV_PAM12900_c0_g1_i1	0.777942	0.310949	0.307566	-1.39646
CBV_PAM24640_c0_g1_i1	1.34393	-0.0121419	-0.519486	-0.812301
CBV_PAM863_c2_g1_i1	1.19477	0.0445313	-0.101331	-1.13797
CBV_PAM10202_c0_g1_i1	1.26433	-0.0211987	-0.1958	-1.04733
CBV_PAM69034_c0_g1_i1	1.33645	0.0204374	-0.58107	-0.775814
CBV_PAM26582_c0_g1_i1	1.22749	0.0782985	-0.228677	-1.07712
CBV_PAM68585_c0_g1_i1	1.32533	0.0536869	-0.612297	-0.766722
CBV_PAM47987_c0_g1_i1	0.948436	0.690092	-0.863894	-0.774634
CBV_PAM10304_c0_g1_i1	1.07718	0.397352	-0.341757	-1.13278
CBV_PAM13641_c0_g1_i1	1.11296	0.0944843	0.00438548	-1.21183
CBV_PAM59850_c0_g1_i1	1.30467	0.0950216	-0.593718	-0.805977
CBV_PAM34569_c0_g1_i1	0.707626	0.70609	-0.110083	-1.30363
CBV_PAM3680_c0_g1_i1	0.840259	0.473622	0.0182832	-1.33216
CBV_PAM66942_c0_g1_i1	1.3305	0.028606	-0.618701	-0.740402
CBV_PAM38828_c0_g1_i1	1.16734	0.253983	-0.353274	-1.06805
CBV_PAM66282_c0_g1_i1	1.23584	0.168724	-0.434591	-0.969969
CBV_PAM52515_c0_g1_i1	1.13682	0.22038	-0.219562	-1.13763
CBV_PAM62313_c0_g1_i1	1.19408	0.0912106	-0.185052	-1.10024
CBV_PAM38630_c0_g1_i1	0.936473	0.539004	-0.278308	-1.19717
CBV_PAM4604_c0_g1_i1	1.26494	0.0694356	-0.365451	-0.968922
CBV_PAM35716_c0_g1_i1	0.539748	0.608978	0.24764	-1.39637
CBV_PAM51595_c1_g1_i1	0.921875	0.546999	-0.263391	-1.20548
CBV_PAM70198_c0_g1_i1	1.2672	0.019732	-0.30256	-0.984376
CBV_PAM11603_c0_g1_i1	1.30097	-0.0957972	-0.259338	-0.945838
CBV_PAM25108_c0_g1_i1	1.05265	-0.0255713	0.202741	-1.22982
CBV_PAM69142_c0_g1_i1	1.3379	-0.0508187	-0.501089	-0.785997
CBV_PAM42329_c0_g1_i1	1.24945	-0.0424361	-0.176144	-1.03087
CBV_PAM59238_c0_g1_i1	1.36612	-0.226139	-0.368936	-0.771046
CBV_PAM11115_c0_g1_i1	1.1611	0.306166	-0.97993	-0.48734
CBV_PAM57778_c0_g3_i1	0.841869	0.221995	0.279109	-1.34297
CBV_PAM28882_c0_g1_i1	1.00058	-0.0821655	0.318558	-1.23697
CBV_PAM12914_c0_g1_i1	1.28931	-0.374779	-0.00230539	-0.912224
CBV_PAM591_c1_g1_i1	1.29568	0.0760944	-0.630717	-0.741061
CBV_PAM41438_c1_g1_i1	1.31245	-0.208668	-0.198578	-0.905201
CBV_PAM13924_c0_g1_i1	0.786558	0.802251	-1.0153	-0.573509
CBV_PAM56568_c0_g1_i1	1.19556	-0.119118	-3.71661e-06	-1.07643
CBV_PAM12181_c0_g1_i1	1.23523	0.202441	-0.734936	-0.702734
CBV_PAM67821_c0_g1_i1	1.31553	-0.0725641	-0.409255	-0.83371
CBV_PAM60201_c0_g1_i1	1.14706	0.126671	-0.169753	-1.10398
CBV_PAM10703_c0_g1_i1	1.17365	0.297486	-0.621626	-0.849505
CBV_PAM25461_c0_g1_i1	0.888722	0.268081	0.143748	-1.30055
CBV_PAM13797_c0_g1_i1	0.866715	0.506071	-0.128245	-1.24454
CBV_PAM38946_c1_g1_i1	1.2919	0.00809524	-0.482415	-0.817583
CBV_PAM50689_c0_g1_i1	0.852226	0.218689	0.245371	-1.31629
CBV_PAM51121_c1_g1_i1	0.642809	0.278411	0.448109	-1.36933
CBV_PAM25028_c0_g1_i1	0.507573	1.04	-0.677527	-0.87005
CBV_PAM64309_c1_g1_i1	0.857432	0.623624	-0.331653	-1.1494
CBV_PAM60999_c0_g1_i1	1.23349	-0.258174	0.00490378	-0.980217
CBV_PAM72100_c0_g1_i1	1.21457	0.127663	-0.392369	-0.949868
CBV_PAM3285_c0_g1_i1	1.33018	-0.206393	-0.334553	-0.789234
CBV_PAM25763_c0_g1_i1	1.161	0.18338	-0.31422	-1.03016
CBV_PAM66487_c0_g1_i1	0.917457	0.599576	-0.451353	-1.06568
CBV_PAM16341_c0_g1_i1	1.04702	0.493058	-0.848884	-0.691193
CBV_PAM65790_c1_g1_i1	1.16654	0.213932	-0.395234	-0.985241
CBV_PAM17707_c0_g1_i1	1.31351	-0.0903079	-0.464288	-0.75891
CBV_PAM29316_c0_g1_i1	1.27144	0.0190668	-0.459728	-0.83078
CBV_PAM4732_c0_g1_i1	0.691319	0.552516	0.0712604	-1.3151
CBV_PAM52563_c0_g1_i1	0.994613	0.373877	-0.208785	-1.15971
CBV_PAM17357_c0_g1_i1	1.12579	0.36753	-0.75203	-0.741288
CBV_PAM73881_c0_g1_i1	1.02259	0.349876	-0.234839	-1.13763
CBV_PAM3241_c1_g1_i1	1.28202	0.0298332	-0.581667	-0.730183
CBV_PAM72314_c0_g1_i1	1.11703	0.378446	-0.78439	-0.711083
CBV_PAM25806_c1_g1_i1	1.28298	-0.0609862	-0.373915	-0.848081
CBV_PAM73983_c0_g1_i1	1.26342	0.0815287	-0.674264	-0.670688
CBV_PAM12960_c0_g1_i1	1.17907	0.264785	-0.744675	-0.699184
CBV_PAM4790_c0_g1_i1	1.19122	0.236763	-0.767785	-0.6602
CBV_PAM54508_c1_g1_i1	1.0422	0.430334	-0.474625	-0.997905
CBV_PAM1993_c3_g1_i1	1.16726	0.178703	-0.365801	-0.980158
CBV_PAM70349_c0_g1_i1	0.557023	0.673031	0.0808098	-1.31086
CBV_PAM40476_c0_g1_i1	0.997574	0.546429	-0.773086	-0.770917
CBV_PAM2611_c1_g1_i1	0.947745	0.395334	-0.158671	-1.18441
CBV_PAM43092_c0_g1_i1	1.0224	0.449324	-0.464437	-1.00729
CBV_PAM18726_c0_g1_i1	1.2558	0.0614536	-0.539026	-0.778227
CBV_PAM58645_c0_g1_i1	0.985574	0.528551	-0.952594	-0.561531
CBV_PAM59883_c0_g1_i1	0.788481	0.699233	-0.388289	-1.09942
CBV_PAM38314_c0_g1_i1	0.601126	0.788643	-0.186095	-1.20367
CBV_PAM6386_c0_g1_i1	1.10478	0.373507	-0.822344	-0.655946
CBV_PAM30832_c0_g1_i1	1.04812	0.302275	-0.250094	-1.1003
CBV_PAM25820_c0_g1_i1	1.28482	-0.0347016	-0.51458	-0.735536
CBV_PAM52487_c0_g1_i1	0.959822	0.522158	-0.454102	-1.02788
CBV_PAM24997_c2_g1_i1	1.27463	-0.256243	-0.158893	-0.859492
CBV_PAM26406_c0_g1_i1	1.0948	0.345974	-0.506103	-0.934676
CBV_PAM42665_c1_g1_i1	1.0875	0.0922409	-0.0641446	-1.11559
CBV_PAM45660_c0_g1_i1	0.645716	0.535042	0.127307	-1.30806
CBV_PAM56588_c0_g1_i1	1.21237	0.0672119	-0.379751	-0.899826
CBV_PAM29999_c0_g1_i1	1.2796	-0.0775924	-0.427411	-0.774595
CBV_PAM61272_c0_g1_i1	1.10605	0.278145	-0.405328	-0.978872
CBV_PAM66576_c0_g1_i1	0.787022	0.751436	-0.935003	-0.603454
CBV_PAM3558_c0_g1_i1	1.14724	0.223612	-0.450522	-0.920327
CBV_PAM4263_c0_g1_i1	0.888061	0.516945	-0.278226	-1.12678
CBV_PAM2582_c0_g1_i1	0.980812	0.454123	-0.398285	-1.03665
CBV_PAM33222_c0_g1_i1	1.28461	-0.165916	-0.341517	-0.777173
CBV_PAM56682_c0_g1_i1	1.26115	0.00459017	-0.582254	-0.683483
CBV_PAM52788_c0_g1_i1	1.19071	-0.071346	-0.143238	-0.976121
CBV_PAM70118_c0_g1_i1	1.08925	0.302402	-0.425884	-0.965771
CBV_PAM31254_c0_g1_i1	1.13452	0.285253	-0.797828	-0.621947
CBV_PAM16203_c0_g1_i1	1.00578	0.352037	-0.270894	-1.08692
CBV_PAM23936_c0_g1_i1	0.506646	0.536788	0.284641	-1.32807
CBV_PAM26980_c0_g1_i1	1.25308	-0.0392785	-0.40545	-0.808348
CBV_PAM70287_c0_g1_i1	1.2575	-0.0462768	-0.427086	-0.784139
CBV_PAM40612_c0_g1_i1	1.05312	0.299147	-0.312946	-1.03932
CBV_PAM38476_c1_g1_i1	0.938314	0.185494	0.0793491	-1.20316
CBV_PAM12724_c0_g1_i1	1.18131	0.132717	-0.449041	-0.864985
CBV_PAM51728_c0_g1_i1	0.670836	0.675919	-0.150051	-1.1967
CBV_PAM53299_c0_g1_i1	0.946389	0.435951	-0.29433	-1.08801
CBV_PAM41042_c1_g1_i1	1.08508	0.157542	-0.185107	-1.05751
CBV_PAM31496_c0_g1_i1	0.658238	0.605132	-0.0170227	-1.24635
CBV_PAM64752_c0_g1_i1	0.94164	0.453699	-0.321732	-1.07361
CBV_PAM54004_c0_g1_i1	0.916541	0.586055	-0.628294	-0.874302
CBV_PAM3814_c0_g1_i1	0.965318	0.527953	-0.654248	-0.839023
CBV_PAM65338_c0_g1_i1	1.12145	0.248323	-0.479936	-0.889839
CBV_PAM2401_c1_g1_i1	1.14136	0.251947	-0.735135	-0.658176
CBV_PAM51173_c0_g1_i1	0.990622	0.380794	-0.31634	-1.05508
CBV_PAM51799_c0_g1_i1	1.09497	0.163369	-0.22997	-1.02837
CBV_PAM25470_c0_g1_i1	0.959801	0.317245	-0.13967	-1.13738
CBV_PAM37605_c0_g1_i1	1.16477	0.198224	-0.6121	-0.750897
CBV_PAM12977_c0_g1_i1	1.07284	0.372119	-0.732961	-0.711998
CBV_PAM57551_c0_g1_i1	0.93987	0.50103	-0.438138	-1.00276
CBV_PAM42036_c0_g1_i1	0.907173	0.383155	-0.131139	-1.15919
CBV_PAM44363_c0_g1_i1	1.08085	0.143314	-0.169787	-1.05437
CBV_PAM56263_c0_g1_i1	0.661787	0.583684	-0.000498685	-1.24497
CBV_PAM13845_c0_g1_i1	1.02286	0.190989	-0.103692	-1.11015
CBV_PAM77160_c0_g1_i1	0.559271	0.797166	-0.200403	-1.15603
CBV_PAM10783_c0_g1_i1	1.11328	0.284783	-0.812055	-0.586012
CBV_PAM12653_c0_g1_i1	1.23976	-0.0750358	-0.356703	-0.808022
CBV_PAM18330_c0_g1_i1	0.904296	0.604552	-0.777025	-0.731823
CBV_PAM41314_c0_g1_i1	1.12424	0.0946941	-0.219176	-0.999759
CBV_PAM46125_c0_g1_i1	1.20129	0.109958	-0.603708	-0.707542
CBV_PAM16846_c0_g1_i1	1.00398	0.431228	-0.501115	-0.934094
CBV_PAM65573_c1_g1_i1	1.21674	0.0522368	-0.514477	-0.754496
CBV_PAM42298_c0_g1_i1	1.18905	0.079981	-0.430619	-0.838411
CBV_PAM21407_c0_g1_i1	1.18075	0.125725	-0.511163	-0.795312
CBV_PAM38347_c0_g1_i1	1.21517	-0.0530837	-0.308725	-0.853361
CBV_PAM1674_c1_g1_i1	0.872972	0.421126	-0.13615	-1.15795
CBV_PAM21170_c0_g1_i1	0.77496	0.659647	-0.37606	-1.05855
CBV_PAM24772_c0_g1_i1	0.848934	0.427344	-0.10147	-1.17481
CBV_PAM37482_c1_g1_i1	0.995866	0.157821	-0.024091	-1.1296
CBV_PAM41625_c0_g1_i1	0.565416	0.707541	-0.0615504	-1.21141
CBV_PAM14999_c0_g1_i1	1.15001	0.136092	-0.403756	-0.882348
CBV_PAM12192_c0_g1_i1	0.912401	0.497602	-0.391601	-1.0184
CBV_PAM43313_c0_g1_i1	1.11098	0.118533	-0.249798	-0.979718
CBV_PAM24819_c1_g1_i1	1.15559	0.157322	-0.510811	-0.802104
CBV_PAM4177_c0_g1_i1	0.839837	0.619294	-0.497411	-0.961719
CBV_PAM16216_c0_g1_i1	0.966818	0.0975658	0.0796694	-1.14405
CBV_PAM28378_c0_g1_i1	1.14665	0.162318	-0.482032	-0.826931
CBV_PAM54812_c0_g1_i1	0.948597	0.495139	-0.537257	-0.906479
CBV_PAM37489_c0_g1_i1	1.22065	-0.00648518	-0.489529	-0.724641
CBV_PAM55488_c0_g1_i1	0.716596	0.643677	-0.231966	-1.12831
CBV_PAM52714_c0_g1_i1	1.1622	-0.136406	-0.0919692	-0.933828
CBV_PAM27662_c0_g1_i1	1.04577	0.0324469	-0.00428726	-1.07393
CBV_PAM29420_c0_g1_i1	1.13181	0.221191	-0.667215	-0.685786
CBV_PAM67538_c0_g1_i1	1.04955	0.367107	-0.673428	-0.743225
CBV_PAM15636_c0_g1_i1	0.996167	0.440677	-0.825576	-0.611268
CBV_PAM52960_c0_g1_i1	0.820006	0.340607	0.0423484	-1.20296
CBV_PAM38277_c0_g1_i1	1.05332	0.355605	-0.644351	-0.764575
CBV_PAM44196_c0_g1_i1	0.993404	0.433801	-0.573789	-0.853416
CBV_PAM15166_c0_g1_i1	1.22018	-0.0605155	-0.400299	-0.759365
CBV_PAM11567_c0_g1_i1	0.810496	0.611468	-0.409059	-1.0129
CBV_PAM42063_c0_g1_i1	1.21134	-0.0816327	-0.328639	-0.801065
CBV_PAM26585_c0_g1_i1	1.03483	0.108478	-0.0787521	-1.06455
CBV_PAM34696_c0_g1_i1	0.992218	0.236687	-0.153267	-1.07564
CBV_PAM33180_c0_g1_i1	1.17446	0.0991	-0.541684	-0.731878
CBV_PAM69669_c0_g1_i1	0.762172	0.3815	0.0718457	-1.21552
CBV_PAM1581_c0_g1_i1	1.05798	0.306583	-0.512717	-0.851846
CBV_PAM68937_c0_g1_i1	0.830535	0.646823	-0.758572	-0.718786
CBV_PAM25934_c1_g1_i1	1.00574	0.411856	-0.625742	-0.791852
CBV_PAM14128_c0_g1_i1	1.11005	-0.0628629	-0.0694036	-0.977788
CBV_PAM59233_c0_g1_i1	0.783284	0.69152	-0.644276	-0.830528
CBV_PAM3101_c0_g1_i1	0.798123	0.435699	-0.067668	-1.16615
CBV_PAM10233_c0_g1_i1	1.12012	0.138509	-0.382257	-0.876374
CBV_PAM11781_c1_g1_i1	1.06692	0.214895	-0.348013	-0.933802
CBV_PAM7581_c1_g1_i1	0.980151	0.42077	-0.529597	-0.871324
CBV_PAM26192_c2_g1_i1	0.93343	0.172869	0.0197782	-1.12608
CBV_PAM40778_c0_g1_i1	0.505567	0.75614	-0.109379	-1.15233
CBV_PAM51186_c2_g1_i1	1.05048	0.237045	-0.355447	-0.932078
CBV_PAM20941_c0_g1_i1	0.773586	0.586003	-0.300698	-1.05889
CBV_PAM8482_c0_g1_i1	1.0822	-0.0574793	-0.0423498	-0.98237
CBV_PAM26759_c1_g1_i1	0.801601	0.656827	-0.735775	-0.722653
CBV_PAM70959_c0_g1_i1	0.973819	0.385886	-0.441097	-0.918608
CBV_PAM54513_c0_g1_i1	1.0618	0.187154	-0.315572	-0.933383
CBV_PAM41079_c0_g1_i1	0.951247	0.44143	-0.522111	-0.870566
CBV_PAM26130_c0_g1_i1	1.16215	-0.097991	-0.214474	-0.849687
CBV_PAM24147_c4_g1_i1	1.13626	0.118807	-0.515734	-0.739336
CBV_PAM15452_c0_g1_i1	0.817251	0.537708	-0.329232	-1.02573
CBV_PAM53432_c0_g1_i1	0.771087	0.680673	-0.777717	-0.674043
CBV_PAM39158_c0_g1_i1	0.939221	0.463355	-0.595727	-0.806849
CBV_PAM37336_c0_g1_i1	0.761196	0.471092	-0.0960224	-1.13627
CBV_PAM32951_c0_g1_i1	1.07631	0.0703595	-0.201938	-0.94473
CBV_PAM8696_c0_g1_i1	1.07993	0.233756	-0.577862	-0.735823
CBV_PAM72319_c0_g1_i1	1.10067	0.120412	-0.361318	-0.859761
CBV_PAM56889_c0_g1_i1	1.09856	0.129904	-0.378057	-0.850403
CBV_PAM24278_c0_g1_i1	0.621163	0.783799	-0.476692	-0.928271
CBV_PAM2265_c2_g1_i1	0.673627	0.486039	0.0192744	-1.17894
CBV_PAM19194_c0_g1_i1	0.826989	0.602908	-0.785813	-0.644084
CBV_PAM780_c1_g1_i1	0.683194	0.741649	-0.558694	-0.866149
CBV_PAM52302_c1_g1_i1	1.15956	0.0366896	-0.504644	-0.691603
CBV_PAM67300_c0_g1_i1	0.93569	0.240232	-0.11308	-1.06284
CBV_PAM31047_c0_g1_i1	0.69788	0.714652	-0.512248	-0.900284
CBV_PAM67229_c0_g1_i1	0.942863	0.407103	-0.447914	-0.902051
CBV_PAM44133_c0_g1_i1	1.13588	0.0213031	-0.348052	-0.809135
CBV_PAM28783_c0_g1_i1	1.07402	0.226874	-0.569887	-0.731007
CBV_PAM16709_c0_g1_i1	0.810618	0.617368	-0.70817	-0.719816
CBV_PAM15257_c0_g1_i1	0.694344	0.714493	-0.518137	-0.890699
CBV_PAM2287_c0_g1_i1	1.12505	0.10698	-0.542715	-0.689314
CBV_PAM68040_c0_g1_i1	0.885003	0.38938	-0.251306	-1.02308
CBV_PAM1287_c2_g1_i1	1.06684	0.203494	-0.47079	-0.799546
CBV_PAM39157_c0_g1_i1	0.802236	0.611732	-0.701942	-0.712026
CBV_PAM40269_c0_g1_i1	0.943381	0.0907186	0.0226467	-1.05675
CBV_PAM53637_c1_g1_i1	0.850886	0.551408	-0.665766	-0.736527
CBV_PAM2406_c1_g1_i1	1.07813	0.089761	-0.300777	-0.867111
CBV_PAM24119_c0_g1_i1	0.809562	0.413695	-0.143758	-1.0795
CBV_PAM24194_c0_g1_i1	0.755135	0.625456	-0.47301	-0.907581
CBV_PAM29643_c0_g1_i1	0.902843	0.369805	-0.286049	-0.9866
CBV_PAM26729_c0_g1_i1	0.836368	0.371915	-0.135704	-1.07258
CBV_PAM26936_c0_g1_i1	1.01188	0.237818	-0.363433	-0.88626
CBV_PAM29343_c0_g1_i1	0.680924	0.719849	-0.577655	-0.823118
CBV_PAM28787_c0_g1_i1	1.11525	-0.229587	-0.0528687	-0.832791
CBV_PAM14774_c0_g1_i1	0.656651	0.62932	-0.233291	-1.05268
CBV_PAM26640_c0_g1_i1	1.07057	0.197708	-0.638579	-0.629702
CBV_PAM30408_c0_g1_i1	1.10334	0.0676313	-0.384731	-0.786236
CBV_PAM69491_c0_g1_i1	0.964348	0.384205	-0.652347	-0.696205
CBV_PAM25709_c0_g1_i1	0.829809	0.475887	-0.321458	-0.984237
CBV_PAM38850_c0_g1_i1	1.147	-0.0796932	-0.319621	-0.747682
CBV_PAM39540_c0_g1_i1	0.92063	0.192315	-0.0671788	-1.04577
CBV_PAM5587_c0_g1_i1	0.896397	0.465794	-0.571832	-0.790359
CBV_PAM65221_c0_g1_i1	1.04838	-0.0406561	-0.0779837	-0.929736
CBV_PAM39681_c0_g1_i1	0.597847	0.581694	-0.0531959	-1.12635
CBV_PAM66251_c0_g1_i1	0.764435	0.628508	-0.602538	-0.790404
CBV_PAM54989_c0_g1_i1	0.906708	0.4276	-0.478267	-0.856041
CBV_PAM70958_c0_g1_i1	0.924233	0.382179	-0.418404	-0.888008
CBV_PAM27907_c0_g1_i1	0.988188	0.246015	-0.334205	-0.899998
CBV_PAM69153_c0_g1_i1	1.08317	0.0114398	-0.242347	-0.852267
CBV_PAM39087_c0_g1_i1	0.99318	0.153867	-0.192546	-0.9545
CBV_PAM56796_c0_g1_i1	0.766784	0.609286	-0.844298	-0.531773
CBV_PAM13233_c0_g1_i1	0.764891	0.273854	0.0946124	-1.13336
CBV_PAM41565_c0_g1_i1	1.0172	0.163318	-0.27832	-0.902196
CBV_PAM44791_c0_g1_i1	1.06333	0.187247	-0.579285	-0.671289
CBV_PAM22091_c0_g1_i1	0.944059	0.334931	-0.38637	-0.89262
CBV_PAM4130_c0_g1_i1	0.821054	0.561763	-0.724808	-0.65801
CBV_PAM10920_c0_g1_i1	1.04353	0.204475	-0.48841	-0.759596
CBV_PAM9025_c0_g1_i1	0.946372	0.361123	-0.473086	-0.834409
CBV_PAM41357_c0_g1_i1	1.10986	0.0186653	-0.367927	-0.760603
CBV_PAM40017_c0_g1_i1	0.825156	0.410265	-0.209712	-1.02571
CBV_PAM12017_c3_g1_i1	0.943925	0.376932	-0.523245	-0.797613
CBV_PAM33896_c0_g1_i1	0.957912	0.34256	-0.508712	-0.79176
CBV_PAM25949_c0_g1_i1	1.11104	0.00723241	-0.387136	-0.731133
CBV_PAM56286_c0_g1_i1	1.127	-0.0553519	-0.348284	-0.723363
CBV_PAM2488_c0_g1_i1	1.07372	0.000674693	-0.232805	-0.841592
CBV_PAM31651_c0_g1_i1	0.696952	0.591141	-0.296328	-0.991765
CBV_PAM5814_c0_g1_i1	0.593598	0.641171	-0.18949	-1.04528
CBV_PAM31346_c0_g1_i1	0.787273	0.253987	0.0523188	-1.09358
CBV_PAM12922_c0_g1_i1	0.926181	0.144003	-0.0712743	-0.998909
CBV_PAM23661_c1_g1_i1	1.02928	0.0642915	-0.216536	-0.877035
CBV_PAM12265_c1_g1_i1	0.763401	0.174909	0.17252	-1.11083
CBV_PAM15626_c0_g1_i1	0.985785	0.0906509	-0.141098	-0.935338
CBV_PAM64868_c1_g1_i1	0.652674	0.376433	0.106174	-1.13528
CBV_PAM67254_c0_g1_i1	1.07349	0.0265837	-0.319301	-0.780774
CBV_PAM51030_c0_g1_i1	0.821027	0.307083	-0.0854934	-1.04262
CBV_PAM60287_c0_g1_i1	0.993006	0.272097	-0.646385	-0.618718
CBV_PAM13045_c0_g1_i1	1.0082	0.138522	-0.289131	-0.857592
CBV_PAM66955_c0_g1_i1	1.10121	0.00742972	-0.446597	-0.662039
CBV_PAM3609_c0_g1_i1	0.847393	0.322851	-0.174468	-0.995776
CBV_PAM64641_c0_g1_i1	0.718862	0.480555	-0.166141	-1.03328
CBV_PAM1913_c1_g1_i1	1.00138	0.169063	-0.334886	-0.83556
CBV_PAM11023_c1_g1_i1	0.862678	0.222714	-0.0641725	-1.02122
CBV_PAM8287_c0_g1_i1	0.828594	0.50831	-0.637159	-0.699745
CBV_PAM30941_c0_g1_i1	0.909491	0.388153	-0.75026	-0.547384
CBV_PAM52135_c0_g1_i1	0.955825	0.0638989	-0.0615695	-0.958154
CBV_PAM40127_c0_g1_i1	0.983645	0.00969278	-0.065266	-0.928072
CBV_PAM10357_c0_g2_i1	1.09671	-0.0891958	-0.265197	-0.742317
CBV_PAM45785_c0_g1_i1	0.855093	0.451735	-0.50771	-0.799118
CBV_PAM53818_c0_g1_i1	1.05468	0.0936159	-0.415303	-0.732996
CBV_PAM68991_c0_g1_i1	0.981644	0.122834	-0.205878	-0.898599
CBV_PAM53122_c0_g1_i1	0.667468	0.683696	-0.670756	-0.680407
CBV_PAM29527_c0_g1_i1	0.895108	0.337069	-0.341604	-0.890574
CBV_PAM28911_c0_g1_i1	0.489771	0.639691	-0.0472925	-1.08217
CBV_PAM50842_c3_g1_i1	1.00502	0.211299	-0.491163	-0.725153
CBV_PAM41502_c0_g1_i1	1.01243	0.130533	-0.330786	-0.812178
CBV_PAM53776_c0_g1_i1	0.830552	0.267279	-0.0809891	-1.01684
CBV_PAM13787_c0_g1_i1	1.04174	0.0312309	-0.273889	-0.799083
CBV_PAM68459_c0_g1_i1	1.0464	0.115939	-0.504641	-0.657697
CBV_PAM29779_c0_g1_i1	0.894	0.390833	-0.555615	-0.729218
CBV_PAM56031_c0_g2_i1	1.00646	0.205484	-0.568909	-0.643034
CBV_PAM56031_c0_g1_i1	1.00646	0.205484	-0.568909	-0.643034
CBV_PAM64982_c2_g1_i1	0.743972	0.419108	-0.143115	-1.01997
CBV_PAM42719_c0_g1_i1	1.03183	0.146878	-0.525652	-0.653061
CBV_PAM11622_c1_g1_i1	0.844545	0.461781	-0.699743	-0.606583
CBV_PAM4943_c0_g1_i1	0.916423	0.126132	-0.0831866	-0.959368
CBV_PAM39711_c0_g1_i1	0.800452	0.5113	-0.752379	-0.559374
CBV_PAM42266_c0_g1_i1	0.730123	0.538221	-0.356712	-0.911632
CBV_PAM67038_c1_g1_i1	0.952824	0.212438	-0.312996	-0.852266
CBV_PAM53937_c0_g1_i1	1.02381	0.0592002	-0.285567	-0.797445
CBV_PAM51366_c0_g1_i1	0.901093	0.363971	-0.533862	-0.731202
CBV_PAM3287_c0_g1_i1	0.930642	0.102784	-0.0964832	-0.936942
CBV_PAM54805_c0_g1_i1	0.832317	0.258249	-0.0930121	-0.997554
CBV_PAM40468_c0_g1_i1	0.521158	0.675898	-0.199671	-0.997385
CBV_PAM3356_c1_g1_i1	1.05137	-0.0143555	-0.28419	-0.752822
CBV_PAM56077_c0_g1_i1	1.00335	0.180499	-0.515888	-0.667964
CBV_PAM38794_c0_g1_i1	0.905365	0.125769	-0.0810812	-0.950052
CBV_PAM64577_c0_g1_i1	0.946118	0.185112	-0.273194	-0.858037
CBV_PAM11804_c0_g1_i1	1.07114	-0.0725695	-0.293551	-0.705023
CBV_PAM26455_c0_g1_i1	1.00167	0.0978848	-0.308725	-0.790833
CBV_PAM60168_c0_g1_i1	0.866967	0.221675	-0.133573	-0.955068
CBV_PAM66344_c1_g1_i1	0.951905	0.239151	-0.426619	-0.764438
CBV_PAM75224_c0_g1_i1	0.884167	0.240797	-0.206103	-0.918861
CBV_PAM50690_c4_g1_i1	0.945983	0.280674	-0.605984	-0.620673
CBV_PAM56205_c0_g1_i1	0.828123	0.313746	-0.191606	-0.950263
CBV_PAM24802_c0_g1_i1	0.965041	0.0695051	-0.162296	-0.872249
CBV_PAM25959_c0_g1_i1	1.02844	0.0560091	-0.351095	-0.733355
CBV_PAM54828_c0_g1_i1	0.874891	0.377695	-0.746453	-0.506133
CBV_PAM15014_c0_g1_i1	0.999179	0.0919364	-0.304623	-0.786492
CBV_PAM37500_c0_g1_i1	0.817546	0.429174	-0.417146	-0.829575
CBV_PAM25608_c1_g1_i1	1.00363	0.108899	-0.369862	-0.74267
CBV_PAM69845_c0_g1_i1	0.84639	0.413577	-0.525612	-0.734355
CBV_PAM13344_c0_g1_i1	0.843831	0.150963	-0.0115449	-0.98325
CBV_PAM71760_c0_g1_i1	0.915934	0.216158	-0.270649	-0.861443
CBV_PAM20064_c0_g1_i1	0.6378	0.512008	-0.144409	-1.0054
CBV_PAM10393_c4_g1_i1	0.792076	0.484883	-0.542921	-0.734038
CBV_PAM68554_c2_g1_i1	0.986538	0.107956	-0.311391	-0.783103
CBV_PAM14714_c1_g1_i1	0.527535	0.61023	-0.123398	-1.01437
CBV_PAM16460_c0_g1_i1	0.779488	0.315757	-0.108052	-0.987193
CBV_PAM12998_c1_g1_i1	0.989318	0.124115	-0.35788	-0.755552
CBV_PAM56789_c0_g1_i1	1.02467	-0.0780228	-0.16825	-0.778396
CBV_PAM3495_c0_g1_i1	0.759537	0.468627	-0.349984	-0.878179
CBV_PAM68311_c0_g1_i1	0.496784	0.678916	-0.210342	-0.965359
CBV_PAM68037_c0_g1_i1	1.0164	0.0127592	-0.269739	-0.759417
CBV_PAM75140_c0_g1_i1	0.9884	0.0411783	-0.222677	-0.806902
CBV_PAM50869_c0_g1_i1	0.82216	0.413265	-0.435215	-0.80021
CBV_PAM53502_c0_g1_i1	0.794005	0.1459	0.0695976	-1.0095
CBV_PAM25306_c0_g1_i1	0.650067	0.493563	-0.157269	-0.986361
CBV_PAM40385_c1_g1_i1	0.776549	0.320879	-0.128349	-0.969079
CBV_PAM44603_c0_g1_i1	0.965127	0.0547357	-0.192627	-0.827236
CBV_PAM33520_c0_g1_i1	0.619943	0.585833	-0.28584	-0.919936
CBV_PAM28613_c0_g1_i1	0.492661	0.518972	0.0553305	-1.06696
CBV_PAM43233_c0_g1_i1	0.74676	0.379206	-0.165319	-0.960647
CBV_PAM33223_c0_g1_i1	0.948077	0.153346	-0.303461	-0.797962
CBV_PAM12938_c1_g1_i1	0.649317	0.375888	0.0155722	-1.04078
CBV_PAM70348_c0_g1_i1	0.857171	0.227959	-0.174783	-0.910348
CBV_PAM49998_c0_g1_i1	0.956593	0.177028	-0.412109	-0.721511
CBV_PAM20584_c0_g1_i1	0.915166	0.124079	-0.172283	-0.866962
CBV_PAM56975_c0_g1_i1	0.550114	0.67587	-0.373206	-0.852777
CBV_PAM70445_c0_g1_i1	0.873909	0.339421	-0.539037	-0.674293
CBV_PAM18780_c0_g1_i1	0.911246	0.169956	-0.24184	-0.839362
CBV_PAM37952_c0_g1_i1	0.708427	0.546993	-0.75262	-0.502799
CBV_PAM51924_c0_g1_i1	0.897978	0.127608	-0.144872	-0.880714
CBV_PAM51710_c1_g1_i1	0.917136	0.175273	-0.271678	-0.820731
CBV_PAM25085_c1_g1_i1	0.890589	0.305944	-0.517159	-0.679375
CBV_PAM69066_c0_g1_i1	0.732005	0.526806	-0.659049	-0.599761
CBV_PAM2083_c0_g1_i1	0.796861	0.297541	-0.169793	-0.924608
CBV_PAM37905_c0_g1_i1	0.590797	0.507948	-0.104823	-0.993922
CBV_PAM11919_c0_g1_i1	0.944943	0.210574	-0.567185	-0.588331
CBV_PAM72183_c0_g1_i1	0.799183	0.300116	-0.182341	-0.916958
CBV_PAM11853_c0_g1_i1	0.974086	0.0592109	-0.27615	-0.757148
CBV_PAM24313_c0_g1_i1	0.803691	0.219079	-0.0770083	-0.945763
CBV_PAM835_c2_g1_i1	0.753866	0.383429	-0.230327	-0.906968
CBV_PAM25167_c2_g1_i1	0.839066	0.233216	-0.17743	-0.894853
CBV_PAM26845_c1_g1_i1	0.825889	0.266903	-0.207999	-0.884793
CBV_PAM70230_c1_g1_i1	0.783615	0.427049	-0.757765	-0.452899
CBV_PAM37849_c2_g1_i1	0.972202	0.0878153	-0.361284	-0.698733
CBV_PAM12887_c1_g1_i1	0.901458	0.230256	-0.393017	-0.738697
CBV_PAM27174_c0_g1_i1	0.895775	0.17841	-0.259092	-0.815093
CBV_PAM70206_c0_g1_i1	0.84976	0.274294	-0.307767	-0.816287
CBV_PAM64165_c0_g1_i1	0.869132	0.166137	-0.172189	-0.86308
CBV_PAM14445_c0_g1_i1	0.826085	0.376441	-0.532493	-0.670033
CBV_PAM51513_c1_g1_i1	0.976541	0.0748506	-0.377364	-0.674028
CBV_PAM54420_c1_g1_i1	0.485256	0.618682	-0.147281	-0.956658
CBV_PAM69423_c0_g1_i1	0.983379	0.0235697	-0.302824	-0.704125
CBV_PAM25609_c0_g1_i1	0.898194	0.185372	-0.293714	-0.789852
CBV_PAM64772_c2_g1_i1	0.720289	0.429956	-0.277283	-0.872962
CBV_PAM37381_c0_g1_i1	0.572034	0.562165	-0.213908	-0.920291
CBV_PAM3253_c0_g1_i1	0.786035	0.426231	-0.63407	-0.578197
CBV_PAM28300_c0_g1_i1	0.801939	0.262408	-0.180999	-0.883348
CBV_PAM54341_c0_g2_i1	0.900344	0.227566	-0.485667	-0.642243
CBV_PAM39475_c0_g1_i1	0.738472	0.465684	-0.49963	-0.704526
CBV_PAM14239_c0_g1_i1	0.788511	0.408932	-0.566912	-0.630532
CBV_PAM65633_c0_g1_i1	0.779742	0.228604	-0.0946597	-0.913686
CBV_PAM74702_c0_g1_i1	0.917562	0.122926	-0.291264	-0.749224
CBV_PAM65178_c0_g1_i1	0.936251	0.112657	-0.349698	-0.699209
CBV_PAM64142_c0_g1_i1	0.873272	0.232115	-0.36828	-0.737107
CBV_PAM54556_c0_g1_i1	0.749451	0.422602	-0.409651	-0.762402
CBV_PAM24414_c0_g1_i1	0.90518	0.203991	-0.500793	-0.608378
CBV_PAM11038_c0_g1_i1	0.917464	0.0832451	-0.24514	-0.755569
CBV_PAM55586_c0_g1_i1	0.951062	0.0413364	-0.29536	-0.697038
CBV_PAM1972_c0_g1_i1	0.928578	0.0704999	-0.271811	-0.727267
CBV_PAM12673_c0_g1_i1	0.800172	0.259409	-0.241006	-0.818575
CBV_PAM65947_c0_g1_i1	0.679121	0.506983	-0.55115	-0.634954
CBV_PAM74732_c0_g1_i1	0.907403	0.0986452	-0.31864	-0.687408
CBV_PAM39454_c0_g1_i1	0.719619	0.356825	-0.236337	-0.840107
CBV_PAM68305_c0_g1_i1	0.813668	0.29849	-0.424042	-0.688116
CBV_PAM19772_c0_g1_i1	0.888663	0.130524	-0.314692	-0.704496
CBV_PAM54226_c0_g1_i1	0.898315	0.132531	-0.368141	-0.662706
CBV_PAM12201_c0_g1_i1	0.926869	0.0757889	-0.376267	-0.626391
CBV_PAM67486_c0_g1_i1	0.821796	0.273513	-0.402815	-0.692493
CBV_PAM28352_c0_g1_i1	0.926409	-0.0169341	-0.210167	-0.699308
CBV_PAM4251_c0_g1_i1	0.810745	0.302519	-0.450111	-0.663153
CBV_PAM4959_c0_g1_i1	0.838235	0.25198	-0.42275	-0.667465
CBV_PAM25448_c0_g1_i1	0.910923	0.107767	-0.390153	-0.628538
CBV_PAM53109_c0_g1_i1	0.740035	0.382714	-0.3926	-0.730149
CBV_PAM14788_c0_g1_i1	0.79072	0.340067	-0.571941	-0.558846
CBV_PAM10591_c0_g1_i2	0.791524	0.270704	-0.292455	-0.769773
CBV_PAM43168_c0_g1_i1	0.817588	0.292426	-0.494101	-0.615913
CBV_PAM46553_c0_g1_i1	0.852739	0.186213	-0.325056	-0.713896
CBV_PAM27527_c0_g1_i1	0.78015	0.341525	-0.494316	-0.627359
CBV_PAM39212_c0_g1_i1	0.592093	0.296683	0.0663576	-0.955134
CBV_PAM70053_c0_g1_i1	0.759462	0.357919	-0.448034	-0.669347
CBV_PAM15560_c0_g1_i1	0.795774	0.240032	-0.270831	-0.764975
CBV_PAM67278_c0_g1_i1	0.849694	0.179466	-0.335442	-0.693719
CBV_PAM26724_c0_g1_i1	0.717762	0.321019	-0.211751	-0.82703
CBV_PAM15140_c0_g1_i1	0.720376	0.309339	-0.199108	-0.830606
CBV_PAM53700_c0_g1_i1	0.520993	0.587639	-0.338768	-0.769864
CBV_PAM63741_c0_g1_i1	0.795357	0.257456	-0.341769	-0.711045
CBV_PAM72066_c0_g1_i1	0.793698	0.282409	-0.414967	-0.661141
CBV_PAM6574_c0_g1_i1	0.653333	0.480903	-0.485152	-0.649084
CBV_PAM54631_c0_g1_i1	0.785068	0.296055	-0.428343	-0.65278
CBV_PAM2016_c0_g1_i1	0.654753	0.372984	-0.184242	-0.843496
CBV_PAM24969_c0_g1_i1	0.716359	0.402101	-0.597456	-0.521005
CBV_PAM2463_c0_g1_i1	0.679023	0.432122	-0.423065	-0.68808
CBV_PAM37295_c0_g1_i1	0.76233	0.330468	-0.509186	-0.583612
CBV_PAM69098_c0_g1_i1	0.584966	0.481535	-0.268031	-0.79847
CBV_PAM52405_c0_g1_i1	0.783422	0.248181	-0.344396	-0.687208
CBV_PAM57177_c0_g1_i1	0.654904	0.417582	-0.33155	-0.740936
CBV_PAM11946_c0_g1_i1	0.857666	0.132351	-0.408231	-0.581787
CBV_PAM26713_c0_g1_i1	0.505454	0.522225	-0.201356	-0.826323
CBV_PAM32015_c0_g1_i1	0.742923	0.230454	-0.192981	-0.780396
CBV_PAM44334_c0_g1_i1	0.739737	0.328834	-0.44712	-0.621451
CBV_PAM5488_c0_g1_i1	0.682005	0.300359	-0.17301	-0.809354
CBV_PAM68062_c0_g1_i1	0.818589	0.190084	-0.401418	-0.607256
CBV_PAM15151_c0_g1_i1	0.788111	0.224344	-0.349953	-0.662501
CBV_PAM41358_c0_g1_i1	0.635522	0.446275	-0.42782	-0.653976
CBV_PAM38116_c0_g1_i1	0.601714	0.411347	-0.239863	-0.773199
CBV_PAM55989_c0_g1_i1	0.652292	0.350707	-0.242009	-0.76099
CBV_PAM3293_c0_g1_i1	0.626377	0.419538	-0.375546	-0.670369
CBV_PAM10202_c3_g1_i1	0.7071	0.329106	-0.452724	-0.583482
CBV_PAM158_c0_g1_i1	0.692827	0.352965	-0.529106	-0.516687
CBV_PAM12138_c0_g1_i1	0.521431	0.476605	-0.249872	-0.748163
CBV_PAM30144_c0_g1_i1	0.587861	0.439626	-0.368175	-0.659311

## Sheet: Subcluster8
Additional file 6. Expression subcluster matrix. Values of Trinity gene expression (TPM-TMM) for 15 subclusters identified by gene expression cluster analysis during fruit developmental stages (150, 240, 300 and 390 days after fruit set; DAFS) in Persea americana cv. Hass.
Trinity genes	150-DAFS	240-DAFS	300-DAFS	390-DAFS
CBV_PAM26039_c0_g1_i1	-0.663985	2.9308	-0.643976	-1.62284
CBV_PAM56400_c0_g1_i1	-1.35196	2.34032	-1.35196	0.363605
CBV_PAM10707_c0_g1_i1	0.578169	2.0751	-1.32663	-1.32663
CBV_PAM26040_c0_g1_i1	-0.954977	2.37991	-0.469953	-0.954977
CBV_PAM51220_c0_g1_i1	-0.19771	2.2529	-0.660053	-1.39514
CBV_PAM51888_c0_g1_i1	-0.565667	2.19463	-0.372319	-1.25665
CBV_PAM54290_c0_g1_i1	-0.79483	2.24382	-0.626594	-0.822397
CBV_PAM50972_c1_g11_i1	-0.727594	2.18278	-0.727594	-0.727594
CBV_PAM10624_c0_g1_i1	-0.167085	2.05693	-0.607627	-1.28222
CBV_PAM5243_c0_g1_i1	-1.10038	1.90564	0.00976658	-0.81502
CBV_PAM258_c0_g1_i1	-0.598069	1.98224	-0.476011	-0.908157
CBV_PAM12011_c0_g4_i1	0.735803	1.35643	-1.45898	-0.633253
CBV_PAM41129_c0_g1_i1	-1.14801	1.80017	-0.150359	-0.501797
CBV_PAM39795_c0_g1_i1	0.116269	1.64064	-0.493978	-1.26293
CBV_PAM12777_c0_g1_i1	-1.28207	1.65252	-0.337099	-0.0333503
CBV_PAM52955_c0_g3_i1	-0.611386	1.83416	-0.611386	-0.611386
CBV_PAM52470_c0_g1_i1	0.46411	1.37926	-0.376338	-1.46703
CBV_PAM43488_c0_g1_i1	-0.158242	1.75965	-0.819935	-0.781472
CBV_PAM64663_c0_g2_i1	-0.107251	1.52169	0.0168756	-1.43132
CBV_PAM39465_c1_g4_i1	-1.00253	1.55148	0.327421	-0.876364
CBV_PAM15010_c0_g1_i1	0.308384	1.53375	-0.654891	-1.18724
CBV_PAM7517_c0_g1_i1	-0.749726	1.75904	-0.259582	-0.749726
CBV_PAM37407_c0_g3_i1	0.326213	1.55215	-0.939181	-0.939181
CBV_PAM14171_c0_g1_i1	0.208681	1.31918	0.015354	-1.54321
CBV_PAM52348_c1_g1_i1	-0.954636	1.6405	-0.0354514	-0.650411
CBV_PAM65385_c0_g1_i1	0.384563	1.46307	-0.923819	-0.923819
CBV_PAM37769_c0_g1_i1	-0.620153	1.605	0.0304954	-1.01534
CBV_PAM43024_c0_g1_i1	-0.848869	1.51796	-0.848869	0.179776
CBV_PAM37646_c0_g2_i1	-0.413036	1.18363	-1.35623	0.585634
CBV_PAM46356_c0_g1_i1	-0.287463	1.60381	-0.474221	-0.842124
CBV_PAM37250_c0_g1_i1	0.595171	1.22754	-1.07858	-0.74413
CBV_PAM64486_c0_g1_i1	-0.541703	1.62511	-0.541703	-0.541703
CBV_PAM66067_c1_g1_i1	0.19085	1.17487	0.0760466	-1.44177
CBV_PAM1866_c0_g1_i1	0.17319	1.25753	-0.0599605	-1.37076
CBV_PAM58651_c0_g1_i1	-0.509998	1.59539	-0.327116	-0.758281
CBV_PAM54192_c1_g1_i1	-0.312118	1.37192	0.144359	-1.20416
CBV_PAM50840_c0_g1_i1	-0.173069	1.51621	-0.341823	-1.00132
CBV_PAM38509_c0_g2_i1	0.516502	1.13106	-0.305381	-1.34219
CBV_PAM10241_c0_g1_i1	-0.215218	1.50945	-0.94257	-0.35166
CBV_PAM38196_c1_g2_i1	-0.0800058	1.50999	-0.714994	-0.714994
CBV_PAM10930_c0_g4_i1	0.702775	0.998762	-1.22015	-0.481385
CBV_PAM71489_c0_g2_i1	0.0862794	1.42971	-0.757992	-0.757992
CBV_PAM2657_c0_g1_i1	-0.818296	1.48511	-0.53363	-0.133181
CBV_PAM40188_c0_g7_i1	-0.514546	1.54364	-0.514546	-0.514546
CBV_PAM46362_c0_g1_i1	-0.702363	1.29847	0.336006	-0.932114
CBV_PAM3275_c1_g1_i1	0.257595	1.02399	0.123451	-1.40504
CBV_PAM39396_c2_g1_i1	0.190815	1.35867	-0.796821	-0.752666
CBV_PAM26847_c0_g1_i1	0.41054	1.1029	-0.23465	-1.27879
CBV_PAM64308_c1_g1_i1	-0.374308	1.40427	-0.0533318	-0.976632
CBV_PAM46670_c0_g3_i1	-0.771982	1.35565	0.188312	-0.771982
CBV_PAM57533_c0_g3_i1	-0.169326	1.3175	-0.0213739	-1.1268
CBV_PAM6628_c0_g1_i1	0.058674	1.18426	0.0178094	-1.26074
CBV_PAM74641_c0_g9_i1	-0.685988	1.41218	-0.685988	-0.0402067
CBV_PAM11499_c0_g1_i1	0.478893	0.968525	-0.144242	-1.30318
CBV_PAM52797_c0_g1_i1	0.436118	1.16977	-0.849144	-0.756744
CBV_PAM65669_c1_g1_i1	-0.261453	1.39751	-0.274906	-0.861149
CBV_PAM46061_c0_g1_i1	0.398303	1.04902	-0.224499	-1.22282
CBV_PAM1248_c1_g1_i1	0.61206	1.03365	-0.876757	-0.768952
CBV_PAM972_c0_g5_i1	0.195297	1.21686	-0.35583	-1.05633
CBV_PAM64850_c1_g1_i1	0.0782951	1.08991	-1.23588	0.067668
CBV_PAM37713_c0_g1_i1	-0.309371	1.25135	-1.02089	0.0789094
CBV_PAM71767_c0_g1_i1	-0.327625	1.41205	-0.442493	-0.641928
CBV_PAM4886_c0_g1_i1	0.300005	1.046	-0.123551	-1.22245
CBV_PAM67028_c0_g1_i1	0.0173283	1.26567	-0.280828	-1.00217
CBV_PAM1128_c0_g1_i1	0.54569	0.99262	-0.446777	-1.09153
CBV_PAM11828_c0_g1_i1	0.392972	1.13916	-0.631379	-0.900748
CBV_PAM43070_c0_g1_i1	-0.0997156	1.22406	-0.0586661	-1.06568
CBV_PAM52348_c0_g1_i1	-0.911356	1.28747	0.0111253	-0.387238
CBV_PAM14771_c0_g1_i1	0.354204	1.16267	-0.750574	-0.766299
CBV_PAM52470_c1_g2_i1	0.294464	1.0454	-0.162841	-1.17702
CBV_PAM30014_c0_g1_i1	-0.761397	1.16075	-0.731472	0.332124
CBV_PAM7176_c0_g1_i1	0.210962	1.13396	-0.269642	-1.07528
CBV_PAM3694_c0_g1_i1	0.307814	1.14623	-0.544465	-0.909583
CBV_PAM52021_c1_g1_i1	0.269161	1.08801	-0.264721	-1.09245
CBV_PAM27132_c0_g1_i1	-0.293271	1.34597	-0.346892	-0.705811
CBV_PAM42524_c0_g1_i1	0.418233	1.08363	-0.877101	-0.62476
CBV_PAM41317_c0_g4_i1	-0.91143	1.17115	0.233311	-0.49303
CBV_PAM68743_c0_g1_i1	0.279844	1.14481	-0.926122	-0.49853
CBV_PAM67051_c0_g1_i1	0.204039	1.19224	-0.859991	-0.536289
CBV_PAM54785_c0_g1_i1	0.670378	0.891117	-0.756761	-0.804734
CBV_PAM21939_c0_g1_i1	-0.663438	1.33757	-0.301846	-0.372289
CBV_PAM65303_c0_g1_i1	0.288014	0.945087	-0.0206469	-1.21245
CBV_PAM67473_c0_g1_i1	0.546917	0.948543	-0.500127	-0.995334
CBV_PAM53530_c0_g1_i1	-0.144436	1.30974	-0.561253	-0.604051
CBV_PAM1308_c0_g3_i1	0.363716	0.721253	-1.30872	0.22375
CBV_PAM11139_c0_g1_i1	0.540171	0.93691	-0.46081	-1.01627
CBV_PAM12836_c0_g1_i1	0.423827	1.03094	-0.491889	-0.962873
CBV_PAM52810_c1_g1_i1	0.454551	1.02602	-0.594453	-0.886118
CBV_PAM16992_c0_g1_i1	0.221706	1.16489	-0.682432	-0.704167
CBV_PAM65345_c0_g1_i1	0.618461	0.645165	-1.25175	-0.0118727
CBV_PAM14649_c0_g1_i1	0.354426	0.854682	-0.000102375	-1.209
CBV_PAM52131_c1_g1_i1	-0.6912	1.11996	-0.710685	0.281922
CBV_PAM20039_c0_g1_i1	0.680509	0.826834	-0.863958	-0.643385
CBV_PAM53467_c0_g1_i1	-0.523507	1.21284	-0.741162	0.0518266
CBV_PAM37791_c1_g1_i1	0.515974	0.964938	-0.72806	-0.752852
CBV_PAM37203_c2_g1_i1	0.104136	1.15057	-0.919546	-0.335157
CBV_PAM10198_c3_g1_i1	0.586861	0.909561	-0.752189	-0.744233
CBV_PAM9384_c0_g1_i1	-0.322984	1.26428	-0.201813	-0.739487
CBV_PAM55353_c0_g1_i1	0.152581	1.08316	-1.00992	-0.225819
CBV_PAM64887_c0_g1_i1	0.420245	0.980342	-0.967478	-0.433109
CBV_PAM4861_c0_g1_i1	0.588919	0.846799	-1.0011	-0.434617
CBV_PAM65511_c0_g1_i1	-0.43284	1.29852	-0.43284	-0.43284
CBV_PAM2513_c0_g4_i1	-0.0916021	1.2509	-0.579651	-0.579651
CBV_PAM40938_c0_g1_i1	0.256843	1.03722	-0.282353	-1.01171
CBV_PAM10625_c0_g4_i1	0.0369473	1.03576	0.00884823	-1.08155
CBV_PAM856_c2_g1_i1	0.123964	0.937526	0.092851	-1.15434
CBV_PAM43934_c0_g1_i1	-0.247755	1.10278	0.114033	-0.96906
CBV_PAM10655_c2_g2_i1	0.0304375	1.01981	-1.08408	0.0338365
CBV_PAM59478_c0_g1_i1	0.603843	0.863392	-0.609597	-0.857639
CBV_PAM2274_c1_g1_i1	0.57542	0.777974	-1.09763	-0.25576
CBV_PAM41788_c0_g1_i1	0.495131	0.863401	-0.29945	-1.05908
CBV_PAM35379_c0_g1_i1	-0.176095	1.24971	-0.458702	-0.614914
CBV_PAM28402_c1_g1_i1	0.147831	1.14058	-0.535316	-0.75309
CBV_PAM10516_c0_g1_i1	0.243113	1.04963	-0.358802	-0.933943
CBV_PAM44857_c0_g1_i1	-0.102661	1.22434	-0.479778	-0.641905
CBV_PAM972_c0_g16_i1	-0.421788	1.26536	-0.421788	-0.421788
CBV_PAM14639_c0_g1_i1	0.200452	0.845097	0.119451	-1.165
CBV_PAM57479_c0_g1_i1	-0.670835	1.20569	-0.0942384	-0.440612
CBV_PAM55445_c0_g2_i1	-0.130343	1.1055	-0.0507736	-0.924381
CBV_PAM7816_c0_g1_i1	-0.734736	1.11197	0.158398	-0.535636
CBV_PAM76240_c0_g1_i1	0.0259343	1.1667	-0.665429	-0.527203
CBV_PAM38212_c0_g9_i1	-0.618313	1.14397	0.0926557	-0.618313
CBV_PAM16769_c0_g1_i1	-0.234976	1.13723	-0.0487546	-0.853501
CBV_PAM41060_c0_g1_i1	0.460871	0.800926	-0.168409	-1.09339
CBV_PAM16871_c0_g1_i1	-0.0206773	1.14327	-0.299189	-0.823406
CBV_PAM20563_c0_g1_i1	0.393255	0.975555	-0.565896	-0.802914
CBV_PAM30818_c0_g1_i1	-0.194211	1.05242	-0.955414	0.097206
CBV_PAM42622_c0_g1_i1	-0.353982	1.19176	-0.138356	-0.699419
CBV_PAM15311_c0_g1_i1	0.556707	0.843953	-0.847028	-0.553632
CBV_PAM13162_c0_g3_i1	-0.594531	1.15028	0.0387851	-0.594531
CBV_PAM65381_c0_g6_i1	0.540194	0.83149	-0.459421	-0.912263
CBV_PAM29644_c0_g1_i1	-0.411867	1.1903	-0.637212	-0.141223
CBV_PAM14059_c0_g2_i1	-0.409258	1.22777	-0.409258	-0.409258
CBV_PAM3427_c0_g1_i1	0.28776	0.962011	-0.302007	-0.947765
CBV_PAM69434_c0_g1_i1	0.524671	0.844759	-0.503433	-0.865997
CBV_PAM65431_c2_g1_i1	0.332179	0.938119	-0.947333	-0.322964
CBV_PAM12459_c0_g1_i1	0.544292	0.724963	-1.05973	-0.209529
CBV_PAM36298_c0_g1_i1	-0.345932	1.06719	-0.844917	0.123662
CBV_PAM3777_c0_g1_i1	-0.033674	1.12795	-0.774806	-0.319472
CBV_PAM37278_c0_g1_i1	0.546097	0.837838	-0.597936	-0.785998
CBV_PAM804_c1_g1_i1	0.194969	0.792859	0.144399	-1.13223
CBV_PAM39154_c0_g1_i1	0.543728	0.841387	-0.674685	-0.710431
CBV_PAM10708_c0_g1_i1	0.582769	0.783075	-0.8606	-0.505244
CBV_PAM28870_c0_g1_i1	-0.29751	1.15109	-0.141101	-0.712477
CBV_PAM28610_c0_g1_i1	0.447629	0.906995	-0.681022	-0.673602
CBV_PAM38411_c0_g1_i1	0.407168	0.864285	-0.959506	-0.311947
CBV_PAM39426_c0_g2_i1	0.60046	0.688092	-1.00099	-0.287563
CBV_PAM30500_c0_g1_i1	0.235873	1.02287	-0.73983	-0.518909
CBV_PAM61338_c0_g1_i1	-0.259033	1.18015	-0.355955	-0.565157
CBV_PAM52078_c0_g3_i1	0.179222	0.925925	-1.00157	-0.103576
CBV_PAM50997_c0_g1_i1	0.0834114	1.07562	-0.744004	-0.415032
CBV_PAM35139_c0_g1_i1	0.303426	0.974347	-0.530418	-0.747355
CBV_PAM64561_c0_g1_i1	0.557957	0.775177	-0.856549	-0.476585
CBV_PAM66815_c0_g1_i1	0.42849	0.805564	-0.98706	-0.246995
CBV_PAM15950_c0_g1_i1	0.357142	0.715612	0.0346248	-1.10738
CBV_PAM46014_c0_g1_i1	-0.250834	1.12967	-0.173538	-0.705296
CBV_PAM24405_c1_g1_i1	-0.533546	1.17333	-0.334854	-0.304932
CBV_PAM28551_c0_g1_i1	0.432963	0.726804	-1.06327	-0.0964958
CBV_PAM55432_c0_g1_i1	-0.345514	1.05138	0.079763	-0.785632
CBV_PAM52001_c0_g1_i1	-0.138509	1.09236	-0.176498	-0.777357
CBV_PAM55249_c0_g1_i1	-0.397739	1.17588	-0.392825	-0.385319
CBV_PAM1219_c0_g1_i1	-0.0333161	1.11326	-0.447338	-0.632606
CBV_PAM46196_c0_g1_i1	0.487168	0.81362	-0.451938	-0.848851
CBV_PAM15715_c0_g1_i1	0.0162979	0.857986	0.149523	-1.02381
CBV_PAM12940_c2_g1_i1	0.168959	0.898851	-0.0872711	-0.98054
CBV_PAM16301_c0_g1_i1	-0.552064	1.08953	0.0146013	-0.552064
CBV_PAM47537_c0_g1_i1	0.24881	0.848272	-1.0007	-0.0963804
CBV_PAM64495_c0_g1_i1	0.0559287	0.993417	-0.871987	-0.177359
CBV_PAM8079_c0_g1_i1	-0.314608	1.07484	-0.0487175	-0.711515
CBV_PAM54960_c2_g1_i1	0.236323	0.843042	-0.991423	-0.0879412
CBV_PAM3898_c0_g1_i1	0.119072	1.03672	-0.579584	-0.576204
CBV_PAM1199_c2_g1_i1	-0.431458	1.06368	0.0281471	-0.660365
CBV_PAM3854_c0_g1_i1	0.376906	0.893169	-0.603089	-0.666986
CBV_PAM10839_c0_g1_i1	-0.593524	0.998678	0.18837	-0.593524
CBV_PAM56085_c0_g1_i1	0.181483	0.950002	-0.294657	-0.836828
CBV_PAM11382_c0_g1_i1	0.364476	0.72353	-1.02847	-0.0595381
CBV_PAM11006_c0_g4_i1	0.0301905	0.870829	-0.974895	0.0738752
CBV_PAM38436_c0_g1_i1	-0.616731	1.06368	-0.448744	0.00179123
CBV_PAM12531_c1_g1_i1	-0.519598	1.01772	0.126352	-0.624476
CBV_PAM10757_c2_g1_i1	0.482084	0.776628	-0.427905	-0.830808
CBV_PAM68868_c0_g1_i1	-0.372594	1.02568	0.0636317	-0.716719
CBV_PAM972_c0_g14_i1	0.169808	0.99766	-0.583734	-0.583734
CBV_PAM26318_c0_g1_i1	-0.776629	0.993652	-0.320015	0.102992
CBV_PAM16540_c0_g1_i1	0.314882	0.917336	-0.616109	-0.616109
CBV_PAM12823_c1_g1_i1	0.0616904	0.909173	-0.922157	-0.0487069
CBV_PAM29322_c0_g1_i1	0.213375	0.948952	-0.413206	-0.749121
CBV_PAM673_c2_g1_i1	0.433481	0.829434	-0.67546	-0.587454
CBV_PAM53265_c0_g1_i1	0.281931	0.68832	0.0784035	-1.04865
CBV_PAM69257_c0_g1_i1	-0.145019	1.06575	-0.264677	-0.656051
CBV_PAM972_c0_g7_i1	-0.592209	0.938796	-0.592209	0.245621
CBV_PAM67713_c0_g1_i1	-0.152426	0.884283	0.166122	-0.897979
CBV_PAM37521_c0_g1_i1	0.532021	0.685524	-0.877782	-0.339763
CBV_PAM45896_c0_g3_i1	-0.0764167	0.932666	0.010315	-0.866564
CBV_PAM40879_c0_g1_i1	0.258868	0.889224	-0.343384	-0.804708
CBV_PAM26288_c0_g1_i1	0.175835	0.787193	-0.985657	0.0226296
CBV_PAM64762_c0_g1_i1	0.62511	0.636077	-0.734146	-0.527041
CBV_PAM3461_c0_g1_i1	0.435039	0.767454	-0.832617	-0.369876
CBV_PAM16730_c1_g1_i1	0.450132	0.764955	-0.41431	-0.800776
CBV_PAM45884_c0_g1_i1	-0.0063239	1.02571	-0.630047	-0.389335
CBV_PAM52470_c1_g1_i1	0.00417823	0.913483	-0.0437356	-0.873926
CBV_PAM40460_c0_g1_i1	0.557285	0.701277	-0.681898	-0.576665
CBV_PAM10724_c1_g1_i1	-0.0945038	0.804648	0.228664	-0.938809
CBV_PAM4099_c0_g1_i1	-0.282141	1.08408	-0.33059	-0.471348
CBV_PAM5397_c0_g1_i1	-0.399501	0.990579	-0.662022	0.0709449
CBV_PAM67830_c0_g1_i1	0.08364	0.97425	-0.713518	-0.344371
CBV_PAM2690_c0_g1_i1	0.116274	0.97297	-0.432438	-0.656806
CBV_PAM26087_c0_g1_i1	0.246349	0.91069	-0.67215	-0.484889
CBV_PAM73221_c0_g1_i1	0.423615	0.781198	-0.772864	-0.431949
CBV_PAM72331_c0_g1_i1	0.265196	0.848768	-0.27545	-0.838513
CBV_PAM66026_c0_g1_i1	0.103947	0.747594	0.137533	-0.989074
CBV_PAM11597_c0_g1_i1	0.622277	0.619293	-0.725741	-0.515828
CBV_PAM29806_c0_g1_i1	-0.707551	1.00431	-0.211651	-0.0851117
CBV_PAM52721_c0_g1_i1	0.409541	0.765209	-0.8264	-0.34835
CBV_PAM68958_c0_g1_i1	0.190566	0.935306	-0.484571	-0.641301
CBV_PAM42210_c0_g1_i1	0.389439	0.817807	-0.624456	-0.58279
CBV_PAM8639_c0_g1_i1	0.109884	0.715158	0.172363	-0.997404
CBV_PAM70962_c0_g1_i1	0.15331	0.76043	0.0556534	-0.969393
CBV_PAM53370_c0_g2_i1	-0.534278	0.981523	-0.534278	0.0870343
CBV_PAM12791_c0_g1_i1	0.284553	0.587874	-1.04211	0.169682
CBV_PAM38821_c0_g1_i1	0.588216	0.650368	-0.661317	-0.577267
CBV_PAM1029_c0_g2_i1	-0.015085	1.01786	-0.501387	-0.501387
CBV_PAM972_c0_g13_i1	0.575499	0.662955	-0.619227	-0.619227
CBV_PAM52562_c0_g1_i1	0.48007	0.737764	-0.506646	-0.711188
CBV_PAM73460_c0_g1_i1	-0.0739745	0.754468	0.261128	-0.941621
CBV_PAM65392_c0_g1_i1	0.090327	0.782977	-0.949175	0.0758711
CBV_PAM38087_c0_g1_i1	0.156392	0.943109	-0.497684	-0.601817
CBV_PAM32517_c0_g1_i1	-0.017421	0.981804	-0.266486	-0.697898
CBV_PAM13209_c1_g3_i1	-0.344394	0.892552	0.200736	-0.748895
CBV_PAM41403_c0_g1_i1	0.275216	0.754067	-0.928356	-0.100927
CBV_PAM51692_c0_g1_i1	0.501338	0.675843	-0.351137	-0.826045
CBV_PAM24877_c0_g1_i1	0.437789	0.593659	-0.981593	-0.0498559
CBV_PAM4381_c0_g1_i1	0.692089	0.524148	-0.639298	-0.576939
CBV_PAM354_c0_g1_i1	-0.608561	0.972159	0.0555913	-0.419189
CBV_PAM18296_c0_g1_i1	0.163901	0.879232	-0.253103	-0.79003
CBV_PAM52605_c0_g3_i1	-0.152674	1.03556	-0.441445	-0.441445
CBV_PAM66492_c2_g1_i1	0.540428	0.650595	-0.428589	-0.762434
CBV_PAM40849_c0_g1_i1	0.256473	0.860057	-0.713013	-0.403517
CBV_PAM11827_c0_g1_i1	0.454997	0.693703	-0.325128	-0.823572
CBV_PAM68398_c0_g1_i1	0.0889488	0.923983	-0.286048	-0.726885
CBV_PAM66846_c0_g1_i1	0.137015	0.767367	-0.928548	0.0241654
CBV_PAM66890_c0_g1_i1	0.467135	0.703403	-0.396186	-0.774352
CBV_PAM16475_c0_g1_i1	0.451487	0.714282	-0.777767	-0.388002
CBV_PAM66745_c1_g1_i1	-0.243193	0.894787	0.119354	-0.770948
CBV_PAM39797_c0_g1_i1	0.00298741	0.975357	-0.351741	-0.626603
CBV_PAM65192_c0_g4_i1	0.217869	0.795784	-0.138761	-0.874892
CBV_PAM54185_c0_g1_i1	0.486807	0.697499	-0.733954	-0.450352
CBV_PAM3684_c0_g1_i1	0.302495	0.840879	-0.644734	-0.49864
CBV_PAM12771_c0_g1_i1	0.217451	0.879311	-0.680771	-0.41599
CBV_PAM25620_c0_g1_i1	0.497582	0.659139	-0.356865	-0.799857
CBV_PAM3333_c0_g1_i1	-0.0869234	0.998766	-0.570386	-0.341457
CBV_PAM42230_c0_g1_i1	-0.492999	0.940311	0.106496	-0.553808
CBV_PAM4060_c0_g1_i1	0.0209753	0.963569	-0.370159	-0.614385
CBV_PAM12111_c1_g1_i1	0.117787	0.931413	-0.581149	-0.46805
CBV_PAM855_c0_g1_i1	0.497598	0.66246	-0.391559	-0.768499
CBV_PAM69198_c0_g1_i1	0.26273	0.698332	-0.0297023	-0.93136
CBV_PAM27530_c2_g1_i1	0.28106	0.764443	-0.194943	-0.850559
CBV_PAM10886_c1_g1_i1	0.56134	0.606667	-0.417145	-0.750862
CBV_PAM53055_c1_g1_i1	0.455418	0.619906	-0.183653	-0.891671
CBV_PAM52386_c0_g2_i1	-0.338306	0.763599	-0.774466	0.349174
CBV_PAM4072_c0_g1_i1	0.249582	0.7512	-0.119177	-0.881605
CBV_PAM66219_c1_g1_i1	-0.123705	0.927509	-0.0724025	-0.731401
CBV_PAM917_c1_g1_i1	0.0359067	0.707454	0.191752	-0.935112
CBV_PAM14158_c1_g1_i1	0.466748	0.627584	-0.231504	-0.862828
CBV_PAM12496_c1_g1_i1	0.207014	0.828283	-0.786069	-0.249229
CBV_PAM67710_c0_g1_i1	0.0410342	0.90588	-0.213501	-0.733413
CBV_PAM69615_c0_g1_i1	0.235929	0.802986	-0.235306	-0.80361
CBV_PAM35516_c0_g1_i1	0.473883	0.690052	-0.479362	-0.684573
CBV_PAM71713_c0_g1_i1	0.0349205	0.947571	-0.398782	-0.583709
CBV_PAM41077_c0_g1_i1	0.359237	0.732162	-0.293001	-0.798399
CBV_PAM26093_c0_g1_i1	0.455279	0.609573	-0.184906	-0.879945
CBV_PAM52156_c1_g1_i1	-0.0640933	0.786971	0.138166	-0.861044
CBV_PAM38498_c0_g1_i1	0.404754	0.654158	-0.198136	-0.860775
CBV_PAM54768_c0_g1_i1	0.05963	0.930447	-0.566011	-0.424066
CBV_PAM40726_c1_g1_i1	-0.0367844	0.965938	-0.426397	-0.502757
CBV_PAM66183_c0_g1_i1	0.0809092	0.923838	-0.481053	-0.523694
CBV_PAM38918_c0_g5_i1	0.0629179	0.895767	-0.696274	-0.262411
CBV_PAM51502_c1_g1_i1	0.292129	0.812708	-0.540904	-0.563934
CBV_PAM42783_c0_g1_i1	-0.231964	0.879257	0.0751779	-0.722471
CBV_PAM46347_c0_g1_i1	0.150632	0.791758	-0.113134	-0.829256
CBV_PAM7698_c0_g1_i1	0.221038	0.828108	-0.359381	-0.689764
CBV_PAM37926_c2_g1_i1	0.548842	0.565911	-0.774842	-0.339912
CBV_PAM25464_c0_g1_i1	0.386115	0.679475	-0.251203	-0.814387
CBV_PAM73293_c0_g1_i1	-0.528468	0.971042	-0.282165	-0.160409
CBV_PAM68416_c0_g1_i1	0.0471167	0.850176	-0.132499	-0.764794
CBV_PAM13203_c0_g2_i1	0.0841042	0.904124	-0.494114	-0.494114
CBV_PAM37521_c1_g1_i1	0.357961	0.672496	-0.828148	-0.202309
CBV_PAM42242_c0_g1_i1	-0.177788	0.974553	-0.36294	-0.433826
CBV_PAM30127_c0_g1_i1	0.301238	0.737312	-0.771692	-0.266859
CBV_PAM4213_c0_g1_i1	-0.232494	0.824724	0.145632	-0.737862
CBV_PAM26497_c0_g1_i1	0.170552	0.770691	-0.130531	-0.810712
CBV_PAM32265_c0_g1_i1	0.541191	0.569165	-0.376896	-0.733459
CBV_PAM23996_c1_g1_i1	0.414328	0.531373	-0.0293781	-0.916323
CBV_PAM25631_c0_g1_i1	0.457731	0.642674	-0.368987	-0.731418
CBV_PAM51388_c1_g1_i1	0.584271	0.54743	-0.503997	-0.627704
CBV_PAM15194_c0_g1_i1	-0.379067	0.766951	0.294521	-0.682404
CBV_PAM54897_c0_g1_i1	0.484508	0.635886	-0.653811	-0.466583
CBV_PAM55614_c0_g1_i1	0.424436	0.625501	-0.242617	-0.80732
CBV_PAM1865_c0_g1_i1	0.25046	0.674792	-0.0530902	-0.872162
CBV_PAM60102_c0_g1_i1	-0.288745	0.973845	-0.255832	-0.429268
CBV_PAM30472_c0_g1_i1	0.14973	0.852873	-0.621725	-0.380878
CBV_PAM54806_c0_g1_i1	-0.436127	0.852496	-0.576292	0.159923
CBV_PAM64458_c1_g1_i1	-0.365508	0.955903	-0.133721	-0.456673
CBV_PAM51093_c0_g1_i1	0.356631	0.727187	-0.427947	-0.655871
CBV_PAM56585_c0_g1_i1	-0.025317	0.927124	-0.456968	-0.444839
CBV_PAM5152_c0_g1_i1	0.0456595	0.820921	-0.10518	-0.7614
CBV_PAM37734_c1_g1_i1	0.0225521	0.894291	-0.308579	-0.608264
CBV_PAM52340_c0_g1_i1	-0.183463	0.962801	-0.412839	-0.366499
CBV_PAM45114_c0_g1_i1	0.351499	0.730521	-0.435505	-0.646516
CBV_PAM54873_c0_g1_i1	0.470801	0.499631	-0.883438	-0.0869936
CBV_PAM37964_c0_g1_i1	0.396108	0.692534	-0.65534	-0.433303
CBV_PAM19399_c0_g1_i1	0.0137848	0.88812	-0.617338	-0.284566
CBV_PAM15817_c0_g1_i1	0.0204208	0.866809	-0.668717	-0.218513
CBV_PAM24157_c0_g1_i1	0.228487	0.617313	0.0532494	-0.89905
CBV_PAM60058_c0_g1_i1	-0.344101	0.849884	0.117464	-0.623247
CBV_PAM64890_c0_g1_i1	0.44076	0.657819	-0.489643	-0.608936
CBV_PAM3658_c0_g1_i1	-0.243527	0.952309	-0.254102	-0.45468
CBV_PAM873_c1_g1_i1	0.609091	0.49072	-0.649573	-0.450239
CBV_PAM64631_c0_g1_i1	0.00726448	0.905425	-0.458018	-0.454671
CBV_PAM42363_c0_g1_i1	0.430068	0.6282	-0.309982	-0.748286
CBV_PAM20370_c0_g1_i1	-0.34684	0.877604	0.0502208	-0.580985
CBV_PAM15861_c0_g1_i1	0.112592	0.822464	-0.247843	-0.687213
CBV_PAM5574_c0_g1_i1	-0.246115	0.857867	0.035953	-0.647705
CBV_PAM2614_c0_g1_i1	-0.610428	0.858714	-0.31114	0.0628546
CBV_PAM26016_c0_g1_i1	-0.113261	0.927625	-0.388812	-0.425552
CBV_PAM14565_c0_g1_i1	-0.00383803	0.831387	-0.704919	-0.12263
CBV_PAM50923_c2_g1_i1	0.315276	0.736914	-0.487613	-0.564578
CBV_PAM24823_c0_g1_i1	0.112305	0.812732	-0.679204	-0.245833
CBV_PAM54531_c0_g1_i1	-0.426263	0.760624	-0.600778	0.266416
CBV_PAM67637_c0_g1_i1	0.615442	0.465958	-0.613541	-0.467859
CBV_PAM10439_c1_g7_i1	-0.513785	0.770757	-0.513785	0.256813
CBV_PAM18804_c1_g1_i1	0.337478	0.694141	-0.676475	-0.355143
CBV_PAM55187_c1_g1_i1	0.0489025	0.858584	-0.556576	-0.350911
CBV_PAM51492_c0_g1_i1	-0.668243	0.833671	0.00421848	-0.169647
CBV_PAM53417_c2_g1_i1	0.330815	0.706754	-0.418655	-0.618915
CBV_PAM24422_c0_g1_i1	0.276807	0.679803	-0.186983	-0.769628
CBV_PAM13947_c0_g1_i1	0.145212	0.546734	0.203284	-0.895231
CBV_PAM24233_c0_g1_i1	-0.123857	0.685997	0.228009	-0.79015
CBV_PAM69212_c0_g1_i1	0.147096	0.808791	-0.358645	-0.597242
CBV_PAM52512_c0_g1_i1	0.523739	0.552248	-0.508082	-0.567906
CBV_PAM15399_c0_g1_i1	0.172549	0.587671	0.116672	-0.876892
CBV_PAM37199_c0_g1_i1	0.289	0.672339	-0.198847	-0.762491
CBV_PAM70535_c0_g1_i1	0.127713	0.75521	-0.741076	-0.141847
CBV_PAM13252_c0_g1_i1	0.139026	0.60822	0.116981	-0.864228
CBV_PAM37852_c0_g1_i1	-0.148842	0.787917	0.0678452	-0.706921
CBV_PAM31809_c0_g1_i1	-0.193515	0.911977	-0.456987	-0.261475
CBV_PAM24792_c1_g2_i1	0.431346	0.599569	-0.334935	-0.69598
CBV_PAM66830_c1_g1_i1	-0.0240726	0.697851	0.124104	-0.797883
CBV_PAM27498_c0_g1_i1	0.0528423	0.830234	-0.277039	-0.606038
CBV_PAM23607_c1_g1_i1	-0.216313	0.814375	-0.642983	0.044922
CBV_PAM40457_c0_g1_i1	-0.243386	0.872385	-0.0846818	-0.544317
CBV_PAM59790_c0_g1_i1	0.49222	0.520884	-0.286662	-0.726441
CBV_PAM13969_c1_g1_i1	-0.0319554	0.872777	-0.433976	-0.406845
CBV_PAM41643_c0_g1_i1	0.347189	0.521788	-0.0186388	-0.850339
CBV_PAM37195_c0_g1_i1	0.173868	0.56098	-0.867474	0.132626
CBV_PAM38672_c0_g1_i1	0.504975	0.543939	-0.457139	-0.591774
CBV_PAM69443_c0_g1_i1	0.198349	0.698344	-0.74426	-0.152433
CBV_PAM56605_c0_g1_i1	0.273511	0.603473	-0.0673568	-0.809627
CBV_PAM856_c3_g1_i1	-0.383279	0.793376	-0.549937	0.13984
CBV_PAM51359_c0_g1_i1	-0.223993	0.894333	-0.437706	-0.232634
CBV_PAM40780_c0_g1_i1	-0.169009	0.861548	-0.548646	-0.143893
CBV_PAM69927_c1_g1_i1	-0.291359	0.898816	-0.386659	-0.220798
CBV_PAM54846_c0_g1_i1	0.120423	0.789302	-0.321235	-0.58849
CBV_PAM64912_c0_g1_i1	0.455435	0.537	-0.706672	-0.285763
CBV_PAM5734_c0_g1_i1	0.0772552	0.57007	-0.841435	0.19411
CBV_PAM52752_c0_g4_i1	-0.463601	0.792629	0.134572	-0.463601
CBV_PAM37325_c0_g1_i1	0.418089	0.609215	-0.52916	-0.498143
CBV_PAM37180_c0_g2_i1	-0.298437	0.895312	-0.298437	-0.298437
CBV_PAM66206_c0_g1_i1	-0.274642	0.738934	-0.643761	0.179468
CBV_PAM72984_c0_g1_i1	-0.0464458	0.844614	-0.502833	-0.295336
CBV_PAM44347_c0_g1_i1	-0.464854	0.805042	0.0840924	-0.42428
CBV_PAM4300_c0_g1_i1	0.160903	0.759627	-0.383695	-0.536835
CBV_PAM52129_c0_g1_i1	0.251742	0.711828	-0.519306	-0.444264
CBV_PAM1450_c1_g1_i1	0.379057	0.596063	-0.65223	-0.32289
CBV_PAM74448_c0_g1_i1	-0.0352798	0.826771	-0.275646	-0.515845
CBV_PAM41186_c0_g1_i1	0.213115	0.599888	-0.0255033	-0.7875
CBV_PAM51515_c1_g1_i1	-0.435668	0.788006	0.0948812	-0.447219
CBV_PAM39106_c0_g1_i1	0.153843	0.728793	-0.257481	-0.625155
CBV_PAM68026_c0_g1_i1	0.18991	0.735738	-0.410539	-0.515108
CBV_PAM53981_c1_g1_i1	0.351097	0.634098	-0.504415	-0.48078
CBV_PAM24153_c0_g1_i1	0.111709	0.716295	-0.148954	-0.67905
CBV_PAM23669_c0_g1_i1	0.0544317	0.744874	-0.655633	-0.143673
CBV_PAM30049_c0_g1_i1	0.222009	0.705348	-0.342844	-0.584514
CBV_PAM55776_c0_g1_i1	-0.128244	0.838386	-0.485916	-0.224226
CBV_PAM15412_c0_g1_i1	0.249911	0.688583	-0.588448	-0.350047
CBV_PAM40734_c0_g1_i1	-0.511413	0.81416	-0.278385	-0.0243628
CBV_PAM40255_c0_g1_i1	-0.161365	0.828773	-0.159859	-0.507549
CBV_PAM18689_c0_g1_i1	0.257602	0.652786	-0.244281	-0.666107
CBV_PAM11395_c0_g1_i1	-0.321091	0.810357	-0.00680813	-0.482458
CBV_PAM28325_c0_g1_i1	-0.34976	0.858776	-0.21791	-0.291106
CBV_PAM41460_c0_g1_i1	0.10846	0.733625	-0.219504	-0.622582
CBV_PAM14604_c0_g1_i1	0.287692	0.465237	-0.82356	0.0706306
CBV_PAM15232_c0_g1_i1	0.165242	0.591717	0.0147493	-0.771708
CBV_PAM45655_c0_g1_i1	0.269256	0.673797	-0.492352	-0.450701
CBV_PAM4542_c0_g1_i1	-0.385416	0.833713	-0.10603	-0.342267
CBV_PAM29672_c0_g1_i1	0.353085	0.53106	-0.732033	-0.152112
CBV_PAM66782_c0_g1_i1	-0.0726872	0.773987	-0.584366	-0.116934
CBV_PAM45525_c0_g1_i1	0.328465	0.596095	-0.277663	-0.646897
CBV_PAM55001_c0_g1_i1	0.123415	0.46734	-0.819978	0.229222
CBV_PAM25019_c0_g1_i1	0.373719	0.435994	-0.791457	-0.0182557
CBV_PAM5715_c0_g1_i1	0.178371	0.683297	-0.225448	-0.636219
CBV_PAM6616_c0_g1_i1	0.229933	0.53196	-0.785801	0.0239085
CBV_PAM53393_c0_g1_i1	0.345081	0.608982	-0.432427	-0.521636
CBV_PAM56529_c0_g1_i1	-0.203026	0.711704	0.113655	-0.622333
CBV_PAM45832_c0_g1_i1	-0.0717729	0.722271	-0.0021455	-0.648352
CBV_PAM52509_c0_g1_i1	0.289224	0.649184	-0.448545	-0.489864
CBV_PAM44803_c0_g1_i1	0.145921	0.664784	-0.682805	-0.1279
CBV_PAM23918_c1_g1_i1	0.476994	0.459137	-0.648248	-0.287883
CBV_PAM23672_c2_g1_i1	0.0420105	0.775675	-0.419	-0.398686
CBV_PAM40898_c0_g1_i1	0.31232	0.592919	-0.260735	-0.644504
CBV_PAM42571_c0_g1_i1	0.083728	0.686447	-0.106549	-0.663625
CBV_PAM19535_c0_g1_i1	-0.192549	0.83022	-0.3301	-0.307571
CBV_PAM12033_c0_g1_i1	0.263389	0.63861	-0.301568	-0.600431
CBV_PAM2716_c0_g1_i1	-0.302332	0.796769	-0.0530797	-0.441357
CBV_PAM42962_c0_g1_i1	0.0840768	0.715542	-0.194916	-0.604703
CBV_PAM64203_c0_g1_i1	0.504721	0.431421	-0.604129	-0.332013
CBV_PAM40712_c0_g1_i1	-0.118068	0.799294	-0.223548	-0.457678
CBV_PAM66035_c0_g1_i1	0.403493	0.486714	-0.20768	-0.682527
CBV_PAM44323_c0_g1_i1	0.199775	0.666254	-0.287829	-0.5782
CBV_PAM50819_c0_g1_i1	0.444386	0.385445	-0.734658	-0.0951728
CBV_PAM24271_c0_g1_i1	-0.172785	0.658595	0.14879	-0.6346
CBV_PAM52557_c0_g1_i1	0.128379	0.630087	-0.0751004	-0.683366
CBV_PAM604_c0_g1_i1	0.200104	0.58911	-0.70019	-0.0890243
CBV_PAM53200_c0_g1_i1	0.383533	0.542004	-0.375464	-0.550073
CBV_PAM29298_c0_g1_i1	0.353298	0.51268	-0.186552	-0.679426
CBV_PAM44638_c0_g1_i1	0.197938	0.624807	-0.172821	-0.649924
CBV_PAM1032_c0_g1_i1	0.303551	0.399832	-0.788798	0.0854161
CBV_PAM26165_c1_g8_i1	0.537672	0.395533	-0.466602	-0.466602
CBV_PAM12686_c0_g1_i1	0.0174155	0.590166	0.113001	-0.720582
CBV_PAM6983_c0_g1_i1	-0.266394	0.79658	-0.381316	-0.148869
CBV_PAM64719_c2_g1_i1	-0.541969	0.698389	0.113228	-0.269647
CBV_PAM57411_c0_g1_i1	-0.173248	0.733336	-0.0149016	-0.545186
CBV_PAM41942_c0_g1_i1	0.267319	0.624916	-0.465889	-0.426346
CBV_PAM10440_c0_g2_i1	-0.399754	0.73078	0.0687285	-0.399754
CBV_PAM51046_c0_g6_i1	-0.150559	0.589613	-0.660186	0.221132
CBV_PAM5954_c0_g1_i1	-0.00826619	0.752859	-0.326455	-0.418138
CBV_PAM1349_c1_g1_i1	-0.252948	0.726184	0.0319141	-0.50515
CBV_PAM53165_c0_g1_i1	-0.0965419	0.726441	-0.0784759	-0.551423
CBV_PAM12846_c0_g1_i1	0.0328892	0.608336	0.0460459	-0.687271
CBV_PAM54302_c0_g1_i1	0.390453	0.490048	-0.261449	-0.619053
CBV_PAM21465_c0_g1_i1	-0.249117	0.752515	-0.456987	-0.0464112
CBV_PAM915_c0_g1_i1	-0.014283	0.653011	-0.642091	0.00336364
CBV_PAM61413_c1_g1_i1	0.159033	0.617461	-0.132452	-0.644042
CBV_PAM3337_c0_g1_i1	0.213048	0.648644	-0.430846	-0.430846
CBV_PAM30215_c0_g1_i1	-0.185997	0.755217	-0.460058	-0.109162
CBV_PAM10188_c1_g1_i1	-0.26195	0.785851	-0.26195	-0.26195
CBV_PAM7248_c0_g1_i1	-0.0640026	0.728172	-0.147742	-0.516428
CBV_PAM16098_c0_g1_i1	0.278555	0.542122	-0.171637	-0.64904
CBV_PAM10415_c0_g1_i1	-0.227324	0.65102	0.145676	-0.569373
CBV_PAM13365_c0_g2_i1	-0.4896	0.741	-0.133033	-0.118367
CBV_PAM25676_c0_g1_i1	0.289637	0.57113	-0.566786	-0.293982
CBV_PAM67208_c0_g1_i1	0.210228	0.638193	-0.479914	-0.368507
CBV_PAM23790_c0_g1_i1	0.07688	0.654794	-0.132515	-0.599159
CBV_PAM48770_c0_g1_i1	0.379261	0.457674	-0.186701	-0.650234
CBV_PAM67855_c0_g1_i1	0.24739	0.591327	-0.263977	-0.574739
CBV_PAM53385_c0_g1_i1	0.265119	0.59603	-0.394363	-0.466786
CBV_PAM29655_c0_g1_i1	-0.456875	0.738846	-0.177789	-0.104182
CBV_PAM16656_c0_g1_i1	-0.396801	0.706513	0.0576727	-0.367385
CBV_PAM22057_c0_g1_i1	0.169001	0.562381	-0.0754319	-0.655949
CBV_PAM44465_c0_g1_i1	-0.202505	0.755395	-0.190426	-0.362464
CBV_PAM1179_c0_g1_i1	0.41173	0.45103	-0.561635	-0.301126
CBV_PAM27832_c1_g1_i1	0.247447	0.571809	-0.251228	-0.568028
CBV_PAM55994_c0_g1_i1	-0.228083	0.749144	-0.368556	-0.152506
CBV_PAM54011_c0_g1_i1	-0.358362	0.729945	-0.328818	-0.0427651
CBV_PAM5188_c0_g1_i1	0.232564	0.439449	0.0498246	-0.721838
CBV_PAM14745_c0_g1_i1	-0.167381	0.734031	-0.150884	-0.415767
CBV_PAM10562_c2_g1_i1	0.256119	0.432439	-0.712673	0.0241144
CBV_PAM67294_c0_g1_i1	0.313975	0.53526	-0.337179	-0.512057
CBV_PAM54378_c0_g1_i1	0.273058	0.563514	-0.51137	-0.325203
CBV_PAM15063_c0_g1_i1	-0.131085	0.705905	-0.481999	-0.092821
CBV_PAM25582_c0_g1_i1	0.355299	0.40333	-0.677882	-0.0807475
CBV_PAM59342_c0_g1_i1	0.3281	0.523731	-0.373463	-0.478367
CBV_PAM5435_c0_g1_i1	-0.145952	0.66305	0.0180341	-0.535132
CBV_PAM30521_c0_g1_i1	0.232249	0.48457	-0.0433844	-0.673435
CBV_PAM37193_c0_g1_i1	0.455257	0.403194	-0.465384	-0.393068
CBV_PAM68492_c0_g1_i1	0.131248	0.619736	-0.205917	-0.545067
CBV_PAM67690_c0_g1_i1	0.435751	0.416318	-0.476881	-0.375189
CBV_PAM39228_c0_g1_i1	0.386433	0.452985	-0.516969	-0.322449
CBV_PAM26169_c1_g1_i1	0.145207	0.510967	-0.664092	0.00791796
CBV_PAM65331_c1_g2_i1	-0.175421	0.703579	-0.427477	-0.10068
CBV_PAM48038_c0_g2_i1	-0.362882	0.671861	-0.362882	0.053903
CBV_PAM40737_c0_g1_i1	0.179497	0.462283	0.0413921	-0.683172
CBV_PAM25422_c0_g3_i1	-0.327183	0.703715	-0.0493501	-0.327183
CBV_PAM15901_c0_g1_i1	0.260009	0.54775	-0.311312	-0.496447
CBV_PAM805_c0_g4_i1	0.02242	0.611759	-0.0631627	-0.571017
CBV_PAM42983_c0_g1_i1	0.170839	0.441978	0.0753197	-0.688137
CBV_PAM3896_c0_g1_i1	0.287814	0.443652	-0.088661	-0.642805
CBV_PAM64270_c1_g1_i1	0.0869566	0.569508	-0.601152	-0.0553123
CBV_PAM28875_c0_g1_i1	0.154028	0.500109	-0.01082	-0.643317
CBV_PAM41136_c0_g1_i1	0.237794	0.556752	-0.346309	-0.448237
CBV_PAM10327_c2_g1_i1	0.225414	0.510032	-0.137612	-0.597833
CBV_PAM28201_c0_g1_i1	0.140534	0.612703	-0.422875	-0.330363
CBV_PAM54470_c0_g1_i1	0.0748163	0.636509	-0.269191	-0.442134
CBV_PAM64253_c0_g3_i1	-0.235542	0.706626	-0.235542	-0.235542
CBV_PAM4208_c0_g1_i1	0.0434221	0.592009	-0.083138	-0.552293
CBV_PAM25372_c0_g1_i1	0.0801347	0.518084	-0.619467	0.0212483
CBV_PAM75781_c0_g1_i1	-0.0709689	0.66396	-0.163933	-0.429058
CBV_PAM983_c0_g1_i1	0.25693	0.481018	-0.162434	-0.575514
CBV_PAM51693_c0_g1_i1	0.233366	0.526016	-0.247792	-0.51159
CBV_PAM10479_c0_g1_i1	0.372337	0.385648	-0.556643	-0.201341
CBV_PAM24908_c0_g1_i1	0.111675	0.453525	0.0493965	-0.614596
CBV_PAM50812_c0_g1_i1	-0.022732	0.580547	-0.062988	-0.494827
CBV_PAM45272_c0_g1_i1	0.126902	0.563037	-0.417073	-0.272866
CBV_PAM24215_c0_g1_i1	-0.439888	0.558585	0.0928229	-0.21152
CBV_PAM10976_c0_g1_i1	0.0676786	0.479546	0.0199574	-0.567182
CBV_PAM10227_c0_g5_i1	-0.293745	0.614044	-0.293745	-0.026554
CBV_PAM2522_c0_g1_i1	-0.213734	0.641201	-0.213734	-0.213734
CBV_PAM64270_c0_g1_i1	0.255389	0.382372	-0.576	-0.0617607
CBV_PAM65999_c0_g1_i1	0.20208	0.490379	-0.455196	-0.237263
CBV_PAM51200_c0_g1_i1	-0.0262776	0.560388	-0.0636699	-0.470441
CBV_PAM52040_c0_g1_i1	0.0795483	0.364447	-0.606234	0.162239
CBV_PAM37469_c0_g1_i1	-0.00643562	0.40984	0.173333	-0.576738
CBV_PAM25644_c0_g1_i1	-0.3752	0.534171	0.127275	-0.286246
CBV_PAM11422_c1_g1_i1	0.0557901	0.430506	0.0826442	-0.56894
CBV_PAM10434_c0_g1_i1	-0.0452712	0.599909	-0.314185	-0.240453
CBV_PAM10656_c0_g1_i1	0.188104	0.437829	-0.0956461	-0.530287
CBV_PAM51186_c0_g1_i1	0.30445	0.395457	-0.453696	-0.246211
CBV_PAM24263_c0_g1_i1	0.267942	0.370504	-0.533587	-0.104859
CBV_PAM12645_c0_g1_i1	0.0183487	0.537017	-0.102588	-0.452777
CBV_PAM24401_c0_g1_i1	0.00563572	0.556681	-0.165727	-0.396589
CBV_PAM1510_c1_g1_i1	0.0927711	0.535733	-0.299387	-0.329117
CBV_PAM4197_c0_g1_i1	-0.0666948	0.487356	0.0698407	-0.490502
CBV_PAM10313_c0_g1_i1	0.233217	0.374652	-0.528149	-0.0797203
CBV_PAM24434_c0_g1_i1	0.0517779	0.536588	-0.354737	-0.233628
CBV_PAM73454_c0_g1_i1	-0.185938	0.55656	-0.350802	-0.0198197
CBV_PAM37352_c0_g1_i1	0.0701618	0.379129	0.0961951	-0.545486
CBV_PAM1144_c1_g1_i1	0.0750023	0.459795	-0.0529351	-0.481862
CBV_PAM23760_c3_g1_i1	0.0828471	0.506466	-0.375496	-0.213817
CBV_PAM39888_c0_g1_i1	-0.132149	0.543647	-0.0465676	-0.36493
CBV_PAM17213_c0_g1_i1	0.0969978	0.503489	-0.312414	-0.288073
CBV_PAM2257_c0_g1_i1	-0.33255	0.551764	-0.099394	-0.119821
CBV_PAM1633_c0_g1_i1	0.117753	0.483308	-0.226106	-0.374955
CBV_PAM37657_c0_g1_i1	-0.19508	0.565689	-0.136737	-0.233872
CBV_PAM25852_c0_g1_i1	0.127074	0.420654	-0.0741391	-0.473589
CBV_PAM1469_c0_g1_i1	-0.104414	0.472501	0.0483714	-0.416459
CBV_PAM1604_c0_g1_i1	0.12095	0.347149	0.0448153	-0.512914
CBV_PAM24563_c0_g1_i1	-0.30011	0.468589	0.104844	-0.273322
CBV_PAM64724_c0_g1_i1	0.120453	0.404922	-0.0765069	-0.448868
CBV_PAM11873_c0_g1_i1	0.196536	0.394985	-0.368098	-0.223423
CBV_PAM52014_c0_g1_i1	-0.252641	0.523427	-0.175139	-0.0956462
CBV_PAM66946_c0_g1_i1	0.163203	0.306722	-0.500413	0.0304887
CBV_PAM51214_c0_g1_i1	0.0543924	0.432612	-0.402755	-0.0842494
CBV_PAM50979_c1_g1_i1	-0.0147345	0.389196	0.0667581	-0.44122
CBV_PAM64149_c0_g1_i1	0.203608	0.325284	-0.423742	-0.10515
CBV_PAM50912_c0_g1_i1	0.0568149	0.374593	-0.0120875	-0.41932

## Sheet: Subcluster9
Additional file 6. Expression subcluster matrix. Values of Trinity gene expression (TPM-TMM) for 15 subclusters identified by gene expression cluster analysis during fruit developmental stages (150, 240, 300 and 390 days after fruit set; DAFS) in Persea americana cv. Hass.
Trinity genes	150-DAFS	240-DAFS	300-DAFS	390-DAFS
CBV_PAM37570_c0_g5_i1	-1.10507	-1.81566	-0.993908	3.91465
CBV_PAM895_c0_g4_i1	-2.03402	1.02919	-1.7996	2.80443
CBV_PAM67016_c0_g1_i1	-1.60884	-0.73554	-1.05472	3.3991
CBV_PAM66953_c0_g1_i1	-1.1515	-1.34066	-0.759993	3.25215
CBV_PAM46375_c0_g1_i1	-1.85956	-0.805188	-0.479109	3.14386
CBV_PAM71190_c0_g1_i1	-2.3599	-0.2728	-0.269576	2.90228
CBV_PAM25904_c0_g1_i1	-2.04536	-1.23454	0.436214	2.84368
CBV_PAM23976_c0_g1_i1	-0.729108	-1.60789	-0.842079	3.17908
CBV_PAM56240_c0_g1_i1	-1.88237	-0.846788	-0.352081	3.08124
CBV_PAM30539_c0_g1_i1	-1.56244	-1.11826	-0.462956	3.14365
CBV_PAM42603_c0_g1_i1	-1.76424	-1.23452	0.0096631	2.9891
CBV_PAM25366_c0_g1_i1	-1.78233	-0.912162	-0.348778	3.04327
CBV_PAM72543_c0_g1_i1	-1.58207	-1.29883	0.0376773	2.84322
CBV_PAM64892_c1_g1_i1	-0.562546	-1.59247	-0.780496	2.93552
CBV_PAM1074_c2_g1_i1	-0.245386	-1.70082	-0.899525	2.84573
CBV_PAM28604_c0_g1_i1	-1.59509	-0.95197	-0.303274	2.85033
CBV_PAM11202_c1_g2_i1	-0.0780566	-2.35461	-0.0385619	2.47123
CBV_PAM37655_c1_g1_i1	-1.82654	-0.950353	0.0810944	2.6958
CBV_PAM10883_c1_g1_i1	-1.03543	-1.33151	-0.520647	2.8876
CBV_PAM65674_c0_g1_i1	-1.3482	-0.590057	-0.906427	2.84469
CBV_PAM51681_c1_g1_i1	-1.32621	-0.787335	-0.723548	2.83709
CBV_PAM51728_c0_g3_i1	-1.46303	-0.874092	-0.404359	2.74148
CBV_PAM1196_c1_g1_i1	-1.43052	-0.643246	-0.686697	2.76047
CBV_PAM50738_c1_g1_i1	-1.08099	-0.955156	-0.749708	2.78585
CBV_PAM13883_c0_g1_i1	-1.25274	-1.36505	-0.0158915	2.63368
CBV_PAM65109_c0_g1_i1	-1.69054	-1.19949	0.547549	2.34249
CBV_PAM59031_c1_g1_i1	-1.1515	-0.815104	-0.748161	2.71476
CBV_PAM4557_c0_g2_i1	-1.01015	-0.444447	-1.22153	2.67613
CBV_PAM66327_c0_g1_i1	-1.15018	-0.907659	-0.643857	2.7017
CBV_PAM12302_c0_g2_i1	-0.403809	-0.830578	-1.40946	2.64384
CBV_PAM38818_c0_g3_i1	-1.64142	-0.679108	-0.249659	2.57019
CBV_PAM32809_c0_g1_i1	0.46269	-1.19822	-1.60967	2.3452
CBV_PAM68072_c0_g1_i1	-1.17984	-0.856078	-0.630326	2.66625
CBV_PAM44183_c0_g1_i1	-1.05782	-0.825699	-0.797861	2.68138
CBV_PAM39515_c0_g1_i1	-1.33855	-1.01483	-0.234794	2.58818
CBV_PAM17159_c0_g1_i1	-1.28144	-0.742734	-0.618441	2.64261
CBV_PAM52271_c0_g1_i1	-0.929846	-1.10249	-0.609896	2.64223
CBV_PAM64364_c0_g1_i1	-1.26307	-1.20134	-0.0515656	2.51597
CBV_PAM44416_c0_g1_i1	-1.03571	-0.988988	-0.583729	2.60843
CBV_PAM37286_c1_g1_i1	-1.46919	-1.24646	0.418607	2.29704
CBV_PAM66349_c0_g1_i1	-0.743622	-1.11024	-0.750169	2.60403
CBV_PAM40444_c0_g1_i1	-1.16351	-0.673073	-0.752789	2.58937
CBV_PAM17079_c0_g1_i1	-1.3799	-0.429197	-0.727335	2.53643
CBV_PAM76009_c0_g2_i1	0.207148	-1.63948	-0.900994	2.33332
CBV_PAM25915_c1_g1_i1	-1.61396	-0.957493	0.307596	2.26386
CBV_PAM64243_c1_g1_i1	-1.75686	-0.336569	-0.229954	2.32338
CBV_PAM65781_c0_g1_i1	-1.43846	-1.25476	0.516336	2.17689
CBV_PAM26284_c0_g1_i1	-1.61758	-0.974893	0.388448	2.20403
CBV_PAM40796_c0_g1_i1	-0.837558	-0.935747	-0.752287	2.52559
CBV_PAM32440_c0_g1_i1	-0.965606	-1.20899	-0.221652	2.39625
CBV_PAM15613_c0_g1_i1	-1.42475	-0.339894	-0.609356	2.374
CBV_PAM38714_c0_g1_i1	-0.517111	-0.643398	-1.24868	2.40919
CBV_PAM40769_c1_g1_i1	-0.621726	-1.31142	-0.454073	2.38722
CBV_PAM29437_c0_g1_i1	-0.565371	-0.997328	-0.870742	2.43344
CBV_PAM2671_c0_g1_i1	-0.867711	-0.979339	-0.58807	2.43512
CBV_PAM25862_c0_g1_i1	-1.39638	-0.56939	-0.306704	2.27247
CBV_PAM53633_c0_g1_i1	-1.35477	-0.809792	-0.0379707	2.20253
CBV_PAM26467_c0_g1_i1	-0.507149	-1.19455	-0.576966	2.27866
CBV_PAM1470_c0_g1_i1	0.0758251	-1.33846	-0.884941	2.14757
CBV_PAM3050_c0_g1_i1	-1.13493	-1.27781	0.381524	2.03122
CBV_PAM40538_c0_g1_i1	-0.487951	-1.03302	-0.777095	2.29807
CBV_PAM39168_c1_g1_i1	-0.947918	-0.729802	-0.635633	2.31335
CBV_PAM51092_c0_g1_i1	-0.676966	-0.883254	-0.753355	2.31358
CBV_PAM17065_c0_g1_i1	-0.855244	-0.590353	-0.854559	2.30016
CBV_PAM851_c0_g1_i1	-1.59659	-0.555409	0.0969893	2.05501
CBV_PAM70861_c0_g1_i1	-1.6716	-0.630381	0.361261	1.94072
CBV_PAM37501_c0_g1_i1	-1.57139	-0.339266	-0.168861	2.07952
CBV_PAM64300_c2_g1_i1	-0.971939	-1.17155	0.0183779	2.12511
CBV_PAM14692_c0_g1_i1	-0.592043	-0.367386	-1.23603	2.19546
CBV_PAM763_c0_g1_i1	-0.883512	-1.12492	-0.169074	2.1775
CBV_PAM55419_c0_g1_i1	-1.17273	-0.52184	-0.517088	2.21165
CBV_PAM39764_c0_g1_i1	-1.12842	-1.16303	0.26809	2.02337
CBV_PAM47414_c0_g1_i1	-1.02665	-0.864576	-0.314775	2.206
CBV_PAM10693_c0_g1_i1	-0.836647	-1.19051	-0.12137	2.14853
CBV_PAM4581_c0_g1_i1	-0.678844	-0.879532	-0.684865	2.24324
CBV_PAM41648_c2_g1_i1	0.11518	-1.19844	-0.982611	2.06587
CBV_PAM1375_c0_g1_i1	-0.953673	-0.0369437	-1.11619	2.1068
CBV_PAM23892_c0_g1_i1	-0.549633	-0.951399	-0.708348	2.20938
CBV_PAM37614_c0_g1_i1	-0.910443	-0.753786	-0.54435	2.20858
CBV_PAM67460_c0_g1_i1	-0.64204	-0.705877	-0.865767	2.21368
CBV_PAM12437_c0_g1_i1	-1.28598	-0.879834	0.147035	2.01878
CBV_PAM24484_c2_g1_i1	-0.842319	-1.1921	-0.0550944	2.08951
CBV_PAM71045_c0_g1_i1	-1.16182	-0.807929	-0.145723	2.11547
CBV_PAM54170_c0_g1_i1	-0.92987	-0.431709	-0.808441	2.17002
CBV_PAM44333_c0_g1_i1	-1.11779	-0.903881	-0.0623469	2.08401
CBV_PAM39458_c0_g1_i1	-0.27107	-1.34783	-0.432966	2.05187
CBV_PAM770_c0_g1_i1	-0.994895	-0.498936	-0.639119	2.13295
CBV_PAM51732_c1_g1_i1	-1.03738	-1.19643	0.351925	1.88189
CBV_PAM10971_c0_g1_i1	-1.23667	-0.835722	0.0916299	1.98076
CBV_PAM23919_c1_g1_i1	-0.964432	-0.724332	-0.429888	2.11865
CBV_PAM65261_c0_g1_i1	-1.29475	-0.434743	-0.31075	2.04025
CBV_PAM50922_c0_g1_i1	-0.92305	-0.811216	-0.350078	2.08434
CBV_PAM11956_c0_g2_i1	-1.53464	-0.340694	0.0056724	1.86966
CBV_PAM10911_c0_g1_i1	-0.835586	-0.459596	-0.799825	2.09501
CBV_PAM67212_c1_g1_i1	-0.949967	-0.620298	-0.520574	2.09084
CBV_PAM76009_c0_g1_i1	-0.537834	-0.559427	-0.980834	2.07809
CBV_PAM11503_c0_g1_i1	-1.10068	-0.714835	-0.212511	2.02802
CBV_PAM40421_c0_g1_i1	-0.533587	-0.607574	-0.925049	2.06621
CBV_PAM28768_c0_g1_i1	-1.15378	-0.664656	-0.175269	1.9937
CBV_PAM10750_c0_g1_i1	-0.806829	-0.433653	-0.821319	2.0618
CBV_PAM55197_c0_g2_i1	-0.672337	-0.740384	-0.659568	2.07229
CBV_PAM73494_c0_g1_i1	-0.721453	-0.626615	-0.721453	2.06952
CBV_PAM27539_c0_g1_i1	-0.305753	-0.918635	-0.806759	2.03115
CBV_PAM24720_c0_g2_i1	-1.00173	-0.585369	-0.45229	2.03939
CBV_PAM73382_c0_g1_i1	-1.15489	-0.730019	-0.0698855	1.9548
CBV_PAM55390_c0_g1_i1	-1.19263	-0.430875	-0.361892	1.98539
CBV_PAM5231_c0_g1_i1	-1.06168	-0.473893	-0.48582	2.02139
CBV_PAM38956_c0_g1_i1	-1.14006	0.0295053	-0.810742	1.92129
CBV_PAM39698_c0_g1_i1	-0.60024	-0.593674	-0.840495	2.03441
CBV_PAM21965_c0_g1_i1	-0.765084	-0.253886	-0.969258	1.98823
CBV_PAM39543_c1_g1_i1	0.00441906	-1.02733	-0.888925	1.91183
CBV_PAM12887_c0_g2_i1	-1.23087	-0.722559	0.107257	1.84617
CBV_PAM5366_c0_g1_i1	-1.04269	-0.726119	-0.182399	1.95121
CBV_PAM39695_c0_g1_i1	-0.214106	-0.519337	-1.18914	1.92258
CBV_PAM5359_c0_g1_i1	-0.562905	-0.668942	-0.774787	2.00663
CBV_PAM12887_c0_g1_i1	-0.785122	-0.785122	-0.423994	1.99424
CBV_PAM30841_c0_g1_i1	-0.775242	-0.561993	-0.665873	2.00311
CBV_PAM41910_c0_g1_i1	-0.290552	-0.655611	-1.002	1.94816
CBV_PAM24468_c1_g1_i1	-1.28113	-0.550998	-0.00270501	1.83483
CBV_PAM65434_c0_g2_i1	-0.62198	0.0603721	-1.25953	1.82114
CBV_PAM51164_c1_g1_i1	-1.00856	-0.497182	-0.437377	1.94312
CBV_PAM20410_c0_g1_i1	-0.738614	-0.824742	-0.395315	1.95867
CBV_PAM25296_c0_g1_i1	-0.914979	-0.668508	-0.353957	1.93744
CBV_PAM39859_c1_g2_i1	-0.474985	-0.740241	-0.740241	1.95547
CBV_PAM24611_c0_g1_i1	-0.710975	-0.911855	-0.303057	1.92589
CBV_PAM7956_c0_g1_i1	-1.10356	-0.562546	-0.216285	1.88239
CBV_PAM1487_c0_g1_i1	-1.08622	-0.431913	-0.380044	1.89818
CBV_PAM67643_c1_g1_i1	-1.25922	-0.50413	-0.0337922	1.79714
CBV_PAM12032_c0_g1_i1	-0.350162	-0.0699162	-1.34219	1.76226
CBV_PAM69610_c0_g1_i1	-1.01894	-0.502955	-0.367263	1.88916
CBV_PAM26958_c0_g1_i1	-0.788004	-0.667262	-0.467373	1.92264
CBV_PAM10879_c0_g1_i1	-0.247994	-0.312408	-1.23591	1.79631
CBV_PAM41071_c0_g4_i1	-0.0946384	-0.803899	-0.937412	1.83595
CBV_PAM53885_c0_g1_i1	-0.114919	-0.766187	-0.945947	1.82705
CBV_PAM14189_c0_g1_i1	-0.883462	-1.0065	0.172763	1.7172
CBV_PAM36295_c0_g1_i1	-0.800278	-0.60401	-0.468843	1.87313
CBV_PAM51568_c0_g1_i1	-0.61205	-0.579171	-0.690614	1.88184
CBV_PAM53174_c0_g1_i1	-0.356036	-0.641048	-0.857202	1.85429
CBV_PAM24634_c0_g1_i1	-0.713757	-1.0558	0.0173912	1.75216
CBV_PAM27091_c0_g1_i1	-0.696586	-0.684879	-0.487493	1.86896
CBV_PAM27717_c0_g1_i1	-1.04367	-0.496028	-0.264328	1.80403
CBV_PAM64830_c0_g1_i1	-0.206862	-0.597631	-0.996069	1.80056
CBV_PAM23595_c2_g1_i1	-1.08707	-0.183946	-0.501302	1.77232
CBV_PAM41096_c2_g1_i1	-1.0308	-0.779725	0.0998218	1.71071
CBV_PAM55124_c0_g1_i1	-1.20306	-0.298441	-0.222474	1.72397
CBV_PAM70622_c0_g3_i1	0.0529536	-1.58989	0.120835	1.4161
CBV_PAM38729_c0_g1_i1	-0.119602	-0.340603	-1.22519	1.6854
CBV_PAM15451_c0_g1_i1	-0.669029	-0.690031	-0.464934	1.82399
CBV_PAM58381_c0_g1_i1	-0.607905	-0.271051	-0.908112	1.78707
CBV_PAM7261_c0_g1_i1	-0.991348	-0.96291	0.426382	1.52788
CBV_PAM60240_c0_g1_i1	-0.0543306	-0.498932	-1.1403	1.69356
CBV_PAM27088_c1_g1_i1	-0.455037	-0.641321	-0.710514	1.80687
CBV_PAM2504_c0_g1_i1	-0.451456	-0.258561	-1.03299	1.74301
CBV_PAM2501_c1_g1_i1	-0.599497	-0.599497	-0.599497	1.79849
CBV_PAM2443_c0_g1_i1	-0.283047	-0.927528	-0.542454	1.75303
CBV_PAM48471_c0_g2_i1	-0.907025	-0.623949	-0.210766	1.74174
CBV_PAM1009_c0_g3_i1	-0.164706	-1.0398	-0.503527	1.70803
CBV_PAM61018_c0_g1_i1	-0.750114	-0.259226	-0.738429	1.74777
CBV_PAM3969_c0_g1_i1	-0.841077	-0.736855	-0.138231	1.71616
CBV_PAM26898_c0_g1_i1	-0.599298	-0.756725	-0.408294	1.76432
CBV_PAM44738_c0_g1_i1	-0.2266	-0.811293	-0.697998	1.73589
CBV_PAM41154_c0_g1_i1	-1.19476	0.0665278	-0.468563	1.5968
CBV_PAM12614_c0_g1_i1	-1.14585	-0.0975158	-0.401786	1.64515
CBV_PAM54605_c0_g1_i1	-0.615652	-0.615652	-0.534835	1.76614
CBV_PAM7433_c0_g1_i1	-1.19153	0.0935402	-0.467884	1.56587
CBV_PAM70924_c0_g1_i1	-0.926742	-0.613789	-0.140503	1.68103
CBV_PAM25979_c1_g1_i1	-0.334898	-0.56398	-0.824422	1.7233
CBV_PAM51845_c0_g1_i1	0.059079	-1.43974	-0.0191312	1.39979
CBV_PAM27840_c0_g1_i1	-0.267933	-0.537073	-0.890281	1.69529
CBV_PAM13272_c0_g1_i1	-1.21552	-0.464191	0.162179	1.51753
CBV_PAM42411_c0_g1_i1	-0.689506	-0.380691	-0.653293	1.72349
CBV_PAM45414_c0_g1_i1	-0.655596	-0.655596	-0.414564	1.72576
CBV_PAM24228_c0_g2_i1	-1.19907	-0.338461	-0.0257389	1.56327
CBV_PAM48376_c0_g1_i1	-1.13757	-0.657333	0.324765	1.47014
CBV_PAM7310_c0_g1_i1	-1.11739	-0.382943	-0.100306	1.60063
CBV_PAM66424_c0_g1_i1	0.0393402	-0.992789	-0.641733	1.59518
CBV_PAM29380_c0_g1_i1	-1.02502	-0.415289	-0.192388	1.6327
CBV_PAM69214_c0_g1_i1	-0.172663	-0.626966	-0.860268	1.6599
CBV_PAM51455_c0_g1_i1	-0.639364	-1.11402	0.28358	1.4698
CBV_PAM12401_c0_g1_i1	-0.343737	-0.212199	-1.05705	1.61298
CBV_PAM48471_c0_g3_i1	-0.733995	-0.733995	-0.190682	1.65867
CBV_PAM14099_c0_g1_i1	-1.03224	-0.730044	0.294064	1.46822
CBV_PAM5735_c0_g1_i1	-1.1469	-0.0929555	-0.30962	1.54948
CBV_PAM39705_c0_g1_i1	-0.245195	-0.594107	-0.815466	1.65477
CBV_PAM5466_c0_g1_i1	-0.438791	-0.409767	-0.813284	1.66184
CBV_PAM53555_c0_g1_i1	-1.1661	-0.1366	-0.226333	1.52903
CBV_PAM28665_c0_g1_i1	-0.31535	-0.508309	-0.827066	1.65073
CBV_PAM39121_c0_g1_i1	-0.411129	-1.00474	-0.180672	1.59654
CBV_PAM10805_c0_g1_i1	-1.10252	-0.5399	0.150009	1.49242
CBV_PAM43574_c0_g1_i1	-0.371733	-0.458036	-0.822182	1.65195
CBV_PAM11974_c0_g1_i1	-1.14999	-0.0126961	-0.352759	1.51544
CBV_PAM57798_c0_g1_i1	-0.59162	-0.390501	-0.680024	1.66214
CBV_PAM57744_c0_g1_i1	-0.48668	-0.847942	-0.292272	1.62689
CBV_PAM76066_c0_g1_i1	-0.870569	-0.749031	0.0876389	1.53196
CBV_PAM50795_c0_g1_i1	-1.11464	-0.0891841	-0.318601	1.52243
CBV_PAM40313_c0_g1_i1	-0.352282	-0.98902	-0.236677	1.57798
CBV_PAM10308_c2_g1_i1	-0.822213	-0.543967	-0.244859	1.61104
CBV_PAM51285_c1_g1_i1	-0.742773	-0.992432	0.327873	1.40733
CBV_PAM74026_c0_g1_i1	-0.807776	-0.217554	-0.579289	1.60462
CBV_PAM69753_c0_g1_i1	-0.827277	-0.848199	0.204719	1.47076
CBV_PAM15831_c0_g1_i1	-0.806535	-0.301274	-0.500636	1.60845
CBV_PAM53564_c0_g1_i1	-0.53907	-0.547404	-0.551577	1.63805
CBV_PAM66183_c1_g1_i1	-0.137363	-0.703535	-0.742926	1.58382
CBV_PAM65332_c0_g1_i1	-0.104046	-0.751997	-0.71863	1.57467
CBV_PAM65210_c0_g1_i1	-1.12855	-0.330363	-0.0186877	1.4776
CBV_PAM40745_c0_g1_i1	-0.214535	-0.509142	-0.856287	1.57996
CBV_PAM24307_c1_g1_i1	-0.580006	-0.721815	-0.304911	1.60673
CBV_PAM19367_c0_g1_i1	-0.404044	-0.833764	-0.35718	1.59499
CBV_PAM37241_c1_g1_i1	-0.535238	-0.42268	-0.659835	1.61775
CBV_PAM23968_c0_g1_i1	-0.524491	-0.692352	-0.397253	1.6141
CBV_PAM3635_c0_g1_i1	-0.561452	-0.904156	-0.0700022	1.53561
CBV_PAM26897_c0_g1_i1	-1.05579	-0.332157	-0.108606	1.49656
CBV_PAM41101_c0_g1_i1	-0.527431	-0.233559	-0.809707	1.5707
CBV_PAM68341_c0_g1_i1	-0.550246	-0.802334	-0.214407	1.56699
CBV_PAM26921_c0_g1_i1	-0.535914	-0.535914	-0.535914	1.60774
CBV_PAM65557_c0_g1_i1	-0.338124	-0.62272	-0.632094	1.59294
CBV_PAM24904_c0_g1_i1	-0.696717	-0.348005	-0.536885	1.58161
CBV_PAM48580_c0_g1_i1	-0.673867	-0.729812	-0.139942	1.54362
CBV_PAM21885_c0_g1_i1	-0.143594	-0.764038	-0.63429	1.54192
CBV_PAM15339_c0_g1_i1	-0.215478	-0.946413	-0.353947	1.51584
CBV_PAM59984_c0_g1_i1	-0.653168	-0.623559	-0.290756	1.56748
CBV_PAM40105_c1_g1_i1	-0.524942	-0.579508	-0.479137	1.58359
CBV_PAM39672_c0_g1_i1	-0.192113	-0.180638	-1.07626	1.44901
CBV_PAM13772_c0_g1_i1	-0.944193	-0.60616	0.12353	1.42682
CBV_PAM70066_c0_g1_i1	-1.20473	0.000410255	-0.148597	1.35291
CBV_PAM41030_c0_g1_i1	-0.803183	-0.190693	-0.532742	1.52662
CBV_PAM10238_c0_g7_i1	-0.273365	-0.62031	-0.656462	1.55014
CBV_PAM51667_c0_g1_i1	-1.01643	-0.420794	0.000254394	1.43697
CBV_PAM39859_c1_g1_i1	-0.521991	-0.521991	-0.521991	1.56597
CBV_PAM18342_c0_g1_i1	-0.708858	-0.914811	0.265799	1.35787
CBV_PAM37938_c1_g1_i1	-0.21243	-0.58797	-0.725869	1.52627
CBV_PAM60897_c0_g1_i1	-1.06632	-0.42672	0.10955	1.38349
CBV_PAM56487_c1_g1_i1	-0.795724	-0.360719	-0.373455	1.5299
CBV_PAM54043_c0_g1_i1	-0.534235	-0.124044	-0.836923	1.4952
CBV_PAM68475_c0_g1_i1	-0.584408	-0.668678	-0.283034	1.53612
CBV_PAM25508_c0_g1_i1	-1.09971	0.27465	-0.479657	1.30472
CBV_PAM4293_c0_g1_i1	-0.478186	-0.510412	-0.561514	1.55011
CBV_PAM11056_c1_g1_i1	-0.764663	-0.887164	0.346406	1.30542
CBV_PAM27070_c0_g1_i1	-0.45748	-0.317022	-0.748419	1.52292
CBV_PAM60749_c0_g1_i1	-1.00405	-0.677912	0.452502	1.22946
CBV_PAM26780_c0_g1_i1	-0.551165	-0.369046	-0.616808	1.53702
CBV_PAM71811_c0_g1_i1	-0.811017	-0.20837	-0.480585	1.49997
CBV_PAM64220_c0_g7_i1	0.170642	-1.10989	-0.387543	1.32679
CBV_PAM15605_c0_g1_i1	-1.07993	-0.228139	-0.0859058	1.39398
CBV_PAM3268_c0_g2_i1	-0.175082	-1.09188	-0.12106	1.38802
CBV_PAM42989_c0_g1_i1	-0.370825	-0.445537	-0.707981	1.52434
CBV_PAM18837_c0_g1_i1	-0.406584	-0.498768	-0.627962	1.53331
CBV_PAM44423_c0_g1_i1	-0.495274	-0.611736	-0.42643	1.53344
CBV_PAM22531_c0_g1_i1	-0.948245	-0.653386	0.285416	1.31621
CBV_PAM58708_c0_g1_i1	-0.504113	-0.188039	-0.792735	1.48489
CBV_PAM71215_c0_g1_i1	-1.09086	-0.496316	0.332471	1.2547
CBV_PAM28935_c2_g1_i1	-0.757696	-0.0869879	-0.618007	1.46269
CBV_PAM27453_c0_g1_i1	-0.66372	-0.647301	-0.175182	1.4862
CBV_PAM65124_c0_g1_i1	-0.764315	-0.571307	-0.135819	1.47144
CBV_PAM63235_c0_g1_i1	-0.728173	-0.728173	0.0359878	1.42036
CBV_PAM733_c0_g1_i1	-0.885709	-0.507498	-0.0328801	1.42609
CBV_PAM69725_c0_g1_i1	-0.0613472	-0.515843	-0.859875	1.43706
CBV_PAM56109_c0_g1_i1	-0.992056	-0.514941	0.171098	1.3359
CBV_PAM18_c0_g1_i1	-0.740032	-0.705162	0.0295658	1.41563
CBV_PAM2561_c0_g1_i1	-0.475042	-0.361219	-0.662604	1.49886
CBV_PAM41668_c0_g1_i1	-0.409283	-0.579534	-0.515688	1.5045
CBV_PAM57110_c0_g1_i1	-0.275336	-0.507202	-0.694211	1.47675
CBV_PAM42111_c0_g1_i1	-0.995568	-0.549341	0.26869	1.27622
CBV_PAM16171_c0_g1_i1	-0.791634	-0.786381	0.288267	1.28975
CBV_PAM65948_c0_g1_i1	-0.611384	-0.498589	-0.377874	1.48785
CBV_PAM52874_c0_g1_i1	-0.723089	-0.845222	0.280032	1.28828
CBV_PAM34848_c0_g1_i1	-0.408226	-0.596513	-0.484114	1.48885
CBV_PAM19198_c0_g1_i1	-0.811709	-0.583185	-0.0047543	1.39965
CBV_PAM66627_c0_g1_i1	-0.931127	-0.402796	-0.0485391	1.38246
CBV_PAM29604_c0_g1_i1	-0.791933	-0.621548	0.0285831	1.3849
CBV_PAM52206_c2_g1_i1	-0.563481	-0.702763	-0.165641	1.43188
CBV_PAM51774_c2_g1_i1	-0.936927	-0.284735	-0.157944	1.37961
CBV_PAM64898_c0_g3_i1	-0.490133	-0.490133	-0.490133	1.4704
CBV_PAM72809_c0_g1_i1	-0.354042	-0.798303	-0.276884	1.42923
CBV_PAM27097_c1_g1_i1	-0.321088	-0.844298	-0.248345	1.41373
CBV_PAM5826_c0_g1_i1	-0.749313	-0.589314	-0.0606318	1.39926
CBV_PAM16836_c0_g1_i1	-0.992386	-0.145324	-0.206087	1.3438
CBV_PAM28701_c0_g1_i1	-0.233301	-0.452955	-0.736509	1.42276
CBV_PAM48808_c0_g1_i1	-0.916817	-0.584576	0.244165	1.25723
CBV_PAM15101_c0_g1_i1	-1.05631	0.0626314	-0.277832	1.27151
CBV_PAM58141_c0_g1_i1	-0.89503	-0.0784224	-0.382861	1.35631
CBV_PAM20753_c0_g1_i1	-0.999255	0.0914183	-0.371481	1.27932
CBV_PAM75683_c0_g1_i1	-0.738747	-0.822292	0.380276	1.18076
CBV_PAM56390_c0_g1_i1	-0.530586	-0.578826	-0.309992	1.4194
CBV_PAM179_c0_g1_i1	-0.739143	-0.108516	-0.524396	1.37205
CBV_PAM26025_c2_g1_i1	-0.964894	-0.0859358	-0.255969	1.3068
CBV_PAM6175_c0_g1_i1	-0.827816	-0.497636	-0.00571077	1.33116
CBV_PAM43136_c0_g1_i1	-0.828616	-0.558641	0.0903758	1.29688
CBV_PAM3924_c1_g1_i1	-0.995581	-0.279835	0.00316756	1.27225
CBV_PAM68801_c0_g1_i1	-1.08384	-0.115583	-0.0207571	1.22018
CBV_PAM38735_c0_g1_i1	-0.743428	0.261239	-0.743428	1.22562
CBV_PAM52004_c0_g1_i1	-0.454059	-0.204035	-0.720933	1.37903
CBV_PAM42588_c0_g1_i1	-0.334702	-0.411535	-0.652886	1.39912
CBV_PAM34754_c0_g1_i1	-0.726918	-0.261376	-0.39172	1.38001
CBV_PAM10597_c1_g1_i1	-0.910519	-0.583231	0.317839	1.17591
CBV_PAM4687_c0_g1_i1	-0.375133	-0.433711	-0.591165	1.40001
CBV_PAM6992_c0_g1_i1	-0.497038	-0.159508	-0.707188	1.36373
CBV_PAM38591_c2_g1_i1	-0.872336	-0.579653	0.249076	1.20291
CBV_PAM71179_c0_g1_i1	-0.486531	-0.540929	-0.366265	1.39373
CBV_PAM19936_c0_g1_i1	-0.95627	-0.366773	0.0794993	1.24354
CBV_PAM68214_c0_g1_i1	-0.705587	-0.486883	-0.162215	1.35468
CBV_PAM72416_c0_g1_i1	-0.762204	-0.520546	-0.035468	1.31822
CBV_PAM58375_c0_g1_i1	-0.891064	-0.180616	-0.23537	1.30705
CBV_PAM15710_c0_g1_i1	-0.681339	-0.036846	-0.6045	1.32268
CBV_PAM53633_c1_g1_i1	-0.676016	0.41115	-0.845631	1.1105
CBV_PAM66749_c0_g1_i1	-0.571311	-0.295315	-0.509748	1.37637
CBV_PAM2022_c3_g1_i1	-0.182246	-0.666976	-0.503026	1.35225
CBV_PAM33723_c0_g1_i1	-0.404566	-0.727305	-0.216973	1.34884
CBV_PAM69637_c0_g1_i1	-0.683138	0.128548	-0.696747	1.25134
CBV_PAM24626_c1_g1_i1	-0.862037	-0.130409	-0.30234	1.29479
CBV_PAM57282_c0_g1_i1	-0.498106	-0.457733	-0.419572	1.37541
CBV_PAM14302_c0_g1_i1	-0.50842	-0.52436	-0.337175	1.36995
CBV_PAM42802_c0_g1_i1	-0.507699	-0.485686	-0.379505	1.37289
CBV_PAM18054_c0_g1_i1	-0.794057	-0.136517	-0.379709	1.31028
CBV_PAM65793_c0_g2_i1	-0.456242	-0.456242	-0.456242	1.36873
CBV_PAM64800_c1_g1_i1	-0.865444	-0.394829	-0.00102891	1.2613
CBV_PAM1676_c0_g3_i1	-0.455322	-0.455322	-0.455322	1.36597
CBV_PAM3261_c0_g1_i1	-0.578466	-0.512533	-0.259236	1.35024
CBV_PAM39762_c1_g1_i1	-0.504689	-0.57736	-0.268443	1.35049
CBV_PAM42625_c0_g1_i1	-0.837868	-0.315224	-0.136699	1.28979
CBV_PAM10653_c0_g5_i1	-0.417781	-0.748307	-0.147552	1.31364
CBV_PAM37682_c2_g1_i1	-0.381348	-0.00241301	-0.870423	1.25418
CBV_PAM10867_c0_g1_i1	-0.292176	-0.922657	-0.0216698	1.2365
CBV_PAM56876_c1_g1_i1	-0.734281	-0.328852	-0.258969	1.3221
CBV_PAM7032_c2_g1_i1	-0.539445	-0.537558	-0.268068	1.34507
CBV_PAM4359_c0_g1_i1	-0.625445	-0.523083	-0.177089	1.32562
CBV_PAM5580_c0_g1_i1	-0.59909	-0.225466	-0.510515	1.33507
CBV_PAM67062_c0_g1_i1	-0.928033	-0.471382	0.268759	1.13066
CBV_PAM11139_c1_g1_i1	-0.840018	-0.234733	-0.199483	1.27424
CBV_PAM40527_c0_g4_i1	-0.102791	-1.12107	0.162226	1.06164
CBV_PAM3215_c0_g1_i1	-0.349648	-0.343967	-0.637693	1.33131
CBV_PAM45268_c0_g1_i1	-0.557464	-0.557464	-0.208647	1.32357
CBV_PAM6433_c1_g1_i1	-0.461875	-0.60077	-0.267414	1.33006
CBV_PAM53106_c1_g1_i1	-0.65196	-0.597491	-0.0246622	1.27411
CBV_PAM16050_c0_g1_i1	-0.555903	-0.0418997	-0.678595	1.2764
CBV_PAM69648_c0_g1_i1	-0.605977	-0.418485	-0.303371	1.32783
CBV_PAM68691_c0_g1_i1	-0.279785	-0.894693	-0.0530619	1.22754
CBV_PAM26588_c0_g1_i1	-0.440811	-0.751511	-0.080673	1.273
CBV_PAM29456_c0_g1_i1	-0.437934	-0.586539	-0.298194	1.32267
CBV_PAM23822_c4_g1_i1	-0.871909	-0.193276	-0.174112	1.2393
CBV_PAM56757_c0_g1_i1	-0.522696	-0.598035	-0.18202	1.30275
CBV_PAM53229_c0_g1_i1	-0.572605	-0.364851	-0.385753	1.32321
CBV_PAM52299_c0_g3_i1	-0.552304	-0.552304	-0.201962	1.30657
CBV_PAM29678_c0_g1_i1	-0.804113	-0.542266	0.168112	1.17827
CBV_PAM1048_c0_g1_i1	-0.284086	-0.265531	-0.736785	1.2864
CBV_PAM73640_c0_g1_i1	-0.782204	-0.219797	-0.269155	1.27116
CBV_PAM27255_c0_g1_i1	-0.504712	-0.321243	-0.494449	1.3204
CBV_PAM2727_c0_g3_i1	-0.705793	0.286389	-0.705793	1.1252
CBV_PAM48695_c0_g1_i1	-0.701586	-0.224024	-0.364399	1.29001
CBV_PAM27303_c1_g1_i1	-0.607892	0.0921236	-0.696684	1.21245
CBV_PAM1146_c0_g1_i1	-0.775243	-0.310621	-0.179103	1.26497
CBV_PAM41482_c1_g1_i1	-0.882354	0.0732037	-0.362636	1.17179
CBV_PAM66516_c0_g1_i1	-0.74249	-0.381948	-0.126861	1.2513
CBV_PAM10927_c0_g1_i1	-0.446584	-0.541859	-0.310404	1.29885
CBV_PAM12984_c1_g1_i1	-0.516438	-0.403564	-0.372381	1.29238
CBV_PAM60671_c0_g1_i1	-0.454855	-0.653925	-0.14286	1.25164
CBV_PAM37502_c0_g1_i1	-0.835165	-0.329116	-0.0249769	1.18926
CBV_PAM67972_c0_g1_i1	-0.537726	-0.470474	-0.268178	1.27638
CBV_PAM27360_c0_g1_i1	-0.512663	-0.386514	-0.384273	1.28345
CBV_PAM29393_c0_g1_i1	-0.46612	-0.17264	-0.616964	1.25572
CBV_PAM52523_c1_g2_i1	-0.428219	-0.428219	-0.428219	1.28466
CBV_PAM39059_c1_g1_i1	-0.772898	-0.455442	0.0639775	1.16436
CBV_PAM26748_c1_g1_i1	-0.952526	-0.0830158	-0.0693631	1.1049
CBV_PAM1284_c1_g1_i1	-0.238618	-0.57531	-0.431307	1.24523
CBV_PAM27046_c0_g1_i1	-0.535913	-0.478852	-0.231852	1.24662
CBV_PAM58555_c0_g1_i1	-0.451478	-0.355063	-0.451478	1.25802
CBV_PAM6738_c0_g1_i1	-0.533975	-0.460266	-0.250546	1.24479
CBV_PAM68462_c1_g1_i1	-0.665685	0.112831	-0.587534	1.14039
CBV_PAM52542_c0_g1_i1	-0.569016	-0.595658	-0.0232001	1.18787
CBV_PAM40557_c0_g1_i1	-0.811502	-0.350323	0.0213518	1.14047
CBV_PAM35182_c0_g1_i1	-0.611466	-0.423124	-0.174584	1.20917
CBV_PAM7196_c0_g1_i1	-0.600473	-0.538664	-0.0362643	1.1754
CBV_PAM6493_c0_g1_i1	-0.48356	-0.0974949	-0.604572	1.18563
CBV_PAM61938_c0_g1_i1	-0.4072	-0.4072	-0.4072	1.2216
CBV_PAM35989_c0_g1_i1	-0.699743	-0.395425	-0.0590346	1.1542
CBV_PAM50966_c1_g2_i1	-0.193625	-0.866147	-0.0322919	1.09206
CBV_PAM797_c0_g1_i1	-0.580736	-0.285625	-0.334712	1.20107
CBV_PAM59796_c0_g1_i1	-0.789991	-0.34797	0.0438006	1.09416
CBV_PAM51840_c3_g1_i1	-0.744183	-0.312401	-0.0692971	1.12588
CBV_PAM6178_c0_g1_i1	-0.490938	-0.670595	0.0842044	1.07733
CBV_PAM25735_c0_g1_i1	-0.687101	-0.3191	-0.109542	1.11574
CBV_PAM40070_c0_g1_i1	-0.546487	-0.393036	-0.211892	1.15142
CBV_PAM14725_c0_g1_i1	-0.444852	-0.523039	-0.177329	1.14522
CBV_PAM41390_c0_g1_i1	-0.44607	-0.630284	-0.0122726	1.08863
CBV_PAM59596_c0_g1_i1	-0.490895	-0.136819	-0.490895	1.11861
CBV_PAM68465_c0_g1_i1	-0.547287	-0.332812	-0.250305	1.1304
CBV_PAM40508_c0_g1_i1	-0.637714	-0.46021	0.0362023	1.06172
CBV_PAM1206_c1_g1_i1	-0.509424	-0.341109	-0.282035	1.13257
CBV_PAM1316_c0_g1_i1	-0.478016	-0.411086	-0.241735	1.13084
CBV_PAM2088_c0_g1_i1	-0.313362	-0.50103	-0.309254	1.12365
CBV_PAM65192_c0_g2_i1	-0.54637	0.043554	-0.54637	1.04919
CBV_PAM57884_c0_g1_i1	-0.366581	-0.448478	-0.295926	1.11099

## Sheet: Subcluster10
Additional file 6. Expression subcluster matrix. Values of Trinity gene expression (TPM-TMM) for 15 subclusters identified by gene expression cluster analysis during fruit developmental stages (150, 240, 300 and 390 days after fruit set; DAFS) in Persea americana cv. Hass.
Trinity genes	150-DAFS	240-DAFS	300-DAFS	390-DAFS
CBV_PAM64486_c0_g3_i1	-1.9283	1.99498	-1.93835	1.87168
CBV_PAM10782_c0_g4_i1	-1.95564	1.6782	0.186129	0.0913045
CBV_PAM66052_c0_g1_i1	-1.90412	1.41871	-0.361496	0.846902
CBV_PAM37271_c0_g6_i1	-1.90709	1.07363	-0.0533082	0.886771
CBV_PAM53213_c0_g1_i1	-1.92093	1.25597	0.235867	0.429096
CBV_PAM1080_c0_g2_i1	-1.78523	1.22902	0.754671	-0.198456
CBV_PAM37654_c0_g2_i1	-1.50327	1.4353	-0.383894	0.451859
CBV_PAM51154_c0_g1_i1	-1.41697	1.3212	-0.623654	0.71943
CBV_PAM65937_c0_g5_i1	-1.44321	1.58549	-0.12835	-0.0139283
CBV_PAM50841_c2_g2_i1	-1.81919	0.85476	0.631936	0.332493
CBV_PAM51649_c0_g1_i1	-1.62147	0.674973	0.065275	0.881226
CBV_PAM37879_c1_g1_i1	-1.5348	0.710197	-0.157908	0.982513
CBV_PAM50708_c1_g1_i1	-1.66057	0.597898	0.656536	0.406133
CBV_PAM66122_c0_g1_i1	-1.50601	0.484848	-0.0481408	1.06931
CBV_PAM51497_c0_g1_i1	-1.62084	0.558427	0.590968	0.471445
CBV_PAM70007_c0_g2_i1	-0.930902	0.97358	-0.930902	0.888224
CBV_PAM11419_c0_g4_i1	-0.925674	0.877125	-0.925674	0.974223
CBV_PAM42635_c0_g1_i1	-1.31091	1.1005	-0.350205	0.560622
CBV_PAM64183_c2_g1_i1	-1.25495	1.19238	0.404466	-0.341896
CBV_PAM66411_c0_g1_i1	-1.53722	0.681756	0.248512	0.606956
CBV_PAM11202_c1_g1_i1	-1.30359	1.17126	-0.133016	0.265346
CBV_PAM38468_c0_g1_i1	-1.18159	0.311978	-0.334986	1.2046
CBV_PAM37180_c0_g3_i1	-1.39414	1.01279	0.140691	0.240653
CBV_PAM13209_c1_g4_i1	-1.41616	0.870703	0.407812	0.137649
CBV_PAM1745_c0_g1_i1	-1.41189	0.902426	0.253204	0.256258
CBV_PAM25089_c1_g1_i1	-1.4507	0.334463	0.525463	0.590774
CBV_PAM47735_c0_g1_i1	-1.41469	0.724486	0.176225	0.513983
CBV_PAM19463_c0_g1_i1	-1.42553	0.354076	0.339654	0.731803
CBV_PAM64845_c0_g1_i1	-1.42246	0.254239	0.6666	0.501623
CBV_PAM12163_c0_g1_i1	-1.21964	1.06468	-0.152938	0.3079
CBV_PAM17219_c0_g1_i1	-1.41796	0.276634	0.587621	0.553703
CBV_PAM24780_c0_g1_i1	-1.42753	0.464028	0.378685	0.584815
CBV_PAM38477_c0_g1_i1	-1.36626	0.400112	0.170034	0.796111
CBV_PAM40174_c0_g1_i1	-1.12461	0.937411	-0.417046	0.604243
CBV_PAM24116_c1_g1_i1	-1.20798	0.501998	-0.240408	0.946392
CBV_PAM1314_c0_g1_i1	-1.20676	0.0422533	0.0716376	1.09286
CBV_PAM43877_c0_g1_i1	-1.39438	0.645677	0.28584	0.462865
CBV_PAM40959_c0_g1_i1	-1.37892	0.741241	0.330017	0.307661
CBV_PAM65134_c1_g1_i1	-1.31972	0.375165	0.0800096	0.864547
CBV_PAM39348_c0_g1_i1	-1.37549	0.553709	0.622574	0.199205
CBV_PAM39035_c0_g1_i1	-1.35203	0.494032	0.124443	0.733551
CBV_PAM64232_c1_g1_i1	-1.38239	0.281691	0.560647	0.540056
CBV_PAM52989_c0_g7_i1	-1.05374	1.20156	-0.196734	0.0489155
CBV_PAM62221_c0_g1_i1	-1.24662	0.909418	0.445418	-0.108211
CBV_PAM16522_c0_g1_i1	-1.00968	1.21046	-0.301826	0.101046
CBV_PAM10274_c0_g1_i1	-1.35193	0.171677	0.483217	0.697038
CBV_PAM33347_c0_g1_i1	-1.10917	-0.0856354	0.045136	1.14967
CBV_PAM51266_c0_g1_i1	-1.29602	0.342338	0.0840139	0.869667
CBV_PAM65992_c0_g1_i1	-1.32437	0.172986	0.361396	0.789985
CBV_PAM23624_c1_g1_i1	-0.973616	0.0535594	-0.290213	1.21027
CBV_PAM16201_c0_g1_i1	-1.13974	0.0416691	0.00382028	1.09425
CBV_PAM65790_c0_g2_i1	-1.22178	0.829891	-0.136433	0.528321
CBV_PAM3970_c0_g1_i1	-1.1091	0.0221176	0.00461882	1.08236
CBV_PAM69391_c0_g1_i1	-1.07406	0.159828	-0.175072	1.0893
CBV_PAM25340_c0_g1_i1	-1.32818	0.319286	0.402674	0.606218
CBV_PAM38444_c1_g1_i1	-0.947671	1.08382	-0.455717	0.319564
CBV_PAM11238_c2_g1_i1	-1.22593	0.239188	0.0849855	0.901758
CBV_PAM65060_c0_g1_i1	-1.05901	-0.0416201	-0.0103153	1.11095
CBV_PAM10238_c0_g2_i1	-1.31433	0.414913	0.297468	0.601947
CBV_PAM10563_c0_g1_i1	-1.11826	1.02819	0.124443	-0.0343824
CBV_PAM58633_c0_g1_i1	-1.29598	0.348479	0.298674	0.648822
CBV_PAM54038_c0_g1_i1	-1.29676	0.544164	0.225343	0.527255
CBV_PAM37328_c0_g1_i1	-1.02733	0.648663	-0.424463	0.803126
CBV_PAM12023_c0_g1_i1	-1.28522	0.237468	0.389432	0.658317
CBV_PAM52961_c0_g1_i1	-1.16897	-0.154077	0.639981	0.683066
CBV_PAM25777_c0_g1_i1	-1.29882	0.471311	0.417061	0.410445
CBV_PAM39624_c0_g1_i1	-1.23565	0.782538	0.160734	0.292382
CBV_PAM3291_c0_g1_i1	-1.15011	-0.183663	0.619473	0.714302
CBV_PAM4424_c0_g1_i1	-1.2138	-0.000924266	0.468681	0.746046
CBV_PAM15082_c1_g1_i1	-1.13223	0.0362037	0.125813	0.970214
CBV_PAM55860_c0_g1_i1	-1.03995	-0.166247	0.153903	1.05229
CBV_PAM52094_c0_g1_i1	-1.093	-0.117394	0.225394	0.985004
CBV_PAM12352_c0_g1_i1	-1.24285	0.0994464	0.493088	0.650312
CBV_PAM42938_c0_g1_i1	-1.02163	-0.13985	0.0940444	1.06744
CBV_PAM10314_c1_g1_i1	-0.763972	0.930521	-0.694271	0.527722
CBV_PAM50754_c0_g2_i1	-1.00881	0.252732	-0.270456	1.02653
CBV_PAM5692_c0_g1_i1	-0.988506	1.0851	0.100584	-0.197177
CBV_PAM31877_c0_g1_i1	-1.0974	-0.0959315	0.229746	0.963591
CBV_PAM23916_c0_g5_i1	-1.15704	0.627448	-0.132198	0.661791
CBV_PAM50031_c0_g1_i1	-1.06184	1.02197	0.104091	-0.0642211
CBV_PAM37558_c0_g1_i1	-1.23952	0.504862	0.158959	0.575702
CBV_PAM26514_c0_g1_i1	-1.08287	0.00907378	0.0933154	0.980484
CBV_PAM24497_c0_g1_i1	-1.26368	0.384697	0.36718	0.511805
CBV_PAM40235_c1_g1_i1	-1.20527	0.756124	0.313975	0.135173
CBV_PAM23726_c2_g1_i1	-1.26381	0.349231	0.460155	0.454429
CBV_PAM4317_c0_g1_i1	-1.26312	0.4232	0.391514	0.44841
CBV_PAM10930_c0_g8_i1	-1.12903	0.0844798	0.136544	0.908002
CBV_PAM3431_c0_g1_i1	-1.07278	0.107252	-0.0101538	0.975681
CBV_PAM1597_c2_g1_i1	-1.11974	-0.167979	0.61178	0.675939
CBV_PAM24492_c0_g1_i1	-0.804814	1.0498	-0.526676	0.28169
CBV_PAM1288_c1_g1_i1	-1.16199	0.163029	0.171187	0.827777
CBV_PAM24363_c0_g2_i1	-0.935094	-0.425737	0.465574	0.895256
CBV_PAM44056_c0_g1_i1	-1.12213	0.014707	0.238684	0.868736
CBV_PAM25490_c0_g1_i1	-1.11031	0.0665065	0.143359	0.900444
CBV_PAM51143_c0_g1_i1	-1.08298	0.208895	-0.0476597	0.921749
CBV_PAM50679_c0_g1_i1	-1.23682	0.375566	0.526662	0.334591
CBV_PAM10780_c0_g1_i1	-1.23639	0.306682	0.467268	0.462444
CBV_PAM37502_c1_g1_i1	-1.10768	0.00336442	0.221934	0.882376
CBV_PAM64648_c1_g1_i1	-1.15746	0.0982125	0.260977	0.798274
CBV_PAM14514_c0_g1_i1	-1.21588	0.53968	0.178234	0.497962
CBV_PAM67335_c0_g1_i1	-0.770877	0.973046	-0.594	0.391831
CBV_PAM7384_c0_g1_i1	-1.21171	0.480705	0.195981	0.535024
CBV_PAM3584_c0_g1_i1	-1.19411	0.182824	0.359294	0.651993
CBV_PAM11702_c0_g4_i1	-0.708898	0.695673	-0.708898	0.722122
CBV_PAM14357_c0_g1_i1	-1.22247	0.306767	0.47981	0.435893
CBV_PAM51504_c0_g1_i1	-1.22421	0.330924	0.453037	0.440253
CBV_PAM51827_c0_g1_i1	-1.01812	-0.166606	0.248404	0.936324
CBV_PAM56004_c0_g1_i1	-0.939801	0.0288413	-0.137018	1.04798
CBV_PAM38060_c0_g1_i1	-1.11694	0.227741	0.0553878	0.83381
CBV_PAM53313_c0_g1_i1	-0.876797	-0.462873	0.44405	0.895621
CBV_PAM29076_c0_g1_i1	-0.98695	0.142808	-0.138222	0.982364
CBV_PAM33330_c0_g1_i1	-1.00582	-0.0844271	0.118295	0.97195
CBV_PAM24938_c0_g1_i1	-1.11683	-0.0350414	0.39645	0.75542
CBV_PAM39453_c0_g1_i1	-1.08042	0.0633328	0.129929	0.887158
CBV_PAM44146_c0_g1_i1	-1.17729	0.31824	0.186702	0.672348
CBV_PAM18096_c0_g1_i1	-1.1896	0.300586	0.255167	0.633847
CBV_PAM1894_c1_g1_i1	-1.07169	-0.151852	0.458596	0.764948
CBV_PAM11318_c0_g1_i1	-1.14851	0.0288294	0.483672	0.636012
CBV_PAM31451_c0_g1_i1	-1.12621	-0.0322021	0.527497	0.630919
CBV_PAM25866_c0_g1_i1	-1.20142	0.339263	0.349526	0.51263
CBV_PAM26849_c0_g1_i1	-1.15266	0.247382	0.190692	0.714587
CBV_PAM24216_c2_g1_i1	-0.93548	-0.00118826	-0.0892625	1.02593
CBV_PAM3344_c0_g1_i1	-1.15641	0.150662	0.348719	0.657028
CBV_PAM1700_c0_g1_i1	-0.928584	-0.294501	0.28444	0.938645
CBV_PAM15408_c0_g1_i1	-1.14732	0.585076	0.495622	0.0666216
CBV_PAM53110_c0_g1_i1	-1.17824	0.283728	0.58717	0.307344
CBV_PAM562_c0_g1_i1	-1.15046	0.0827201	0.550934	0.516803
CBV_PAM56931_c0_g1_i1	-1.13891	0.183261	0.242522	0.713125
CBV_PAM11286_c1_g1_i1	-1.06694	-0.144679	0.582001	0.629619
CBV_PAM47461_c0_g1_i1	-1.10049	-0.0370933	0.446743	0.690845
CBV_PAM10910_c0_g4_i1	-1.14715	0.219873	0.258752	0.668523
CBV_PAM50673_c0_g1_i1	-1.07033	0.223204	0.0230007	0.824129
CBV_PAM13441_c1_g1_i1	-1.00879	-0.199864	0.398235	0.81042
CBV_PAM7323_c0_g1_i1	-1.18268	0.434757	0.339709	0.408211
CBV_PAM68880_c0_g1_i1	-1.17471	0.390583	0.276934	0.507196
CBV_PAM4570_c0_g1_i1	-0.988836	-0.130775	0.21221	0.907401
CBV_PAM12968_c1_g1_i1	-1.09198	-0.059419	0.573048	0.578347
CBV_PAM23870_c1_g1_i1	-0.99881	-0.0543212	0.141814	0.911317
CBV_PAM64450_c0_g1_i1	-0.872149	0.269459	-0.345115	0.947805
CBV_PAM64485_c0_g1_i1	-1.0256	0.67126	-0.19702	0.55136
CBV_PAM1666_c0_g1_i1	-1.00712	-0.203483	0.452995	0.75761
CBV_PAM27057_c0_g1_i1	-1.06592	0.18375	0.0701551	0.812014
CBV_PAM75218_c0_g1_i1	-0.946633	-0.330303	0.58309	0.693846
CBV_PAM13496_c0_g1_i1	-1.1059	0.0372541	0.422337	0.646306
CBV_PAM7043_c0_g1_i1	-0.921017	-0.314682	0.389842	0.845858
CBV_PAM65444_c1_g1_i1	-1.12771	0.0954882	0.51189	0.520335
CBV_PAM10713_c1_g1_i1	-0.977283	0.161505	-0.0919269	0.907705
CBV_PAM15539_c0_g1_i1	-1.01879	0.835727	-0.0669565	0.250016
CBV_PAM52550_c0_g8_i1	-1.11471	0.0632081	0.521234	0.53027
CBV_PAM65646_c0_g1_i1	-1.08369	0.46176	-0.0117344	0.633669
CBV_PAM57053_c0_g1_i1	-0.983834	-0.246498	0.597079	0.633254
CBV_PAM4716_c0_g1_i1	-1.15505	0.331138	0.378928	0.444983
CBV_PAM23622_c1_g1_i1	-1.079	-0.0296142	0.605993	0.502622
CBV_PAM37586_c0_g1_i1	-1.0839	-0.0125029	0.524417	0.571985
CBV_PAM38754_c0_g1_i1	-1.13977	0.545909	0.309157	0.284701
CBV_PAM617_c0_g1_i1	-0.9114	0.950906	0.110987	-0.150493
CBV_PAM1353_c0_g1_i1	-1.13091	0.17684	0.519648	0.434423
CBV_PAM3181_c0_g1_i1	-1.13889	0.324597	0.28837	0.525921
CBV_PAM10238_c0_g3_i1	-1.10782	0.173331	0.294839	0.639653
CBV_PAM64183_c1_g8_i1	-1.09769	0.583936	0.0625774	0.451181
CBV_PAM1670_c1_g1_i1	-1.03711	0.172589	0.0632245	0.801294
CBV_PAM13679_c0_g1_i1	-0.886263	-0.202925	0.139218	0.949971
CBV_PAM43692_c0_g1_i1	-1.13727	0.339149	0.308051	0.490073
CBV_PAM10238_c0_g6_i1	-1.12397	0.202242	0.539089	0.382641
CBV_PAM52242_c0_g1_i1	-1.04976	-0.0674747	0.500086	0.617148
CBV_PAM70223_c0_g1_i1	-0.82192	0.26573	-0.368006	0.924196
CBV_PAM26899_c0_g1_i1	-0.523563	0.79573	-0.76452	0.492353
CBV_PAM53886_c0_g1_i1	-1.11191	0.132838	0.479065	0.500004
CBV_PAM2005_c0_g1_i1	-1.00258	-0.112648	0.344599	0.770626
CBV_PAM52677_c0_g1_i1	-1.03277	0.189073	0.0533215	0.790374
CBV_PAM11611_c0_g1_i1	-1.03677	0.207552	0.0552817	0.773939
CBV_PAM50781_c0_g1_i1	-1.08271	0.0952955	0.341509	0.645902
CBV_PAM27533_c0_g1_i1	-1.0219	-0.110491	0.481578	0.650816
CBV_PAM64300_c0_g1_i1	-1.08878	0.105858	0.367496	0.615427
CBV_PAM64753_c0_g1_i1	-1.09468	0.0932573	0.498134	0.503287
CBV_PAM32676_c0_g1_i1	-0.974085	0.0238775	0.0846919	0.865516
CBV_PAM24641_c1_g1_i1	-1.069	0.0197899	0.469044	0.580167
CBV_PAM56812_c0_g1_i1	-1.08827	0.0907898	0.431687	0.565797
CBV_PAM1230_c0_g1_i1	-1.07136	0.215072	0.179749	0.676541
CBV_PAM43821_c0_g1_i1	-0.938225	0.228626	-0.144014	0.853613
CBV_PAM24788_c0_g1_i1	-0.890269	-0.0799119	0.0333561	0.936825
CBV_PAM69948_c0_g1_i1	-1.10092	0.438885	0.487945	0.174093
CBV_PAM23718_c0_g1_i1	-0.938426	0.835192	0.26189	-0.158657
CBV_PAM51672_c1_g1_i1	-0.899712	0.890004	0.191511	-0.181803
CBV_PAM58447_c0_g1_i1	-0.965897	-0.0899858	0.243746	0.812137
CBV_PAM38553_c0_g1_i1	-1.1109	0.309242	0.342099	0.459557
CBV_PAM41037_c0_g1_i1	-0.926196	0.851066	-0.153385	0.228515
CBV_PAM2683_c1_g1_i1	-1.08023	0.52785	0.104963	0.447421
CBV_PAM898_c0_g1_i1	-0.988851	-0.0251443	0.220685	0.79331
CBV_PAM24674_c0_g1_i1	-0.680614	0.285191	-0.521151	0.916575
CBV_PAM42474_c0_g1_i1	-1.08923	0.183086	0.344665	0.561475
CBV_PAM16359_c0_g1_i1	-0.825651	-0.407405	0.464811	0.768245
CBV_PAM1162_c2_g4_i1	-1.07436	0.0914569	0.541421	0.441487
CBV_PAM1369_c0_g1_i1	-1.08815	0.237467	0.271096	0.579591
CBV_PAM25401_c0_g1_i1	-1.05624	0.254179	0.132752	0.669309
CBV_PAM51549_c0_g1_i1	-0.945231	0.0291531	0.0506611	0.865417
CBV_PAM38648_c0_g1_i1	-0.822356	-0.196472	0.0557079	0.96312
CBV_PAM39097_c0_g1_i1	-0.972129	-0.0148684	0.169875	0.817122
CBV_PAM16806_c0_g1_i1	-0.918472	-0.148479	0.21424	0.852711
CBV_PAM11347_c1_g1_i1	-1.01347	0.123424	0.134924	0.755122
CBV_PAM25969_c2_g1_i1	-0.804555	-0.0389749	-0.136914	0.980444
CBV_PAM10599_c1_g1_i1	-0.995435	0.58051	-0.116665	0.53159
CBV_PAM12633_c0_g1_i1	-0.922164	-0.254414	0.511749	0.664829
CBV_PAM40197_c1_g1_i1	-0.885876	-0.130048	0.120266	0.895658
CBV_PAM51349_c0_g1_i1	-1.05758	0.160154	0.265428	0.632
CBV_PAM2610_c0_g1_i1	-1.04655	0.617896	0.363	0.0656584
CBV_PAM38216_c2_g1_i1	-0.914833	-0.0190586	0.0570362	0.876855
CBV_PAM64497_c0_g1_i1	-0.999679	0.202122	0.0474263	0.750132
CBV_PAM54720_c0_g1_i1	-1.03049	0.0801463	0.27927	0.67107
CBV_PAM50721_c1_g1_i1	-0.987505	-0.0198732	0.268834	0.738545
CBV_PAM4472_c0_g1_i1	-0.929679	-0.158129	0.309087	0.778722
CBV_PAM21798_c0_g1_i1	-1.01749	-0.0341469	0.549503	0.502135
CBV_PAM11255_c0_g1_i1	-0.717558	0.192221	-0.407706	0.933043
CBV_PAM69906_c0_g1_i1	-0.952497	-0.00613026	0.152578	0.806049
CBV_PAM53680_c0_g1_i1	-1.06062	0.163116	0.337954	0.55955
CBV_PAM66324_c0_g2_i1	-1.05299	0.463844	0.490548	0.098596
CBV_PAM45584_c0_g1_i1	-1.02147	0.677347	0.251594	0.0925287
CBV_PAM1096_c1_g1_i1	-0.919645	-0.0904189	0.18292	0.827144
CBV_PAM33116_c0_g1_i1	-0.953551	0.208072	-0.0386343	0.784114
CBV_PAM37333_c1_g1_i1	-0.983378	0.298648	-0.0305926	0.715322
CBV_PAM67789_c0_g1_i1	-0.864499	0.258146	-0.228597	0.83495
CBV_PAM64557_c0_g1_i1	-0.971079	-0.0980943	0.398704	0.670469
CBV_PAM68612_c0_g1_i1	-1.03198	0.649273	0.201876	0.180826
CBV_PAM2372_c0_g1_i1	-0.882795	0.802486	0.296544	-0.216235
CBV_PAM51015_c1_g1_i1	-0.895281	-0.200142	0.30778	0.787642
CBV_PAM52924_c0_g1_i1	-0.859026	-0.3034	0.425695	0.736731
CBV_PAM14564_c0_g1_i1	-1.02986	0.216856	0.166352	0.646649
CBV_PAM24009_c0_g1_i1	-1.05791	0.324035	0.195927	0.53795
CBV_PAM10433_c0_g1_i1	-0.857261	-0.10098	0.066214	0.892027
CBV_PAM461_c1_g1_i1	-0.98721	0.144495	0.109806	0.73291
CBV_PAM64161_c1_g1_i1	-1.06313	0.206267	0.380034	0.476826
CBV_PAM57150_c0_g1_i1	-0.943039	-0.100388	0.297683	0.745744
CBV_PAM23716_c0_g1_i1	-0.809148	-0.251453	0.167503	0.893098
CBV_PAM38731_c0_g1_i1	-0.855408	-0.0847685	0.0442148	0.895962
CBV_PAM37742_c0_g1_i1	-0.963676	0.0342242	0.16461	0.764842
CBV_PAM65852_c0_g1_i1	-0.908402	-0.0558701	0.1297	0.834572
CBV_PAM52428_c1_g1_i1	-1.0544	0.220811	0.536234	0.297351
CBV_PAM52965_c0_g1_i1	-1.06253	0.264637	0.493717	0.304178
CBV_PAM68615_c0_g1_i1	-0.873014	-0.272095	0.42724	0.717869
CBV_PAM30219_c0_g1_i1	-1.05553	0.477436	0.182882	0.395209
CBV_PAM56735_c0_g1_i1	-0.998195	0.0089618	0.346179	0.643054
CBV_PAM28934_c0_g1_i1	-1.06607	0.40904	0.274642	0.382385
CBV_PAM52602_c0_g1_i1	-0.950154	0.108606	0.0630611	0.778487
CBV_PAM12802_c0_g1_i1	-0.985402	0.111735	0.154881	0.718786
CBV_PAM2585_c0_g1_i1	-1.004	0.0180416	0.401187	0.584768
CBV_PAM37203_c0_g2_i1	-0.790864	-0.382498	0.432077	0.741285
CBV_PAM64682_c1_g1_i1	-0.978619	0.0930762	0.16974	0.715803
CBV_PAM41979_c0_g1_i1	-0.900507	-0.231527	0.577258	0.554776
CBV_PAM66805_c0_g1_i1	-0.849861	0.814755	0.260382	-0.225275
CBV_PAM67083_c0_g1_i1	-0.941668	-0.10504	0.356897	0.689811
CBV_PAM14269_c0_g1_i1	-0.848568	0.217633	-0.200086	0.831021
CBV_PAM15048_c0_g1_i1	-1.04309	0.256435	0.518448	0.268211
CBV_PAM67379_c0_g1_i1	-0.983256	-0.00450778	0.367923	0.619842
CBV_PAM54095_c0_g1_i1	-0.760202	-0.175566	-0.000596121	0.936364
CBV_PAM25826_c0_g1_i1	-0.668899	0.493418	-0.535716	0.711197
CBV_PAM12697_c0_g1_i1	-0.979031	2.07954e-05	0.341572	0.637439
CBV_PAM45224_c0_g1_i1	-0.851818	-0.0488526	0.0335969	0.867074
CBV_PAM39188_c0_g1_i1	-0.833166	-0.145431	0.111565	0.867032
CBV_PAM52914_c0_g1_i1	-0.97238	0.609248	0.401322	-0.0381903
CBV_PAM64855_c1_g1_i1	-0.983163	0.0603871	0.257884	0.664892
CBV_PAM51687_c1_g5_i1	-1.04138	0.20769	0.380758	0.452932
CBV_PAM66067_c0_g1_i1	-1.03224	0.152535	0.41377	0.465932
CBV_PAM19222_c0_g1_i1	-0.980474	0.373536	-0.00480099	0.611739
CBV_PAM12365_c0_g1_i1	-0.827528	0.10191	-0.14391	0.869528
CBV_PAM39444_c0_g1_i1	-0.90118	0.440205	-0.19292	0.653896
CBV_PAM11683_c0_g1_i1	-1.00457	0.0568961	0.410342	0.537329
CBV_PAM36331_c0_g1_i1	-0.950554	-0.0994557	0.485162	0.564847
CBV_PAM64129_c0_g1_i1	-1.0058	0.226674	0.165702	0.613425
CBV_PAM24731_c0_g1_i1	-0.772747	0.837761	-0.319645	0.254631
CBV_PAM73433_c0_g1_i1	-0.965315	-0.0629027	0.502986	0.525232
CBV_PAM64624_c1_g1_i1	-0.97907	0.156409	0.145037	0.677624
CBV_PAM2719_c0_g1_i1	-1.03559	0.445916	0.200428	0.389247
CBV_PAM67131_c0_g1_i1	-0.773842	0.0136642	-0.155402	0.91558
CBV_PAM64393_c0_g1_i1	-1.03434	0.493213	0.27096	0.270171
CBV_PAM65002_c0_g1_i1	-0.982257	0.0786329	0.25393	0.649695
CBV_PAM11490_c0_g1_i1	-0.803448	-0.0709922	-0.022411	0.896851
CBV_PAM25450_c0_g1_i1	-0.935445	0.0120527	0.185924	0.737468
CBV_PAM54864_c0_g1_i1	-0.887849	0.41137	-0.193902	0.670381
CBV_PAM23942_c1_g1_i1	-0.981543	0.0855032	0.260309	0.635731
CBV_PAM50766_c0_g1_i1	-1.02592	0.293961	0.237476	0.494486
CBV_PAM38592_c2_g1_i1	-1.00327	0.538052	0.100881	0.364335
CBV_PAM71256_c0_g3_i1	-0.956059	0.69394	0.144255	0.117864
CBV_PAM5235_c1_g1_i1	-1.00545	0.10793	0.494476	0.403043
CBV_PAM37588_c0_g1_i1	-0.793578	-0.237616	0.191578	0.839616
CBV_PAM64758_c0_g1_i1	-0.826638	-0.205103	0.225462	0.806278
CBV_PAM23682_c0_g8_i1	-0.879643	0.0273596	0.0467126	0.805571
CBV_PAM51260_c1_g1_i1	-0.915931	-0.0993845	0.333129	0.682187
CBV_PAM64616_c1_g1_i1	-0.987897	0.195721	0.179319	0.612858
CBV_PAM43004_c0_g1_i1	-0.991258	0.205971	0.182181	0.603106
CBV_PAM64501_c0_g1_i1	-0.797738	0.162859	-0.210033	0.844912
CBV_PAM921_c2_g1_i1	-0.865449	-0.090238	0.157369	0.798318
CBV_PAM51297_c0_g1_i1	-1.01935	0.446877	0.196018	0.376459
CBV_PAM68508_c0_g1_i1	-0.862498	-0.133301	0.215991	0.779807
CBV_PAM54152_c1_g1_i1	-0.830919	-0.296435	0.531885	0.595469
CBV_PAM16358_c1_g1_i1	-0.917282	0.713563	0.247645	-0.0439256
CBV_PAM10293_c0_g1_i1	-0.982944	0.176252	0.191908	0.614785
CBV_PAM27736_c0_g1_i1	-0.991092	0.233961	0.170643	0.586489
CBV_PAM14906_c0_g1_i1	-1.00123	0.119983	0.488437	0.392812
CBV_PAM54022_c0_g1_i1	-0.870111	0.100233	-0.0244736	0.794351
CBV_PAM30502_c0_g1_i1	-0.916407	0.427207	-0.112268	0.601469
CBV_PAM691_c0_g1_i1	-0.98521	0.0691851	0.484119	0.431905
CBV_PAM51745_c0_g1_i1	-0.923859	-0.0499771	0.315194	0.658642
CBV_PAM51256_c0_g1_i1	-0.956612	0.301579	0.0394024	0.615631
CBV_PAM40294_c0_g1_i1	-0.91009	0.079792	0.0936137	0.736684
CBV_PAM27418_c0_g1_i1	-0.994762	0.16874	0.297349	0.528673
CBV_PAM52755_c0_g1_i1	-1.00155	0.188219	0.491904	0.321424
CBV_PAM10541_c0_g1_i1	-0.892963	0.191333	-0.0361014	0.737732
CBV_PAM39374_c0_g1_i1	-0.749068	0.662001	-0.390124	0.47719
CBV_PAM51207_c0_g1_i1	-0.931523	0.166524	0.0737897	0.691209
CBV_PAM19658_c0_g1_i1	-0.94235	0.2591	0.0333673	0.649882
CBV_PAM37252_c0_g1_i1	-0.905139	-0.104261	0.384566	0.624834
CBV_PAM10836_c0_g1_i1	-0.922442	-0.00438685	0.25426	0.672568
CBV_PAM67289_c1_g1_i1	-0.723622	-0.274486	0.131854	0.866254
CBV_PAM12345_c0_g1_i1	-0.959328	0.120594	0.220202	0.618532
CBV_PAM25083_c0_g1_i1	-0.992084	0.208845	0.268611	0.514628
CBV_PAM3501_c0_g1_i1	-0.820518	-0.194187	0.244525	0.770181
CBV_PAM16700_c0_g1_i1	-0.933421	-0.0535371	0.491764	0.495195
CBV_PAM1071_c0_g1_i1	-0.967484	0.144019	0.2425	0.580965
CBV_PAM67627_c0_g1_i1	-0.778279	0.131672	-0.186635	0.833241
CBV_PAM52000_c0_g3_i1	-0.959166	0.0467453	0.526885	0.385535
CBV_PAM27369_c0_g1_i1	-0.920837	0.0230799	0.229987	0.66777
CBV_PAM66484_c0_g1_i1	-0.719492	0.132431	-0.271319	0.858381
CBV_PAM1945_c0_g7_i1	-0.968865	0.0843769	0.386443	0.498045
CBV_PAM37570_c0_g1_i1	-0.913189	-0.083549	0.45153	0.545208
CBV_PAM41392_c0_g1_i1	-0.907538	-0.100489	0.497339	0.510688
CBV_PAM43326_c0_g1_i1	-0.995782	0.247189	0.35222	0.396373
CBV_PAM26892_c0_g1_i1	-0.878689	0.537191	-0.153718	0.495216
CBV_PAM57795_c0_g1_i1	-0.959487	0.219038	0.165864	0.574585
CBV_PAM64936_c0_g1_i1	-0.817752	-0.152876	0.200881	0.769746
CBV_PAM51181_c0_g1_i1	-0.832578	-0.0469615	0.0923738	0.787166
CBV_PAM24533_c0_g1_i1	-0.95457	0.08482	0.322182	0.547569
CBV_PAM23965_c0_g1_i1	-0.855153	0.032429	0.0589697	0.763754
CBV_PAM20703_c0_g1_i1	-0.799983	-0.154618	0.162051	0.792551
CBV_PAM41812_c0_g1_i1	-0.884007	0.40453	-0.118193	0.59767
CBV_PAM25847_c0_g1_i1	-0.892865	-0.104129	0.427027	0.569966
CBV_PAM64717_c0_g1_i1	-0.878374	-0.139398	0.464017	0.553755
CBV_PAM29055_c0_g1_i1	-0.913968	-0.00964822	0.310895	0.612721
CBV_PAM41157_c0_g1_i1	-0.663189	0.797381	-0.400083	0.265891
CBV_PAM3925_c0_g1_i1	-0.981836	0.303075	0.419278	0.259483
CBV_PAM26722_c0_g1_i1	-0.914839	-0.039898	0.454059	0.500678
CBV_PAM6870_c0_g1_i1	-0.855958	-0.00345522	0.118919	0.740494
CBV_PAM4589_c0_g1_i1	-0.935087	0.103199	0.237904	0.593984
CBV_PAM40478_c1_g1_i1	-0.960033	0.124499	0.423819	0.411715
CBV_PAM51756_c0_g1_i1	-0.823671	-0.0735466	0.13319	0.764028
CBV_PAM948_c0_g1_i1	-0.797526	-0.238375	0.350802	0.685098
CBV_PAM23615_c0_g1_i1	-0.894301	-0.0794404	0.438666	0.535076
CBV_PAM10291_c0_g1_i1	-0.756794	-0.20979	0.166572	0.800012
CBV_PAM2013_c0_g1_i1	-0.812778	-0.121009	0.175499	0.758287
CBV_PAM2513_c0_g3_i1	-0.978674	0.37089	0.323375	0.284408
CBV_PAM15064_c0_g1_i1	-0.881096	-0.035326	0.255739	0.660683
CBV_PAM10238_c0_g1_i1	-0.958195	0.135196	0.374586	0.448413
CBV_PAM19035_c0_g1_i1	-0.878701	-0.0608875	0.296273	0.643315
CBV_PAM2298_c0_g1_i1	-0.896207	0.44695	-0.0698809	0.519138
CBV_PAM66794_c0_g1_i1	-0.804845	-0.219132	0.349843	0.674134
CBV_PAM64161_c2_g1_i1	-0.908864	-0.0340331	0.490262	0.452635
CBV_PAM24707_c0_g1_i1	-0.967521	0.441601	0.239027	0.286892
CBV_PAM25178_c0_g1_i1	-0.95876	0.147769	0.418486	0.392505
CBV_PAM3339_c0_g1_i1	-0.804444	0.180473	-0.130576	0.754546
CBV_PAM39978_c0_g1_i1	-0.899268	-0.04935	0.495437	0.453181
CBV_PAM38385_c0_g1_i1	-0.938466	0.0756712	0.413751	0.449043
CBV_PAM2612_c0_g1_i1	-0.864807	0.579964	0.396886	-0.112044
CBV_PAM25353_c1_g1_i1	-0.828102	-0.116866	0.240599	0.70437
CBV_PAM3003_c0_g1_i1	-0.925226	0.0804952	0.295534	0.549197
CBV_PAM65395_c0_g1_i1	-0.794797	-0.0893997	0.109843	0.774353
CBV_PAM65938_c0_g1_i1	-0.900676	-0.0358211	0.455662	0.480835
CBV_PAM13110_c0_g1_i1	-0.872634	-0.0111543	0.221916	0.661873
CBV_PAM15094_c0_g1_i1	-0.949199	0.176707	0.480396	0.292096
CBV_PAM70920_c0_g1_i1	-0.786137	-0.0100114	0.00231621	0.793833
CBV_PAM54676_c0_g1_i1	-0.822608	-0.0527552	0.133162	0.742201
CBV_PAM24579_c0_g1_i1	-0.750313	-0.237837	0.232104	0.756045
CBV_PAM55651_c0_g1_i1	-0.849291	0.0777455	0.0576305	0.713915
CBV_PAM33230_c0_g1_i1	-0.635343	-0.44934	0.390446	0.694237
CBV_PAM13738_c0_g1_i1	-0.933214	0.0874606	0.44531	0.400443
CBV_PAM52003_c0_g1_i1	-0.848238	0.0225672	0.116266	0.709404
CBV_PAM24633_c1_g1_i1	-0.8848	0.643066	0.190029	0.051705
CBV_PAM23645_c0_g1_i1	-0.744755	-0.15117	0.0950946	0.80083
CBV_PAM14185_c0_g1_i1	-0.918699	0.117565	0.244623	0.556511
CBV_PAM5353_c0_g1_i1	-0.919377	0.111689	0.25718	0.550508
CBV_PAM40084_c0_g1_i1	-0.864769	0.678495	0.0672434	0.119031
CBV_PAM51809_c0_g1_i1	-0.670801	-0.399934	0.390552	0.680183
CBV_PAM66295_c0_g1_i1	-0.826249	-0.0394966	0.145203	0.720543
CBV_PAM3047_c0_g1_i1	-0.764437	-0.198925	0.221098	0.742264
CBV_PAM10311_c0_g1_i1	-0.82913	0.273272	-0.113469	0.669326
CBV_PAM52930_c0_g3_i1	-0.541868	0.697108	-0.541868	0.386629
CBV_PAM65166_c1_g1_i1	-0.823795	-0.183754	0.511718	0.495831
CBV_PAM74358_c0_g1_i1	-0.954856	0.268804	0.329092	0.35696
CBV_PAM64816_c0_g1_i1	-0.871995	0.272028	-0.0185633	0.618531
CBV_PAM28862_c0_g1_i1	-0.662361	0.861657	-0.010739	-0.188558
CBV_PAM42361_c0_g1_i1	-0.931687	0.48889	0.295095	0.147702
CBV_PAM39873_c0_g1_i1	-0.812589	-0.0271682	0.102712	0.737045
CBV_PAM51669_c0_g1_i1	-0.900649	0.126188	0.178928	0.595532
CBV_PAM65634_c0_g6_i1	-0.734124	0.701031	-0.28377	0.316863
CBV_PAM27786_c0_g1_i1	-0.944539	0.355739	0.386511	0.202289
CBV_PAM65849_c0_g1_i1	-0.80056	0.629787	-0.194244	0.365017
CBV_PAM50746_c2_g1_i1	-0.784743	-0.0372828	0.0566631	0.765363
CBV_PAM21634_c0_g1_i1	-0.876541	0.0759901	0.164392	0.636158
CBV_PAM61507_c0_g1_i1	-0.882898	0.181743	0.0805525	0.620603
CBV_PAM64437_c0_g1_i1	-0.850629	-0.0975318	0.371808	0.576352
CBV_PAM65825_c0_g1_i1	-0.834841	0.0545625	0.0747947	0.705484
CBV_PAM8071_c0_g1_i1	-0.695232	-0.127216	-0.0162224	0.83867
CBV_PAM707_c4_g1_i1	-0.764822	0.758806	0.146744	-0.140728
CBV_PAM38649_c0_g1_i1	-0.862754	-0.0719611	0.422357	0.512358
CBV_PAM57416_c0_g1_i1	-0.850963	0.638899	0.2277	-0.0156367
CBV_PAM3138_c0_g1_i1	-0.887278	0.0110902	0.513297	0.362891
CBV_PAM12804_c0_g1_i1	-0.87021	0.140851	0.103682	0.625677
CBV_PAM55581_c0_g1_i1	-0.929616	0.357876	0.18101	0.390729
CBV_PAM11500_c0_g1_i1	-0.866375	0.108834	0.126166	0.631376
CBV_PAM10873_c0_g1_i1	-0.761734	-0.121713	0.133509	0.749938
CBV_PAM11107_c0_g1_i1	-0.779459	0.113102	-0.0746488	0.741006
CBV_PAM66716_c0_g1_i1	-0.88818	0.133229	0.179767	0.575184
CBV_PAM52277_c1_g1_i1	-0.800771	-0.0684612	0.167039	0.702193
CBV_PAM2412_c0_g1_i1	-0.789671	0.154665	-0.0809272	0.715934
CBV_PAM8268_c0_g1_i1	-0.905618	0.10153	0.323392	0.480697
CBV_PAM37476_c1_g1_i1	-0.777742	0.402112	-0.216439	0.592069
CBV_PAM38030_c0_g1_i1	-0.747278	0.0804399	-0.0997021	0.76654
CBV_PAM10180_c0_g3_i1	-0.867442	0.0817779	0.177126	0.608538
CBV_PAM64156_c0_g1_i1	-0.914447	0.269333	0.469925	0.175189
CBV_PAM70323_c0_g2_i1	-0.76324	-0.0146396	0.0198759	0.758003
CBV_PAM10397_c1_g1_i1	-0.829119	0.672037	0.0380061	0.119076
CBV_PAM51096_c0_g3_i1	-0.51887	0.715006	-0.51887	0.322735
CBV_PAM1063_c0_g1_i1	-0.755434	-0.238645	0.372385	0.621695
CBV_PAM1626_c1_g1_i1	-0.723378	-0.0569434	-0.0109583	0.791279
CBV_PAM24667_c0_g1_i1	-0.566215	0.648929	-0.492447	0.409732
CBV_PAM66040_c0_g1_i1	-0.788868	-0.153335	0.300282	0.64192
CBV_PAM38093_c0_g1_i1	-0.867011	-0.017697	0.488242	0.396465
CBV_PAM54876_c0_g1_i1	-0.721165	-0.0979944	0.0370648	0.782094
CBV_PAM53132_c1_g1_i1	-0.814045	0.589136	0.342644	-0.117735
CBV_PAM10688_c0_g1_i1	-0.735949	-0.135851	0.11926	0.75254
CBV_PAM23937_c0_g1_i1	-0.765501	0.0669567	-0.0408579	0.739402
CBV_PAM10526_c1_g1_i1	-0.869795	0.000892151	0.416694	0.452209
CBV_PAM51673_c0_g1_i1	-0.812297	0.662949	-0.0340953	0.183442
CBV_PAM57497_c0_g1_i1	-0.744423	-0.263639	0.476945	0.531118
CBV_PAM68320_c0_g1_i1	-0.91922	0.281634	0.365796	0.27179
CBV_PAM37265_c0_g4_i1	-0.867147	-0.00391157	0.425704	0.445355
CBV_PAM37181_c0_g1_i1	-0.811996	-0.0335998	0.18673	0.658866
CBV_PAM13269_c1_g1_i1	-0.815892	0.240187	-0.0567166	0.632421
CBV_PAM914_c0_g1_i1	-0.776044	-0.00453363	0.0599335	0.720645
CBV_PAM65017_c0_g1_i1	-0.867817	0.0842037	0.221802	0.561811
CBV_PAM14018_c0_g1_i1	-0.727429	-0.157743	0.146003	0.739169
CBV_PAM10519_c1_g1_i1	-0.775571	0.116812	-0.0505316	0.70929
CBV_PAM3269_c0_g1_i1	-0.885054	0.114629	0.268491	0.501934
CBV_PAM45122_c0_g1_i1	-0.724392	-0.149911	0.129522	0.744781
CBV_PAM38433_c0_g1_i1	-0.884702	0.0997639	0.300321	0.484617
CBV_PAM5463_c0_g1_i1	-0.757221	-0.106144	0.151089	0.712275
CBV_PAM52124_c0_g1_i1	-0.742417	0.0421017	-0.0467889	0.747104
CBV_PAM40413_c0_g1_i1	-0.90427	0.324091	0.395119	0.185061
CBV_PAM740_c0_g1_i1	-0.8875	0.427823	0.0966023	0.363075
CBV_PAM26540_c0_g1_i1	-0.875268	0.250297	0.106817	0.518154
CBV_PAM38422_c0_g1_i1	-0.698332	-0.0546001	-0.0311895	0.784121
CBV_PAM1100_c0_g1_i1	-0.891712	0.441674	0.309579	0.140458
CBV_PAM64909_c0_g1_i1	-0.816044	-0.105889	0.464843	0.45709
CBV_PAM19659_c0_g1_i1	-0.708058	0.0441526	-0.100347	0.764253
CBV_PAM17649_c0_g1_i1	-0.864552	0.0359492	0.371815	0.456788
CBV_PAM76221_c0_g1_i1	-0.831925	0.611007	0.153027	0.0678912
CBV_PAM25987_c2_g1_i1	-0.682697	-0.319199	0.393001	0.608895
CBV_PAM10455_c3_g1_i1	-0.728986	-0.0597796	0.0431458	0.745619
CBV_PAM3864_c0_g1_i1	-0.853746	0.00333912	0.442583	0.407824
CBV_PAM72908_c0_g1_i1	-0.875481	0.231537	0.145447	0.498498
CBV_PAM10387_c0_g1_i1	-0.841232	-0.000252112	0.30469	0.536794
CBV_PAM37259_c0_g1_i1	-0.821125	0.0563569	0.145336	0.619432
CBV_PAM65091_c0_g1_i1	-0.77271	0.112671	-0.0259053	0.685944
CBV_PAM68668_c0_g1_i1	-0.708141	-0.0731034	0.0252623	0.755982
CBV_PAM1022_c0_g1_i1	-0.758627	0.702697	-0.0270788	0.0830088
CBV_PAM38086_c1_g1_i1	-0.656744	0.784081	0.0414993	-0.168836
CBV_PAM38373_c0_g1_i1	-0.770835	0.0435809	0.0358136	0.691441
CBV_PAM13804_c0_g1_i1	-0.86026	0.161543	0.171445	0.527273
CBV_PAM2972_c0_g1_i1	-0.712179	-0.247412	0.332035	0.627556
CBV_PAM28285_c0_g1_i1	-0.811367	-0.0377623	0.265564	0.583566
CBV_PAM28144_c0_g1_i1	-0.869432	0.104969	0.310763	0.4537
CBV_PAM38315_c0_g2_i1	-0.811427	0.548651	-0.0620481	0.324824
CBV_PAM41949_c1_g1_i1	-0.807887	0.130599	0.048402	0.628886
CBV_PAM38287_c0_g1_i1	-0.750355	-0.0891276	0.151909	0.687573
CBV_PAM12135_c0_g1_i1	-0.764014	-0.0230633	0.0998678	0.68721
CBV_PAM71108_c0_g1_i1	-0.783165	-0.00638539	0.130415	0.659135
CBV_PAM17830_c0_g1_i1	-0.793821	0.247374	-0.059131	0.605578
CBV_PAM65072_c0_g1_i1	-0.813147	0.235434	-0.00625234	0.583966
CBV_PAM711_c0_g1_i1	-0.874625	0.13298	0.373099	0.368546
CBV_PAM52468_c0_g1_i1	-0.787207	-0.115722	0.365387	0.537542
CBV_PAM40984_c0_g1_i1	-0.852763	0.0645604	0.469198	0.319004
CBV_PAM64798_c0_g1_i1	-0.795635	0.0297751	0.132784	0.633075
CBV_PAM41227_c0_g1_i1	-0.7148	-0.253572	0.503481	0.464891
CBV_PAM1144_c0_g1_i1	-0.766143	-0.119974	0.285008	0.601108
CBV_PAM53391_c0_g1_i1	-0.529569	0.493726	-0.49107	0.526914
CBV_PAM13161_c0_g1_i1	-0.750515	-0.0247149	0.0890175	0.686213
CBV_PAM64742_c0_g5_i1	-0.486646	0.271888	-0.486646	0.701405
CBV_PAM705_c0_g1_i1	-0.796031	0.0260385	0.15501	0.614982
CBV_PAM50680_c0_g1_i1	-0.689655	0.128982	-0.159447	0.720119
CBV_PAM69536_c0_g1_i1	-0.847759	0.0984712	0.260746	0.488542
CBV_PAM10918_c0_g1_i1	-0.650574	0.581221	-0.332811	0.402164
CBV_PAM11662_c0_g1_i1	-0.868026	0.416864	0.207741	0.243421
CBV_PAM11845_c0_g1_i1	-0.811471	0.118254	0.105588	0.58763
CBV_PAM1081_c0_g1_i1	-0.831425	0.378442	0.0126422	0.440341
CBV_PAM1051_c0_g1_i1	-0.7969	-0.0273168	0.253952	0.570265
CBV_PAM505_c1_g1_i1	-0.787146	-0.0391915	0.241587	0.584751
CBV_PAM39727_c0_g1_i1	-0.820369	-0.0137683	0.428816	0.405321
CBV_PAM37642_c0_g1_i1	-0.857605	0.229034	0.183299	0.445272
CBV_PAM23954_c0_g1_i1	-0.725696	0.648905	0.223073	-0.146282
CBV_PAM65080_c0_g1_i1	-0.829192	0.0180421	0.433261	0.377889
CBV_PAM24515_c0_g1_i1	-0.6441	0.214304	-0.266181	0.695977
CBV_PAM64247_c1_g7_i1	-0.774949	0.206464	-0.0389843	0.607469
CBV_PAM64593_c0_g1_i1	-0.817988	-0.0105943	0.401377	0.427205
CBV_PAM1135_c1_g1_i1	-0.731834	0.0288631	0.0145793	0.688391
CBV_PAM64627_c0_g1_i1	-0.828263	0.0440572	0.478797	0.305409
CBV_PAM11401_c0_g1_i1	-0.795167	0.590534	0.149199	0.0554341
CBV_PAM37309_c0_g1_i1	-0.796651	-0.0450458	0.339021	0.502675
CBV_PAM67871_c1_g1_i1	-0.804161	0.0152482	0.257368	0.531544
CBV_PAM26475_c0_g1_i1	-0.818701	0.497223	0.271291	0.0501872
CBV_PAM57366_c0_g1_i1	-0.832233	0.118528	0.232126	0.481579
CBV_PAM10812_c0_g1_i1	-0.733681	0.473926	-0.182617	0.442372
CBV_PAM13134_c1_g1_i1	-0.80405	-0.0182657	0.438264	0.384051
CBV_PAM2650_c1_g1_i1	-0.854195	0.262987	0.21627	0.374938
CBV_PAM38985_c0_g1_i1	-0.758104	0.0673626	0.0554724	0.635269
CBV_PAM64648_c0_g1_i1	-0.810082	0.166028	0.105226	0.538828
CBV_PAM1716_c0_g1_i1	-0.859158	0.299337	0.291028	0.268793
CBV_PAM29795_c0_g1_i1	-0.799942	-0.0244414	0.418015	0.406368
CBV_PAM7452_c0_g1_i1	-0.651054	0.0876858	-0.158401	0.721769
CBV_PAM25286_c0_g1_i1	-0.636944	-0.0767088	-0.0376072	0.75126
CBV_PAM38633_c0_g1_i1	-0.671367	-0.273592	0.427802	0.517157
CBV_PAM24712_c1_g1_i1	-0.664257	0.0326565	-0.0914373	0.723037
CBV_PAM43829_c0_g1_i1	-0.82087	0.0562031	0.420383	0.344284
CBV_PAM65880_c0_g1_i1	-0.820674	0.109524	0.225608	0.485543
CBV_PAM28779_c0_g1_i1	-0.808526	0.120763	0.162094	0.52567
CBV_PAM64216_c2_g1_i1	-0.779753	0.0177116	0.194516	0.567525
CBV_PAM12605_c1_g1_i1	-0.761424	-0.0490605	0.236269	0.574215
CBV_PAM25977_c0_g1_i1	-0.791817	0.0107193	0.260116	0.520982
CBV_PAM50754_c0_g3_i1	-0.808428	0.253486	0.0606717	0.494269
CBV_PAM27107_c0_g1_i1	-0.785218	0.0559675	0.16506	0.564191
CBV_PAM54960_c1_g1_i1	-0.738117	-0.0889361	0.229418	0.597635
CBV_PAM55314_c1_g1_i1	-0.818899	0.0621219	0.379824	0.376953
CBV_PAM58392_c1_g1_i1	-0.664131	-0.267239	0.382393	0.548977
CBV_PAM50976_c0_g1_i1	-0.734676	0.644415	0.0405213	0.0497391
CBV_PAM13077_c0_g1_i1	-0.822239	0.095396	0.302593	0.42425
CBV_PAM10302_c0_g1_i1	-0.841589	0.34322	0.209888	0.288481
CBV_PAM25267_c0_g1_i1	-0.754119	0.251621	-0.0578113	0.56031
CBV_PAM13122_c0_g1_i1	-0.80983	0.360557	0.39771	0.0515628
CBV_PAM37223_c1_g1_i1	-0.783888	0.0266706	0.231196	0.526021
CBV_PAM10557_c0_g1_i1	-0.827329	0.365877	0.133604	0.327848
CBV_PAM37264_c1_g1_i1	-0.749388	-0.0938888	0.332548	0.510728
CBV_PAM23934_c0_g1_i1	-0.642971	-0.117579	0.0449757	0.715574
CBV_PAM26919_c0_g1_i1	-0.715415	0.236244	-0.120044	0.599215
CBV_PAM30856_c0_g1_i1	-0.794422	0.0117766	0.364199	0.418446
CBV_PAM1108_c0_g1_i1	-0.824789	0.211225	0.194199	0.419365
CBV_PAM37646_c0_g4_i1	-0.740146	-0.121122	0.380571	0.480696
CBV_PAM24156_c0_g2_i1	-0.788343	0.0456115	0.23307	0.509662
CBV_PAM53296_c0_g1_i1	-0.697109	-0.144255	0.224585	0.616778
CBV_PAM32272_c0_g1_i1	-0.680788	0.203954	-0.160054	0.636888
CBV_PAM32535_c0_g1_i1	-0.686495	0.658042	0.135722	-0.107269
CBV_PAM65120_c0_g1_i1	-0.82657	0.15865	0.362139	0.305781
CBV_PAM15173_c0_g1_i1	-0.719789	0.159901	-0.0600887	0.619977
CBV_PAM25877_c0_g1_i1	-0.758588	0.299365	-0.0508474	0.510071
CBV_PAM65545_c0_g1_i1	-0.663085	-0.198777	0.236589	0.625273
CBV_PAM66974_c0_g1_i1	-0.713605	-0.154185	0.344972	0.522818
CBV_PAM12334_c0_g1_i1	-0.750299	-0.0198878	0.207321	0.562867
CBV_PAM56372_c0_g1_i1	-0.636245	0.165269	-0.200418	0.671394
CBV_PAM39956_c0_g1_i1	-0.808063	0.182651	0.17593	0.449483
CBV_PAM66492_c1_g1_i1	-0.640926	-0.223284	0.22604	0.638169
CBV_PAM73886_c0_g1_i1	-0.742774	0.592649	0.121947	0.0281776
CBV_PAM52831_c0_g1_i1	-0.79998	0.457939	0.240709	0.101332
CBV_PAM50827_c0_g1_i1	-0.75552	0.195683	0.00539278	0.554444
CBV_PAM37325_c1_g1_i1	-0.761652	0.0409291	0.171609	0.549114
CBV_PAM24059_c1_g1_i1	-0.807163	0.114653	0.29679	0.39572
CBV_PAM1446_c0_g1_i1	-0.644575	-0.252769	0.332469	0.564874
CBV_PAM38749_c0_g1_i1	-0.749991	0.150058	0.0322708	0.567662
CBV_PAM1265_c0_g1_i1	-0.650944	-0.0616466	0.0197041	0.692886
CBV_PAM65456_c0_g1_i1	-0.716938	-0.00867543	0.10853	0.617084
CBV_PAM71761_c0_g1_i1	-0.692927	-0.127553	0.222123	0.598356
CBV_PAM38539_c0_g1_i1	-0.755687	0.208804	0.0148357	0.532047
CBV_PAM50699_c0_g1_i1	-0.685073	0.13976	-0.085681	0.630994
CBV_PAM66982_c0_g1_i1	-0.714783	-0.135794	0.410467	0.44011
CBV_PAM66883_c0_g1_i1	-0.802847	0.407465	0.23141	0.163972
CBV_PAM51371_c1_g1_i1	-0.777089	0.0230299	0.406703	0.347356
CBV_PAM64214_c0_g8_i1	-0.715207	-0.00928626	0.122983	0.60151
CBV_PAM65844_c2_g1_i1	-0.734873	0.53631	-0.0414572	0.24002
CBV_PAM28627_c0_g1_i1	-0.638215	-0.264028	0.421529	0.480714
CBV_PAM2096_c0_g1_i1	-0.744021	0.157474	0.0352788	0.551268
CBV_PAM53383_c0_g1_i1	-0.723452	-0.108616	0.389363	0.442705
CBV_PAM43497_c0_g1_i1	-0.697945	-0.0361601	0.118407	0.615699
CBV_PAM60412_c0_g1_i1	-0.719682	0.168272	-0.0260681	0.577478
CBV_PAM1420_c0_g1_i1	-0.714241	-0.0832016	0.248522	0.54892
CBV_PAM58650_c0_g1_i1	-0.669625	-0.0317684	0.0469696	0.654423
CBV_PAM2489_c0_g1_i1	-0.715675	0.0622583	0.056244	0.597173
CBV_PAM69653_c0_g1_i1	-0.765076	0.00298557	0.383956	0.378134
CBV_PAM10215_c1_g1_i1	-0.78869	0.251079	0.118011	0.4196
CBV_PAM37575_c0_g1_i1	-0.768962	0.241753	0.0566413	0.470568
CBV_PAM15251_c0_g1_i1	-0.722086	0.0995116	0.0408059	0.581768
CBV_PAM38919_c0_g1_i1	-0.795459	0.148048	0.26406	0.38335
CBV_PAM1858_c0_g1_i1	-0.677811	-0.18645	0.413701	0.450559
CBV_PAM66896_c0_g1_i1	-0.610118	-0.26126	0.28886	0.582517
CBV_PAM41260_c1_g1_i1	-0.738734	0.110892	0.0816825	0.546159
CBV_PAM53354_c0_g1_i1	-0.707795	0.187001	-0.048559	0.569353
CBV_PAM42830_c0_g1_i1	-0.766708	0.0429532	0.433822	0.289933
CBV_PAM12485_c0_g1_i1	-0.542729	0.109475	-0.262391	0.695644
CBV_PAM65163_c1_g1_i1	-0.754067	-0.00512312	0.413412	0.345778
CBV_PAM23612_c0_g1_i1	-0.598667	0.031426	-0.12758	0.694821
CBV_PAM41107_c0_g1_i1	-0.625406	0.00783517	-0.062181	0.679752
CBV_PAM13344_c1_g1_i1	-0.656617	-0.13991	0.188944	0.607582
CBV_PAM64655_c0_g1_i1	-0.667709	-0.191463	0.42142	0.437751
CBV_PAM14630_c0_g1_i1	-0.761825	0.0484421	0.441894	0.271489
CBV_PAM3137_c0_g1_i1	-0.619449	0.212814	-0.207712	0.614347
CBV_PAM10592_c4_g1_i1	-0.767657	0.0762872	0.272082	0.419288
CBV_PAM38998_c0_g1_i1	-0.655031	0.205175	-0.139923	0.589779
CBV_PAM64809_c0_g1_i1	-0.771532	0.104757	0.404109	0.262666
CBV_PAM39147_c0_g1_i1	-0.767468	0.196488	0.132264	0.438716
CBV_PAM50899_c0_g1_i1	-0.776628	0.342243	0.316999	0.117387
CBV_PAM50792_c0_g1_i1	-0.788347	0.308717	0.215694	0.263936
CBV_PAM51754_c0_g2_i1	-0.700851	0.214624	-0.0530902	0.539317
CBV_PAM64325_c1_g1_i1	-0.704373	-0.0572335	0.241559	0.520047
CBV_PAM68799_c0_g1_i1	-0.703194	-0.0712723	0.27631	0.498156
CBV_PAM16141_c0_g1_i1	-0.749909	0.466535	0.103649	0.179725
CBV_PAM23682_c0_g5_i1	-0.623328	0.10836	-0.122726	0.637695
CBV_PAM24100_c0_g1_i1	-0.714834	-0.0610949	0.337824	0.438105
CBV_PAM44411_c0_g1_i1	-0.656177	-0.0857788	0.141339	0.600616
CBV_PAM23740_c0_g1_i1	-0.783295	0.278133	0.252556	0.252606
CBV_PAM23669_c0_g2_i1	-0.750128	0.0426956	0.35482	0.352612
CBV_PAM50886_c0_g1_i1	-0.670009	0.0373778	0.0299876	0.602644
CBV_PAM40115_c0_g1_i1	-0.721416	0.26988	-0.0177001	0.469237
CBV_PAM12445_c0_g1_i1	-0.769274	0.154636	0.242801	0.371837
CBV_PAM12133_c0_g1_i1	-0.757115	0.108495	0.231512	0.417107
CBV_PAM64176_c0_g1_i1	-0.720216	0.164819	0.0407784	0.514619
CBV_PAM14521_c0_g1_i1	-0.605311	0.155989	-0.175211	0.624533
CBV_PAM64782_c1_g1_i1	-0.759448	0.411036	0.128549	0.219862
CBV_PAM13455_c0_g1_i1	-0.720403	0.0454185	0.173024	0.50196
CBV_PAM55782_c0_g1_i1	-0.618705	-0.0643448	0.0395753	0.643474
CBV_PAM68500_c0_g1_i1	-0.602136	-0.105846	0.0558134	0.652169
CBV_PAM27867_c0_g1_i1	-0.602589	-0.198811	0.202746	0.598654
CBV_PAM66157_c0_g1_i1	-0.584924	-0.0119096	-0.07672	0.673553
CBV_PAM65670_c0_g1_i1	-0.664085	-0.143181	0.330483	0.476782
CBV_PAM37396_c0_g1_i1	-0.657263	0.000856285	0.0546784	0.601728
CBV_PAM923_c0_g1_i1	-0.76749	0.208427	0.219086	0.339977
CBV_PAM51679_c1_g1_i1	-0.692773	-0.00943796	0.165241	0.53697
CBV_PAM2218_c0_g1_i1	-0.747797	0.0795793	0.392341	0.275877
CBV_PAM1077_c0_g1_i1	-0.646191	0.183382	-0.110841	0.57365
CBV_PAM28651_c0_g1_i1	-0.625441	-0.200409	0.32792	0.497929
CBV_PAM25095_c0_g1_i1	-0.621352	0.0567072	-0.0623037	0.626949
CBV_PAM55791_c0_g1_i1	-0.708692	0.298279	-0.0273595	0.437772
CBV_PAM64213_c0_g1_i1	-0.742063	0.401982	0.241037	0.0990437
CBV_PAM51234_c0_g1_i1	-0.752037	0.15556	0.227635	0.368843
CBV_PAM42453_c0_g1_i1	-0.704205	-0.0196072	0.267145	0.456667
CBV_PAM38368_c0_g1_i1	-0.660815	-0.138997	0.402095	0.397716
CBV_PAM1786_c0_g1_i1	-0.708058	0.006023	0.232644	0.469391
CBV_PAM51464_c0_g1_i1	-0.755809	0.162055	0.279756	0.313998
CBV_PAM38002_c0_g1_i1	-0.629238	-0.19376	0.385068	0.437931
CBV_PAM24782_c0_g1_i1	-0.655128	-0.0854914	0.200836	0.539784
CBV_PAM25166_c0_g1_i1	-0.732149	0.137056	0.16342	0.431673
CBV_PAM38566_c2_g1_i1	-0.742504	0.110034	0.270214	0.362256
CBV_PAM64902_c0_g1_i1	-0.601234	-0.0320725	-0.00191168	0.635218
CBV_PAM3752_c0_g1_i1	-0.623832	-0.128209	0.179458	0.572583
CBV_PAM30588_c0_g1_i1	-0.629521	0.560133	0.196195	-0.126807
CBV_PAM514_c0_g1_i1	-0.732674	0.261209	0.0821727	0.389292
CBV_PAM26759_c0_g1_i1	-0.694748	-0.0453436	0.393545	0.346546
CBV_PAM1935_c0_g1_i1	-0.636281	-0.011695	0.059283	0.588694
CBV_PAM28576_c0_g1_i1	-0.678315	-0.00911929	0.174639	0.512796
CBV_PAM52178_c2_g1_i1	-0.607893	0.519442	-0.189126	0.277577
CBV_PAM38273_c0_g1_i1	-0.714147	0.34239	0.0235232	0.348234
CBV_PAM10195_c1_g1_i1	-0.646425	-0.0939225	0.218046	0.522301
CBV_PAM65043_c0_g1_i1	-0.674132	0.514613	0.16242	-0.00290201
CBV_PAM68327_c0_g1_i1	-0.706221	0.0233065	0.421317	0.261597
CBV_PAM2095_c1_g1_i1	-0.726181	0.272853	0.0890917	0.364236
CBV_PAM50772_c0_g1_i1	-0.738976	0.285379	0.158367	0.29523
CBV_PAM39904_c0_g1_i1	-0.715826	0.205948	0.0909976	0.418881
CBV_PAM66505_c0_g1_i1	-0.730752	0.302933	0.11148	0.316339
CBV_PAM29985_c0_g1_i1	-0.671273	0.521934	0.0528444	0.0964942
CBV_PAM24285_c0_g12_i1	-0.671016	0.518612	0.11941	0.0329945
CBV_PAM58589_c0_g1_i1	-0.617887	0.248609	-0.148583	0.517861
CBV_PAM25108_c0_g6_i1	-0.603431	0.593533	-0.0870827	0.0969807
CBV_PAM37977_c0_g1_i1	-0.664842	-0.0196196	0.176385	0.508077
CBV_PAM10637_c1_g1_i1	-0.604527	0.177579	-0.133543	0.560491
CBV_PAM66125_c0_g1_i1	-0.709189	0.0472052	0.355319	0.306665
CBV_PAM4363_c0_g1_i1	-0.617131	-0.168253	0.345648	0.439736
CBV_PAM64482_c0_g1_i1	-0.657848	0.0420631	0.0870673	0.528718
CBV_PAM23818_c0_g1_i1	-0.723375	0.279696	0.125709	0.31797
CBV_PAM2297_c0_g1_i1	-0.599995	-0.108275	0.139976	0.568294
CBV_PAM52017_c1_g1_i1	-0.617597	-0.0941868	0.170397	0.541386
CBV_PAM68486_c0_g1_i1	-0.670467	0.240559	-0.020159	0.450066
CBV_PAM50700_c0_g1_i1	-0.691806	0.0615435	0.199354	0.430908
CBV_PAM65237_c0_g1_i1	-0.561177	-0.208563	0.224234	0.545506
CBV_PAM38775_c0_g1_i1	-0.622401	-0.0422501	0.113444	0.551207
CBV_PAM11999_c0_g1_i1	-0.70304	0.16954	0.124938	0.408563
CBV_PAM24406_c0_g1_i1	-0.595168	0.0849866	-0.0706724	0.580854
CBV_PAM23863_c0_g1_i1	-0.703151	0.0879832	0.230469	0.384699
CBV_PAM24122_c1_g1_i1	-0.587816	-0.149627	0.192498	0.544945
CBV_PAM39767_c0_g1_i1	-0.706782	0.0994188	0.246554	0.36081
CBV_PAM10874_c0_g1_i1	-0.669539	-0.0300793	0.311614	0.388004
CBV_PAM38322_c2_g1_i1	-0.692571	0.399343	0.0703953	0.222833
CBV_PAM10252_c0_g2_i1	-0.628353	-0.0656236	0.189523	0.504454
CBV_PAM51070_c0_g1_i1	-0.633685	0.439843	0.291085	-0.0972423
CBV_PAM23702_c0_g1_i1	-0.545634	0.204688	-0.20987	0.550816
CBV_PAM51631_c0_g1_i1	-0.62207	-0.0692535	0.17993	0.511394
CBV_PAM37999_c0_g1_i1	-0.627167	0.516187	0.154343	-0.0433629
CBV_PAM13023_c0_g1_i1	-0.697172	0.291358	0.0818128	0.324001
CBV_PAM51520_c0_g1_i1	-0.69774	0.106288	0.228645	0.362807
CBV_PAM37359_c1_g1_i1	-0.701568	0.117253	0.240969	0.343346
CBV_PAM38965_c1_g1_i1	-0.621529	0.022786	0.060248	0.538495
CBV_PAM37506_c0_g1_i1	-0.607013	0.0821329	-0.0268586	0.551739
CBV_PAM12968_c0_g1_i1	-0.667897	0.104073	0.104292	0.459532
CBV_PAM23758_c0_g1_i1	-0.59412	-0.10789	0.172235	0.529774
CBV_PAM25092_c0_g1_i1	-0.674182	0.0189841	0.363879	0.291319
CBV_PAM57095_c0_g1_i1	-0.645359	0.481002	0.151569	0.012788
CBV_PAM931_c0_g1_i1	-0.637621	-0.0762448	0.318813	0.395054
CBV_PAM44730_c0_g1_i1	-0.523442	0.215304	-0.233877	0.542015
CBV_PAM26338_c0_g1_i1	-0.609637	0.0835849	-0.0112069	0.537259
CBV_PAM24693_c0_g1_i1	-0.572227	0.180808	-0.142748	0.534167
CBV_PAM38279_c0_g1_i1	-0.670384	0.0338957	0.245024	0.391464
CBV_PAM51326_c0_g1_i1	-0.645173	0.0232546	0.148413	0.473505
CBV_PAM734_c0_g1_i1	-0.667237	0.0171177	0.366037	0.284083
CBV_PAM11371_c0_g1_i1	-0.691337	0.321164	0.245931	0.124242
CBV_PAM51248_c0_g1_i1	-0.665951	0.0909395	0.149553	0.425459
CBV_PAM14049_c0_g1_i1	-0.564696	-0.0752693	0.0706362	0.569329
CBV_PAM37531_c0_g1_i1	-0.679455	0.0982249	0.209035	0.372195
CBV_PAM40348_c0_g1_i1	-0.458499	0.293984	-0.331229	0.495744
CBV_PAM68851_c0_g1_i1	-0.614058	-0.109968	0.343553	0.380472
CBV_PAM38976_c1_g1_i1	-0.693774	0.238415	0.296758	0.158601
CBV_PAM66719_c0_g1_i1	-0.666564	0.0347214	0.364257	0.267586
CBV_PAM51373_c1_g1_i1	-0.679202	0.193589	0.114354	0.371259
CBV_PAM15261_c0_g1_i1	-0.656435	0.0646359	0.156526	0.435273
CBV_PAM52035_c0_g1_i1	-0.695141	0.281033	0.20266	0.211447
CBV_PAM66145_c0_g1_i1	-0.577281	-0.00988948	0.028481	0.558689
CBV_PAMKOG16_c0_g1_i1	-0.644847	0.143297	0.0459798	0.455571
CBV_PAM10188_c1_g6_i1	-0.524369	0.222701	-0.220381	0.522049
CBV_PAM39479_c0_g1_i1	-0.574413	-0.0719501	0.0990668	0.547297
CBV_PAM24761_c1_g1_i1	-0.609921	-0.0181541	0.121039	0.507035
CBV_PAM23780_c0_g1_i1	-0.504354	0.141551	-0.20781	0.570612
CBV_PAM40665_c0_g1_i1	-0.540201	0.555707	0.136388	-0.151894
CBV_PAM10358_c0_g1_i1	-0.594142	0.0862482	-0.0222404	0.530134
CBV_PAM37281_c0_g1_i1	-0.605893	-0.111197	0.321962	0.395128
CBV_PAM17606_c0_g1_i1	-0.687212	0.267862	0.151697	0.267654
CBV_PAM27506_c0_g1_i1	-0.636585	0.031037	0.148668	0.45688
CBV_PAM64989_c0_g1_i1	-0.611817	-0.0922635	0.309742	0.394339
CBV_PAM67313_c0_g1_i1	-0.685384	0.296408	0.202816	0.18616
CBV_PAM43591_c0_g1_i1	-0.653567	0.0359246	0.242538	0.375105
CBV_PAM52194_c0_g1_i1	-0.659296	0.196421	0.0807319	0.382143
CBV_PAM25802_c0_g1_i1	-0.564455	-0.102273	0.14486	0.521869
CBV_PAM38569_c0_g1_i1	-0.602525	0.0247553	0.0758498	0.50192
CBV_PAM37570_c0_g4_i1	-0.585424	0.483324	-0.0870292	0.189129
CBV_PAM24006_c0_g1_i1	-0.604116	0.381209	-0.0911484	0.314056
CBV_PAM65549_c0_g1_i1	-0.622806	0.012908	0.161982	0.447916
CBV_PAM730_c0_g1_i1	-0.544247	0.226592	-0.169413	0.487068
CBV_PAM50755_c0_g1_i1	-0.670133	0.212027	0.305395	0.152711
CBV_PAM52570_c0_g1_i1	-0.602029	-0.0135048	0.137415	0.478119
CBV_PAM1949_c0_g1_i1	-0.623726	0.109088	0.0621655	0.452473
CBV_PAM64311_c0_g1_i1	-0.63731	0.0244348	0.220694	0.392181
CBV_PAM5104_c0_g1_i1	-0.574946	-0.0630791	0.130401	0.507624
CBV_PAM23782_c1_g1_i1	-0.662122	0.107971	0.322884	0.231267
CBV_PAM54634_c0_g1_i1	-0.611459	0.135724	0.0139252	0.46181
CBV_PAM11207_c1_g1_i1	-0.642715	0.113091	0.127569	0.402054
CBV_PAM10826_c0_g1_i1	-0.549763	-0.00996657	0.0143943	0.545335
CBV_PAM37255_c0_g1_i1	-0.593326	0.464314	-0.037398	0.16641
CBV_PAM39170_c0_g1_i1	-0.567271	-0.0709125	0.139695	0.498488
CBV_PAM14922_c0_g1_i1	-0.591256	-0.0945396	0.360169	0.325626
CBV_PAM24082_c0_g1_i1	-0.658982	0.303188	0.166692	0.189101
CBV_PAM37541_c0_g1_i1	-0.592484	-0.0817197	0.292033	0.38217
CBV_PAM38198_c0_g1_i1	-0.602435	0.108893	0.0324544	0.461088
CBV_PAM10543_c0_g1_i1	-0.602271	-0.0586342	0.295544	0.365361
CBV_PAM40646_c0_g1_i1	-0.521089	0.320213	-0.209945	0.410822
CBV_PAM37245_c1_g1_i1	-0.652211	0.190528	0.322527	0.139156
CBV_PAM64303_c2_g1_i1	-0.514798	-0.219522	0.360735	0.373584
CBV_PAM67970_c0_g1_i1	-0.550972	0.0125067	0.0102215	0.528244
CBV_PAM27865_c0_g1_i1	-0.605551	-0.0463454	0.353767	0.298129
CBV_PAM10758_c0_g1_i1	-0.599826	-0.021046	0.190037	0.430835
CBV_PAM38424_c0_g1_i1	-0.574675	0.0368601	0.0398727	0.497942
CBV_PAM69271_c0_g1_i1	-0.572209	-0.100042	0.249426	0.422825
CBV_PAM10611_c0_g1_i1	-0.645297	0.287993	0.253281	0.104023
CBV_PAM1031_c0_g1_i1	-0.505677	-0.224857	0.382489	0.348045
CBV_PAM13681_c0_g1_i1	-0.52652	0.525804	0.096719	-0.096003
CBV_PAM29956_c0_g1_i1	-0.642214	0.134176	0.17849	0.329547
CBV_PAM40240_c1_g1_i1	-0.624577	0.261473	0.0313817	0.331722
CBV_PAM23682_c0_g1_i1	-0.5627	-0.119372	0.289402	0.392671
CBV_PAM10749_c0_g1_i1	-0.596191	0.10304	0.0458301	0.447321
CBV_PAM10743_c1_g1_i1	-0.651951	0.229643	0.218855	0.203453
CBV_PAM38624_c0_g1_i1	-0.651157	0.247214	0.198405	0.205537
CBV_PAM38035_c0_g2_i1	-0.635307	0.113786	0.343398	0.178122
CBV_PAM64778_c0_g1_i1	-0.605519	0.117564	0.0650767	0.422879
CBV_PAM10366_c0_g1_i1	-0.556497	-0.126831	0.298893	0.384435
CBV_PAM65193_c1_g1_i1	-0.616824	0.0381529	0.371491	0.20718
CBV_PAM50821_c0_g2_i1	-0.557983	-0.0757308	0.170494	0.46322
CBV_PAM15852_c0_g1_i1	-0.627906	0.0699846	0.238608	0.319313
CBV_PAM1562_c0_g1_i1	-0.604991	0.389891	0.183793	0.0313076
CBV_PAM24258_c2_g1_i1	-0.557068	0.43304	-0.090052	0.21408
CBV_PAM38116_c1_g1_i1	-0.630714	0.10233	0.250599	0.277784
CBV_PAM53794_c0_g1_i1	-0.539708	-0.122275	0.250232	0.411751
CBV_PAM10552_c0_g1_i1	-0.539321	0.0284598	0.0155731	0.495288
CBV_PAM23599_c1_g1_i1	-0.596635	0.264085	0.0033591	0.329191
CBV_PAM1222_c0_g1_i1	-0.613152	0.344777	0.110105	0.158269
CBV_PAM64993_c0_g1_i1	-0.561778	0.0200931	0.0892236	0.452462
CBV_PAM37351_c0_g3_i1	-0.554501	0.451799	-0.0245343	0.127235
CBV_PAM1204_c2_g1_i1	-0.599025	0.108975	0.110964	0.379086
CBV_PAM55211_c1_g1_i1	-0.519578	0.123588	-0.0842781	0.480268
CBV_PAM1153_c1_g1_i1	-0.551401	-0.0812907	0.242878	0.389814
CBV_PAM50971_c1_g1_i1	-0.532939	-0.129788	0.350072	0.312655
CBV_PAM53591_c1_g1_i1	-0.57029	0.035266	0.10744	0.427584
CBV_PAM64266_c1_g1_i1	-0.612447	0.312851	0.181762	0.117834
CBV_PAM37244_c0_g1_i1	-0.578434	-0.0243534	0.304952	0.297836
CBV_PAM20052_c0_g1_i1	-0.614513	0.186937	0.293138	0.134438
CBV_PAM24205_c0_g1_i1	-0.58006	-0.00738314	0.353934	0.233509
CBV_PAM24490_c0_g1_i1	-0.595339	0.256963	0.0303456	0.308029
CBV_PAM27064_c0_g1_i1	-0.592385	0.029108	0.268819	0.294459
CBV_PAM24758_c0_g1_i1	-0.592204	0.0546285	0.342259	0.195316
CBV_PAM24833_c0_g1_i1	-0.455598	0.216719	-0.215531	0.45441
CBV_PAM70618_c0_g1_i1	-0.5918	0.299986	0.252119	0.0396942
CBV_PAM25468_c0_g1_i1	-0.591912	0.0469535	0.238717	0.306242
CBV_PAM64347_c1_g1_i1	-0.571017	0.00723326	0.195696	0.368088
CBV_PAM967_c0_g1_i1	-0.549546	0.0037953	0.118392	0.427359
CBV_PAM70303_c0_g1_i1	-0.564254	-0.028919	0.334684	0.258488
CBV_PAM814_c0_g2_i1	-0.571045	0.0306426	0.158988	0.381415
CBV_PAM65778_c0_g1_i1	-0.571208	-0.0016588	0.245013	0.327854
CBV_PAM51684_c0_g1_i1	-0.55386	-0.0513919	0.315267	0.289985
CBV_PAM52280_c0_g1_i1	-0.576445	0.372348	0.100309	0.103787
CBV_PAM714_c0_g1_i1	-0.486565	-0.127283	0.148664	0.465185
CBV_PAM10354_c0_g1_i1	-0.57987	0.198008	0.0506044	0.331257
CBV_PAM23952_c0_g1_i1	-0.553616	0.0593707	0.0810998	0.413145
CBV_PAM65103_c0_g1_i1	-0.588436	0.0816708	0.215057	0.291708
CBV_PAM11091_c1_g1_i1	-0.516865	0.0617735	-0.00665632	0.461747
CBV_PAM25902_c0_g1_i1	-0.526515	-0.100501	0.309318	0.317698
CBV_PAM2152_c0_g1_i1	-0.582874	0.128943	0.122401	0.33153
CBV_PAM10449_c0_g1_i1	-0.583533	0.236421	0.280095	0.0670168
CBV_PAM39959_c0_g1_i1	-0.50967	-0.0807627	0.156266	0.434167
CBV_PAM52731_c0_g1_i1	-0.573886	0.0751519	0.15506	0.343674
CBV_PAM687_c1_g1_i1	-0.528697	0.142926	-0.032337	0.418108
CBV_PAM17584_c0_g1_i1	-0.510817	-0.0354104	0.0978318	0.448396
CBV_PAM50910_c0_g1_i1	-0.509526	-0.115501	0.282586	0.342441
CBV_PAM3944_c0_g1_i1	-0.557842	0.321039	0.00889701	0.227906
CBV_PAM807_c0_g1_i1	-0.567362	0.111288	0.114115	0.341959
CBV_PAM41049_c0_g1_i1	-0.571998	0.322803	0.102675	0.14652
CBV_PAM1360_c0_g1_i1	-0.548394	-0.0166248	0.269591	0.295428
CBV_PAM50821_c0_g1_i1	-0.569985	0.181118	0.0882382	0.300629
CBV_PAM64156_c0_g4_i1	-0.527442	0.000453489	0.127454	0.399535
CBV_PAM1381_c1_g1_i1	-0.505523	0.00352316	0.0610691	0.44093
CBV_PAM37370_c0_g1_i1	-0.524806	0.0495728	0.0607211	0.414512
CBV_PAM11783_c0_g1_i1	-0.540157	0.0517766	0.107543	0.380837
CBV_PAM53047_c1_g1_i1	-0.482558	0.222553	-0.129408	0.389413
CBV_PAM27275_c0_g1_i1	-0.570803	0.185068	0.105826	0.27991
CBV_PAM10353_c1_g1_i1	-0.478869	0.126708	-0.089548	0.441709
CBV_PAM50669_c0_g1_i1	-0.531457	0.102259	0.038664	0.390534
CBV_PAM26042_c0_g1_i1	-0.554689	0.182645	0.0640469	0.307997
CBV_PAM1114_c1_g1_i1	-0.499542	-0.0982207	0.281294	0.316468
CBV_PAM52801_c0_g1_i1	-0.545117	0.113344	0.0848373	0.346935
CBV_PAM51560_c0_g1_i1	-0.535719	0.323229	1.95556e-05	0.21247
CBV_PAM51433_c0_g1_i1	-0.562487	0.270755	0.190036	0.101696
CBV_PAM10602_c0_g1_i1	-0.526153	0.0358885	0.117232	0.373033
CBV_PAM51762_c0_g1_i1	-0.535035	0.0829021	0.101802	0.35033
CBV_PAM50941_c0_g1_i1	-0.495988	-0.0725173	0.203435	0.36507
CBV_PAM673_c1_g5_i1	-0.563918	0.217204	0.170695	0.176019
CBV_PAM64212_c0_g1_i1	-0.496368	-0.0104086	0.0954264	0.41135
CBV_PAM66004_c0_g1_i1	-0.440021	0.147884	-0.138224	0.430361
CBV_PAM56678_c0_g1_i1	-0.499085	-0.0710269	0.309543	0.260569
CBV_PAM13469_c0_g1_i1	-0.46137	0.0474155	-0.0328017	0.446756
CBV_PAM41465_c0_g1_i1	-0.494786	-0.0654113	0.217222	0.342975
CBV_PAM37249_c0_g1_i1	-0.517999	0.320551	0.206552	-0.00910369
CBV_PAM10248_c1_g1_i1	-0.445106	0.459429	-0.00730239	-0.00702108
CBV_PAM24_c7_g1_i1	-0.528189	0.0215435	0.235	0.271645
CBV_PAM56182_c0_g1_i1	-0.478533	-0.0396406	0.11385	0.404323
CBV_PAM64144_c0_g1_i1	-0.528428	0.302678	0.185587	0.0401621
CBV_PAM50862_c0_g1_i1	-0.513624	0.175294	0.00443199	0.333898
CBV_PAM37332_c0_g1_i1	-0.462463	0.0702101	-0.0378781	0.430132
CBV_PAM965_c0_g1_i1	-0.503426	0.114907	0.026332	0.362187
CBV_PAM51254_c0_g1_i1	-0.522891	0.182599	0.296064	0.0442279
CBV_PAM64187_c5_g1_i1	-0.519506	0.0205401	0.277532	0.221434
CBV_PAM10301_c0_g1_i1	-0.439085	0.421038	0.123081	-0.105034
CBV_PAM24285_c1_g1_i1	-0.472014	-0.0837368	0.207055	0.348696
CBV_PAM37595_c0_g1_i1	-0.511403	0.302571	0.201545	0.00728687
CBV_PAM50720_c0_g2_i1	-0.478083	0.0110582	0.0841678	0.382857
CBV_PAM42675_c0_g1_i1	-0.47593	0.0551372	0.0322926	0.3885
CBV_PAM38145_c0_g1_i1	-0.494512	-0.00697587	0.186829	0.314659
CBV_PAM25741_c0_g1_i1	-0.493413	0.0111093	0.327721	0.154583
CBV_PAM11997_c0_g1_i1	-0.508518	0.0742256	0.296446	0.137846
CBV_PAM64238_c0_g1_i1	-0.507563	0.0410716	0.220687	0.245804
CBV_PAM11667_c0_g1_i1	-0.445757	0.384271	0.125794	-0.0643074
CBV_PAM1721_c0_g1_i1	-0.506386	0.123622	0.0903982	0.292365
CBV_PAM39419_c0_g1_i1	-0.465407	0.0502685	0.0426076	0.372531
CBV_PAM2206_c0_g1_i1	-0.451541	-0.0544424	0.147072	0.358911
CBV_PAM39635_c0_g1_i1	-0.465419	0.00494014	0.100127	0.360351
CBV_PAM25135_c0_g1_i1	-0.473154	-0.035617	0.226238	0.282533
CBV_PAM26029_c0_g1_i1	-0.45482	-0.0752816	0.266175	0.263927
CBV_PAM37619_c0_g1_i1	-0.482997	0.190103	0.00768314	0.285211
CBV_PAM10272_c0_g1_i1	-0.505306	0.162806	0.242936	0.0995648
CBV_PAM64235_c0_g1_i1	-0.446701	0.374951	0.0871123	-0.0153627
CBV_PAM65601_c0_g1_i1	-0.46109	-0.0364893	0.194457	0.303122
CBV_PAM46448_c0_g2_i1	-0.501435	0.226389	0.118454	0.156593
CBV_PAM65733_c0_g1_i1	-0.434544	0.0202566	0.0258026	0.388485
CBV_PAM23771_c0_g1_i1	-0.496507	0.249173	0.114845	0.132489
CBV_PAM754_c0_g1_i1	-0.444737	-0.0704992	0.216288	0.298948
CBV_PAM11213_c0_g1_i1	-0.390017	0.422437	0.0442043	-0.0766248
CBV_PAM51506_c0_g1_i1	-0.484236	0.0693648	0.127117	0.287753
CBV_PAM65789_c0_g1_i1	-0.4995	0.187794	0.106385	0.205321
CBV_PAM1899_c0_g1_i1	-0.474333	0.192189	0.00828858	0.273855
CBV_PAM37620_c1_g1_i1	-0.4816	0.245603	0.205639	0.0303572
CBV_PAM26996_c0_g1_i1	-0.472355	0.00399681	0.237807	0.230552
CBV_PAM37480_c1_g1_i1	-0.474686	0.0386067	0.291555	0.144525
CBV_PAM51875_c0_g1_i1	-0.430009	0.0845648	-0.0259452	0.371389
CBV_PAM12220_c0_g1_i1	-0.436875	0.0290493	0.0466105	0.361215
CBV_PAM23988_c1_g1_i1	-0.459656	0.135338	0.0273178	0.297001
CBV_PAM1229_c0_g1_i1	-0.477259	0.0697228	0.198634	0.208902
CBV_PAM23707_c0_g1_i1	-0.460867	0.17994	0.25506	0.0258664
CBV_PAM24816_c0_g1_i1	-0.440874	-0.0304824	0.190323	0.281033
CBV_PAM17483_c0_g1_i1	-0.441385	0.0383298	0.0768204	0.326235
CBV_PAM696_c0_g3_i1	-0.450348	-0.00202489	0.214635	0.237738
CBV_PAM64835_c0_g1_i1	-0.446716	-0.00693325	0.200598	0.253051
CBV_PAM10849_c0_g1_i1	-0.469448	0.118036	0.236668	0.114744
CBV_PAM10188_c1_g7_i1	-0.466607	0.169471	0.0695738	0.227562
CBV_PAM28900_c0_g1_i1	-0.418373	0.150937	-0.0473705	0.314807
CBV_PAM52954_c0_g1_i1	-0.426194	0.291664	0.1655	-0.0309703
CBV_PAM42565_c0_g1_i1	-0.433191	0.276175	-0.0156658	0.172682
CBV_PAM50903_c0_g1_i1	-0.461848	0.0973274	0.15446	0.21006
CBV_PAM11148_c0_g1_i1	-0.434089	0.0912145	0.04191	0.300964
CBV_PAM706_c1_g1_i1	-0.456649	0.143491	0.108917	0.204241
CBV_PAM64216_c0_g1_i1	-0.442297	0.0470805	0.235643	0.159573
CBV_PAM24019_c0_g1_i1	-0.310382	0.347781	-0.193094	0.155695
CBV_PAM910_c0_g1_i1	-0.448744	0.171982	0.0796661	0.197096
CBV_PAM50697_c0_g1_i1	-0.394291	-0.0649935	0.23723	0.222054
CBV_PAM52270_c0_g1_i1	-0.431931	0.114105	0.244752	0.0730741
CBV_PAM10736_c0_g1_i1	-0.397276	-0.0349147	0.294575	0.137616
CBV_PAM64223_c0_g1_i1	-0.402625	0.0544918	0.0473344	0.300799
CBV_PAM64520_c0_g1_i1	-0.413836	0.0512007	0.0990081	0.263627
CBV_PAM23698_c0_g1_i1	-0.402703	0.0153476	0.107854	0.279502
CBV_PAM23741_c0_g1_i1	-0.405872	0.165055	0.00727768	0.233539
CBV_PAM64709_c0_g1_i1	-0.421513	0.207486	0.0890244	0.125004
CBV_PAM513_c1_g1_i1	-0.402505	0.0193272	0.236933	0.146245
CBV_PAM65242_c0_g1_i1	-0.392665	0.124829	0.00312328	0.264712
CBV_PAM802_c0_g1_i1	-0.412434	0.0781867	0.124248	0.209999
CBV_PAM51906_c0_g1_i1	-0.374866	0.0262395	0.263287	0.0853394

[truncated: 5 more sheets: Subcluster11, Subcluster12, Subcluster13, Subcluster14, Subcluster15]
